# Supplementary material for: Contrasting Reproductive Strategies of Two Nymphaea Species Affect Existing Natural Genetic Diversity as Assessed by Microsatellite Markers: Implications for Conservation and Wetlands Restoration
Source: Front Plant Sci. 2022 Mar 9;13:773572. doi: 10.3389/fpls.2022.773572 (PMC8965595; doi:10.3389/fpls.2022.773572)
Supplement: Supplementary file 13 [file Data_Sheet_2.XLSX]

## Sheet: Sheet1
Sample ID	Population code	Nym_NGS1		Nym_NGS2		Nym_NGS8		Nym_NGS11		Nym_NGS21		Nym_NGS28		Nym_NGS31		Nym_NGS33		Nym_NGS34		Nym_NGS35		Nym_NGS36		Nym_NGS40		Nym_NGS45		Nym_NGS46		Nym_NGS51		Nym_NGS53		Nym_NGS54		Nym_NGS55		Nym_NGS61		Nym_NGS62		Nym_NGS63		Nym_NGS64		Nym_NGS65		Nym_NGS70
1S_1	1S	272	278	135	141	159	159	225	231	280	284	270	274	237	237	285	279	258	260	200	200	380	383	271	271	150	150	296	296	332	344	246	252	344	350	290	290	200	197	316	328	278	284	270	274	225	221	187	202
1S_2	1S	272	278	135	141	159	159	225	231	280	284	270	274	237	237	285	279	258	260	200	200	380	383	271	277	150	156	296	296	332	332	246	252	344	350	290	290	200	200	316	328	278	282	270	274	225	221	187	187
1S_3	1S	272	278	135	141	159	159	225	231	280	284	270	274	237	233	285	279	260	260	200	200	380	383	271	271	147	156	296	296	332	332	246	252	344	350	290	290	200	200	316	316	278	282	270	274	225	221	187	187
1S_4	1S	272	278	135	141	159	159	225	231	280	276	268	268	237	237	285	282	260	260	200	200	380	380	271	277	150	156	296	299	332	332	246	240	338	344	290	298	200	200	316	328	278	284	270	274	225	221	187	187
2S_1	2S	272	278	135	141	159	162	222	231	280	276	270	266	237	237	285	279	260	260	200	200	380	380	271	277	147	156	296	296	332	326	246	252	344	350	290	290	200	197	316	328	278	284	266	274	225	221	187	187
2S_2	2S	272	278	135	141	159	159	225	231	280	280	270	274	237	237	285	279	258	260	200	200	380	380	271	271	150	150	296	296	332	332	246	240	344	350	290	298	200	200	316	316	282	284	270	274	225	221	187	202
2S_3	2S	272	278	135	141	159	159	225	231	280	280	266	270	237	237	285	282	260	260	200	200	380	380	271	271	150	156	299	299	332	332	246	240	338	338	286	286	200	200	328	328	278	284	274	274	225	221	187	202
3aS_1	3S	272	278	135	141	159	165	225	231	280	276	268	268	237	233	285	282	258	260	200	200	380	383	271	277	147	156	299	302	332	350	246	252	344	350	290	290	200	200	316	328	284	284	270	274	225	221	187	187
3b_S1	3S	272	278	135	141	159	159	225	231	280	280	270	270	237	233	285	282	260	260	200	200	380	380	271	277	147	156	296	299	332	350	240	252	338	344	290	290	200	197	316	328	278	284	270	274	225	221	187	187
3b_S2	3S	272	278	135	141	159	162	225	231	280	280	268	268	237	233	285	282	260	260	200	200	380	380	271	271	147	156	296	299	344	344	246	240	338	350	290	298	200	197	316	316	284	284	270	274	225	225	193	193
4S_1	4S	272	281	135	141	159	159	231	231	280	276	270	266	237	237	285	282	260	262	200	200	380	380	271	277	147	147	296	299	326	344	246	246	344	344	290	290	200	200	316	328	278	282	270	274	225	221	187	187
4S_2	4S	272	278	135	141	159	162	225	231	280	280	266	270	237	237	285	279	260	262	200	200	380	380	271	271	147	156	299	299	344	344	246	240	344	350	290	290	197	197	316	328	278	284	266	274	225	221	187	193
4S_3	4S	272	278	135	141	159	162	225	231	280	276	268	268	237	237	285	282	260	262	200	200	380	380	271	271	147	156	299	302	344	350	246	240	338	350	290	290	200	200	316	316	284	284	270	274	225	221	193	193
5S_1	5S	272	281	135	145	159	159	222	231	274	274	266	282	237	237	285	282	260	260	200	196	380	383	271	277	147	156	296	296	332	332	246	246	344	344	290	298	200	197	316	316	278	284	270	274	225	221	187	187
5S_2	5S	272	278	135	145	159	159	222	231	280	280	270	270	237	237	285	282	258	258	200	200	380	380	271	271	150	156	296	299	332	332	246	240	344	344	290	290	200	200	316	316	282	284	266	274	225	221	193	193
5S_3	5S	272	278	135	145	159	159	225	231	280	284	270	270	237	237	285	285	258	260	200	200	380	380	271	271	150	150	9	9	332	332	246	240	344	344	290	290	200	200	316	316	276	284	270	274	225	221	193	193
6S_1	6S	272	278	135	141	159	156	225	231	280	284	270	266	237	237	285	282	258	260	200	196	380	380	271	277	147	153	296	299	332	344	246	252	344	350	290	298	200	200	316	322	278	282	270	274	225	221	187	202
6S_2	6S	272	278	135	141	159	156	225	231	280	284	268	268	237	237	285	285	258	260	200	200	380	380	271	280	150	156	299	299	332	344	246	252	344	350	290	290	197	197	316	316	278	278	270	274	225	221	193	193
6S_3	6S	9	9	135	141	159	159	9	9	280	284	266	266	237	237	285	282	258	260	200	200	380	380	271	277	150	150	299	299	332	344	246	240	338	350	290	298	200	200	316	316	278	278	270	274	225	221	193	193
7S_1	7S	272	278	135	141	159	156	225	231	280	276	270	266	237	237	285	282	258	260	200	200	380	380	271	277	147	147	290	299	332	332	246	240	338	344	290	298	200	200	316	322	278	282	270	274	225	221	187	187
7S_2	7S	272	278	135	141	159	162	225	231	280	276	270	270	237	237	285	285	258	260	200	196	380	380	271	277	150	156	9	9	332	332	246	240	344	344	290	294	200	200	316	316	282	284	270	274	225	221	187	202
7S_3	7S	272	278	135	141	159	156	222	231	280	276	270	266	237	237	285	285	258	260	200	200	380	380	271	277	147	156	299	299	326	332	246	240	338	350	286	298	200	200	316	316	284	284	270	274	225	221	187	187
8S_1	8S	272	278	135	141	159	159	231	231	280	276	270	266	237	237	285	282	260	262	200	200	380	380	271	277	147	147	296	299	326	344	246	246	344	344	290	290	200	200	316	328	278	284	270	274	225	221	187	187
8S_2	8S	272	278	135	141	159	159	231	231	280	276	270	266	237	237	285	282	258	260	200	200	380	380	271	277	147	147	9	9	326	344	246	240	344	350	290	298	200	197	313	313	278	278	270	274	225	221	187	202
8S_3	8S	272	278	135	141	159	159	231	231	280	276	270	266	237	237	285	282	258	260	200	196	380	380	271	277	147	156	296	299	332	332	246	240	344	350	286	298	200	200	316	316	278	284	270	274	225	221	187	202
9S_1	9S	272	278	135	141	159	159	225	231	280	280	270	270	237	237	285	279	258	260	200	200	380	380	271	277	147	153	296	299	332	332	246	252	344	350	290	290	200	200	316	316	278	284	270	274	225	221	187	187
9S_2	9S	272	278	135	144	159	159	225	231	280	280	270	270	237	237	285	282	260	262	200	200	380	380	271	280	147	147	296	296	332	344	246	252	344	350	290	290	200	197	316	316	278	278	270	274	225	221	187	202
9S_3	9S	272	278	135	141	159	159	222	231	280	280	270	270	237	237	285	282	258	260	200	196	380	380	271	271	147	156	299	299	326	326	246	240	344	344	290	298	200	203	316	328	278	278	270	274	225	221	187	187
10S_1	10S	272	272	135	145	159	159	222	231	274	274	266	282	237	237	285	282	260	260	200	196	380	383	271	277	147	156	296	296	332	332	246	246	344	344	290	298	200	197	316	316	278	284	270	274	225	221	187	187
10S_2	10S	272	278	135	145	159	156	222	231	280	276	266	282	237	237	285	282	262	262	200	200	380	380	271	271	156	156	296	296	326	344	246	240	338	350	290	290	200	203	316	316	276	284	270	274	225	221	187	187
10S_3	10S	272	278	135	141	159	156	222	231	280	280	270	266	237	237	282	282	262	262	200	200	380	380	271	271	147	156	296	296	326	344	246	240	344	344	290	298	200	200	316	316	278	278	270	274	225	221	199	199
11S_1	11S	272	281	135	141	159	156	225	231	280	276	270	266	237	233	285	282	258	260	200	200	380	380	271	277	147	156	296	296	344	350	240	252	338	350	290	298	200	200	316	316	278	284	270	274	225	221	187	202
11S_2	11S	272	275	135	141	159	156	225	231	280	276	270	266	237	233	285	282	258	260	200	200	380	380	271	277	153	156	296	296	332	350	246	240	338	344	290	298	200	197	316	322	278	278	270	274	225	221	187	202
11S_3	11S	272	275	135	141	159	156	9	9	280	276	270	266	237	233	282	282	258	260	200	200	380	380	271	271	147	156	296	296	332	350	246	240	338	344	290	290	200	200	316	316	284	284	270	274	225	221	187	187
12S_1	12S	272	275	135	141	159	156	225	231	280	276	270	266	237	237	285	282	258	260	200	196	380	380	271	277	147	153	296	299	332	344	246	252	344	350	290	298	200	200	316	322	278	282	270	274	225	221	187	202
12S_2	12S	272	278	135	141	159	156	225	231	280	276	266	266	237	237	285	282	260	260	200	196	380	380	271	277	147	153	296	299	332	332	246	252	344	350	290	298	200	200	316	322	278	282	270	274	225	221	187	187
12S_3	12S	272	278	135	141	159	156	225	231	280	276	266	266	237	237	285	282	258	260	200	196	380	380	271	277	147	150	296	299	332	332	246	240	338	344	290	298	200	200	316	322	282	282	270	274	225	221	187	187
12S_4	12S	272	278	135	141	159	156	225	231	280	276	270	266	237	237	285	282	258	260	200	200	380	380	271	277	147	147	290	299	332	332	246	240	338	344	290	298	200	200	316	322	278	282	270	274	225	221	187	187
13S_1	13S	272	278	135	141	159	156	225	231	280	276	270	266	237	237	285	282	258	260	200	200	380	380	271	277	147	147	290	299	332	332	246	240	338	344	290	298	200	197	316	322	278	282	270	274	225	221	187	187
13S_2	13S	272	272	135	141	159	156	225	231	280	276	270	266	237	233	9	9	258	260	200	200	380	380	271	277	147	147	290	299	332	332	246	240	344	344	286	286	197	197	316	316	278	284	270	274	225	221	187	187
13S_3	13S	272	272	135	141	159	156	225	231	280	276	270	266	237	233	9	9	258	260	200	200	380	380	271	277	147	147	290	299	332	332	246	240	338	338	290	290	200	197	316	316	278	284	274	274	225	221	187	187
K1_a	K1	272	278	135	141	159	159	225	231	280	284	270	270	237	233	285	282	260	260	200	200	383	386	271	280	150	156	293	293	332	350	240	252	338	350	290	298	200	197	316	328	278	290	270	274	225	223	187	202
K1_b	K1	272	272	135	143	159	159	225	231	280	284	270	278	237	237	285	282	260	260	200	200	380	383	271	280	150	156	293	299	332	326	246	252	344	350	290	290	200	197	316	328	278	278	270	274	225	221	187	202
K1_c	K1	272	281	135	143	159	159	225	231	280	284	270	274	237	233	285	282	260	260	200	200	380	383	271	277	150	156	293	299	332	344	240	252	338	350	290	290	200	197	316	328	278	282	270	274	225	221	187	202
K2_a	K2	272	272	135	139	159	156	225	231	280	284	270	278	237	237	285	279	258	260	200	200	380	383	271	280	150	156	293	296	326	326	246	252	344	347	290	290	200	200	316	316	278	284	266	274	225	219	187	202
K2_b	K2	272	275	135	139	159	156	225	231	280	284	270	278	237	237	285	279	258	260	200	200	380	383	271	280	150	156	293	296	332	332	246	252	344	347	290	290	200	200	316	316	278	284	266	274	225	219	187	202
K2_c	K2	272	275	135	139	159	156	225	231	280	284	270	278	237	237	285	279	258	260	200	200	380	383	271	280	150	156	293	296	332	332	246	252	344	347	290	290	200	200	316	316	278	284	266	274	225	219	187	202
K3_a	K3	272	275	135	141	159	159	225	234	280	284	270	270	237	237	285	282	258	260	200	200	380	383	271	280	150	156	296	296	332	332	246	252	344	347	290	290	200	200	316	328	278	282	266	274	225	221	187	202
K3_b	K3	272	275	135	143	159	159	225	234	280	284	270	270	237	237	285	279	262	262	200	196	380	383	271	280	150	156	293	299	332	332	246	252	344	347	290	298	200	197	316	328	278	278	270	274	225	221	187	202
K3_c	K3	272	275	135	141	159	159	225	234	280	276	270	270	237	233	285	282	260	260	200	200	380	383	271	280	150	156	293	299	332	338	240	252	338	350	290	290	200	197	316	328	278	282	270	274	225	221	187	202
K5_a	K5	272	272	135	141	159	159	225	234	284	288	274	278	237	237	285	282	258	260	200	200	380	383	271	280	150	156	293	299	332	332	246	252	344	347	290	290	200	197	316	316	278	282	270	274	228	221	187	202
K5_b	K5	272	272	135	141	159	159	225	234	288	292	278	282	237	237	285	282	258	260	200	200	380	383	271	280	150	156	293	299	332	332	246	252	344	347	290	290	200	200	316	328	278	284	270	274	228	221	187	202
K5_c	K5	272	275	135	141	159	159	225	234	288	292	278	282	237	237	285	282	258	260	200	200	380	383	271	280	150	156	293	299	332	332	246	252	344	350	290	290	200	200	316	328	278	284	270	274	228	221	187	202
K5_d	K5	272	275	135	141	159	159	225	234	288	292	278	282	237	237	285	282	260	260	200	200	380	383	271	280	150	156	293	299	332	332	246	246	344	350	290	290	200	200	316	328	278	284	270	274	228	221	187	202
K6_a	K6	272	275	135	143	159	156	225	234	280	276	270	270	237	233	285	282	260	260	200	200	380	383	271	280	153	162	296	299	326	338	246	252	344	350	290	290	200	197	316	328	278	282	270	274	228	228	187	202
K6_b	K6	272	275	135	143	159	159	225	231	280	284	270	274	237	237	285	282	260	260	200	200	380	383	271	280	153	162	296	299	332	350	246	252	344	350	290	290	200	197	316	328	278	278	270	274	225	221	187	202
K6_c	K6	272	275	135	143	159	159	225	234	280	276	270	266	237	233	285	282	260	260	200	200	380	383	271	280	153	162	296	299	326	338	246	240	338	344	290	290	200	197	316	328	278	282	270	274	225	221	187	202
K7_a	K7	272	275	135	135	159	156	225	234	280	276	270	266	237	237	285	279	260	260	200	200	380	383	271	280	153	162	296	299	326	350	246	252	344	350	290	290	200	197	316	328	278	274	270	274	225	219	187	199
K7_b	K7	272	275	135	135	159	156	225	231	280	276	270	266	237	237	285	279	260	260	200	200	380	383	271	280	150	156	296	299	326	344	246	252	344	350	290	290	200	197	316	316	278	278	266	274	225	219	187	202
K7_c	K7	272	275	135	135	159	156	225	234	280	276	266	266	237	237	285	279	260	260	200	200	383	386	271	280	153	162	296	299	332	332	246	252	344	350	290	290	200	197	316	316	278	274	270	274	225	219	102	202
K8_a	K8	272	278	135	135	159	162	225	234	280	276	270	266	237	237	285	282	258	260	200	200	380	383	271	280	150	156	296	299	332	350	246	252	344	350	290	290	200	197	316	328	278	278	270	274	225	221	187	202
K8_b	K8	272	278	132	138	159	162	228	231	280	284	270	274	237	233	282	282	258	262	200	200	380	383	271	280	150	156	296	296	332	350	246	252	344	350	290	290	200	197	316	328	278	278	270	274	225	219	187	202
K8_c	K8	272	278	135	135	159	159	225	228	280	280	270	270	237	233	282	285	258	260	200	200	380	383	272	280	150	150	296	296	332	350	246	252	344	350	290	290	200	197	316	316	278	278	270	274	225	219	187	190
A1_a	A1	272	272	135	141	159	156	225	231	280	276	270	278	237	237	285	282	260	260	200	200	380	380	271	271	150	150	296	296	332	332	246	240	338	344	290	298	244	244	316	322	278	282	270	274	225	221	187	187
A1_b	A1	272	272	135	141	159	159	231	231	280	280	270	278	237	233	282	282	258	260	200	200	380	383	271	280	150	150	296	296	332	332	246	252	338	350	290	298	244	244	316	328	278	278	270	274	225	221	187	187
A1_c	A1	272	272	135	139	159	156	225	231	280	284	270	280	237	237	285	279	258	260	200	200	380	383	271	280	147	156	296	296	332	350	246	252	344	347	290	290	244	250	316	328	278	282	270	274	225	221	187	187
A1_d	A1	272	272	135	141	159	159	225	234	280	276	270	296	237	233	285	282	260	260	200	200	380	383	271	280	150	150	299	302	332	332	246	252	344	347	290	290	205	214	316	328	278	284	270	274	225	221	187	187
A1_e	A1	272	281	135	143	159	159	225	234	280	276	270	290	237	233	285	282	258	262	200	200	383	386	271	280	150	150	296	296	332	332	246	252	338	344	290	290	205	214	316	328	278	274	270	274	225	221	187	187
A2_a	A2	272	281	135	135	159	159	231	231	280	280	270	270	237	233	282	282	258	260	200	200	380	380	271	271	150	150	296	296	332	332	246	252	344	344	290	290	244	244	322	322	240	240	270	274	221	221	187	187
A2_b	A2	272	272	135	145	159	159	231	231	280	280	270	270	237	237	282	282	258	260	200	200	380	380	271	271	150	150	296	296	332	332	246	252	344	344	290	290	244	244	319	319	240	240	270	274	221	221	184	184
A2_c	A2	272	272	135	135	159	159	231	231	280	280	270	270	237	237	282	282	258	260	200	200	380	380	271	271	150	150	296	296	332	332	246	252	344	344	290	290	244	244	322	322	240	240	266	274	221	221	187	187
A2_d	A2	272	272	135	135	159	159	231	231	280	280	270	270	237	237	282	282	258	260	200	200	380	380	271	271	150	150	296	296	332	332	246	252	344	344	290	290	244	244	322	322	240	240	270	270	221	221	187	187
A3_a	A3	272	272	135	144	159	159	231	231	280	280	270	270	237	237	282	282	258	260	200	200	380	380	271	271	150	150	296	296	332	350	246	252	344	344	290	298	244	244	319	322	240	240	270	270	221	221	187	187
A3_b	A3	272	272	135	135	159	159	231	231	280	280	270	270	237	237	282	282	258	258	200	200	380	380	271	271	150	150	299	302	332	332	246	252	344	344	290	290	244	250	322	322	240	240	270	270	221	221	187	187
A3_c	A3	272	272	135	135	159	162	231	231	280	280	270	270	237	237	282	282	258	260	200	200	380	380	271	271	150	150	299	302	332	332	246	252	344	344	290	290	244	250	322	322	240	240	270	270	221	221	187	187
A3_d	A3	272	272	135	135	159	159	231	231	280	280	270	270	237	237	282	282	258	260	200	200	380	380	271	271	153	153	296	299	332	332	246	252	344	344	290	290	244	250	322	322	240	240	270	270	221	221	187	187
A4_a	A4	272	272	135	135	159	159	231	231	280	280	270	270	237	237	282	282	258	260	200	200	380	380	271	271	153	153	296	299	332	332	246	252	344	344	290	290	244	250	322	322	240	240	270	270	225	221	187	187
A4_b	A4	272	272	135	144	159	159	231	231	280	284	270	274	237	237	282	282	258	260	200	200	380	380	271	271	150	150	296	296	332	332	246	252	344	344	290	290	244	250	322	322	278	240	270	270	225	221	187	202
A4_c	A4	272	275	135	135	159	159	231	231	9	9	270	270	237	237	282	282	258	258	200	200	380	380	271	271	150	150	296	296	326	326	246	252	344	344	290	290	205	214	322	322	240	240	270	270	225	221	190	190
A4_d	A4	272	275	135	126	159	159	225	231	280	288	270	270	237	237	282	285	258	262	200	200	380	380	271	271	147	147	296	299	332	350	246	252	344	350	290	298	205	214	316	328	278	278	270	270	225	221	190	190
A5_a	A5	272	275	135	135	159	159	231	231	280	280	270	274	237	233	282	282	260	260	200	200	380	380	271	271	150	150	296	299	326	326	246	252	344	344	290	290	205	214	322	322	240	240	270	270	225	221	187	187
A5_b	A5	272	275	135	144	159	159	231	231	280	284	270	270	237	233	282	282	258	260	200	200	380	380	271	271	153	153	296	296	332	332	246	252	344	344	290	290	205	214	322	322	240	278	270	270	225	221	187	190
A5_c	A5	272	275	135	135	159	162	231	231	280	280	270	274	237	237	282	282	258	260	200	200	380	380	271	271	153	153	296	296	332	332	246	252	344	344	290	290	205	214	322	322	240	240	270	270	225	221	187	190
A5_d	A5	272	275	135	132	159	153	228	231	280	284	270	274	237	233	282	285	260	262	200	200	380	380	271	271	150	150	296	296	332	332	246	252	344	350	290	290	205	214	316	328	278	282	270	270	225	221	187	190
A6_a	A6	272	272	135	132	159	153	228	231	280	280	270	270	237	233	282	285	260	262	200	200	380	380	271	271	150	150	296	296	332	332	246	252	344	350	294	294	205	214	316	328	278	282	270	270	225	221	187	202
A6_b	A6	272	272	135	135	159	159	231	231	280	280	270	270	237	233	282	282	258	260	200	200	380	380	271	271	150	150	296	296	326	326	246	252	344	344	290	290	205	214	322	322	240	240	270	270	225	221	187	187
A6_c	A6	272	272	135	135	159	159	9	9	280	280	270	270	237	237	282	282	258	258	200	200	380	380	271	271	147	153	296	296	9	9	246	252	344	344	290	290	205	214	9	9	240	240	270	270	225	221	187	187
A6_d	A6	272	272	9	9	159	162	231	231	280	280	270	270	237	233	282	282	258	258	200	200	380	380	271	271	9	9	9	9	326	350	246	252	344	344	290	298	205	214	322	322	278	240	270	270	221	221	187	190
A7_a	A7	272	275	132	138	159	162	228	231	280	284	270	274	9	9	282	285	258	262	200	200	380	383	271	271	147	153	9	9	9	9	246	252	344	350	298	298	244	244	316	328	278	278	270	270	225	221	187	190
A7_b	A7	272	272	135	135	159	159	225	228	276	276	270	270	237	233	282	282	260	262	200	200	380	380	271	271	150	150	296	296	332	332	9	9	344	344	290	290	244	244	322	328	278	240	270	270	221	221	187	187
A7_c	A7	272	272	135	138	159	156	225	228	280	280	274	274	237	229	282	285	260	260	200	200	380	383	271	271	150	150	296	296	332	344	252	252	344	344	290	294	244	244	316	328	278	240	270	270	225	221	187	190
A7_d	A7	272	272	135	138	159	156	234	228	280	280	274	274	237	233	282	285	260	260	200	200	380	383	271	271	150	150	296	296	332	344	252	252	344	344	290	294	244	244	316	328	278	240	270	270	225	221	187	190
[truncated: 66 more columns]
