# Supplementary material for: Contrasting Reproductive Strategies of Two Nymphaea Species Affect Existing Natural Genetic Diversity as Assessed by Microsatellite Markers: Implications for Conservation and Wetlands Restoration
Source: Front Plant Sci. 2022 Mar 9;13:773572. doi: 10.3389/fpls.2022.773572 (PMC8965595; doi:10.3389/fpls.2022.773572)
Supplement: Supplementary Table 1 — Details of 260 SSR primers (217 non-genic + 43 genic) designed in present study. [file Table_1.XLSX]

## Sheet: Sheet1
Supplementary Table 1: Details of 260 SSR primers (217 non-genic + 43 genic) designed in present study.
Locus	Sequence ID	Repeat motif	Forward primer sequence (5’-3’)	Reverse primer sequence (5’-3’)	SSR length
Nym_NGS1	NODE_131741_length_1450_cov_4.365517	(CCA)10	CAGAAGGTTTTCCCTCCTC	TCCCAAAACGCCTATCTCTG	30
Nym_NGS2	NODE_680868_length_1010_cov_5.891089	(TCT)9	GCCATCGTCCTGTTTTCAC	GGACACAGACACAGTTGGAGAG	27
Nym_NGS3	NODE_299618_length_1363_cov_5.123991	(CTT)13	GTTTGGGTTCACCTGGCTTG	ACCGTGCCATTCTGGGAGAG	39
Nym_NGS4	NODE_778591_length_1234_cov_4.861426	(AAG)8	GGGAGAGCGAGAGAGAGAGC	GCGAGATCCCAACGAAAGAG	24
Nym_NGS5	NODE_165057_length_2013_cov_5.285147	(ATT)13	TGCCAACTAACCAACACCTC	GCAAATGGAAGACCCCTCTC	39
Nym_NGS6	NODE_397660_length_1558_cov_4.944159	(GAA)11	CGAGAGGAGAAGGCAGTGAC	CCCAAAACGCAGCATACC	33
Nym_NGS7	NODE_1095323_length_970_cov_3.017526	(TA)8	TCGCATACCCTGAAAGGAAC	CTACCCATCTGTGCCCTACC	16
Nym_NGS8	NODE_765596_length_1613_cov_5.239925	(AAG)10	AGGGTGAGCGTAGCAGAAAG	GCACCACCAAAGGAAACTG	30
Nym_NGS9	NODE_232778_length_3829_cov_5.126404	(AAAAG)6	ATGTACCAACACTCTGCTCACC	CAACCAATGCTCTTGACACC	30
Nym_NGS10	NODE_627761_length_1080_cov_3.408333	(TTC)13	ATCTCCCTCACCTCTCCTCTTC	CCAGGAGGAAGGTGAGGAAG	39
Nym_NGS11	NODE_545472_length_967_cov_4.724923	(GAA)10	CCTAAACCTCCACCCACTTG	GCTTTCAATACCCTCCTCTCC	30
Nym_NGS12	NODE_64495_length_1923_cov_4.704108	(A)10	TGTGCTCCCACTCTATCTTTG	GCTGATGATAACGACGAAGATG	10
Nym_NGS13	NODE_17354_length_3487_cov_5.137367	(GAA)12	CTCTCGGTTCACAACTTCTTCC	CAAGTGTTCGGTGGGTGATG	36
Nym_NGS14	NODE_435263_length_3343_cov_5.276399	(ATT)11	AGAAGGGGAAGAAGAAGACG	AGCAATCGTGGTCAAGGTG	33
Nym_NGS15	NODE_1028018_length_1046_cov_4.213193	(GAA)11	ATTGTTTTGGGGTCAAAGTGG	TCGTGCCTTCTCTAACTCTTCC	33
Nym_NGS16	NODE_734722_length_1636_cov_4.680318	(ATG)9	GCAGAATCAGAAGAAGAGGAAG	GTTTTGGGCATCAAGTTCTCC	27
Nym_NGS17	NODE_67711_length_952_cov_4.029412	(TCT)13	GGGATAGGAGGATGGGCAAG	CGACCTCTTTTTCTGTGTTGC	39
Nym_NGS18	NODE_567380_length_1846_cov_4.907909	(TA)14	TGACAAACTATCACCGCACAC	CATTTACCAGCATCGCTACAAG	28
Nym_NGS19	NODE_30449_length_967_cov_4.631851	(AT)19	CAGCCCAAACCCCATAAC	GCTGCCATAGGTTGTGTCC	38
Nym_NGS20	NODE_355899_length_2860_cov_4.398951	(TA)14	GGCAGGAAGAAGGGAAAAG	ACAGTACAGCCGTCAGCATC	28
Nym_NGS21	NODE_240_length_2007_cov_5.574987	(TC)10	CATCCAAACATGCCCATAGA	GACACTGTTCACAATCCAAGAC	20
Nym_NGS22	NODE_413_length_2117_cov_3.886160	(TA)10	GAGAATGCCTACCCCTTCCT	TGGCTGGTAGAGGCCCTA	20
Nym_NGS23	NODE_456_length_2435_cov_4.121150	(AG)12	GGACACAAGGAAGGCCTGTA	TGCTGTCTCCTGTGAACGTC	24
Nym_NGS24	NODE_952_length_1561_cov_4.441384	(TC)11	AGGGAAAGACGGAAGCTCAT	AGGATCTTCGGATAGCAGC	22
Nym_NGS25	NODE_953_length_1170_cov_4.541026	(GA)13	GTGGTGATTCTGTTGTGG	TCTTTCCTTTCTCCACCG	26
Nym_NGS26	NODE_972_length_1942_cov_5.018538	(AC)14	CAGGTTGAGTCAGTTGAC	GGCACCAGAGTATGGATAG	28
Nym_NGS27	NODE_1032_length_1720_cov_4.433139	(TA)6	GCCTTGCTGATGAAAGACTC	GGACGAGGTCAAGAATTCC	12
Nym_NGS28	NODE_240_length_2007_cov_5.574987	(TC)10	TCATCCAAACATGCCCATAG	CACAATCCAAGACTGCACTT	20
Nym_NGS29	NODE_1115_length_2280_cov_4.413597	(TC)14	GATCAATCTGCGGTTGCC	TGCCATTCGTTCCACCAG	28
Nym_NGS30	NODE_1189_length_3365_cov_4.826449	(GT)6	TAGGCTGGGCACCTGAAAG	GCAGCTTGGGGTGTTGATTG	12
Nym_NGS31	NODE_1431_length_1338_cov_4.331839	(AG)10	GTGCATCTTATCTGGGAGC	GGAAGTGGAAGTGCATAGG	20
Nym_NGS32	NODE_1445_length_1478_cov_4.979026	(GA)12	GGAAGGAACAGAACAGCAG	GAAACGCGTTCAGTTGATGG	24
Nym_NGS33	NODE_952_length_1561_cov_4.441384	(T)10	GTTGAGGCACCACCAAACTC	TCTTCAACCGGAGACGGA	10
Nym_NGS34	NODE_3768_length_3671_cov_5.034595	(AG)23	CTCGTGCACATACAAAGTC	AATGCTTGGGAGATGATGG	46
Nym_NGS35	NODE_10364_length_1030_cov_5.835922	(TC)16	CCTGAGAGATCCATTCGAG	TCTGGTGATGGTGATGAG	32
Nym_NGS36	NODE_1470064_length_1267_cov_4.721389	(TCT)7	GGCTCAAGCAAGTTCTACC	GGAAATAAGAGGGAGACGG	21
Nym_NGS37	NODE_1468_length_1170_cov_4.558120	(T)11	CGCCGGAATATCTCAACC	GTGAGTTCGGCGGTTCAA	11
Nym_NGS38	NODE_1776_length_1999_cov_4.464732	(TA)6	ACTGTTCGCCCTTGTACG	CAAGACTAAAGCGCTTCCG	12
Nym_NGS39	NODE_1818_length_1587_cov_4.793951	(AG)18	ACTTGATAGGCGTGTACG	GGCTCGATACGCAAGATT	36
Nym_NGS40	NODE_36505_length_1774_cov_5.164600	(CAC)7	TCTCTCGCTGTCCGTATTCC	TCCTGAACACCCACACTCC	21
Nym_NGS41	NODE_1189_length_3365_cov_4.826449	(CGA)8	TAGGCTGGGCACCTGAAA	GTGTTGGCTCGAGTTTGAC	24
Nym_NGS42	NODE_2186_length_2255_cov_4.710421	(AG)11	GGACCTCTATGAAGGACTTC	CTGGCATCAGAAGGTTGG	22
Nym_NGS43	NODE_2788_length_1529_cov_3.533682	(TA)14	GATGTTGGACTTAACCAGC	GAACGGAACTCCAAATGG	28
Nym_NGS44	NODE_240_length_2007_cov_5.574987	(TC)10	CATCCAAACATGCCCATAAG	AATCCAAGACTGCACTTC	20
Nym_NGS45	NODE_1213498_length_1338_cov_4.584455	(GCT)6	GGGCGAAAGTGAAAGAGG	AGTGAGGGCAATGGAAAGG	18
Nym_NGS46	NODE_995839_length_1249_cov_5.105685	(TAA)6	CCCGATACCTGTTACCTG	CCACACTCTTTCTCCTCG	18
Nym_NGS47	NODE_2866_length_1687_cov_4.664493	(AG)20	CCAATCTTGTCAGTAGAAGC	CATGGTTGATGTCTATGCTC	40
Nym_NGS48	NODE_2988_length_2847_cov_4.664910	(TA)11	TGCGTGCCCTGTAAACAGAG	CTTCATTGGTGAGGAAGGCCT	22
Nym_NGS49	NODE_2998_length_2114_cov_5.428098	(TA)11	TGCATAAAAGCGTGTGTGTG	CATCACTCATTCGATTCCC	22
Nym_NGS50	NODE_3752_length_1493_cov_4.430007	(AT)14	CTCCTGTGATTTCCACCTC	AGGGAATATGGTCTCGCG	28
Nym_NGS51	NODE_33211_length_1247_cov_4.206897	(GCGACG)5	CCATCTCTCCTCCACCTTTG	ACGCCAAGATTGTCCTCCT	30
Nym_NGS52	NODE_3783_length_1710_cov_4.356725	(AG)13	GACTCATTCTTTGCCATCG	GATGGATCAAGACCTCATG	26
Nym_NGS53	NODE_100516_length_1341_cov_3.866518	(CACCGG)5	CCTTCCTTCCTCTTCCAG	CCAGGGGGATCAGGTTATTC	30
Nym_NGS54	NODE_443228_length_3112_cov_5.118573	(TGGGCG)5	CCCACCACAATCCACCTATC	CCCACCACAATCCACCTATC	30
Nym_NGS55	NODE_1521753_length_1024_cov_4.464844	(GA)14	AGCATCTACCCGCTCGTAAC	CTCCCTCGTTGCTGCTATTC	28
Nym_NGS56	NODE_4450_length_1795_cov_5.865738	(AG)11	GGTTCTTCTTTGTGTTTCCC	AATGTCAACATCTGGGTGC	22
Nym_NGS57	NODE_4496_length_1481_cov_5.072924	(CT)8(CA)7	ACACTTCCTTGCTCCTCC	GTTGACGATCTGTTCTGCG	30
Nym_NGS58	NODE_4500_length_2827_cov_5.147506	(AT)7	CTTTGCCTCTTCCTCCTTC	CAAACATTGACCTTGCCG	14
Nym_NGS59	NODE_4756_length_2022_cov_4.649357	(GA)11	GGTCCTACATTCGTCACACT	GTGCCACTCTTGAATCAGG	22
Nym_NGS60	NODE_4836_length_1921_cov_4.981260	(TA)10	GGATGTCTGGTCTGTTGA	GGGTGCAGATACAAATCC	20
Nym_NGS61	NODE_1499851_length_957_cov_4.725183	(TTC)5	CTGCGGAGATTGCTCTTC	CTGCGGAGATTGCTCTTC	15
Nym_NGS62	NODE_1481724_length_991_cov_4.812311	(TC)13	GAAACCTGCTTCCGAGTG	GGGTTTCCTCTCAAGTCG	26
Nym_NGS63	NODE_1450588_length_1107_cov_4.714544	(AG)12	CAGAACTCACCACAACACC	GGCTTTGAACAACCTGACC	24
Nym_NGS64	NODE_1444451_length_1310_cov_5.147328	(TC)15	CCATCTTGCGTCCTCTCTTC	TTAGAGCGGTGGATGGAG	30
Nym_NGS65	NODE_1621_length_1096_cov_4.444343	(T)13	AGCGATGTGTTGGGTTGC	AACTGGTTCAAGCCTCTGC	13
Nym_NGS66	NODE_4996_length_1788_cov_5.074944	(AT)16	CTTAGACAGCCATGGACG	CCAAGTGTGCAAGTAAGCC	32
Nym_NGS67	NODE_5003_length_1400_cov_5.423572	(CT)12	CCCAAACTATCAAACACAGGC	AATTCAGGCGAAGTGACAC	24
Nym_NGS68	NODE_5804_length_978_cov_4.900818	(TA)13	CACACAATCAATGACGTCTC	CATGCATCCTCATCAGATC	26
Nym_NGS69	NODE_6194_length_1120_cov_4.068750	(CT)11	GTGATCCGGTCATTTGCC	TGCTCCACAGCAGCAATG	22
Nym_NGS70	NODE_24875_length_1274_cov_4.427786	(CCT)8	GTTTCCTTGGACCTGTCTCG	AGACCGTCAACATCCTGG	24
Nym_NGS71	NODE_1298982_length_1048_cov_4.486641	(AT)7	GCCGAGTCAAACATCTGTCC	CTTCCAAGTCCCAACCTCC	14
Nym_NGS72	NODE_1213498_length_1338_cov_4.584455	(GCT)6	GGGCGAAAGTGAAAGAGG	AGTGAGGGCAATGGAAAGG	18
Nym_NGS73	NODE_6395_length_1019_cov_4.629048	(AT)10	CATGGATTTCTAGCCCACC	GTTTATGGTTGGAGGTGCC	20
Nym_NGS74	NODE_6431_length_1230_cov_4.745528	(AC)12	CAATGGAGGAACTGTTAGC	GATACCTGTCTGCATCGTA	24
Nym_NGS75	NODE_1140426_length_1159_cov_4.592752	(CTT)7	TTCCCACCTTCCTTCTTCC	GAACACCCTTTCCTGTCTTCC	21
Nym_NGS76	NODE_851659_length_2064_cov_4.555233	(TCT)6	GAAGAGGGCAGAGAATGG	TGAAGGCGGGAGTGTAAGAG	18
Nym_NGS77	NODE_104057_length_1051_cov_4.761180	(ACAA)5	CCTGCCAGTTTGCTGTTTC	ACCTCAGCACCCTTCTGTTC	20
Nym_NGS78	NODE_6569_length_1779_cov_5.278246	(AG)15	GAGCAGAGAAGGAATGTGC	CTCCCTTCCTTCGTTGAAAC	30
Nym_NGS79	NODE_6664_length_1757_cov_5.191235	(TC)11	GATCGACGGCTACTGGTGTT	GGTGCATCACGCATCACAC	22
Nym_NGS80	NODE_8431_length_1736_cov_4.739631	(AG)9	CAATTCTGGGTCTCTTTAGGG	CACCACCAACAAGTTATCGAG	18
Nym_NGS81	NODE_9475_length_2361_cov_8.832274	(AT)15	GTTGGCATCTGTTATTCCAC	ACACACCCACATTGACACT	30
Nym_NGS82	NODE_109313_length_1062_cov_4.483051	(TA)14	TCCGTCCTTGCTAACCTG	CCTCAATGTGCTTCCTCACC	28
Nym_NGS83	NODE_82187_length_1274_cov_4.839874	(GCAGAT)5	TATTCTGTTCACCCCGTCC	GGCTGGCTGATTTAGTGGAG	30
Nym_NGS84	NODE_12159_length_2035_cov_3.804914	(TA)14	GGCACTGACTACAAGAAATG	CTTCCACCATCCATATGC	28
Nym_NGS85	NODE_12882_length_1352_cov_4.174556	(TC)11	CGATGTTGAAACCAAGCACTTAG	TCGTGGATTCCTTCAGTCTA	22
Nym_NGS86	NODE_13857_length_1289_cov_5.082234	(AT)13	CATCTTGTATGGAACACCCG	TCATCACCATCGTGGGTCT	26
Nym_NGS87	NODE_13857_length_1289_cov_5.082234	(AT)13	TAGTTTCTCTTGCCCGTCT	CTTGTGGAGTGTGGAAATTG	26
Nym_NGS88	NODE_15691_length_2366_cov_4.738377	(GA)14	CGTCAGTGCTTCAGTTGTTG	GGGACGATTGATGTTGGAA	28
Nym_NGS89	NODE_15965_length_1068_cov_4.099251	(TA)13	TGACTTCAAAGCACAGGTTG	GTTTGGTGAGACGAGAAAGGA	26
Nym_NGS90	NODE_334907_length_1157_cov_4.929991	(AAATCC)5	CCGATACGAACACGAACCAC	AGGCATCCACCTCCTCTTCT	30
Nym_NGS91	NODE_381614_length_1252_cov_4.925719	(GAAAGA)5	CGATCCGTCCACAAGTTAGC	CAACAAGGCACGAAGCACT	30
Nym_NGS92	NODE_9603_length_1004_cov_4.077689	(TC)9	CGTTAAAGCCGTGCATCTC	CGAGTTGGGATACTTCAGGCT	18
Nym_NGS93	NODE_16446_length_1424_cov_3.519663	(AT)14	ACCAAGCATAGCTCTTTG	AAGGCTGTCTCATCTCAC	28
Nym_NGS94	NODE_443228_length_3112_cov_5.118573	(TGGGCG)5	CCCACCACAATCCACCTATC	CCCCTCTTATGCCACAACAC	30
Nym_NGS95	NODE_1189_length_3365_cov_4.826449	(A)10	GACTGCGATGACTGTGAGG	TACACCGACACAGTTGAGG	10
Nym_NGS96	NODE_1621_length_1096_cov_4.444343	(T)13	AGCGATGTGTTGGGTTGC	AACTGGTTCAAGCCTCTGC	13
Nym_NGS97	NODE_3609_length_1683_cov_4.166964	(T)11	GCATTGAGATGAAGGCACC	TGCCCAGAACTACAACAGG	11
Nym_NGS98	NODE_4634_length_1311_cov_5.376812	(AAT)9	GGGTACTGATGAGCAACG	CCATTTTGCCAGACCTACC	27
Nym_NGS99	NODE_5565_length_2868_cov_5.578801	(TCT)7	GCACCTCGTAGAAGCAAACC	CATAAGTAGCGGAATGGCG	21
Nym_NGS100	NODE_17776_length_1262_cov_17.055468	(AGA)7	TTGGACTTGGCTCTTGTGG	GCATCCAACAGCAACAGC	21
Nym_NGS101	NODE_20080_length_2407_cov_4.929373	(AAG)8	TGGAAGAGCAGATCGTTGG	AGGAAATGGACGACAGCC	24
Nym_NGS102	NODE_20080_length_2407_cov_4.929373	(AAG)8	GTGGAAGAGCAGATCGTTGG	AGGAAATGGACGACAGCC	24
Nym_NGS103	NODE_20924_length_1347_cov_4.723088	(AAT)6	CAGATGCTGTTCCCTTCTCG	CAGATGCTGTTCCCTTCTCG	18
Nym_NGS104	NODE_21331_length_2749_cov_4.764278	(CAG)7	AACCAGCAGGAGAGTTGTCG	GACAATCTTGGTGGGTCC	21
Nym_NGS105	NODE_24875_length_1274_cov_4.427786	(CCT)8	GTTTCCTTGGACCTGTCTCG	AGACCGTCAACATCCTGG	24
Nym_NGS106	NODE_36171_length_1651_cov_4.919443	(AAT)6	GTGTGAGCAAGAGAGTAGG	GTCTGACTGGTTTGGAAGG	18
Nym_NGS107	NODE_40214_length_4211_cov_4.966041	(TAA)6	TTTGCCAGCACCTAACAGC	GAAGGCGTGGAAGAAAGAGC	18
Nym_NGS108	NODE_47007_length_2603_cov_4.756435	(AAG)8	CTCCTTCAGCAATCGTCC	GACAGCCATCTTCTCCTGC	24
Nym_NGS109	NODE_47007_length_2603_cov_4.756435	(AAG)8	CTCCTTCAGCAATCGTCC	AGGAGAAACCGAAGGTAGGG	24
Nym_NGS110	NODE_56507_length_1256_cov_4.264331	(CTC)8	CATTCCAACTCCTGCTCTCC	AGCAGCAAGAAGTGGAGG	24
Nym_NGS111	NODE_56650_length_3275_cov_9.234809	(CTT)6	CTTCCTCCCTTCTTCAACC	CGACCACCAAATGAGACG	18
Nym_NGS112	NODE_57963_length_1193_cov_4.777871	(CGG)6	CACCTGCCTTTGTGAACC	GGAGTTCCTGGTTGTTGC	18
Nym_NGS113	NODE_62600_length_1535_cov_4.984365	(ACG)7	GAGAACGAGGATGACTTGC	CAGAGAACAAGGTGGTGG	21
Nym_NGS114	NODE_1333229_length_1481_cov_4.297772	(ATA)8	TATTACCGCCACCAGACTCC	CACACAGATTCGTGGACAGG	24
Nym_NGS115	NODE_1298982_length_1048_cov_4.486641	(AT)7	GCCGAGTCAAACATCTGTCC	CTTCCAAGTCCCAACCTCC	14
Nym_NGS116	NODE_1140426_length_1159_cov_4.592752	(CTT)7	TTCCCACCTTCCTTCTTCC	GAACACCCTTTCCTGTCTTCC	21
Nym_NGS117	NODE_316820_length_1118_cov_4.964222	(AT)7(GT)17	GTGGTCACATCTCTTGCTCC	CTTCTCCCTTGGGTATGAGC	48
Nym_NGS118	NODE_1033377_length_1336_cov_4.767964	(A)10	ATCTGCTGGAGGAGTTCTGC	GGAGAGTGGAGTGAGATTGG	10
Nym_NGS119	NODE_1018514_length_2175_cov_4.175172	(AG)6	CAGCATCACTCTGCCTCTTG	CCACGCTGATTCTCTTCTCC	12
Nym_NGS120	NODE_1010510_length_1220_cov_4.689344	(GTG)6	TCCGAGATGAACCCGAAC	TCTCGTCATCCTCCTTCCTG	18
Nym_NGS121	NODE_1006487_length_1601_cov_4.629607	(T)10	GCCTCTCCTGTCAACTTTC	GTTTCCCACCGCATCTTTC	10
Nym_NGS122	NODE_957478_length_1680_cov_4.247619	(AAG)6	TGAGAAGACCCAAGGAGAGG	TGTGAGGGATGGAGAGAGAG	18
Nym_NGS123	NODE_954517_length_1667_cov_5.162568	(TGC)7	TTGGTAGTGGAGACGGAAGC	TGGTCACTACAAACCTCCC	21
Nym_NGS124	NODE_219090_length_2595_cov_5.019268	(AG)7	TTTCCTACCTCCACCACCAC	GGTATCTCGGCTTTCAGTGG	14
Nym_NGS125	NODE_915935_length_1036_cov_4.226834	(ATGATC)5	GAAGCGACAAGCAATGGC	GCAGTGCCTTGAGATGACA	30
Nym_NGS126	NODE_799561_length_1668_cov_4.519185	(TATGTA)5	ACCGTCTTCTTCCTTTCC	TGTCTTGATGAAGTCGCC	30
Nym_NGS127	NODE_609774_length_983_cov_3.819939	(GA)8	CCCCAGGAGAAAAACACC	CACCGCTTGGAGTGAACT	16
Nym_NGS128	NODE_586606_length_2059_cov_4.902865	(AAAACA)5	GTGAGAGGGAGCATTGGAAC	GGAGGACAAGGAAACTCAGG	30
Nym_NGS129	NODE_559450_length_1261_cov_5.340206	(GGTTGC)5	GTTTGGAACACTGCGGAG	AATGGTGGTGAAGAGCAGG	30
Nym_NGS130	NODE_536285_length_1716_cov_4.138112	(A)10	CCTCTTGTGGACTGTGGA	GCACATTCACAAGGACGG	10
Nym_NGS131	NODE_529738_length_1219_cov_5.232978	(AT)6	TGTCCCTCCTCCACAAAC	CTACAATGGGGTCGTCAAG	12
Nym_NGS132	NODE_447772_length_1329_cov_4.227239	(ACAGAG)5	ACTGCTGATGAGCCGACCT	ACTGCTGATGAGCCGACCT	30
Nym_NGS133	NODE_82187_length_1274_cov_4.839874	(GCAGAT)5	TATTCTGTTCACCCCGTCC	GGCTGGCTGATTTAGTGGAG	30
Nym_NGS134	NODE_160810_length_1666_cov_5.552221	(GCCGGA)5	CTGACCGCCTCACCATTA	ACTTTGCTCCTTGTCGCC	30
Nym_NGS135	NODE_229035_length_1857_cov_4.849758	(TCTTTC)5	ACCTGGCGAGTGGAAAGAA	ACCTGGCGAGTGGAAAGAA	30
Nym_NGS136	NODE_253096_length_2092_cov_4.662524	(TGACTG)5	CCTCTGCTAACTCCCTTCCA	CTGCTAACTGGGACGAGGAA	30
Nym_NGS137	NODE_257426_length_1070_cov_6.166355	(TCTCTT)5	CCTATTCCCAGGACAAGC	CCTGAGGCAGACAAGAAGTG	30
Nym_NGS138	NODE_334907_length_1157_cov_4.929991	(AAATCC)5	CCGATACGAACACGAACCAC	AGGCATCCACCTCCTCTTCT	30
Nym_NGS139	NODE_381614_length_1252_cov_4.925719	(GAAAGA)5	CGATCCGTCCACAAGTTAGC	CAACAAGGCACGAAGCACT	30
Nym_NGS140	NODE_399312_length_1767_cov_5.246180	(ATCTGA)5	CGGTGATTAAGGCGGTTC	CGCTTCCTGCTCTTCCTTT	30
Nym_NGS141	NODE_1611117_length_1116_cov_3.992831	(CT)6	CAGTGGGAGAGGGAATAC	ATACAGGGACGAGGCAGAC	12
Nym_NGS142	NODE_1588517_length_982_cov_3.394094	(AG)10	CCAGGCAAGCAAAGTCTC	TTGTGCTCCAGGTGCTTG	20
Nym_NGS143	NODE_1498830_length_1173_cov_4.050298	(A)13	TGAGTTGTCCTGCTGAGTGG	TCAGGTCACCATCCCATC	13
Nym_NGS144	NODE_1481724_length_991_cov_4.812311	(TC)13	GACGACATTACGCCAACC	ATGTCTGTCTTCCCAGTGCC	26
Nym_NGS145	NODE_1444451_length_1310_cov_5.147328	(TC)15	CCATCTTGCGTCCTCTCTTC	TTAGAGCGGTGGATGGAG	30
Nym_NGS146	NODE_1432351_length_1844_cov_4.941432	(TA)11	AAGCCCTGTACCTTGTGC	TCTGTCTGTCGTGTGTGTCG	22
Nym_NGS147	NODE_220691_length_1082_cov_5.487985	(TA)6	TCTTAGGCGTTCCCAGATG	GCTGATTTGGTTCCCTTGC	12
Nym_NGS148	NODE_1412608_length_1224_cov_4.024510	(GA)10	CATCATACCGAACCGAGAGG	GCGACGGAGATACAGAAAGG	20
Nym_NGS149	NODE_1412258_length_1175_cov_4.053617	(TG)9	GTCTAATGGTCAGGCGGAAG	AGAGAGAGAGACAGCACAGG	18
Nym_NGS150	NODE_1390702_length_1259_cov_5.260524	(A)10	CGTCCTGGTATCGTTCTTCC	TGATGCTCGGAAGGTGTG	10
Nym_NGS151	NODE_1376245_length_1128_cov_5.086879	(TA)9	GTGGATGGAGGGAAAGAG	GATGGCTGGCAGTCCTTATG	18
Nym_NGS152	NODE_1354010_length_1202_cov_5.312812	(T)14	CCCTTGTCTTTCCTGTTCACC	CAACCACCAACTGAACTCC	14
Nym_NGS153	NODE_1349996_length_1295_cov_4.873359	(CA)9	GCTACTTGGTGGTGTGTTCC	TCGTCAGCCGTAAGAAGC	18
Nym_NGS154	NODE_1300900_length_1075_cov_4.722791	(CT)10	TTCCCTTCCCATTCTCTGC	CAGGCACTTGATCGGTTAG	20
Nym_NGS155	NODE_1298616_length_955_cov_5.002094	(GA)10	CAACGCAAACCCACCTTC	GTGGCACGAGACTTTCTTG	20
Nym_NGS156	NODE_1298484_length_1619_cov_5.331069	(TA)17	ACACTGGATTCCCTGGTG	AGAGGCGGGTTCTACCAATC	34
Nym_NGS157	NODE_1479338_length_1175_cov_4.329362	(AGC)7	GTGCAGCAACAAACAGGC	TCACAAGCCCTGCTGTTAGTC	21
Nym_NGS158	NODE_1470064_length_1267_cov_4.721389	(TCT)7	GGCTCAAGCAAGTTCTACC	GGAAATAAGAGGGAGACGG	21
Nym_NGS159	NODE_1189_length_3365_cov_4.826449	(A)10	GACTGCGATGACTGTGAGG	TACACCGACACAGTTGAGG	10
Nym_NGS160	NODE_3609_length_1683_cov_4.166964	(T)11	GCATTGAGATGAAGGCACC	TGCCCAGAACTACAACAGG	11
Nym_NGS161	NODE_4634_length_1311_cov_5.376812	(AAT)9	GGGTACTGATGAGCAACG	CCATTTTGCCAGACCTACC	27
Nym_NGS162	NODE_5565_length_2868_cov_5.578801	(TCT)7	GCACCTCGTAGAAGCAAACC	CATAAGTAGCGGAATGGCG	21
Nym_NGS163	NODE_17776_length_1262_cov_17.055468	(AGA)7	TTGGACTTGGCTCTTGTGG	GCATCCAACAGCAACAGC	21
Nym_NGS164	NODE_20080_length_2407_cov_4.929373	(AAG)8	TGGAAGAGCAGATCGTTGG	TGGAAGAGCAGATCGTTGG	24
Nym_NGS165	NODE_20080_length_2407_cov_4.929373	(AAG)8	TGGAAGAGCAGATCGTTGG	AGGAAATGGACGACAGCC	24
Nym_NGS166	NODE_20924_length_1347_cov_4.723088	(AAT)6	CAGATGCTGTTCCCTTCTCG	ACATTCAGTGGAGGGAGCG	18
Nym_NGS167	NODE_21331_length_2749_cov_4.764278	(CAG)7	AACCAGCAGGAGAGTTGTCG	GACAATCTTGGTGGGTCC	21
Nym_NGS168	NODE_36171_length_1651_cov_4.919443	(AAT)6	GTGTGAGCAAGAGAGTAGG	GTCTGACTGGTTTGGAAGG	18
Nym_NGS169	NODE_36505_length_1774_cov_5.164600	(CAC)7	TCTCTCGCTGTCCGTATTCC	TCCTGAACACCCACACTCC	21
Nym_NGS170	NODE_40214_length_4211_cov_4.966041	(TAA)6	TTTGCCAGCACCTAACAGC	GAAGGCGTGGAAGAAAGAGC	18
Nym_NGS171	NODE_47007_length_2603_cov_4.756435	(AAG)8	CTCCTTCAGCAATCGTCC	GACAGCCATCTTCTCCTGC	24
Nym_NGS172	NODE_47007_length_2603_cov_4.756435	(AAG)8	CTCCTTCAGCAATCGTCC	AGGAGAAACCGAAGGTAGGG	24
Nym_NGS173	NODE_56507_length_1256_cov_4.264331	(CTC)8	CATTCCAACTCCTGCTCTCC	AGCAGCAAGAAGTGGAGG	24
Nym_NGS174	NODE_56650_length_3275_cov_9.234809	(CTT)6	CTTCCTCCCTTCTTCAACC	CGACCACCAAATGAGACG	18
Nym_NGS175	NODE_57963_length_1193_cov_4.777871	(CGG)6	CACCTGCCTTTGTGAACC	GGAGTTCCTGGTTGTTGC	18
Nym_NGS176	NODE_62600_length_1535_cov_4.984365	(ACG)7	GAGAACGAGGATGACTTGC	CAGAGAACAAGGTGGTGG	21
Nym_NGS177	NODE_1333229_length_1481_cov_4.297772	(ATA)8	TATTACCGCCACCAGACTCC	CACACAGATTCGTGGACAGG	24
Nym_NGS178	NODE_316820_length_1118_cov_4.964222	(AT)7(GT)17	GTGGTCACATCTCTTGCTCC	CTTCTCCCTTGGGTATGAGC	48
Nym_NGS179	NODE_1033377_length_1336_cov_4.767964	(A)10	ATCTGCTGGAGGAGTTCTGC	GGAGAGTGGAGTGAGATTGG	10
Nym_NGS180	NODE_1018514_length_2175_cov_4.175172	(CCA)6	CAGCATCACTCTGCCTCTTG	CCACGCTGATTCTCTTCTCC	18
Nym_NGS181	NODE_1010510_length_1220_cov_4.689344	(GTG)6	TCCGAGATGAACCCGAAC	TCTCGTCATCCTCCTTCCTG	18
Nym_NGS182	NODE_1006487_length_1601_cov_4.629607	(T)10	GCCTCTCCTGTCAACTTTC	GTTTCCCACCGCATCTTTC	10
Nym_NGS183	NODE_995839_length_1249_cov_5.105685	(TAA)6	CCCGATACCTGTTACCTG	CCACACTCTTTCTCCTCG	18
Nym_NGS184	NODE_957478_length_1680_cov_4.247619	(AAG)6	TGAGAAGACCCAAGGAGAGG	TGTGAGGGATGGAGAGAGAG	18
Nym_NGS185	NODE_954517_length_1667_cov_5.162568	(TGC)7	TTGGTAGTGGAGACGGAAGC	TGGTCACTACAAACCTCCC	21
Nym_NGS186	NODE_950751_length_1178_cov_3.912564	(AT)21	CCTCATATCACCACCACC	CGTAAGCGTCAACTCGTC	42
Nym_NGS187	NODE_922453_length_1045_cov_5.065072	(AAT)8	GGGAGAGAGGAAAGCAAAGG	TGAGTCTGGACGCTGATG	24
Nym_NGS188	NODE_918889_length_1065_cov_4.567136	(TCT)6	GGTAGTCGTCCCGTTTTCC	TGCTGCTACCGAGAGACAG	18
Nym_NGS189	NODE_918085_length_985_cov_5.379695	(TG)9(AG)9	GTGTGTGTGTGTGTGTGAG	TGGCTCCACTCCTACTTG	36
Nym_NGS190	NODE_912114_length_1015_cov_5.173399	(TTC)8	TGATGCTCTCTGCTCTCTCC	ACCACCACCTTCTCCCTTTC	24
Nym_NGS191	NODE_894290_length_968_cov_4.873967	(CTT)7	TTGCTCTGCTTCCTCTCTCC	CTTCTTCTCTGGAGGTAGCC	21
Nym_NGS192	NODE_880040_length_1699_cov_4.477928	(CA)13	CATTGATGCCACCACTGTG	GATGCTGATGACTGCTACGG	26
Nym_NGS193	NODE_51690_length_2053_cov_5.657087	(TAAA)6	GCCACTACAAAGGCACACTG	TGGTGCTACAGGCTGATG	24
Nym_NGS194	NODE_102479_length_1427_cov_3.982481	(TAAT)5	ACGATTACGGACCGAAAGG	CTCCACACATTCCCATTCC	20
Nym_NGS195	NODE_103240_length_1566_cov_4.537675	(AATA)5	GTTATGCCCTTCCCATCTCC	ATTGAAGTGGACCGCCTC	20
Nym_NGS196	NODE_120181_length_1215_cov_5.106996	(AAAC)5	GATGGAGATGTGTCTGACC	TAGCCGCTGTTGTTGAACC	20
Nym_NGS197	NODE_158237_length_1106_cov_5.635624	(ATCA)5	GCTGACCACAGAAAGTGC	CTTCTCTTCACCTGGCTTGC	20
Nym_NGS198	NODE_170802_length_1310_cov_4.736641	(ATTA)6	AAATGTAGGTGCGGTGGTG	CGGACATTACTTGCCCGATAC	24
Nym_NGS199	NODE_227111_length_1428_cov_4.778011	(AAGG)5	ATCAGAGGGCAACAGAGACG	GCAGCAGTCCTTTCTGGTTC	20
Nym_NGS200	NODE_271516_length_1150_cov_5.845217	(TTTA)5	CGTTCCTCTCGTTTCGTC	GGAGAGTGAACACGGAAC	20
Nym_NGS201	NODE_292910_length_1816_cov_5.073238	(TATG)5	AGTGCCAGGAGAGAAACC	TGTTGTTGGGAACGAGGC	20
Nym_NGS202	NODE_1068161_length_1038_cov_5.019268	(CACGAC)5	TTTCCTACCTCCACCACCAC	GGTATCTCGGCTTTCAGTGG	30
Nym_NGS203	NODE_915935_length_1036_cov_4.226834	(ATGATC)5	GAAGCGACAAGCAATGGC	GCAGTGCCTTGAGATGACA	30
Nym_NGS204	NODE_799561_length_1668_cov_4.519185	(TATGTA)5	ACCGTCTTCTTCCTTTCC	TGTCTTGATGAAGTCGCC	30
Nym_NGS205	NODE_609774_length_983_cov_3.819939	(GA)8	CCCCAGGAGAAAAACACC	CACCGCTTGGAGTGAACT	16
Nym_NGS206	NODE_586606_length_2059_cov_4.902865	(AAAACA)5	GTGAGAGGGAGCATTGGAAC	GGAGGACAAGGAAACTCAGG	30
Nym_NGS207	NODE_559450_length_1261_cov_5.340206	(GGTTGC)5	GTTTGGAACACTGCGGAG	AATGGTGGTGAAGAGCAGG	30
Nym_NGS208	NODE_536285_length_1716_cov_4.138112	(A)10	CCTCTTGTGGACTGTGGA	GCACATTCACAAGGACGG	10
Nym_NGS209	NODE_529738_length_1219_cov_5.232978	(AT)6	TGTCCCTCCTCCACAAAC	CTACAATGGGGTCGTCAAG	12
Nym_NGS210	NODE_447772_length_1329_cov_4.227239	(ACAGAG)5	ACTGCTGATGAGCCGACCT	GCCAAGACCTGATGCCTAGA	30
Nym_NGS211	NODE_33211_length_1247_cov_4.206897	(GCGACG)5	CCATCTCTCCTCCACCTTTG	ACGCCAAGATTGTCCTCCT	30
Nym_NGS212	NODE_100516_length_1341_cov_3.866518	(A)10	CCTTCCTTCCTCTTCCAG	CCAGGGGGATCAGGTTATTC	10
Nym_NGS213	NODE_160810_length_1666_cov_5.552221	(GCCGGA)5	CTGACCGCCTCACCATTA	ACTTTGCTCCTTGTCGCC	30
Nym_NGS214	NODE_229035_length_1857_cov_4.849758	(AT)11	ACCTGGCGAGTGGAAAGAA	GAGAGTGTGAGGGGGAACAA	22
Nym_NGS215	NODE_253096_length_2092_cov_4.662524	(TGACTG)5	CCTCTGCTAACTCCCTTCCA	CTGCTAACTGGGACGAGGAA	30
Nym_NGS216	NODE_257426_length_1070_cov_6.166355	(TCTCTT)5	CCTATTCCCAGGACAAGC	CCTGAGGCAGACAAGAAGTG	30
Nym_NGS217	NODE_399312_length_1767_cov_5.246180	(ATCTGA)5	CGGTGATTAAGGCGGTTC	CGCTTCCTGCTCTTCCTTT	30
NymTr_1	nymphaea116185_c0_seq1_len=340	(AC)10	GACAAAGGGCTGAACAGACAC	AACAAGAAGCCCACCATCAC	20
NymTr_2	nymphaea118427_c0_seq2_len=1127	(AC)10	GCATTTTCTGTCGGGAATCTC	ACCGTGTGGGAACTGCTTC	20
NymTr_3	nymphaea125671_c0_seq1_len=1189	(TA)10	ATCGGGGAAGGAGAAATCAC	TTCAAGAGCAAGCAATCGAC	20
NymTr_4	nymphaea121720_c1_seq1_len=769	(AGA)6	ACATCAGCCTTCCAACTTCC	TTGATGTCCTCGTCCATGTG	18
NymTr_5	nymphaea108164_c0_seq1_len=344	(AAG)6	TTGAGCAAGGCAGGAGACAC	TGCATCACACGGGTTTAGAAG	18
NymTr_6	nymphaea143207_c0_seq3_len=2847	(AAT)6	TGAAGGTGTCATCCGAACAC	ACCGCCTTTTCTGTTTGTTG	18
NymTr_7	nymphaea125206_c0_seq1_len=1083	(CAC)7	CTGTACCCTTCTGTCCTCCTTG	TCTCCACCAATCAGCTCCTC	21
NymTr_8	nymphaea136360_c0_seq1_len=2227	(CGA)7	GGTGGCTTGGATGATTTGAG	TCATCGCCATCATTGTCATC	21
NymTr_9	nymphaea132621_c3_seq1_len=796	(GCA)6	TTTCCCTCTGCTCCTGTTTC	TGGAGACGACCTTCCAGTTG	18
NymTr_10	nymphaea133025_c0_seq1_len=1712	(AGG)6	AATAGCTTCACACGGTCGATG	ACGCTGGTCGAGTCCACTAC	18
NymTr_11	nymphaea130948_c1_seq2_len=1534	(GAG)6	GAAGCCCCAACTTTGAACTG	TCGTCTCCTCCTACCACCTG	18
NymTr_12	nymphaea127502_c0_seq1_len=1279	(GGA)7	ACCTCGGTGAAGTCGCAGT	AAGGGACGAAGATGAAGCTG	21
NymTr_13	nymphaea142785_c0_seq1_len=2745	(ATG)6	TCGATGGGAGAGTTGTGATG	TTCATTCCCCTCAATTCCTC	18
NymTr_14	nymphaea118471_c0_seq1_len=2130	(CCG)6	ATCGGTACTCCGTGGTCTTG	GTAGCCGGAAACTCTTGCTG	18
NymTr_15	nymphaea123655_c1_seq2_len=1020	(GCC)7	AGTTTCTGCATCGGAGGTTG	ATCGCGGCTTCTCTTCATAC	21
NymTr_16	nymphaea132790_c0_seq2_len=997	(CTC)7	TGCCAAGGAAGAGTTCGTG	TCCCTCGATATTCTCAGCAG	21
NymTr_17	nymphaea134718_c0_seq2_len=2336	(CGT)6	GATCAACTCCCGCTATCTCTC	ACGGGCGTGAGGCAGTAG	18
NymTr_18	nymphaea137695_c0_seq1_len=1432	(TCG)6	AGAAGCCCTCTCCTCGACTC	CCATTGACCCCAATTTGTTG	18
NymTr_19	nymphaea122082_c0_seq2_len=1700	(GCT)6	GCATGATTTTCCGGTTCTTG	TGTCGACCTTCGTCAGTGAG	18
NymTr_20	nymphaea132937_c0_seq3_len=748	(GCT)6	AGCAACCATAATTCGCCTTG	ATCGACCTCATCGTCCAGTC	18
NymTr_21	nymphaea130111_c2_seq3_len=1826	(TGC)6	TCCTGGTGCGATGAGTAGTG	GAAAAGGGATGACGATCTGC	18
NymTr_22	nymphaea142865_c0_seq1_len=2649	(GGT)6	ATGCCTACAGCAGAGGAGGA	TTGCGTAGTGCCATCTGTTC	18
NymTr_23	nymphaea125217_c0_seq1_len=1089	(GTG)7	TCTCCACCAATCAGCTCCTC	CCTCGTGCTCTGTACCCTTC	21
NymTr_24	nymphaea135787_c0_seq3_len=432	(GTT)6	TGCTCATCATCGTCTTCGTC	CCAAGAAGGAGAAGGACCAG	18
NymTr_25	nymphaea125851_c0_seq1_len=1350	(TAT)6	ACCGCCTTTTCTGTTTGTTG	TGAAGGTGTCATCCGAACAC	18
NymTr_26	nymphaea123765_c0_seq1_len=633	(ACAT)5	ATCCCAACAGACTCCTCCAG	TACCTGCGGAACCCATTAAG	20
NymTr_27	nymphaea121008_c0_seq3_len=1065	(CGTC)5	CTACGGTGGAGGAGGCTATG	CAAAAACCAGACAAGCACCA	20
NymTr_28	nymphaea123335_c0_seq2_len=674	(CTTT)5	TGGCTGTCAAAGAGCATCAG	ACACAGAACCCACCAAATCG	20
NymTr_29	nymphaea132731_c2_seq2_len=1557	(GAAG)5	CGAATTGAAGGCCAAAAGAG	ACAACGCCTGATCCTCTCAG	20
NymTr_30	nymphaea122305_c0_seq2_len=1135	(GACG)5	CAAAAACCAGACAAGCACCA	GAGGTGATCGCTACCCAAGA	20
NymTr_31	nymphaea141439_c0_seq10_len=1776	(TATG)5	AGCAACAGTTTCACCACCAG	GGTGTATGATAAGGGGGTGTG	20
NymTr_32	nymphaea125547_c0_seq1_len=1235	(CAA)6	TAAAAGCGAAGACCCGAAGA	TTTGGATGGGAGACTGTGAG	18
NymTr_33	nymphaea144362_c0_seq1_len=1465	(CAA)7	CAGGAGCAACGAGGCAAC	CATCTCCACTCTCCATTTCCA	21
NymTr_34	nymphaea121167_c0_seq1_len=629	(AAG)6	AAGGATCAGGACGGATGTTG	TCCCAGTTCTTCTCCGATTC	18
NymTr_35	nymphaea126835_c0_seq1_len=1621	(AAG)6	AATCAGAATGCCCAACCAAG	GGCGTTCTCCTTTCACCTTC	18
NymTr_36	nymphaea140622_c0_seq3_len=2924	(AAG)6	TCAGAAATCGGAGCCAGAAC	GAAGCTGACGGACTGGTTTG	18
NymTr_37	nymphaea130885_c0_seq1_len=1330	(ACC)6	GCAGACCACCACTCTCATCA	TGTCATCGGTCCACTTCATC	18
NymTr_38	nymphaea130481_c0_seq4_len=1097	(AGC)6	ATTGGAGATGACTGGCTTGC	GCAGAACCACCACTTGACAG	18
NymTr_39	nymphaea139076_c0_seq1_len=1903	(AGC)6	GCTTCCTGACAACCTCTCCA	GAGGATTGAGCAGGAGACCA	18
NymTr_40	nymphaea138292_c0_seq10_len=2430	(GCA)6	TGTAAGATGGCGTAGCAGCA	CCAGCAGCAATGTCTCAAAG	18
NymTr_41	nymphaea144936_c0_seq1_len=2549	(GCA)6	AAAATCAGCAAGGGCAACAG	AGCTGGGAGATTTGAGGTTG	18
NymTr_42	nymphaea142695_c0_seq1_len=1090	(AGG)6	AGAGGAAGGAGGGAACGAAG	GGAAGAAGAGAAACGCCAGA	18
NymTr_43	nymphaea133200_c1_seq1_len=732	(CTG)7	GCCACAGACAACGCACTC	CGAGCATCAAATGGAGCAG	21
