# Supplementary material for: Contrasting Reproductive Strategies of Two Nymphaea Species Affect Existing Natural Genetic Diversity as Assessed by Microsatellite Markers: Implications for Conservation and Wetlands Restoration
Source: Front Plant Sci. 2022 Mar 9;13:773572. doi: 10.3389/fpls.2022.773572 (PMC8965595; doi:10.3389/fpls.2022.773572)
Supplement: Supplementary Table 2 — Observations made using an epifluorescence microscope to test pollen fertility and viability in Nymphaea micrantha. [file Table_2.XLSX]

## Sheet: Sheet1
Supplementary Table 2: Observations made using an epifluorescence microscope to test pollen fertility and viability in Nymphaea micrantha.
S.No.	Pollen Fertility			Pollen viability
	Total number of Pollen grains	Number of fertile pollen grains	% Fertility	Total number of Pollen grains	Number of viable pollen grains	% Viability
1	63	54	85.7143	51	9	17.6471
2	38	35	92.1053	47	8	17.0213
3	47	42	89.3617	54	10	18.5185
4	61	49	80.3279	66	18	27.2727
5	52	49	94.2308	43	8	18.6047
6	59	51	86.4407	33	6	18.1818
7	44	37	84.0909	52	12	23.0769
8	42	41	97.619	44	7	15.9091
9	55	48	87.2727	47	7	14.8936
10	46	43	93.4783	30	4	13.3333
11	60	51	85	36	5	13.8889
12	52	42	80.7692	41	6	14.6341
13	40	38	95	39	6	15.3846
14	53	41	77.3585	53	14	26.4151
15	54	46	85.1852	46	8	17.3913
16	61	55	90.1639	37	5	13.5135
17	63	57	90.4762	45	6	13.3333
18	58	50	86.2069	63	17	26.9841
19	49	43	87.7551	39	6	15.3846
20	47	42	89.3617	42	8	19.0476
Mean			87.8959			18.0218
Standard Deviation			5.17876			4.50796
