# Supplementary material for: Contrasting Reproductive Strategies of Two Nymphaea Species Affect Existing Natural Genetic Diversity as Assessed by Microsatellite Markers: Implications for Conservation and Wetlands Restoration
Source: Front Plant Sci. 2022 Mar 9;13:773572. doi: 10.3389/fpls.2022.773572 (PMC8965595; doi:10.3389/fpls.2022.773572)
Supplement: Supplementary Table 3 — Assembly statistics of Nymphaea micrantha genome. [file Table_3.XLSX]

## Sheet: Sheet1
Supplementary Table 3: Assembly statistics of Nymphaea micrantha genome.
Statistics	Contigs length
Raw reads (Gb)	5.7
Assembly size (bp)	309080525
No. of contigs	518464
Max Contig Length (bp)	16344
Min Contig Length (bp)	200
Average Contig Length (bp)	596
N50 (bp)	783
(G + C)s %	0.3841
