# Supplementary material for: Contrasting Reproductive Strategies of Two Nymphaea Species Affect Existing Natural Genetic Diversity as Assessed by Microsatellite Markers: Implications for Conservation and Wetlands Restoration
Source: Front Plant Sci. 2022 Mar 9;13:773572. doi: 10.3389/fpls.2022.773572 (PMC8965595; doi:10.3389/fpls.2022.773572)
Supplement: Supplementary Table 4 — Contigs containing simple sequence repeats in Nymphaea genome. [file Table_4.XLSX]

## Sheet: Sheet1
Supplementary Table 4: Contigs containing simple sequence repeats in Nymphaea genome.
CONTIG_ID	SSR nr.	SSR type	SSR	size	start	end
NODE_40_length_1327_cov_5.743783	1	c	(TC)9(AC)6	30	368	397
NODE_77_length_1839_cov_4.920609	1	p2	(AG)7	14	1550	1563
NODE_168_length_1231_cov_3.792851	1	p2	(TA)17	34	1	34
NODE_198_length_3213_cov_4.917522	1	p1	(T)11	11	2737	2747
NODE_202_length_1338_cov_4.877429	1	p1	(T)11	11	1373	1383
NODE_203_length_1564_cov_5.466113	1	p2	(TC)15	30	1063	1092
NODE_203_length_1564_cov_5.466113	2	p1	(A)13	13	1591	1603
NODE_240_length_2007_cov_5.574987	1	p2	(TC)10	20	161	180
NODE_262_length_1171_cov_4.657557	1	p2	(AG)6	12	978	989
NODE_262_length_1171_cov_4.657557	2	c	(AG)6atctatggagaa(AG)8	40	1164	1203
NODE_336_length_2618_cov_5.124141	1	c	(TG)16(AG)10	52	1	52
NODE_336_length_2618_cov_5.124141	2	p1	(A)10	10	1156	1165
NODE_413_length_2117_cov_3.886160	1	p2	(AG)13	26	84	109
NODE_413_length_2117_cov_3.886160	2	p2	(TA)10	20	1362	1381
NODE_420_length_1513_cov_5.898876	1	p1	(T)10	10	1528	1537
NODE_453_length_2809_cov_5.147383	1	p1	(A)10	10	2304	2313
NODE_456_length_2435_cov_4.121150	1	c	(AT)8(AG)13	42	1	42
NODE_456_length_2435_cov_4.121150	2	p2	(AG)13	26	711	736
NODE_456_length_2435_cov_4.121150	3	p2	(AG)12	24	2363	2386
NODE_538_length_1276_cov_4.505486	1	p1	(T)10	10	583	592
NODE_540_length_2403_cov_4.918435	1	p2	(AT)7	14	1893	1906
NODE_544_length_1412_cov_3.761332	1	p1	(A)10	10	83	92
NODE_544_length_1412_cov_3.761332	2	p1	(A)10	10	625	634
NODE_545_length_1395_cov_5.166308	1	p2	(TA)9	18	1432	1449
NODE_600_length_1278_cov_5.077465	1	p1	(T)10	10	153	162
NODE_600_length_1278_cov_5.077465	2	p1	(T)12	12	1291	1302
NODE_671_length_1256_cov_4.437102	1	p2	(TC)8	16	1293	1308
NODE_673_length_1001_cov_4.175824	1	p2	(AT)7	14	901	914
NODE_760_length_2166_cov_4.277470	1	p1	(T)15	15	204	218
NODE_760_length_2166_cov_4.277470	2	c	(T)11gttgctaaaatgcatcccaaaaggtgcattggtaatgagcaattgcttggctatc(T)10	76	380	455
NODE_761_length_2703_cov_5.052904	1	p1	(T)10	10	23	32
NODE_764_length_1951_cov_4.855971	1	p2	(CA)7	14	115	128
NODE_765_length_1433_cov_5.122819	1	p2	(TA)7	14	940	953
NODE_767_length_1167_cov_4.251928	1	p1	(T)11	11	888	898
NODE_767_length_1167_cov_4.251928	2	p2	(AT)6	12	1020	1031
NODE_828_length_2482_cov_5.117647	1	p2	(GA)6	12	260	271
NODE_838_length_1148_cov_4.694251	1	p2	(AG)6	12	48	59
NODE_876_length_953_cov_5.537251	1	p1	(A)10	10	343	352
NODE_937_length_2044_cov_4.725538	1	c	(CT)14g(TC)6(AC)7	55	162	216
NODE_938_length_2061_cov_4.944202	1	p1	(T)17	17	7	23
NODE_948_length_1535_cov_5.514007	1	p1	(T)11	11	103	113
NODE_952_length_1561_cov_4.441384	1	p1	(T)10	10	23	32
NODE_952_length_1561_cov_4.441384	2	p2	(TC)11	22	943	964
NODE_953_length_1170_cov_4.541026	1	p2	(GA)13	26	662	687
NODE_953_length_1170_cov_4.541026	2	p2	(AG)6	12	943	954
NODE_971_length_2785_cov_5.010772	1	p2	(CA)9	18	1385	1402
NODE_972_length_1942_cov_5.018538	1	p2	(AC)14	28	1161	1188
NODE_1002_length_1425_cov_4.900351	1	c	(AG)8cgagagagagagggcacccattactcccccctgctcttttc(CT)11	79	534	612
NODE_1003_length_1670_cov_5.126946	1	p1	(C)11	11	1702	1712
NODE_1011_length_2410_cov_5.111618	1	p1	(A)13	13	55	67
NODE_1017_length_1038_cov_3.918112	1	p1	(A)11	11	1017	1027
NODE_1019_length_1255_cov_5.286852	1	p3	(CTT)9	27	642	668
NODE_1027_length_1427_cov_5.197618	1	p1	(A)12	12	131	142
NODE_1032_length_1720_cov_4.433139	1	p2	(TA)6	12	1212	1223
NODE_1032_length_1720_cov_4.433139	2	p2	(CT)14	28	1525	1552
NODE_1033_length_2600_cov_5.117308	1	c	(CT)18tgttagtgttcctgtggtgtcgactgtatttggtccacttgcccccttgtctctgccccacttgtccccttggatctgccg(TC)10	137	1092	1228
NODE_1033_length_2600_cov_5.117308	2	p2	(AG)9	18	2295	2312
NODE_1033_length_2600_cov_5.117308	3	c	(AT)7gccatctatagacaagatttattgactacttcaagtgcatgagatctctaatggctgtaaaagaccacgatttcgtttctgaaaagac(A)14	116	2519	2634
NODE_1075_length_1498_cov_5.131509	1	p1	(A)11	11	387	397
NODE_1093_length_1056_cov_5.302083	1	p2	(CT)6	12	692	703
NODE_1115_length_2280_cov_4.413597	1	p2	(TC)14	28	253	280
NODE_1115_length_2280_cov_4.413597	2	p1	(A)10	10	398	407
NODE_1116_length_1284_cov_4.949377	1	p2	(TC)7	14	731	744
NODE_1116_length_1284_cov_4.949377	2	p2	(CT)7	14	848	861
NODE_1166_length_3400_cov_4.798235	1	p1	(T)10	10	11	20
NODE_1166_length_3400_cov_4.798235	2	c	(AC)8(AT)7	30	2492	2521
NODE_1188_length_1238_cov_5.425686	1	p2	(TA)9	18	724	741
NODE_1188_length_1238_cov_5.425686	2	p2	(TA)8	16	958	973
NODE_1189_length_3365_cov_4.826449	1	p2	(GT)6	12	916	927
NODE_1189_length_3365_cov_4.826449	2	p2	(AT)11	22	1916	1937
NODE_1189_length_3365_cov_4.826449	3	p2	(GA)7	14	2388	2401
NODE_1189_length_3365_cov_4.826449	4	p3	(CGA)8	24	2965	2988
NODE_1189_length_3365_cov_4.826449	5	p1	(A)10	10	3404	3413
NODE_1313_length_1138_cov_4.268014	1	p2	(GA)6	12	632	643
NODE_1323_length_1154_cov_5.826690	1	p1	(A)14	14	1	14
NODE_1351_length_2333_cov_4.882555	1	p1	(T)10	10	2052	2061
NODE_1376_length_2467_cov_4.647750	1	p2	(TA)7	14	449	462
NODE_1424_length_1402_cov_11.454350	1	p1	(A)16	16	444	459
NODE_1424_length_1402_cov_11.454350	2	p1	(G)14	14	1318	1331
NODE_1431_length_1338_cov_4.331839	1	p2	(AG)10	20	1283	1302
NODE_1445_length_1478_cov_4.979026	1	p2	(GA)12	24	1307	1330
NODE_1463_length_1382_cov_4.232272	1	p1	(A)10	10	685	694
NODE_1468_length_1170_cov_4.558120	1	p1	(T)11	11	34	44
NODE_1468_length_1170_cov_4.558120	2	p3	(TTC)7	21	639	659
NODE_1468_length_1170_cov_4.558120	3	p2	(TC)19	38	906	943
NODE_1520_length_1802_cov_4.952275	1	p1	(A)11	11	23	33
NODE_1520_length_1802_cov_4.952275	2	p1	(T)11	11	288	298
NODE_1558_length_2135_cov_4.060890	1	p1	(A)12	12	279	290
NODE_1558_length_2135_cov_4.060890	2	p1	(T)10	10	1048	1057
NODE_1600_length_1045_cov_4.568421	1	p1	(T)11	11	1	11
NODE_1602_length_1012_cov_5.300395	1	p1	(T)10	10	332	341
NODE_1602_length_1012_cov_5.300395	2	p1	(T)19	19	1028	1046
NODE_1621_length_1096_cov_4.444343	1	p1	(T)13	13	236	248
NODE_1621_length_1096_cov_4.444343	2	p3	(AGA)6	18	561	578
NODE_1621_length_1096_cov_4.444343	3	p1	(A)11	11	1123	1133
NODE_1625_length_2332_cov_4.994425	1	c	(GA)8gtggggagagatgt(GA)6	42	1224	1265
NODE_1625_length_2332_cov_4.994425	2	p1	(A)10	10	1883	1892
NODE_1632_length_1261_cov_4.736717	1	p2	(AG)6	12	16	27
NODE_1632_length_1261_cov_4.736717	2	p2	(TC)8	16	337	352
NODE_1776_length_1999_cov_4.464732	1	p2	(TA)6	12	704	715
NODE_1776_length_1999_cov_4.464732	2	p2	(CT)8	16	868	883
NODE_1776_length_1999_cov_4.464732	3	p2	(TC)11	22	990	1011
NODE_1818_length_1587_cov_4.793951	1	c	(TC)6ttatattctcattttatcggtcctttctctcttatattcctattttatcggccctctctctcttccttatatttccattttataggccctctt(TC)6	117	260	376
NODE_1818_length_1587_cov_4.793951	2	p2	(AG)18	36	887	922
NODE_1818_length_1587_cov_4.793951	3	p2	(TA)8	16	1361	1376
NODE_1836_length_1108_cov_14.110108	1	c	(CT)9(CA)7	32	60	91
NODE_1994_length_1604_cov_4.710100	1	p1	(A)10	10	1069	1078
NODE_1994_length_1604_cov_4.710100	2	p1	(A)11	11	1626	1636
NODE_2072_length_2256_cov_4.792110	1	p2	(TC)6	12	18	29
NODE_2134_length_2648_cov_5.029078	1	p1	(G)14	14	465	478
NODE_2151_length_1538_cov_5.187906	1	p2	(TC)7	14	480	493
NODE_2151_length_1538_cov_5.187906	2	p1	(T)14	14	1575	1588
NODE_2165_length_1597_cov_5.427051	1	p1	(A)10	10	1209	1218
NODE_2170_length_1030_cov_5.007767	1	p1	(A)14	14	1	14
NODE_2186_length_2255_cov_4.710421	1	p2	(AG)11	22	747	768
NODE_2239_length_1043_cov_4.958773	1	p2	(GA)21	42	1	42
NODE_2239_length_1043_cov_4.958773	2	p1	(T)13	13	170	182
NODE_2240_length_1334_cov_4.652924	1	c	(TA)11tgaaaagagagg(GA)6	46	1108	1153
NODE_2245_length_2471_cov_4.925941	1	p2	(CT)7	14	409	422
NODE_2245_length_2471_cov_4.925941	2	p1	(T)10	10	1451	1460
NODE_2271_length_1554_cov_4.626770	1	p1	(T)11	11	445	455
NODE_2370_length_2552_cov_4.212774	1	p1	(A)10	10	2020	2029
NODE_2394_length_1622_cov_4.290999	1	c	(CA)13a(AG)6	39	380	418
NODE_2394_length_1622_cov_4.290999	2	p1	(A)10	10	875	884
NODE_2402_length_1274_cov_3.821821	1	p1	(T)12	12	24	35
NODE_2402_length_1274_cov_3.821821	2	p2	(TA)11	22	510	531
NODE_2413_length_1017_cov_5.793510	1	p2	(AG)6	12	103	114
NODE_2449_length_2131_cov_4.199437	1	p6	(CTACTG)6	36	196	231
NODE_2451_length_1572_cov_4.620229	1	p1	(A)16	16	8	23
NODE_2451_length_1572_cov_4.620229	2	p2	(TC)17	34	210	243
NODE_2451_length_1572_cov_4.620229	3	p2	(TC)8	16	1243	1258
NODE_2455_length_1462_cov_4.922025	1	p2	(CT)7	14	499	512
NODE_2487_length_1171_cov_4.269001	1	p1	(A)13	13	451	463
NODE_2487_length_1171_cov_4.269001	2	p3	(ATC)5	15	912	926
NODE_2532_length_1068_cov_3.875468	1	p2	(AG)15	30	10	39
NODE_2565_length_1018_cov_5.176817	1	p2	(AC)6	12	158	169
NODE_2604_length_2566_cov_4.577942	1	p1	(T)12	12	210	221
NODE_2701_length_1049_cov_5.189704	1	p1	(T)19	19	1084	1102
NODE_2717_length_2291_cov_4.617634	1	p2	(TC)7	14	809	822
NODE_2717_length_2291_cov_4.617634	2	p2	(AC)6	12	1445	1456
NODE_2724_length_1934_cov_5.382110	1	c	(CT)15(AT)10	50	1938	1987
NODE_2739_length_1998_cov_4.898398	1	p1	(T)10	10	239	248
NODE_2739_length_1998_cov_4.898398	2	p2	(TA)7	14	452	465
NODE_2747_length_1790_cov_5.394413	1	p1	(A)10	10	1292	1301
NODE_2787_length_1119_cov_6.357462	1	p2	(TC)6	12	1119	1130
NODE_2788_length_1529_cov_3.533682	1	p2	(TA)14	28	388	415
NODE_2834_length_2782_cov_5.285047	1	p1	(T)14	14	1980	1993
NODE_2834_length_2782_cov_5.285047	2	p1	(T)12	12	2824	2835
NODE_2857_length_1162_cov_4.228055	1	p2	(TA)8	16	707	722
NODE_2866_length_1687_cov_4.664493	1	p2	(AG)20	40	681	720
NODE_2871_length_1066_cov_4.243902	1	p2	(TC)6	12	338	349
NODE_2933_length_1357_cov_4.476787	1	p2	(TC)6	12	316	327
NODE_2936_length_2103_cov_4.950547	1	p1	(T)10	10	735	744
NODE_2978_length_1238_cov_4.403877	1	p2	(AG)25	50	1	50
NODE_2988_length_2847_cov_4.664910	1	p2	(TA)11	22	768	789
NODE_2989_length_1183_cov_3.292477	1	c	(A)10tgaagacgataaatgagaatggtactcatccaaaagaa(AG)8	64	926	989
NODE_2994_length_1204_cov_4.838040	1	p2	(GA)7	14	778	791
NODE_2998_length_2114_cov_5.428098	1	p2	(TA)11	22	203	224
NODE_2998_length_2114_cov_5.428098	2	p2	(TG)9	18	1762	1779
NODE_3057_length_1899_cov_4.679832	1	p1	(T)10	10	1800	1809
NODE_3086_length_1529_cov_3.794637	1	p1	(T)16	16	129	144
NODE_3086_length_1529_cov_3.794637	2	p1	(T)10	10	1155	1164
NODE_3086_length_1529_cov_3.794637	3	p4	(ATTT)5	20	1447	1466
NODE_3138_length_1493_cov_5.912927	1	p1	(C)18	18	1	18
NODE_3202_length_1412_cov_4.075779	1	p1	(T)11	11	119	129
NODE_3202_length_1412_cov_4.075779	2	p1	(T)10	10	645	654
NODE_3235_length_1618_cov_4.515451	1	p2	(AG)24	48	1625	1672
NODE_3258_length_1461_cov_4.544832	1	p2	(TA)17	34	3	36
NODE_3291_length_1616_cov_5.038366	1	c	(TC)9tacctcatgcacactcacaaacatgcacacatgcatccatgcatagtgcacaccaattcactagctagtaatgaattggtgtcaacatctctt(TC)11	133	341	473
NODE_3293_length_2542_cov_5.242722	1	p2	(GA)6	12	1821	1832
NODE_3356_length_1467_cov_4.177914	1	p1	(A)10	10	27	36
NODE_3463_length_1831_cov_4.433643	1	p1	(T)14	14	1485	1498
NODE_3463_length_1831_cov_4.433643	2	p1	(T)16	16	1601	1616
NODE_3497_length_1383_cov_4.686913	1	p1	(A)10	10	1171	1180
NODE_3510_length_2780_cov_4.723741	1	p2	(CT)13	26	2104	2129
NODE_3519_length_1997_cov_5.334502	1	p1	(T)10	10	352	361
NODE_3519_length_1997_cov_5.334502	2	p1	(T)11	11	513	523
NODE_3542_length_1019_cov_4.068695	1	p3	(TTC)11	33	596	628
NODE_3609_length_1683_cov_4.166964	1	p3	(AAT)6	18	211	228
NODE_3609_length_1683_cov_4.166964	2	p1	(T)11	11	547	557
NODE_3609_length_1683_cov_4.166964	3	c	(TC)12ta(AC)14	54	1153	1206
NODE_3609_length_1683_cov_4.166964	4	p1	(T)15	15	1723	1737
NODE_3613_length_1012_cov_5.272727	1	p2	(AT)6	12	786	797
NODE_3629_length_1335_cov_4.734831	1	p1	(A)12	12	7	18
NODE_3690_length_1923_cov_5.644826	1	p1	(T)10	10	1184	1193
NODE_3709_length_3230_cov_5.555727	1	p1	(A)11	11	594	604
NODE_3752_length_1493_cov_4.430007	1	p2	(AT)14	28	1182	1209
NODE_3755_length_2384_cov_5.158138	1	p1	(A)11	11	2005	2015
NODE_3756_length_2135_cov_4.836066	1	p1	(T)10	10	154	163
NODE_3756_length_2135_cov_4.836066	2	p1	(T)10	10	1768	1777
NODE_3765_length_2174_cov_5.551518	1	p2	(CT)13	26	1252	1277
NODE_3765_length_2174_cov_5.551518	2	p2	(AG)6	12	1692	1703
NODE_3768_length_3671_cov_5.034595	1	c	(TG)8tttgtgggcgcatgcacacacatgtgcttgttgt(GA)8	66	1503	1568
NODE_3768_length_3671_cov_5.034595	2	p2	(AG)23	46	2289	2334
NODE_3782_length_2055_cov_4.665693	1	p2	(CT)6	12	658	669
NODE_3782_length_2055_cov_4.665693	2	p1	(T)18	18	2090	2107
NODE_3783_length_1710_cov_4.356725	1	p2	(AG)13	26	359	384
NODE_3932_length_977_cov_4.101331	1	p1	(A)13	13	2	14
NODE_3932_length_977_cov_4.101331	2	p1	(A)10	10	595	604
NODE_3936_length_1582_cov_4.405816	1	p1	(T)10	10	242	251
NODE_3936_length_1582_cov_4.405816	2	c	(CT)9(GT)7	32	1141	1172
NODE_3936_length_1582_cov_4.405816	3	p2	(AG)7	14	1581	1594
NODE_3969_length_1457_cov_4.899108	1	p2	(AT)6	12	144	155
NODE_4006_length_1303_cov_3.899463	1	p1	(T)14	14	26	39
NODE_4075_length_1130_cov_4.142478	1	p1	(T)15	15	1170	1184
NODE_4165_length_1261_cov_5.402855	1	p2	(GA)7	14	491	504
NODE_4165_length_1261_cov_5.402855	2	p2	(AG)7	14	895	908
NODE_4261_length_1427_cov_4.493343	1	p2	(AT)8	16	83	98
NODE_4261_length_1427_cov_4.493343	2	p2	(TA)12	24	1443	1466
NODE_4427_length_1936_cov_5.607438	1	p1	(A)10	10	1622	1631
NODE_4448_length_1589_cov_5.016363	1	p1	(A)10	10	248	257
NODE_4448_length_1589_cov_5.016363	2	p2	(CT)9	18	804	821
NODE_4450_length_1795_cov_5.865738	1	p2	(AG)11	22	1510	1531
NODE_4455_length_3418_cov_5.335577	1	c	(AT)13agttactgttaaggatgtaatatatttttttaactagtgcccatttgccaaaatttacaactcaaatatc(T)11	107	2370	2476
NODE_4455_length_3418_cov_5.335577	2	p1	(T)10	10	3463	3472
NODE_4496_length_1481_cov_5.072924	1	p2	(CT)10	20	953	972
NODE_4496_length_1481_cov_5.072924	2	c	(CT)8(CA)7	30	1116	1145
NODE_4500_length_2827_cov_5.147506	1	p2	(AT)7	14	337	350
NODE_4500_length_2827_cov_5.147506	2	p2	(AT)9	18	696	713
NODE_4500_length_2827_cov_5.147506	3	p2	(TG)14	28	1807	1834
NODE_4504_length_2268_cov_5.328043	1	p2	(GA)6	12	230	241
NODE_4574_length_1077_cov_3.649954	1	p2	(TA)19	38	57	94
NODE_4633_length_1022_cov_4.205480	1	p1	(A)12	12	556	567
NODE_4634_length_1311_cov_5.376812	1	p3	(AAT)9	27	620	646
NODE_4685_length_2212_cov_4.857143	1	p1	(A)10	10	227	236
NODE_4714_length_1263_cov_5.726049	1	p1	(T)12	12	3	14
NODE_4733_length_3094_cov_5.164512	1	p1	(T)12	12	968	979
NODE_4733_length_3094_cov_5.164512	2	p1	(A)10	10	3139	3148
NODE_4745_length_1355_cov_4.617712	1	p1	(T)10	10	20	29
NODE_4756_length_2022_cov_4.649357	1	p2	(GA)11	22	686	707
NODE_4785_length_1328_cov_4.429217	1	p1	(T)10	10	17	26
NODE_4803_length_1546_cov_5.346701	1	p1	(T)10	10	1377	1386
NODE_4807_length_1480_cov_5.102027	1	p1	(T)10	10	1307	1316
NODE_4816_length_1672_cov_5.142942	1	p2	(CT)20	40	12	51
NODE_4818_length_1933_cov_5.002587	1	p2	(TG)7	14	1248	1261
NODE_4819_length_1730_cov_4.615607	1	p1	(A)15	15	1770	1784
NODE_4836_length_1921_cov_4.981260	1	p2	(TA)10	20	234	253
NODE_4836_length_1921_cov_4.981260	2	p1	(T)10	10	989	998
NODE_4838_length_2337_cov_5.410783	1	p2	(CT)6	12	652	663
NODE_4838_length_2337_cov_5.410783	2	p2	(GA)11	22	2071	2092
NODE_4839_length_3043_cov_5.301347	1	p1	(T)10	10	86	95
NODE_4839_length_3043_cov_5.301347	2	p2	(AG)7	14	2418	2431
NODE_4840_length_1791_cov_4.321050	1	c	(TA)6c(AT)8	29	1334	1362
NODE_4874_length_1761_cov_5.337308	1	c	(TC)6(TG)8	28	1538	1565
NODE_4878_length_1646_cov_4.779465	1	p1	(A)10	10	1488	1497
NODE_4894_length_4646_cov_5.554455	1	p2	(TC)6	12	2559	2570
NODE_4899_length_1030_cov_4.978641	1	c	(TG)6(GA)7	26	1024	1049
NODE_4977_length_1546_cov_4.049159	1	p3	(GAG)5	15	160	174
NODE_4988_length_2647_cov_4.562524	1	p1	(T)10	10	2692	2701
NODE_4989_length_1475_cov_5.345085	1	p1	(A)10	10	1516	1525
NODE_4996_length_1788_cov_5.074944	1	p1	(T)16	16	14	29
NODE_4996_length_1788_cov_5.074944	2	p2	(AT)16	32	1650	1681
NODE_4998_length_1464_cov_5.001366	1	p3	(ATG)5	15	953	967
NODE_5003_length_1400_cov_5.423572	1	p2	(CT)12	24	156	179
NODE_5031_length_2318_cov_5.073339	1	p1	(A)10	10	559	568
NODE_5031_length_2318_cov_5.073339	2	p2	(CT)6	12	713	724
NODE_5031_length_2318_cov_5.073339	3	p2	(AT)7	14	2358	2371
NODE_5067_length_2096_cov_4.861641	1	p1	(A)11	11	386	396
NODE_5067_length_2096_cov_4.861641	2	p2	(CT)6	12	1828	1839
NODE_5089_length_1356_cov_8.782449	1	c	(AT)9(AC)7	32	529	560
NODE_5134_length_2299_cov_5.543280	1	p2	(TG)8	16	1683	1698
NODE_5136_length_1236_cov_4.940938	1	p1	(T)10	10	154	163
NODE_5137_length_3220_cov_8.638199	1	p1	(T)10	10	851	860
NODE_5204_length_1438_cov_4.235049	1	p1	(T)13	13	25	37
NODE_5204_length_1438_cov_4.235049	2	p2	(AT)6	12	510	521
NODE_5204_length_1438_cov_4.235049	3	p2	(AC)7	14	1057	1070
NODE_5230_length_1594_cov_5.470514	1	p1	(A)10	10	563	572
NODE_5285_length_988_cov_4.642713	1	p2	(AT)6	12	187	198
NODE_5294_length_1355_cov_4.512177	1	p2	(AG)9	18	770	787
NODE_5294_length_1355_cov_4.512177	2	p2	(AG)7	14	900	913
NODE_5294_length_1355_cov_4.512177	3	p2	(AG)6	12	1381	1392
NODE_5307_length_1851_cov_5.273366	1	p1	(A)10	10	391	400
NODE_5418_length_1103_cov_4.232094	1	p3	(TAA)5	15	854	868
NODE_5418_length_1103_cov_4.232094	2	p2	(AT)6	12	1007	1018
NODE_5446_length_999_cov_3.807808	1	p1	(T)10	10	714	723
NODE_5565_length_2868_cov_5.578801	1	p3	(TCT)7	21	153	173
NODE_5565_length_2868_cov_5.578801	2	c	(CT)7ccccttcaagttcattgctctt(TC)6	48	778	825
NODE_5568_length_1617_cov_5.823129	1	p2	(TC)6	12	20	31
NODE_5775_length_1243_cov_5.538214	1	p1	(T)12	12	676	687
NODE_5777_length_2510_cov_4.068128	1	p1	(A)17	17	2537	2553
NODE_5799_length_1075_cov_5.161860	1	p1	(T)12	12	3	14
NODE_5803_length_1929_cov_4.622084	1	p1	(T)10	10	133	142
NODE_5803_length_1929_cov_4.622084	2	p1	(A)10	10	825	834
NODE_5803_length_1929_cov_4.622084	3	p1	(A)14	14	1957	1970
NODE_5804_length_978_cov_4.900818	1	p2	(TA)13	26	341	366
NODE_5906_length_1561_cov_4.848815	1	p2	(GA)10	20	9	28
NODE_5915_length_1825_cov_5.879452	1	c	(CT)8(AT)7	30	1309	1338
NODE_5920_length_1237_cov_4.549717	1	p1	(T)12	12	3	14
NODE_5921_length_1143_cov_4.801400	1	p2	(GA)7	14	60	73
NODE_5968_length_1183_cov_5.005072	1	p1	(T)12	12	282	293
NODE_5970_length_2371_cov_5.403205	1	p2	(TA)9	18	158	175
NODE_5976_length_3722_cov_4.301451	1	p2	(TG)6	12	3532	3543
NODE_6041_length_1246_cov_4.588283	1	p3	(TAA)5	15	544	558
NODE_6042_length_1141_cov_4.709027	1	p1	(T)11	11	837	847
NODE_6110_length_1081_cov_3.983349	1	p2	(AG)6	12	831	842
NODE_6194_length_1120_cov_4.068750	1	p2	(CT)11	22	565	586
NODE_6194_length_1120_cov_4.068750	2	p2	(TC)8	16	706	721
NODE_6194_length_1120_cov_4.068750	3	p1	(T)10	10	992	1001
NODE_6224_length_2441_cov_4.804588	1	p1	(T)12	12	2476	2487
NODE_6286_length_990_cov_5.041414	1	p2	(CT)25	50	994	1043
NODE_6377_length_1018_cov_4.103143	1	c	(GA)7ggcgaaaaaagcacttgagcgcttatctagggggtggaatgaaatactcctcacttagagaaaaga(AG)6	92	662	753
NODE_6381_length_1193_cov_4.778709	1	p2	(TA)6	12	1226	1237
NODE_6395_length_1019_cov_4.629048	1	p2	(AT)10	20	218	237
NODE_6395_length_1019_cov_4.629048	2	p1	(T)10	10	785	794
NODE_6399_length_1316_cov_4.243921	1	p1	(A)11	11	56	66
NODE_6431_length_1230_cov_4.745528	1	p2	(AC)12	24	236	259
NODE_6431_length_1230_cov_4.745528	2	p1	(T)10	10	1198	1207
NODE_6492_length_1121_cov_4.358608	1	p1	(T)11	11	327	337
NODE_6533_length_1444_cov_4.729224	1	p1	(A)10	10	169	178
NODE_6533_length_1444_cov_4.729224	2	p1	(T)10	10	345	354
NODE_6569_length_1779_cov_5.278246	1	p2	(AG)15	30	1048	1077
NODE_6640_length_1251_cov_4.215028	1	p1	(T)10	10	1294	1303
NODE_6653_length_1587_cov_5.331443	1	p1	(T)12	12	409	420
NODE_6664_length_1757_cov_5.191235	1	c	(GA)8agac(GAA)5	35	160	194
NODE_6664_length_1757_cov_5.191235	2	p2	(TC)11	22	499	520
NODE_6756_length_975_cov_4.726154	1	p1	(A)10	10	793	802
NODE_6815_length_1512_cov_4.334656	1	c	(TC)18tattggaagttggtgttttttgtgtaatgttgaaattta(CT)7	89	732	820
NODE_6819_length_1901_cov_4.618096	1	p3	(GAA)5	15	146	160
NODE_6826_length_2472_cov_4.977346	1	p1	(T)10	10	59	68
NODE_6826_length_2472_cov_4.977346	2	p2	(AG)6	12	193	204
NODE_6832_length_1607_cov_5.440572	1	p2	(TC)8	16	1518	1533
NODE_6835_length_1047_cov_4.806113	1	p1	(T)17	17	21	37
NODE_6838_length_1991_cov_11.452034	1	p2	(GA)6	12	1741	1752
NODE_6838_length_1991_cov_11.452034	2	p1	(T)10	10	1947	1956
NODE_6869_length_1745_cov_5.272206	1	p1	(A)10	10	897	906
NODE_6954_length_1643_cov_4.981132	1	p1	(A)11	11	513	523
NODE_6954_length_1643_cov_4.981132	2	p3	(AAG)6	18	1458	1475
NODE_6992_length_1870_cov_4.479145	1	p1	(T)17	17	1	17
NODE_7039_length_2890_cov_5.259516	1	p2	(AG)6	12	532	543
NODE_7039_length_2890_cov_5.259516	2	p1	(T)15	15	2466	2480
NODE_7040_length_4484_cov_5.223015	1	p2	(TC)7	14	168	181
NODE_7121_length_1043_cov_5.388303	1	p2	(CA)7	14	765	778
NODE_7122_length_1443_cov_5.408870	1	p2	(AG)6	12	161	172
NODE_7207_length_960_cov_5.268750	1	p2	(CT)6	12	853	864
NODE_7209_length_1493_cov_5.614200	1	c	(T)11cttcactacaatcaagaaaatgtcatttctatcgggaacc(T)10	61	202	262
NODE_7240_length_1253_cov_5.085395	1	p1	(A)11	11	173	183
NODE_7303_length_1070_cov_4.342991	1	p1	(A)10	10	433	442
NODE_7303_length_1070_cov_4.342991	2	p1	(A)10	10	898	907
NODE_7321_length_2950_cov_4.649491	1	p2	(AG)8	16	162	177
NODE_7322_length_954_cov_7.753669	1	p1	(T)20	20	989	1008
NODE_7339_length_2337_cov_4.764656	1	p1	(T)10	10	276	285
NODE_7342_length_1129_cov_4.658990	1	p1	(T)11	11	862	872
NODE_7369_length_2974_cov_5.260592	1	p2	(GA)6	12	2738	2749
NODE_7461_length_3331_cov_4.739718	1	p2	(TC)11	22	2300	2321
NODE_7525_length_1103_cov_4.911151	1	p1	(T)15	15	10	24
NODE_7525_length_1103_cov_4.911151	2	p2	(TA)7	14	854	867
NODE_7528_length_1623_cov_5.242760	1	p1	(A)10	10	1433	1442
NODE_7646_length_2212_cov_5.147378	1	p1	(T)10	10	37	46
NODE_7647_length_3048_cov_4.797244	1	p2	(GA)8	16	12	27
NODE_7647_length_3048_cov_4.797244	2	c	(TC)11tatcttttgtgtttgtgtgtgtgtagtgaaacctactcactctagttcagttcaattgtagaaatgtgcgtgtcttctgat(TC)9	121	2982	3102
NODE_7662_length_3000_cov_5.522000	1	p3	(TAT)5	15	1432	1446
NODE_7721_length_1689_cov_4.943161	1	p1	(T)12	12	317	328
NODE_7721_length_1689_cov_4.943161	2	p2	(TA)6	12	684	695
NODE_7740_length_1493_cov_4.129940	1	p2	(TA)13	26	1010	1035
NODE_7740_length_1493_cov_4.129940	2	p2	(TC)15	30	1517	1546
NODE_7742_length_2090_cov_4.283254	1	c	(TC)13ttgaaacaagaagctgatg(A)10gtttaaaatggcaagcttcacgactcatgaacaagacgcagagaaagcgccattgatttacatcaccaccgaaaaaa(AG)8aaagaa(AG)7	168	15	182
NODE_7753_length_1116_cov_4.143369	1	p1	(A)11	11	695	705
NODE_7790_length_1100_cov_4.798182	1	p1	(T)11	11	1035	1045
NODE_7793_length_1825_cov_4.637260	1	p2	(TA)10	20	661	680
NODE_7793_length_1825_cov_4.637260	2	p1	(T)10	10	1499	1508
NODE_7856_length_1392_cov_6.045259	1	p2	(TC)7	14	382	395
NODE_7914_length_3387_cov_5.376439	1	p1	(A)10	10	85	94
NODE_7956_length_1664_cov_5.418269	1	p1	(A)10	10	736	745
NODE_7958_length_1107_cov_6.129178	1	p1	(T)12	12	32	43
NODE_7970_length_1169_cov_3.716852	1	p2	(CT)7	14	562	575
NODE_7994_length_1389_cov_4.781137	1	p1	(A)12	12	1408	1419
NODE_7999_length_1966_cov_5.025433	1	p2	(TC)11	22	1941	1962
NODE_8023_length_1477_cov_4.655383	1	p1	(A)10	10	6	15
NODE_8023_length_1477_cov_4.655383	2	c	(CA)17(TA)8gacatacatacatag(AC)15	95	889	983
NODE_8023_length_1477_cov_4.655383	3	p1	(T)10	10	1482	1491
NODE_8033_length_1168_cov_4.203767	1	c	(C)13accccac(CA)13(TA)8	62	484	545
NODE_8064_length_1020_cov_4.848039	1	p1	(A)10	10	1023	1032
NODE_8065_length_2534_cov_4.621942	1	c	(TC)13tt(TA)8	44	2428	2471
NODE_8145_length_1064_cov_4.985902	1	p2	(TA)14	28	1040	1067
NODE_8146_length_1819_cov_5.291919	1	p2	(AG)6	12	1779	1790
NODE_8262_length_1653_cov_4.991530	1	p2	(TA)11	22	1	22
NODE_8262_length_1653_cov_4.991530	2	p1	(T)11	11	1635	1645
NODE_8265_length_2076_cov_4.657033	1	p1	(A)11	11	417	427
NODE_8283_length_953_cov_13.055614	1	p2	(AT)9	18	526	543
NODE_8319_length_3297_cov_5.277828	1	p1	(A)10	10	33	42
NODE_8352_length_1065_cov_4.764319	1	p2	(TA)9	18	832	849
NODE_8352_length_1065_cov_4.764319	2	p2	(AT)8	16	1076	1091
NODE_8429_length_1016_cov_4.431102	1	p1	(A)10	10	28	37
NODE_8429_length_1016_cov_4.431102	2	p2	(AT)8	16	1051	1066
NODE_8430_length_3922_cov_4.671086	1	p2	(TC)9	18	2189	2206
NODE_8431_length_1736_cov_4.739631	1	p2	(AG)9	18	712	729
NODE_8431_length_1736_cov_4.739631	2	p2	(TC)17	34	1165	1198
NODE_8459_length_1212_cov_5.179868	1	p1	(T)14	14	41	54
NODE_8463_length_1492_cov_4.197721	1	c	(TA)6attagagaaattatcatataataatggataagttgcaacagaaaatgagaagttaatttagtcgttatggtatgaatttttgaccccaaaaaagtttt(GA)22	154	658	811
NODE_8465_length_1038_cov_5.326590	1	p2	(AT)6	12	767	778
NODE_8478_length_1910_cov_4.153927	1	p2	(TC)6	12	639	650
NODE_8478_length_1910_cov_4.153927	2	c	(TC)8tttttttg(AT)10	44	1619	1662
NODE_8622_length_2436_cov_4.685961	1	p1	(T)10	10	2092	2101
NODE_8636_length_998_cov_4.917836	1	p2	(CT)8	16	91	106
NODE_8722_length_1668_cov_4.591727	1	c	(CA)12(TA)10	44	1669	1712
NODE_8731_length_1368_cov_5.103801	1	p1	(A)11	11	356	366
NODE_8732_length_2331_cov_5.356071	1	p3	(AAG)6	18	1271	1288
NODE_8734_length_2052_cov_4.986355	1	p2	(CA)6	12	898	909
NODE_8734_length_2052_cov_4.986355	2	p1	(A)10	10	1192	1201
NODE_8755_length_3702_cov_5.145057	1	p2	(TC)8	16	175	190
NODE_8755_length_3702_cov_5.145057	2	p2	(TG)6	12	1691	1702
NODE_8802_length_2713_cov_4.487283	1	p1	(A)10	10	1936	1945
NODE_8809_length_2045_cov_4.793154	1	c	(CT)7cccccctctctctgtctctcc(CT)7	49	22	70
NODE_8830_length_1761_cov_4.960250	1	p2	(AT)13	26	161	186
NODE_8999_length_1254_cov_4.577353	1	p1	(A)11	11	6	16
NODE_9056_length_1670_cov_4.841916	1	p2	(CT)11	22	758	779
NODE_9058_length_2006_cov_5.281655	1	p2	(CT)7	14	1983	1996
NODE_9079_length_997_cov_5.043129	1	p1	(T)15	15	1006	1020
NODE_9114_length_2906_cov_5.108052	1	p1	(A)11	11	1	11
NODE_9132_length_4009_cov_5.082066	1	p1	(T)14	14	2454	2467
NODE_9132_length_4009_cov_5.082066	2	p2	(CT)6	12	3433	3444
NODE_9133_length_4488_cov_4.874777	1	c	(TG)8(TA)9	34	469	502
NODE_9171_length_1465_cov_4.811604	1	p1	(A)10	10	1322	1331
NODE_9197_length_1964_cov_5.192974	1	p2	(AT)6	12	1341	1352
NODE_9232_length_1181_cov_4.466554	1	p1	(A)11	11	264	274
NODE_9232_length_1181_cov_4.466554	2	p1	(A)15	15	585	599
NODE_9239_length_1709_cov_5.853130	1	p2	(GA)6	12	1019	1030
NODE_9242_length_1151_cov_4.509122	1	p3	(CTT)6	18	918	935
NODE_9350_length_1643_cov_5.304930	1	p2	(TC)8	16	1	16
NODE_9367_length_1296_cov_6.115741	1	p2	(AG)8	16	6	21
NODE_9369_length_2845_cov_4.974692	1	p1	(T)10	10	421	430
NODE_9428_length_1197_cov_4.398496	1	p1	(A)11	11	1188	1198
NODE_9475_length_2361_cov_8.832274	1	c	(T)10gttttatttcctcattctttctatttgttattctcgtgataaagaa(T)11	67	174	240
NODE_9475_length_2361_cov_8.832274	2	p2	(AT)15	30	871	900
NODE_9475_length_2361_cov_8.832274	3	p1	(T)14	14	1856	1869
NODE_9504_length_986_cov_5.016227	1	c	(TA)9(ATT)5	33	646	678
NODE_9504_length_986_cov_5.016227	2	p2	(TA)14	28	968	995
NODE_9515_length_2533_cov_4.727201	1	p2	(TA)6	12	110	121
NODE_9515_length_2533_cov_4.727201	2	p2	(AG)6	12	1161	1172
NODE_9515_length_2533_cov_4.727201	3	p1	(A)10	10	1619	1628
NODE_9515_length_2533_cov_4.727201	4	p2	(AG)8	16	2032	2047
NODE_9519_length_2592_cov_5.128858	1	p1	(T)10	10	2301	2310
NODE_9532_length_3031_cov_4.790168	1	p2	(AG)6	12	1441	1452
NODE_9532_length_3031_cov_4.790168	2	p1	(A)11	11	2494	2504
NODE_9603_length_1004_cov_4.077689	1	p2	(TC)9	18	114	131
NODE_9603_length_1004_cov_4.077689	2	p2	(GA)7	14	420	433
NODE_9603_length_1004_cov_4.077689	3	p2	(AG)10	20	670	689
NODE_9761_length_1145_cov_4.801747	1	p1	(T)10	10	17	26
NODE_9829_length_1039_cov_4.798845	1	p1	(A)10	10	419	428
NODE_9867_length_5516_cov_4.998368	1	p1	(A)10	10	2129	2138
NODE_9926_length_2054_cov_4.819377	1	p1	(A)12	12	247	258
NODE_9935_length_1209_cov_4.214227	1	p1	(A)14	14	221	234
NODE_9945_length_1441_cov_4.656488	1	p2	(AT)13	26	473	498
NODE_9987_length_1848_cov_5.378788	1	p1	(T)10	10	121	130
NODE_9988_length_1064_cov_4.645677	1	p1	(A)11	11	210	220
NODE_9988_length_1064_cov_4.645677	2	p1	(A)12	12	542	553
NODE_9988_length_1064_cov_4.645677	3	p1	(T)10	10	1102	1111
NODE_10015_length_975_cov_4.216410	1	c	(CT)6cctgtgtctg(TA)6	34	94	127
NODE_10032_length_1851_cov_9.770935	1	p2	(GT)8	16	198	213
NODE_10032_length_1851_cov_9.770935	2	p1	(A)14	14	316	329
NODE_10049_length_2361_cov_5.401101	1	p1	(T)11	11	2203	2213
NODE_10084_length_1817_cov_4.516235	1	p1	(T)10	10	1542	1551
NODE_10108_length_3009_cov_4.659023	1	p1	(T)10	10	1965	1974
NODE_10136_length_1825_cov_8.263014	1	p2	(TA)9	18	297	314
NODE_10136_length_1825_cov_8.263014	2	p1	(A)11	11	615	625
NODE_10146_length_1617_cov_4.494743	1	p1	(T)10	10	63	72
NODE_10146_length_1617_cov_4.494743	2	p2	(TA)7	14	820	833
NODE_10347_length_1395_cov_4.553405	1	p1	(T)10	10	594	603
NODE_10354_length_2404_cov_5.457571	1	p3	(TCC)5	15	1698	1712
NODE_10364_length_1030_cov_5.835922	1	p2	(TC)16	32	606	637
NODE_10365_length_1026_cov_4.604289	1	c	(TC)8(TA)10	36	177	212
NODE_10369_length_1119_cov_4.611260	1	p1	(T)12	12	1	12
NODE_10406_length_1342_cov_4.190760	1	p2	(GA)8	16	216	231
NODE_10406_length_1342_cov_4.190760	2	p1	(A)14	14	1009	1022
NODE_10483_length_1698_cov_5.505301	1	c	(A)10ggacagattaagctaagaaacaagctaaaattatatattatgaatacatacatatatatataataagtatac(TA)6	94	32	125
NODE_10485_length_1001_cov_4.941059	1	p1	(A)10	10	144	153
NODE_10485_length_1001_cov_4.941059	2	p1	(T)11	11	1045	1055
NODE_10486_length_963_cov_4.941848	1	p2	(AC)8	16	721	736
NODE_10574_length_2143_cov_4.647223	1	c	(AT)6(TA)7	26	888	913
NODE_10689_length_3593_cov_5.319510	1	p2	(AT)9	18	401	418
NODE_10689_length_3593_cov_5.319510	2	p1	(A)12	12	1853	1864
NODE_10756_length_1554_cov_4.900901	1	p2	(AG)6	12	1431	1442
NODE_10760_length_3095_cov_4.020355	1	p1	(T)12	12	1580	1591
NODE_10770_length_1805_cov_5.135180	1	p2	(TC)17	34	180	213
NODE_10887_length_2341_cov_5.140538	1	p1	(T)10	10	2383	2392
NODE_10898_length_1997_cov_4.990486	1	c	(GT)6(GA)9c(AAG)7	52	1545	1596
NODE_10905_length_1051_cov_4.423406	1	p1	(T)11	11	339	349
NODE_11036_length_2174_cov_4.857866	1	c	(A)10cccac(A)10	25	2200	2224
NODE_11055_length_2688_cov_5.837798	1	p3	(AAG)8	24	865	888
NODE_11061_length_1075_cov_4.565581	1	c	(AG)6aa(AG)8	30	469	498
NODE_11084_length_1721_cov_4.363742	1	p2	(TG)8	16	586	601
NODE_11129_length_1625_cov_5.081846	1	p1	(A)10	10	214	223
NODE_11131_length_982_cov_3.969450	1	c	(T)11acttttaaaaatcttcaattttttaaaagtttatcatcttttttcttc(T)10	69	8	76
NODE_11166_length_1351_cov_5.359734	1	p1	(A)11	11	728	738
NODE_11184_length_1806_cov_4.968992	1	p1	(A)10	10	518	527
NODE_11188_length_1661_cov_4.245033	1	p2	(AT)7	14	1	14
NODE_11237_length_2177_cov_4.649058	1	p1	(T)10	10	12	21
NODE_11283_length_1980_cov_4.920202	1	c	(TGATC)6tgctctgctctgcttctggattcatctacgccttggcgtttcctgcattcatttagcctctctctg(TC)7	110	1064	1173
NODE_11283_length_1980_cov_4.920202	2	p2	(TC)6	12	1418	1429
NODE_11283_length_1980_cov_4.920202	3	p1	(A)10	10	1627	1636
NODE_11296_length_1315_cov_5.650950	1	p2	(TA)6	12	1155	1166
NODE_11350_length_1016_cov_3.936024	1	p1	(A)11	11	965	975
NODE_11357_length_1005_cov_5.104477	1	p3	(GAA)5	15	1032	1046
NODE_11433_length_2506_cov_4.793695	1	p1	(A)10	10	873	882
NODE_11462_length_1279_cov_4.800625	1	p2	(TG)11	22	647	668
NODE_11462_length_1279_cov_4.800625	2	p1	(T)10	10	1261	1270
NODE_11469_length_2675_cov_5.490841	1	p1	(T)10	10	770	779
NODE_11476_length_1803_cov_5.046034	1	c	(TCTG)5(TC)9	38	1139	1176
NODE_11476_length_1803_cov_5.046034	2	p2	(TC)7	14	1411	1424
NODE_11557_length_2500_cov_4.962000	1	p2	(TC)17	34	201	234
NODE_11616_length_1682_cov_4.139120	1	p3	(TGG)7	21	1612	1632
NODE_11638_length_2148_cov_4.911546	1	p1	(A)10	10	533	542
NODE_11638_length_2148_cov_4.911546	2	p2	(GA)10	20	1903	1922
NODE_11638_length_2148_cov_4.911546	3	c	(AG)7attg(AGA)5	33	2124	2156
NODE_11664_length_1284_cov_4.412773	1	p1	(A)10	10	99	108
NODE_11673_length_1845_cov_5.263415	1	p2	(AC)7	14	1	14
NODE_11780_length_4638_cov_5.311772	1	p3	(GGT)8	24	4211	4234
NODE_11780_length_4638_cov_5.311772	2	p2	(AT)10	20	4515	4534
NODE_11781_length_1406_cov_4.573969	1	p1	(T)11	11	889	899
NODE_11782_length_2424_cov_5.250825	1	p1	(A)10	10	1235	1244
NODE_11784_length_1168_cov_5.446062	1	p1	(A)14	14	1	14
NODE_11792_length_1064_cov_4.052631	1	c	(T)14cggtttttgggtgaatgagaggtttaaacaag(T)10	56	519	574
NODE_11869_length_1776_cov_4.871622	1	p1	(A)11	11	99	109
NODE_11871_length_3538_cov_5.110232	1	p2	(TA)8	16	2022	2037
NODE_11871_length_3538_cov_5.110232	2	p1	(A)16	16	3577	3592
NODE_11914_length_3127_cov_9.983051	1	p2	(TG)8	16	564	579
NODE_11914_length_3127_cov_9.983051	2	p3	(AGA)5	15	2573	2587
NODE_11919_length_1672_cov_4.050838	1	p1	(A)10	10	445	454
NODE_11949_length_1410_cov_4.531206	1	p3	(TAA)6	18	823	840
NODE_12007_length_2494_cov_4.782278	1	p2	(AG)12	24	2254	2277
NODE_12040_length_2234_cov_4.782901	1	p2	(GA)6	12	453	464
NODE_12040_length_2234_cov_4.782901	2	p2	(TC)10	20	1839	1858
NODE_12041_length_1345_cov_4.925651	1	p1	(A)10	10	351	360
NODE_12090_length_1203_cov_4.077307	1	p1	(T)10	10	1189	1198
NODE_12104_length_1114_cov_4.546679	1	p1	(T)12	12	661	672
NODE_12107_length_3480_cov_5.342816	1	p1	(A)11	11	2132	2142
NODE_12159_length_2035_cov_3.804914	1	p2	(TA)14	28	1690	1717
NODE_12194_length_1803_cov_4.988907	1	p1	(T)10	10	1846	1855
NODE_12230_length_3123_cov_5.592700	1	p2	(AC)7	14	2132	2145
NODE_12238_length_2570_cov_5.178988	1	p2	(GT)8	16	1775	1790
NODE_12240_length_951_cov_5.685594	1	p1	(A)11	11	1	11
NODE_12267_length_2178_cov_5.223599	1	p1	(A)14	14	180	193
NODE_12281_length_1851_cov_4.990816	1	c	(AT)8catagtcacgaaaaacatgttttttttggaaaaagcacattaaaaatgtggaaaataagttaaccgaaaaaggcaaaaaacgtg(T)11	111	1737	1847
NODE_12321_length_1251_cov_4.362910	1	p2	(TA)6	12	694	705
NODE_12363_length_1844_cov_5.471800	1	p2	(TC)6	12	941	952
NODE_12426_length_2185_cov_5.140503	1	p1	(A)10	10	25	34
NODE_12457_length_1757_cov_5.142288	1	p1	(T)13	13	1	13
NODE_12465_length_1082_cov_5.461183	1	c	(CA)10(GA)16	52	1	52
NODE_12465_length_1082_cov_5.461183	2	p1	(A)10	10	559	568
NODE_12468_length_2488_cov_4.751206	1	p1	(A)12	12	2512	2523
NODE_12488_length_1989_cov_5.355455	1	c	(TA)7tgtatg(TA)14tg(TA)6	62	40	101
NODE_12520_length_1085_cov_4.978802	1	p2	(AT)7	14	124	137
NODE_12542_length_2063_cov_4.742123	1	p1	(A)13	13	203	215
NODE_12577_length_1732_cov_4.160508	1	p1	(A)14	14	1773	1786
NODE_12581_length_4197_cov_9.590422	1	p2	(CT)6	12	3475	3486
NODE_12608_length_3547_cov_4.980547	1	c	(GAA)6aaggaagaagagatcaaggtagggaga(CT)10	65	512	576
NODE_12633_length_2504_cov_4.521166	1	c	(CT)8cc(CT)8	34	637	670
NODE_12656_length_2836_cov_4.900211	1	p2	(TA)8	16	1782	1797
NODE_12682_length_1003_cov_4.630110	1	p1	(T)12	12	683	694
NODE_12789_length_3263_cov_5.465522	1	c	(AC)7(TC)14(AC)6	54	500	553
NODE_12789_length_3263_cov_5.465522	2	p1	(A)10	10	2784	2793
NODE_12852_length_1368_cov_5.035819	1	p2	(AT)9	18	1398	1415
NODE_12873_length_2907_cov_4.957000	1	p1	(A)12	12	526	537
NODE_12880_length_1996_cov_5.385772	1	p1	(T)10	10	1527	1536
NODE_12881_length_2784_cov_4.923132	1	p1	(A)11	11	2828	2838
NODE_12882_length_1352_cov_4.174556	1	p2	(TC)11	22	1127	1148
NODE_12885_length_1248_cov_5.140224	1	p2	(TA)6	12	97	108
NODE_12914_length_1424_cov_3.817416	1	c	(TCT)6agcctttcgaaccgtagaacttgtctccaaccaatgtcccaaacattaccattgttgttc(T)11	89	519	607
NODE_12914_length_1424_cov_3.817416	2	p1	(T)10	10	1062	1071
NODE_12914_length_1424_cov_3.817416	3	p2	(AG)6	12	1453	1464
NODE_12940_length_1571_cov_5.896881	1	p1	(T)11	11	999	1009
NODE_12946_length_2618_cov_4.776547	1	p2	(AC)6	12	938	949
NODE_12967_length_1098_cov_4.815118	1	p2	(AG)8	16	1051	1066
NODE_12969_length_1194_cov_4.404522	1	p2	(CT)7	14	335	348
NODE_12969_length_1194_cov_4.404522	2	p2	(AT)15	30	514	543
NODE_12969_length_1194_cov_4.404522	3	c	(CT)10ttt(AC)9	41	767	807
NODE_12969_length_1194_cov_4.404522	4	c	(AC)15(AT)9	48	1200	1247
NODE_12983_length_1601_cov_4.797626	1	p2	(GA)6	12	1081	1092
NODE_13043_length_1542_cov_5.466278	1	p1	(A)11	11	1558	1568
NODE_13058_length_1383_cov_4.851048	1	p2	(GA)6	12	1380	1391
NODE_13081_length_3090_cov_5.411327	1	p2	(TG)6	12	521	532
NODE_13081_length_3090_cov_5.411327	2	p1	(T)10	10	773	782
NODE_13111_length_1161_cov_4.763135	1	p4	(GTGC)5	20	1042	1061
NODE_13183_length_2119_cov_4.810288	1	p3	(AAG)5	15	71	85
NODE_13242_length_1136_cov_4.735916	1	p2	(AG)10	20	668	687
NODE_13295_length_1587_cov_5.006931	1	p2	(TA)7	14	1148	1161
NODE_13311_length_1661_cov_4.989163	1	p1	(T)14	14	1624	1637
NODE_13403_length_1254_cov_3.834131	1	c	(TA)12gaatctgtac(AT)15	64	972	1035
NODE_13403_length_1254_cov_3.834131	2	c*	(AATA)8(AT)12*	53	1255	1307
NODE_13404_length_1866_cov_5.745981	1	p1	(A)10	10	1152	1161
NODE_13430_length_2525_cov_4.914852	1	p2	(AT)7	14	1567	1580
NODE_13465_length_1076_cov_4.526952	1	p2	(GA)6	12	563	574
NODE_13673_length_2389_cov_5.899121	1	p2	(TA)7	14	1992	2005
NODE_13674_length_1488_cov_4.642473	1	p1	(A)10	10	1	10
NODE_13718_length_1905_cov_4.294488	1	p2	(TA)13	26	1463	1488
NODE_13718_length_1905_cov_4.294488	2	c	(AT)11aaagcagagatattatctggctttgataataaatcaagaaacctatgcagcattgagaacaactttgagtgtcct(AG)6	109	1720	1828
NODE_13788_length_1891_cov_5.829191	1	p1	(T)10	10	1182	1191
NODE_13788_length_1891_cov_5.829191	2	p2	(GA)10	20	1401	1420
NODE_13796_length_1988_cov_4.800805	1	p1	(G)10	10	14	23
NODE_13796_length_1988_cov_4.800805	2	p1	(A)10	10	125	134
NODE_13806_length_1760_cov_4.443750	1	p1	(T)10	10	24	33
NODE_13806_length_1760_cov_4.443750	2	p2	(AG)7	14	1678	1691
NODE_13823_length_2807_cov_11.482009	1	p2	(TA)23	46	1	46
NODE_13823_length_2807_cov_11.482009	2	p1	(A)11	11	900	910
NODE_13823_length_2807_cov_11.482009	3	p1	(T)11	11	2406	2416
NODE_13857_length_1289_cov_5.082234	1	p2	(AT)13	26	397	422
NODE_13890_length_1598_cov_4.352315	1	c	(CT)13aaaccagagccatttgcaatttgagaccatcgtcatcaccggttcttgctatctacattgcgacgcgtcggaagatccccgcg(CT)12	133	1289	1421
NODE_13909_length_3830_cov_4.550392	1	p1	(A)10	10	1722	1731
NODE_13909_length_3830_cov_4.550392	2	p1	(T)11	11	1925	1935
NODE_13909_length_3830_cov_4.550392	3	p2	(TA)8	16	3003	3018
NODE_13909_length_3830_cov_4.550392	4	p2	(AG)25	50	3834	3883
NODE_13914_length_1809_cov_4.766722	1	p1	(A)10	10	420	429
NODE_14043_length_1370_cov_5.054745	1	p2	(GA)7	14	450	463
NODE_14079_length_989_cov_3.796764	1	p1	(T)11	11	33	43
NODE_14080_length_1707_cov_5.174575	1	p1	(T)11	11	1704	1714
NODE_14367_length_966_cov_4.321946	1	p1	(T)17	17	245	261
NODE_14367_length_966_cov_4.321946	2	p2	(TA)7	14	978	991
NODE_14368_length_1080_cov_7.010185	1	p2	(TA)16	32	54	85
NODE_14444_length_1305_cov_4.280460	1	p1	(A)10	10	144	153
NODE_14444_length_1305_cov_4.280460	2	p2	(AC)7	14	636	649
NODE_14449_length_1208_cov_4.952815	1	p2	(AC)7	14	929	942
NODE_14470_length_1071_cov_4.784314	1	p1	(T)11	11	866	876
NODE_14480_length_1028_cov_5.032101	1	c	(CT)6t(TA)11	35	799	833
NODE_14499_length_4945_cov_5.142366	1	p2	(TC)7	14	1268	1281
NODE_14499_length_4945_cov_5.142366	2	p1	(A)10	10	3233	3242
NODE_14515_length_1118_cov_4.771914	1	p1	(T)10	10	961	970
NODE_14530_length_1624_cov_4.678571	1	p1	(A)16	16	121	136
NODE_14534_length_2561_cov_5.176103	1	p1	(T)15	15	2600	2614
NODE_14556_length_1407_cov_4.425018	1	p1	(A)11	11	1245	1255
NODE_14647_length_2705_cov_4.960074	1	p2	(AG)9	18	1667	1684
NODE_14684_length_1293_cov_5.780356	1	p3	(TTC)5	15	1024	1038
NODE_14809_length_1374_cov_4.355895	1	p2	(CT)8	16	130	145
NODE_14809_length_1374_cov_4.355895	2	p2	(TC)18	36	567	602
NODE_14839_length_1973_cov_5.490117	1	p2	(CT)10	20	806	825
NODE_14855_length_2497_cov_4.369644	1	c	(TA)7catatatac(AT)15	53	1	53
NODE_14894_length_2760_cov_4.871377	1	p1	(T)10	10	2605	2614
NODE_14895_length_2566_cov_5.925955	1	p2	(CT)12	24	1714	1737
NODE_14933_length_4608_cov_5.623698	1	p1	(T)25	25	4638	4662
NODE_14934_length_1916_cov_5.141440	1	p1	(T)11	11	33	43
NODE_14941_length_2131_cov_4.903332	1	p2	(TC)6	12	8	19
NODE_14941_length_2131_cov_4.903332	2	p2	(GA)6	12	851	862
NODE_14961_length_3725_cov_5.758121	1	c*	(AT)9(TATT)9*	51	1	51
NODE_14961_length_3725_cov_5.758121	2	p2	(CT)9	18	745	762
NODE_14961_length_3725_cov_5.758121	3	c	(CT)7ttg(AC)18	53	3470	3522
NODE_14994_length_1144_cov_4.682693	1	p1	(T)10	10	47	56
NODE_14996_length_1519_cov_5.431863	1	p1	(T)18	18	1556	1573
NODE_15036_length_1960_cov_5.545918	1	p2	(GA)13	26	1	26
NODE_15036_length_1960_cov_5.545918	2	p2	(TC)10	20	427	446
NODE_15061_length_2399_cov_4.714464	1	p2	(GA)22	44	1161	1204
NODE_15164_length_4282_cov_5.641056	1	p2	(CT)19	38	2890	2927
NODE_15164_length_4282_cov_5.641056	2	p2	(CA)13	26	3449	3474
NODE_15184_length_1379_cov_5.088470	1	c	(AT)10(AC)16	52	306	357
NODE_15253_length_1682_cov_6.060048	1	p3	(AGA)5	15	1706	1720
NODE_15299_length_1031_cov_4.873909	1	p2	(AT)6	12	505	516
NODE_15299_length_1031_cov_4.873909	2	p2	(TC)13	26	1054	1079
NODE_15320_length_1961_cov_4.393167	1	p2	(TA)7	14	1671	1684
NODE_15339_length_1007_cov_4.311817	1	p2	(GA)6	12	648	659
NODE_15423_length_1685_cov_5.143620	1	p1	(T)13	13	1718	1730
NODE_15455_length_1911_cov_4.852433	1	p2	(AT)8	16	1025	1040
NODE_15455_length_1911_cov_4.852433	2	p2	(GA)7	14	1547	1560
NODE_15455_length_1911_cov_4.852433	3	p2	(CT)9	18	1682	1699
NODE_15494_length_2121_cov_4.763791	1	p2	(TA)24	48	1	48
NODE_15503_length_1772_cov_4.182844	1	p2	(CT)16	32	837	868
NODE_15506_length_1357_cov_3.703758	1	p1	(A)11	11	1	11
NODE_15506_length_1357_cov_3.703758	2	p2	(TA)8	16	434	449
NODE_15584_length_1526_cov_5.049803	1	c	(T)19gtcaaaatcaagcatcaagcataggttggtcactgtgggtataaatatatgcgcatatgtgtgcacgcac(GT)6	101	2	102
NODE_15597_length_1986_cov_4.561934	1	c*	(AT)8(TATT)5*	33	862	894
NODE_15597_length_1986_cov_4.561934	2	c	(A)11tattcatctggccacaaaggtagtcacctgattttcaatttatatataaataaaataaataaata(AT)6	88	1041	1128
NODE_15597_length_1986_cov_4.561934	3	p2	(GA)6	12	1720	1731
NODE_15640_length_1015_cov_4.773399	1	p1	(A)10	10	1054	1063
NODE_15645_length_964_cov_4.680498	1	c	(A)10ggatataccgagaagagaataaggttagttgg(A)10	52	179	230
NODE_15645_length_964_cov_4.680498	2	c	(A)10gttacatataatttgacgagtaacc(A)13	48	429	476
NODE_15645_length_964_cov_4.680498	3	p1	(T)10	10	987	996
NODE_15649_length_1442_cov_3.818308	1	p1	(A)11	11	791	801
NODE_15649_length_1442_cov_3.818308	2	c	(A)12ctttaatatat(A)10	33	1026	1058
NODE_15650_length_1769_cov_5.466930	1	p2	(TA)14	28	59	86
NODE_15650_length_1769_cov_5.466930	2	p2	(AG)7	14	1254	1267
NODE_15691_length_2366_cov_4.738377	1	p2	(GA)14	28	837	864
NODE_15721_length_1738_cov_4.491945	1	p2	(TC)12	24	332	355
NODE_15752_length_1688_cov_5.333531	1	p2	(AC)6	12	323	334
NODE_15771_length_1247_cov_4.494788	1	c	(TA)13(TG)8	42	1	42
NODE_15789_length_1839_cov_4.551930	1	p1	(A)10	10	1867	1876
NODE_15791_length_4495_cov_5.550834	1	p1	(A)12	12	3910	3921
NODE_15794_length_1266_cov_4.696682	1	p1	(T)14	14	8	21
NODE_15794_length_1266_cov_4.696682	2	p2	(GA)6	12	806	817
NODE_15794_length_1266_cov_4.696682	3	p1	(A)13	13	1045	1057
NODE_15794_length_1266_cov_4.696682	4	p1	(T)10	10	1204	1213
NODE_15796_length_1061_cov_4.724788	1	p1	(T)10	10	129	138
NODE_15796_length_1061_cov_4.724788	2	p3	(AAC)5	15	897	911
NODE_15881_length_1012_cov_4.352767	1	c	(AT)13(AC)6	38	52	89
NODE_15881_length_1012_cov_4.352767	2	p2	(AG)6	12	211	222
NODE_15965_length_1068_cov_4.099251	1	p3	(CGC)5	15	121	135
NODE_15965_length_1068_cov_4.099251	2	p2	(TA)13	26	526	551
NODE_15965_length_1068_cov_4.099251	3	p1	(A)17	17	1105	1121
NODE_16012_length_1236_cov_5.631068	1	p1	(A)10	10	341	350
NODE_16012_length_1236_cov_5.631068	2	p1	(T)11	11	1270	1280
NODE_16095_length_2084_cov_5.107486	1	p2	(TC)9	18	306	323
NODE_16095_length_2084_cov_5.107486	2	p2	(CT)7	14	995	1008
NODE_16150_length_1560_cov_4.476923	1	c	(A)12tcaacaaatgtcataaatttcatttggcat(TG)7	56	1251	1306
NODE_16402_length_1269_cov_4.166273	1	p1	(T)11	11	1281	1291
NODE_16404_length_2408_cov_5.203904	1	p1	(A)11	11	2089	2099
NODE_16443_length_1092_cov_4.036630	1	p1	(T)10	10	747	756
NODE_16446_length_1424_cov_3.519663	1	p2	(AT)14	28	260	287
NODE_16449_length_2042_cov_4.476494	1	c	(TA)8(AT)12	40	1958	1997
NODE_16450_length_1783_cov_4.265283	1	c	(TA)8(GA)10	36	579	614
NODE_16472_length_1663_cov_4.605532	1	c	(AT)8acatataaagagagatataaatttc(AT)10aa(AG)8	79	1429	1507
NODE_16472_length_1663_cov_4.605532	2	p2	(TA)6	12	1626	1637
NODE_16535_length_1033_cov_4.967086	1	c	(TC)9acacacacacatgttcaactctttattgggacaaccaggacattttttccatctcttttgtaatcgtatctaatgtctatatatat(AC)6	116	543	658
NODE_16537_length_2816_cov_4.305043	1	p2	(TC)6	12	851	862
NODE_16537_length_2816_cov_4.305043	2	c	(TA)9(GA)7tagagagagagt(GA)9gcgagt(GA)7	82	1428	1509
NODE_16539_length_1263_cov_4.558195	1	p1	(T)10	10	37	46
NODE_16540_length_2641_cov_4.555093	1	p1	(A)13	13	280	292
NODE_16540_length_2641_cov_4.555093	2	p3	(AAC)5	15	1495	1509
NODE_16541_length_1009_cov_4.253716	1	p1	(G)20	20	1044	1063
NODE_16688_length_1354_cov_5.165436	1	p2	(CT)9	18	1193	1210
NODE_16723_length_2168_cov_4.553967	1	p3	(TTA)5	15	1230	1244
NODE_16728_length_2500_cov_4.763600	1	p2	(AT)15	30	1281	1310
NODE_16788_length_1731_cov_4.680532	1	p2	(TA)6	12	384	395
NODE_16788_length_1731_cov_4.680532	2	p1	(T)11	11	515	525
NODE_16831_length_1129_cov_4.220549	1	p2	(TC)6	12	436	447
NODE_16833_length_3095_cov_5.257189	1	p1	(T)11	11	204	214
NODE_16833_length_3095_cov_5.257189	2	p2	(AT)7	14	940	953
NODE_16837_length_1863_cov_4.679549	1	p2	(TC)10	20	1730	1749
NODE_16842_length_1413_cov_5.150743	1	c	(AC)8(AT)7	30	1030	1059
NODE_16855_length_2548_cov_5.564364	1	p1	(G)11	11	1134	1144
NODE_16889_length_1690_cov_5.305917	1	p1	(T)10	10	542	551
NODE_16889_length_1690_cov_5.305917	2	c	(CT)9cag(AC)8	37	1614	1650
NODE_16979_length_1177_cov_5.261682	1	p3	(TTC)6	18	484	501
NODE_16979_length_1177_cov_5.261682	2	p1	(T)12	12	1164	1175
NODE_17039_length_992_cov_4.628024	1	p2	(AG)11	22	473	494
NODE_17042_length_1170_cov_4.091453	1	p2	(TA)14	28	168	195
NODE_17049_length_2007_cov_5.362232	1	c	(TA)14(CA)13	54	1	54
NODE_17056_length_988_cov_4.268219	1	p2	(GA)7	14	262	275
NODE_17056_length_988_cov_4.268219	2	p1	(A)15	15	641	655
NODE_17086_length_2398_cov_4.764804	1	c	(TC)16(TA)10	52	2401	2452
NODE_17092_length_3794_cov_5.275435	1	p3	(TCT)6	18	377	394
NODE_17099_length_1851_cov_4.462453	1	p1	(T)16	16	38	53
NODE_17175_length_2396_cov_4.488314	1	p1	(A)10	10	837	846
NODE_17183_length_4123_cov_4.932088	1	p1	(T)11	11	3636	3646
NODE_17196_length_1743_cov_4.324728	1	c	(CTT)5catattgatcctcgaattttcttcgtcctgtttatcttactgttcattaggg(A)11	78	549	626
NODE_17196_length_1743_cov_4.324728	2	p3	(CTC)5	15	871	885
NODE_17196_length_1743_cov_4.324728	3	c	(AT)8ac(AT)7	32	1147	1178
NODE_17307_length_1572_cov_4.561069	1	p1	(T)10	10	378	387
NODE_17307_length_1572_cov_4.561069	2	p1	(T)11	11	1323	1333
NODE_17354_length_3487_cov_5.137367	1	p3	(GAA)12	36	486	521
NODE_17439_length_1367_cov_5.507681	1	p2	(TC)6	12	224	235
NODE_17525_length_987_cov_5.195542	1	p1	(T)10	10	24	33
NODE_17561_length_2634_cov_5.552772	1	p1	(A)11	11	2676	2686
NODE_17562_length_1266_cov_4.660347	1	p1	(A)10	10	371	380
NODE_17566_length_1701_cov_4.918871	1	p1	(T)15	15	21	35
NODE_17569_length_2205_cov_4.756009	1	p1	(A)10	10	1705	1714
NODE_17575_length_1396_cov_4.118195	1	c	(TA)6a(AG)15	43	833	875
NODE_17575_length_1396_cov_4.118195	2	p2	(CT)12	24	1302	1325
NODE_17687_length_1373_cov_5.165331	1	p1	(A)10	10	165	174
NODE_17687_length_1373_cov_5.165331	2	p1	(A)10	10	289	298
NODE_17730_length_3423_cov_5.035057	1	p2	(GA)24	48	3428	3475
NODE_17742_length_2324_cov_5.244406	1	p1	(T)10	10	657	666
NODE_17776_length_1262_cov_17.055468	1	p3	(AGA)7	21	471	491
NODE_17816_length_1946_cov_4.796505	1	p2	(TC)7	14	1800	1813
NODE_17858_length_1389_cov_4.444924	1	p2	(AG)8	16	1	16
NODE_17858_length_1389_cov_4.444924	2	p1	(T)10	10	276	285
NODE_17897_length_1059_cov_5.367328	1	p2	(CT)6	12	612	623
NODE_17957_length_1208_cov_5.638245	1	p1	(A)10	10	784	793
NODE_17974_length_1281_cov_5.200624	1	p1	(T)10	10	990	999
NODE_17988_length_3077_cov_5.158596	1	p2	(AG)6	12	580	591
NODE_18016_length_1061_cov_3.927427	1	p1	(T)12	12	378	389
NODE_18016_length_1061_cov_3.927427	2	c	(A)10gaacctaac(CT)6	31	1020	1050
NODE_18040_length_1422_cov_5.898734	1	p1	(A)15	15	2	16
NODE_18040_length_1422_cov_5.898734	2	p2	(CA)7	14	1015	1028
NODE_18087_length_4247_cov_4.640687	1	p2	(TA)6	12	1	12
NODE_18087_length_4247_cov_4.640687	2	p2	(GA)17	34	3527	3560
NODE_18087_length_4247_cov_4.640687	3	p2	(GA)24	48	4254	4301
NODE_18120_length_1010_cov_4.575247	1	p1	(A)16	16	1	16
NODE_18134_length_1402_cov_3.849501	1	p1	(T)10	10	98	107
NODE_18134_length_1402_cov_3.849501	2	p2	(TC)6	12	1090	1101
NODE_18134_length_1402_cov_3.849501	3	p2	(AT)6	12	1242	1253
NODE_18135_length_1261_cov_4.291039	1	p2	(GT)9	18	837	854
NODE_18186_length_1213_cov_4.328112	1	p2	(AC)9	18	967	984
NODE_18208_length_1426_cov_5.239130	1	p2	(CA)10	20	252	271
NODE_18227_length_990_cov_4.226263	1	p1	(A)11	11	983	993
NODE_18284_length_1127_cov_5.635315	1	p2	(CT)6	12	745	756
NODE_18306_length_1169_cov_4.794696	1	p2	(TA)8	16	511	526
NODE_18364_length_3587_cov_5.185670	1	c	(CA)11aacacacac(AG)15	61	319	379
NODE_18364_length_3587_cov_5.185670	2	p2	(GA)8	16	1703	1718
NODE_18364_length_3587_cov_5.185670	3	p2	(TG)17	34	3191	3224
NODE_18400_length_3883_cov_4.985321	1	p1	(A)11	11	3216	3226
NODE_18401_length_1067_cov_4.778819	1	p1	(A)15	15	2	16
NODE_18401_length_1067_cov_4.778819	2	p1	(T)10	10	316	325
NODE_18409_length_1450_cov_5.697931	1	c	(CT)7(AT)7	28	176	203
NODE_18420_length_2037_cov_6.028473	1	p2	(AT)10	20	447	466
NODE_18420_length_2037_cov_6.028473	2	p2	(AG)7	14	1214	1227
NODE_18424_length_994_cov_3.703219	1	p2	(GA)20	40	1	40
NODE_18424_length_994_cov_3.703219	2	c	(CA)8(TA)6	28	664	691
NODE_18425_length_2243_cov_5.080696	1	p1	(A)10	10	247	256
NODE_18425_length_2243_cov_5.080696	2	p1	(A)10	10	851	860
NODE_18428_length_1467_cov_5.304022	1	p3	(AAG)6	18	211	228
NODE_18507_length_1477_cov_4.302640	1	c	(AC)7(AT)6	26	260	285
NODE_18526_length_3081_cov_5.346965	1	p1	(A)11	11	578	588
NODE_18634_length_1447_cov_4.364893	1	p1	(A)12	12	1050	1061
NODE_18683_length_1307_cov_4.925784	1	p2	(AT)9	18	164	181
NODE_18684_length_1127_cov_5.018633	1	p2	(TA)10	20	44	63
NODE_18701_length_1574_cov_8.080687	1	p1	(A)11	11	1298	1308
NODE_18740_length_1843_cov_4.737385	1	p1	(A)10	10	246	255
NODE_18756_length_3262_cov_5.389945	1	p1	(A)10	10	3046	3055
NODE_18758_length_3837_cov_4.754235	1	p1	(T)11	11	2041	2051
NODE_18761_length_1285_cov_5.857587	1	p2	(GA)9	18	866	883
NODE_18765_length_3036_cov_4.824111	1	p1	(T)11	11	3050	3060
NODE_18808_length_1252_cov_5.964057	1	p1	(A)12	12	942	953
NODE_18865_length_1480_cov_5.977703	1	p1	(A)10	10	631	640
NODE_18936_length_2603_cov_4.842489	1	p2	(CT)8	16	2082	2097
NODE_18981_length_985_cov_4.468020	1	c	(A)13ggttgagccactctaacgagtggaagtggtgaacaggtcaggaat(A)10	68	1	68
NODE_18989_length_1583_cov_4.415667	1	p2	(CT)9	18	367	384
NODE_19070_length_2313_cov_5.255512	1	c	(TC)15ttagctgcccctctagacccaggtgtgcctcattgtgccccttagccagaaagttttggcttcaccactgctctctttctctccctctccctctcc(CT)6	138	1933	2070
NODE_19238_length_1192_cov_4.930369	1	p2	(AG)24	48	1	48
NODE_19289_length_1749_cov_4.995426	1	p1	(T)12	12	247	258
NODE_19290_length_1292_cov_4.790247	1	p2	(GA)6	12	1115	1126
NODE_19302_length_1086_cov_5.153775	1	p1	(A)12	12	104	115
NODE_19309_length_2042_cov_4.415279	1	p1	(A)10	10	791	800
NODE_19324_length_1036_cov_4.354247	1	p1	(A)10	10	38	47
NODE_19324_length_1036_cov_4.354247	2	p2	(AG)6	12	236	247
NODE_19334_length_1055_cov_3.960190	1	p2	(TC)8	16	686	701
NODE_19372_length_1435_cov_4.640418	1	p2	(GT)6	12	96	107
NODE_19374_length_1123_cov_4.784506	1	p2	(AT)14	28	595	622
NODE_19461_length_1200_cov_5.540833	1	p2	(CT)6	12	1169	1180
NODE_19465_length_1382_cov_5.034732	1	p1	(T)10	10	458	467
NODE_19465_length_1382_cov_5.034732	2	p2	(TC)19	38	1350	1387
NODE_19540_length_2514_cov_4.555290	1	p2	(TA)13	26	106	131
NODE_19540_length_2514_cov_4.555290	2	p2	(AT)6	12	675	686
NODE_19540_length_2514_cov_4.555290	3	p2	(TA)10	20	889	908
NODE_19540_length_2514_cov_4.555290	4	p1	(T)14	14	2478	2491
NODE_19560_length_1002_cov_5.512974	1	p4	(AAAT)5	20	60	79
NODE_19582_length_3884_cov_5.055355	1	p1	(T)11	11	781	791
NODE_19582_length_3884_cov_5.055355	2	p2	(TG)6	12	2234	2245
NODE_19622_length_1353_cov_4.866223	1	p1	(T)10	10	369	378
NODE_19664_length_2061_cov_4.939350	1	p1	(A)11	11	17	27
NODE_19680_length_1098_cov_4.850637	1	p1	(A)12	12	1140	1151
NODE_19723_length_1475_cov_4.513898	1	p1	(A)10	10	115	124
NODE_19723_length_1475_cov_4.513898	2	p2	(AG)7	14	711	724
NODE_19771_length_1265_cov_4.548616	1	c	(AT)6a(CT)6	25	1161	1185
NODE_19772_length_1121_cov_3.555754	1	c	(AG)8ggagccattaagtgggccatagatcggagataagctgac(T)12	67	613	679
NODE_19783_length_1154_cov_5.295494	1	p2	(GA)16	32	1142	1173
NODE_19784_length_1741_cov_4.534176	1	p1	(T)15	15	10	24
NODE_19784_length_1741_cov_4.534176	2	p1	(T)14	14	1318	1331
NODE_19785_length_3128_cov_4.496803	1	p1	(T)10	10	3120	3129
NODE_19787_length_1811_cov_4.645500	1	p2	(GA)14	28	1466	1493
NODE_19830_length_1209_cov_5.522746	1	p1	(A)14	14	2	15
NODE_19831_length_1231_cov_5.251828	1	c	(CA)7(GA)6	26	768	793
NODE_19845_length_1422_cov_4.814346	1	p1	(C)11	11	170	180
NODE_19894_length_1993_cov_4.744606	1	p1	(T)11	11	2032	2042
NODE_19907_length_1683_cov_4.968509	1	c	(T)10actatgcatgcaccaggtagtgctcacaactcgatcgtgacaattggtgctttgctaaagtcagacccagtattctttttaggggtgcagtaagaa(T)13	119	1087	1205
NODE_19959_length_2037_cov_5.115366	1	p2	(GA)7	14	2072	2085
NODE_19960_length_3650_cov_5.010959	1	p2	(AT)16	32	2260	2291
NODE_20075_length_1155_cov_4.639827	1	p2	(AT)7	14	253	266
NODE_20075_length_1155_cov_4.639827	2	p1	(T)10	10	1130	1139
NODE_20080_length_2407_cov_4.929373	1	p3	(AAG)8	24	1582	1605
NODE_20104_length_2768_cov_4.640173	1	p1	(A)10	10	1290	1299
NODE_20109_length_1829_cov_5.283762	1	p1	(A)10	10	129	138
NODE_20140_length_969_cov_5.027864	1	p1	(T)13	13	682	694
NODE_20176_length_1700_cov_5.004706	1	c	(CA)13tccacacatg(CA)18tccacacacg(CA)10	102	598	699
NODE_20213_length_1024_cov_4.271484	1	p2	(AT)6	12	528	539
NODE_20213_length_1024_cov_4.271484	2	p2	(TC)6	12	691	702
NODE_20257_length_1193_cov_5.178542	1	p2	(TA)6	12	358	369
NODE_20260_length_1807_cov_4.899281	1	p2	(AG)8	16	1525	1540
NODE_20320_length_1834_cov_4.500000	1	c	(AT)15c(TG)6	43	1360	1402
NODE_20417_length_1102_cov_5.194192	1	p1	(T)14	14	23	36
NODE_20422_length_1451_cov_6.161957	1	c	(AG)8attcctcttgacatagatagatttgacaaccgcttgttgcgtgttcaagccaaaggttccaagaaaagttcaattatgtgt(GA)6	109	964	1072
NODE_20423_length_1807_cov_4.443276	1	p1	(A)18	18	1841	1858
NODE_20513_length_2362_cov_5.192210	1	p2	(TC)6	12	2178	2189
NODE_20560_length_2022_cov_5.026706	1	p1	(A)10	10	23	32
NODE_20611_length_2229_cov_4.995514	1	p2	(AT)6	12	921	932
NODE_20674_length_985_cov_3.520812	1	p2	(AT)13	26	1013	1038
NODE_20783_length_1279_cov_4.409695	1	p2	(AG)9	18	40	57
NODE_20783_length_1279_cov_4.409695	2	p2	(CT)7	14	1186	1199
NODE_20784_length_1146_cov_5.069808	1	p2	(AT)12	24	1176	1199
NODE_20815_length_1838_cov_5.599565	1	p1	(A)12	12	1188	1199
NODE_20828_length_1023_cov_4.881721	1	p1	(A)11	11	1	11
NODE_20924_length_1347_cov_4.723088	1	p2	(CT)9	18	196	213
NODE_20924_length_1347_cov_4.723088	2	p3	(AAT)6	18	1019	1036
NODE_20930_length_1526_cov_5.148099	1	p2	(TA)8	16	1184	1199
NODE_21017_length_2631_cov_4.055492	1	p1	(A)12	12	309	320
NODE_21062_length_1094_cov_5.154479	1	p2	(AC)6	12	1101	1112
NODE_21063_length_1016_cov_4.942914	1	p1	(A)14	14	1	14
NODE_21088_length_3729_cov_7.997318	1	p3	(AAT)10	30	859	888
NODE_21088_length_3729_cov_7.997318	2	p1	(T)14	14	1439	1452
NODE_21088_length_3729_cov_7.997318	3	p2	(GA)10	20	2606	2625
NODE_21102_length_1196_cov_4.797659	1	p1	(A)10	10	5	14
NODE_21115_length_2634_cov_5.121109	1	p1	(T)10	10	2537	2546
NODE_21116_length_2537_cov_4.924714	1	p1	(T)12	12	6	17
NODE_21122_length_1963_cov_4.592461	1	p2	(AG)8	16	346	361
NODE_21122_length_1963_cov_4.592461	2	p2	(GA)9	18	468	485
NODE_21125_length_1249_cov_5.052042	1	c	(TC)13(TA)13aaactaagggacttcttgtccccaatttttgtatctaggagattttttgtcctccaattttgatatacattctcattttctctgtctctct(CA)6	155	1	155
NODE_21140_length_1117_cov_9.151299	1	p2	(AT)8	16	1155	1170
NODE_21147_length_2263_cov_4.376050	1	p2	(TA)8	16	2039	2054
NODE_21147_length_2263_cov_4.376050	2	p3	(ATA)8	24	2239	2262
NODE_21191_length_2874_cov_5.759221	1	p1	(A)10	10	72	81
NODE_21273_length_3494_cov_4.836005	1	p2	(CT)7	14	3050	3063
NODE_21273_length_3494_cov_4.836005	2	p2	(AT)17	34	3514	3547
NODE_21331_length_2749_cov_4.764278	1	p1	(T)10	10	505	514
NODE_21331_length_2749_cov_4.764278	2	p2	(AT)9	18	1472	1489
NODE_21331_length_2749_cov_4.764278	3	p3	(CAG)7	21	2435	2455
NODE_21354_length_3257_cov_5.096715	1	p2	(AC)12	24	632	655
NODE_21359_length_1310_cov_5.296183	1	p2	(TA)8	16	412	427
NODE_21359_length_1310_cov_5.296183	2	p2	(GA)8	16	738	753
NODE_21359_length_1310_cov_5.296183	3	p1	(T)12	12	1127	1138
NODE_21406_length_3741_cov_4.693665	1	p2	(CT)14	28	878	905
NODE_21406_length_3741_cov_4.693665	2	p2	(TC)8	16	1758	1773
NODE_21406_length_3741_cov_4.693665	3	p2	(AG)7	14	3122	3135
NODE_21406_length_3741_cov_4.693665	4	p2	(CT)14	28	3645	3672
NODE_21408_length_1089_cov_4.719926	1	p3	(TTC)5	15	985	999
NODE_21439_length_1619_cov_3.921556	1	p1	(A)10	10	1056	1065
NODE_21439_length_1619_cov_3.921556	2	p1	(A)10	10	1497	1506
NODE_21483_length_1274_cov_5.180534	1	p2	(GA)17	34	1	34
NODE_21523_length_2673_cov_4.762813	1	p1	(T)10	10	2627	2636
NODE_21586_length_975_cov_4.916923	1	p1	(A)14	14	362	375
NODE_21591_length_1163_cov_3.701634	1	p2	(TG)10	20	1004	1023
NODE_21593_length_1361_cov_4.616458	1	c	(TG)9(AG)14	46	236	281
NODE_21620_length_1519_cov_4.348256	1	p1	(A)11	11	663	673
NODE_21708_length_2605_cov_5.532438	1	p2	(TA)6	12	784	795
NODE_21708_length_2605_cov_5.532438	2	p2	(TA)6	12	1631	1642
NODE_21766_length_1443_cov_5.414414	1	p2	(TC)21	42	8	49
NODE_21770_length_2009_cov_5.260328	1	p1	(T)10	10	1996	2005
NODE_21796_length_2515_cov_8.816700	1	p2	(AT)6	12	1455	1466
NODE_21798_length_976_cov_4.205943	1	p2	(GA)7	14	13	26
NODE_21810_length_1238_cov_4.771406	1	p2	(AG)7	14	1020	1033
NODE_21811_length_1058_cov_4.119092	1	p2	(TA)8	16	991	1006
NODE_21896_length_1214_cov_3.934102	1	p1	(T)10	10	1230	1239
NODE_21913_length_3217_cov_4.685421	1	c	(GA)15g(GA)11	53	1	53
NODE_21913_length_3217_cov_4.685421	2	p1	(T)10	10	1018	1027
NODE_21983_length_2217_cov_4.411367	1	p2	(AT)12	24	1126	1149
NODE_21984_length_947_cov_4.761352	1	p1	(T)11	11	552	562
NODE_22143_length_1452_cov_5.404270	1	p1	(T)10	10	900	909
NODE_22159_length_1400_cov_5.029286	1	p1	(A)10	10	1086	1095
NODE_22159_length_1400_cov_5.029286	2	p1	(A)10	10	1272	1281
NODE_22173_length_2034_cov_8.755654	1	c	(A)10ttgttgtatttgaaatttttttaaataaagatatgtatattttagacttttaacctttttcataattgtttttcaaaagtc(T)12	103	1079	1181
NODE_22199_length_1250_cov_6.152800	1	p2	(AT)6	12	453	464
NODE_22234_length_955_cov_4.958115	1	p1	(A)13	13	956	968
NODE_22335_length_1752_cov_4.848174	1	p2	(AT)6	12	1747	1758
NODE_22362_length_2266_cov_5.271845	1	c	(TC)14(TG)6taaaccagggcagcaggctgcctc(CT)6	76	1735	1810
NODE_22362_length_2266_cov_5.271845	2	c	(T)10ccctgattcagaagctc(T)11	38	2139	2176
NODE_22454_length_1449_cov_4.906142	1	p1	(A)15	15	927	941
NODE_22454_length_1449_cov_4.906142	2	p2	(TA)6	12	1048	1059
NODE_22489_length_2950_cov_5.045763	1	p2	(GA)6	12	223	234
NODE_22489_length_2950_cov_5.045763	2	p1	(A)10	10	2375	2384
NODE_22512_length_2760_cov_4.499275	1	p3	(GGT)5	15	251	265
NODE_22512_length_2760_cov_4.499275	2	p2	(CT)6	12	1614	1625
NODE_22513_length_1233_cov_4.669911	1	p2	(AG)6	12	186	197
NODE_22515_length_2262_cov_4.610080	1	p1	(A)14	14	817	830
NODE_22518_length_1514_cov_4.233818	1	c	(GA)7gggagagagaaagaaagaaaaagctgataaaatggaaatatataacaaaatttggggacaagaggtcctttagatacaaaa(AG)8	111	506	616
NODE_22518_length_1514_cov_4.233818	2	p1	(T)10	10	894	903
NODE_22549_length_1411_cov_4.470588	1	p1	(T)13	13	937	949
NODE_22550_length_1112_cov_6.297662	1	p2	(TC)18	36	351	386
NODE_22627_length_1204_cov_3.238372	1	p1	(A)13	13	1	13
NODE_22627_length_1204_cov_3.238372	2	p1	(A)13	13	205	217
NODE_22634_length_2222_cov_5.115662	1	p2	(AT)20	40	2226	2265
NODE_22635_length_2293_cov_4.514174	1	p1	(A)10	10	284	293
NODE_22635_length_2293_cov_4.514174	2	p1	(T)14	14	2334	2347
NODE_22669_length_2614_cov_5.508416	1	p2	(TC)7	14	394	407
NODE_22669_length_2614_cov_5.508416	2	p1	(A)11	11	1500	1510
NODE_22685_length_1224_cov_4.589052	1	p1	(T)10	10	581	590
NODE_22685_length_1224_cov_4.589052	2	p1	(T)10	10	1269	1278
NODE_22763_length_2441_cov_4.687014	1	p2	(AC)15	30	229	258
NODE_22763_length_2441_cov_4.687014	2	p1	(A)15	15	2435	2449
NODE_22792_length_2731_cov_4.868546	1	p2	(GA)7	14	1972	1985
NODE_22799_length_2019_cov_4.777613	1	p2	(TG)10	20	511	530
NODE_22813_length_972_cov_4.902263	1	p1	(T)10	10	274	283
NODE_22842_length_1896_cov_5.590190	1	c	(CA)13(TA)12	50	1	50
NODE_22842_length_1896_cov_5.590190	2	p2	(TC)7	14	349	362
NODE_22936_length_1251_cov_4.734612	1	p1	(T)15	15	225	239
NODE_22975_length_1482_cov_5.974359	1	p2	(TC)9	18	141	158
NODE_22975_length_1482_cov_5.974359	2	p1	(T)10	10	881	890
NODE_22991_length_2106_cov_4.331909	1	p2	(AC)9	18	118	135
NODE_22991_length_2106_cov_4.331909	2	p2	(AG)9	18	1636	1653
NODE_23029_length_4763_cov_17.535168	1	p2	(TA)6	12	181	192
NODE_23029_length_4763_cov_17.535168	2	p1	(T)11	11	4186	4196
NODE_23030_length_2522_cov_5.408803	1	p1	(T)11	11	109	119
NODE_23034_length_1391_cov_4.706686	1	p2	(GA)6	12	912	923
NODE_23082_length_1481_cov_4.482107	1	p2	(TA)8	16	256	271
NODE_23087_length_1175_cov_4.840000	1	p2	(AT)6	12	705	716
NODE_23099_length_1230_cov_4.376423	1	p1	(T)10	10	36	45
NODE_23188_length_951_cov_5.206099	1	p1	(A)11	11	698	708
NODE_23203_length_1464_cov_4.528688	1	p1	(A)10	10	405	414
NODE_23203_length_1464_cov_4.528688	2	p2	(AT)13	26	1059	1084
NODE_23212_length_1089_cov_4.859504	1	p1	(T)11	11	1120	1130
NODE_23224_length_1288_cov_4.037267	1	p2	(CA)6	12	61	72
NODE_23355_length_1436_cov_4.727716	1	p1	(T)10	10	50	59
NODE_23355_length_1436_cov_4.727716	2	p1	(A)13	13	454	466
NODE_23373_length_1211_cov_4.875309	1	p3	(GGT)5	15	238	252
NODE_23381_length_2320_cov_5.380603	1	p1	(A)12	12	9	20
NODE_23389_length_2180_cov_4.923395	1	p1	(T)10	10	2158	2167
NODE_23395_length_3977_cov_4.963289	1	p2	(CT)6	12	833	844
NODE_23397_length_3119_cov_4.781981	1	p2	(TA)8	16	504	519
NODE_23397_length_3119_cov_4.781981	2	p2	(TA)10	20	854	873
NODE_23397_length_3119_cov_4.781981	3	p1	(T)11	11	2570	2580
NODE_23399_length_2253_cov_5.550821	1	p1	(A)10	10	992	1001
NODE_23432_length_1922_cov_5.263268	1	p2	(CT)9	18	102	119
NODE_23432_length_1922_cov_5.263268	2	p2	(TC)6	12	1629	1640
NODE_23433_length_1033_cov_5.352372	1	p3	(AGA)7	21	91	111
NODE_23434_length_1041_cov_5.343900	1	p2	(TC)8	16	420	435
NODE_23434_length_1041_cov_5.343900	2	p2	(TC)12	24	689	712
NODE_23434_length_1041_cov_5.343900	3	p2	(TC)6	12	844	855
NODE_23467_length_2272_cov_4.675616	1	p1	(T)10	10	740	749
NODE_23471_length_1755_cov_4.706553	1	p2	(AC)6	12	837	848
NODE_23528_length_2115_cov_5.043499	1	p2	(AT)6	12	890	901
NODE_23532_length_1958_cov_4.892237	1	p1	(A)11	11	2000	2010
NODE_23538_length_976_cov_4.441598	1	p1	(T)27	27	1004	1030
NODE_23654_length_1023_cov_4.252200	1	p2	(AG)6	12	396	407
NODE_23654_length_1023_cov_4.252200	2	p1	(A)10	10	1024	1033
NODE_23669_length_1612_cov_4.038462	1	p2	(AG)8	16	1524	1539
NODE_23685_length_981_cov_5.110092	1	p2	(GA)25	50	982	1031
NODE_23722_length_1092_cov_5.804945	1	p2	(AG)23	46	691	736
NODE_23725_length_1989_cov_4.004022	1	p1	(T)11	11	341	351
NODE_23725_length_1989_cov_4.004022	2	p2	(TC)8	16	805	820
NODE_23725_length_1989_cov_4.004022	3	p2	(CT)11	22	938	959
NODE_23815_length_1158_cov_4.174438	1	p2	(AG)7	14	981	994
NODE_23817_length_2344_cov_4.699659	1	p2	(AG)6	12	1125	1136
NODE_23855_length_2775_cov_4.408288	1	p1	(A)10	10	1063	1072
NODE_23858_length_2744_cov_4.697886	1	p2	(TA)8	16	1045	1060
NODE_23858_length_2744_cov_4.697886	2	p2	(GA)8	16	1959	1974
NODE_23859_length_4491_cov_4.741928	1	c	(AG)18tattgtcattgcgtaccgacacagagtccgcagcttggacaagcctgtcaacaggaactcccaatgcctgatattggaaacctttgatatcagagaaa(AG)16	166	310	475
NODE_23909_length_2180_cov_5.034404	1	p1	(A)13	13	329	341
NODE_23910_length_1229_cov_4.986167	1	c	(C)11aacccacccactcctttccctactcattgtcggtcacaatcttgataagaatgataaaaagtaaaattgaa(TG)7	96	1183	1278
NODE_23923_length_1195_cov_4.439331	1	p2	(AG)6	12	479	490
NODE_23986_length_1589_cov_4.976715	1	p1	(A)10	10	687	696
NODE_23986_length_1589_cov_4.976715	2	p2	(TC)8	16	1467	1482
NODE_24030_length_3216_cov_4.550373	1	p1	(A)12	12	18	29
NODE_24030_length_3216_cov_4.550373	2	p1	(T)10	10	1883	1892
NODE_24083_length_1640_cov_4.684146	1	p3	(TGG)5	15	252	266
NODE_24087_length_2275_cov_4.285714	1	p2	(CT)7	14	1440	1453
NODE_24107_length_1249_cov_4.369095	1	p2	(AT)9	18	1266	1283
NODE_24241_length_2192_cov_5.235402	1	c	(A)11tgatgattaaaccagagtctgtctttgactttttgcagtcagtccgactacaacaagggagaggg(GA)6	88	1682	1769
NODE_24387_length_1120_cov_4.991071	1	c*	(AAAT)5(AT)6*(TATG)9*	63	643	705
NODE_24394_length_1126_cov_5.261101	1	p2	(AT)6	12	142	153
NODE_24397_length_1016_cov_5.662402	1	p2	(TC)12	24	419	442
NODE_24397_length_1016_cov_5.662402	2	p1	(A)18	18	1028	1045
NODE_24507_length_1438_cov_5.630737	1	p2	(CT)7	14	663	676
NODE_24507_length_1438_cov_5.630737	2	p1	(A)13	13	1460	1472
NODE_24510_length_1089_cov_4.962351	1	p1	(T)10	10	926	935
NODE_24565_length_1779_cov_16.425520	1	p1	(T)10	10	795	804
NODE_24565_length_1779_cov_16.425520	2	p2	(TA)18	36	1798	1833
NODE_24610_length_1165_cov_5.564807	1	p2	(AC)11	22	101	122
NODE_24647_length_1107_cov_4.146341	1	p2	(TA)11	22	271	292
NODE_24647_length_1107_cov_4.146341	2	p2	(TA)6	12	695	706
NODE_24651_length_2524_cov_4.832805	1	c	(TC)9(TA)12	42	1086	1127
NODE_24651_length_2524_cov_4.832805	2	p2	(AG)6	12	2376	2387
NODE_24652_length_2972_cov_4.916218	1	c	(TA)14(GA)11	50	52	101
NODE_24652_length_2972_cov_4.916218	2	p2	(AT)12	24	224	247
NODE_24664_length_4056_cov_5.269970	1	p2	(TA)13	26	503	528
NODE_24670_length_4103_cov_5.292956	1	c	(GAG)6(AAG)5	33	492	524
NODE_24670_length_4103_cov_5.292956	2	p2	(AC)6	12	793	804
NODE_24670_length_4103_cov_5.292956	3	p2	(AG)7	14	2982	2995
NODE_24676_length_1214_cov_4.761120	1	p1	(A)10	10	1234	1243
NODE_24678_length_1245_cov_5.367871	1	p2	(TA)12	24	41	64
NODE_24678_length_1245_cov_5.367871	2	c	(CA)9(TG)6	30	292	321
NODE_24678_length_1245_cov_5.367871	3	c	(GA)6aagaggggag(GA)8	38	688	725
NODE_24686_length_1825_cov_4.473424	1	p1	(T)14	14	466	479
NODE_24807_length_1692_cov_5.802600	1	p2	(TA)10	20	557	576
NODE_24875_length_1274_cov_4.427786	1	p3	(CCT)8	24	229	252
NODE_24888_length_2461_cov_5.157660	1	p2	(AC)8	16	424	439
NODE_24888_length_2461_cov_5.157660	2	c	(AT)7(AC)9attagtcatctggcacacgacaggataggat(TA)7	77	582	658
NODE_24966_length_1602_cov_5.503746	1	p2	(AG)7	14	1305	1318
NODE_24970_length_1481_cov_5.311276	1	p2	(TA)8	16	823	838
NODE_24983_length_3123_cov_5.714697	1	p1	(A)12	12	1059	1070
NODE_25037_length_3213_cov_4.998444	1	p1	(A)10	10	1088	1097
NODE_25039_length_1161_cov_5.318691	1	p1	(T)12	12	1029	1040
NODE_25066_length_968_cov_5.082644	1	p1	(T)11	11	3	13
NODE_25066_length_968_cov_5.082644	2	p2	(TA)11	22	530	551
NODE_25080_length_1411_cov_3.840539	1	p2	(TG)17	34	6	39
NODE_25083_length_1430_cov_5.504895	1	p1	(T)11	11	1011	1021
NODE_25087_length_4906_cov_5.162862	1	p2	(AT)13	26	98	123
NODE_25087_length_4906_cov_5.162862	2	p2	(AC)7	14	4164	4177
NODE_25088_length_1820_cov_4.702198	1	p1	(A)11	11	218	228
NODE_25093_length_3678_cov_4.840674	1	p3	(ATG)7	21	307	327
NODE_25093_length_3678_cov_4.840674	2	p1	(A)10	10	2176	2185
NODE_25093_length_3678_cov_4.840674	3	p1	(A)10	10	3462	3471
NODE_25203_length_1801_cov_5.234314	1	p2	(AG)8	16	1671	1686
NODE_25206_length_3850_cov_4.887792	1	p2	(GA)9	18	2913	2930
NODE_25215_length_1280_cov_4.662500	1	p2	(GA)9	18	933	950
NODE_25279_length_1489_cov_5.302216	1	p1	(T)12	12	122	133
NODE_25295_length_2931_cov_4.569771	1	p2	(AG)20	40	2746	2785
NODE_25308_length_1178_cov_4.454160	1	c*	(TA)8(TAGT)5*	34	1135	1168
NODE_25309_length_1283_cov_4.734996	1	p1	(A)12	12	213	224
NODE_25347_length_2782_cov_4.266715	1	p2	(GA)9	18	2776	2793
NODE_25358_length_1129_cov_4.319752	1	p2	(CT)7	14	692	705
NODE_25366_length_1602_cov_4.016854	1	c	(AT)13c(TA)9	45	1342	1386
NODE_25407_length_1261_cov_4.390167	1	c	(CA)10(TA)16	52	1263	1314
NODE_25421_length_950_cov_3.507368	1	p1	(A)10	10	579	588
NODE_25426_length_1852_cov_4.378510	1	p1	(T)12	12	788	799
NODE_25437_length_1309_cov_3.919022	1	p2	(TA)9	18	502	519
NODE_25463_length_4504_cov_6.022425	1	p1	(A)14	14	1	14
NODE_25463_length_4504_cov_6.022425	2	p1	(A)11	11	1126	1136
NODE_25466_length_2299_cov_4.267942	1	p2	(TA)6	12	1709	1720
NODE_25466_length_2299_cov_4.267942	2	p2	(TC)6	12	2000	2011
NODE_25466_length_2299_cov_4.267942	3	p2	(CT)9	18	2135	2152
NODE_25478_length_1090_cov_4.037615	1	p3	(CTT)16	48	282	329
NODE_25575_length_3754_cov_4.882525	1	p1	(A)16	16	15	30
NODE_25575_length_3754_cov_4.882525	2	p2	(AT)10	20	707	726
NODE_25576_length_1354_cov_5.505170	1	p2	(GA)7	14	1294	1307
NODE_25581_length_2011_cov_5.391347	1	p1	(T)13	13	2	14
NODE_25626_length_1707_cov_4.899824	1	p2	(AT)11	22	774	795
NODE_25673_length_2662_cov_5.142750	1	p2	(AT)20	40	15	54
NODE_25673_length_2662_cov_5.142750	2	p2	(CT)7	14	497	510
NODE_25680_length_1782_cov_4.819865	1	p2	(TA)8	16	1336	1351
NODE_25693_length_1206_cov_4.628524	1	p2	(TG)7	14	423	436
NODE_25694_length_1280_cov_3.678125	1	c	(AC)9(AT)6	30	781	810
NODE_25694_length_1280_cov_3.678125	2	p2	(AT)21	42	990	1031
NODE_25780_length_1894_cov_5.168954	1	p1	(T)15	15	982	996
NODE_25793_length_1050_cov_4.501905	1	p2	(TA)7	14	894	907
NODE_25887_length_1732_cov_4.792725	1	p1	(T)10	10	1743	1752
NODE_25891_length_1709_cov_4.631363	1	p2	(TC)18	36	350	385
NODE_25891_length_1709_cov_4.631363	2	c	(AG)6catggtacagaaatcaatatgagtaggcctgcac(AG)7	60	688	747
NODE_25891_length_1709_cov_4.631363	3	p2	(CA)6	12	867	878
NODE_25933_length_1452_cov_4.910468	1	p1	(T)10	10	880	889
NODE_25933_length_1452_cov_4.910468	2	p2	(AG)6	12	1379	1390
NODE_25982_length_1598_cov_3.644556	1	p1	(T)10	10	873	882
NODE_26054_length_1742_cov_5.260046	1	p2	(TG)10	20	199	218
NODE_26178_length_1964_cov_4.943992	1	p2	(TC)23	46	355	400
NODE_26211_length_2276_cov_5.114235	1	p1	(T)11	11	1010	1020
NODE_26213_length_1126_cov_3.529307	1	p1	(A)13	13	1158	1170
NODE_26264_length_1278_cov_4.956964	1	p2	(AT)9	18	263	280
NODE_26264_length_1278_cov_4.956964	2	p1	(T)15	15	1316	1330
NODE_26292_length_2170_cov_4.582949	1	c	(CT)19ccctcgag(AT)6	58	9	66
NODE_26319_length_1369_cov_4.589481	1	p1	(G)10	10	286	295
NODE_26349_length_2150_cov_4.990698	1	p3	(TCC)5	15	1813	1827
NODE_26349_length_2150_cov_4.990698	2	p1	(T)18	18	2187	2204
NODE_26354_length_1717_cov_4.578334	1	p2	(GA)8	16	315	330
NODE_26354_length_1717_cov_4.578334	2	c	(AG)10g(GA)10	41	890	930
NODE_26354_length_1717_cov_4.578334	3	p1	(A)10	10	1748	1757
NODE_26442_length_2239_cov_5.399732	1	p2	(CT)12	24	1072	1095
NODE_26469_length_1070_cov_4.754206	1	p1	(A)10	10	25	34
NODE_26469_length_1070_cov_4.754206	2	c	(CT)14aat(AC)7	45	439	483
NODE_26527_length_1158_cov_4.667530	1	p1	(A)10	10	721	730
NODE_26532_length_8592_cov_17.061918	1	p1	(A)10	10	5601	5610
NODE_26532_length_8592_cov_17.061918	2	p1	(A)11	11	7751	7761
NODE_26532_length_8592_cov_17.061918	3	p2	(AT)8	16	8630	8645
NODE_26566_length_1672_cov_4.078948	1	p2	(CT)14	28	650	677
NODE_26652_length_1532_cov_4.678198	1	p2	(GA)6	12	1018	1029
NODE_26652_length_1532_cov_4.678198	2	p1	(A)10	10	1452	1461
NODE_26662_length_1542_cov_5.332036	1	p2	(GT)7	14	1	14
NODE_26672_length_1067_cov_3.774133	1	p1	(T)13	13	348	360
NODE_26672_length_1067_cov_3.774133	2	c	(TC)7ggagatggctgccgagatctcccgcatcctacaccagagcttctccgtcccattctccgatgtaaatttccgcgggaagg(TC)7	108	622	729
NODE_26685_length_1554_cov_4.803732	1	p2	(AG)19	38	60	97
NODE_26688_length_2543_cov_4.403461	1	p2	(AT)6	12	2558	2569
NODE_26691_length_2207_cov_4.925691	1	p2	(CA)6	12	922	933
NODE_26691_length_2207_cov_4.925691	2	p1	(A)10	10	1942	1951
NODE_26729_length_978_cov_4.471370	1	p2	(AT)9	18	806	823
NODE_26803_length_1971_cov_5.053272	1	p1	(T)12	12	1267	1278
NODE_26803_length_1971_cov_5.053272	2	p1	(A)10	10	1970	1979
NODE_26849_length_2715_cov_4.232412	1	p1	(T)11	11	138	148
NODE_26849_length_2715_cov_4.232412	2	p1	(T)10	10	479	488
NODE_26849_length_2715_cov_4.232412	3	p2	(TA)8	16	2693	2708
NODE_26862_length_2844_cov_4.975387	1	p1	(A)10	10	231	240
NODE_26862_length_2844_cov_4.975387	2	p1	(A)10	10	2702	2711
NODE_26888_length_3011_cov_5.340086	1	p1	(T)10	10	23	32
NODE_26888_length_3011_cov_5.340086	2	p1	(A)10	10	1587	1596
NODE_26891_length_1368_cov_5.372807	1	p1	(T)11	11	307	317
NODE_26891_length_1368_cov_5.372807	2	p2	(AG)11	22	1125	1146
NODE_26933_length_1179_cov_8.530958	1	p2	(GA)8	16	1026	1041
NODE_26966_length_1220_cov_4.436066	1	p1	(A)10	10	4	13
NODE_26997_length_1601_cov_4.650218	1	p1	(T)10	10	1285	1294
NODE_27011_length_1473_cov_4.237610	1	p1	(T)17	17	1505	1521
NODE_27062_length_994_cov_5.297787	1	p2	(TA)9	18	214	231
NODE_27065_length_1146_cov_5.192845	1	p2	(TA)8	16	508	523
NODE_27065_length_1146_cov_5.192845	2	p1	(T)18	18	1183	1200
NODE_27067_length_981_cov_4.991845	1	p1	(T)12	12	26	37
NODE_27067_length_981_cov_4.991845	2	p1	(T)10	10	533	542
NODE_27192_length_2817_cov_4.832091	1	p2	(TG)7	14	301	314
NODE_27224_length_1557_cov_4.429672	1	p2	(AG)6	12	494	505
NODE_27229_length_1035_cov_3.791304	1	p1	(A)10	10	256	265
NODE_27264_length_1253_cov_5.005587	1	p2	(CA)7	14	286	299
NODE_27264_length_1253_cov_5.005587	2	p1	(C)52	52	1256	1307
NODE_27284_length_1072_cov_5.333955	1	c*	(TA)11(AATA)6*(AAT)6*	59	8	66
NODE_27284_length_1072_cov_5.333955	2	p1	(T)10	10	558	567
NODE_27285_length_1827_cov_5.144499	1	p2	(AG)9	18	1832	1849
NODE_27287_length_2122_cov_5.098492	1	p2	(AG)6	12	1956	1967
NODE_27290_length_1733_cov_4.376803	1	c	(TG)6(AG)12tgagagt(GA)7	57	1333	1389
NODE_27300_length_1523_cov_4.845043	1	p1	(T)10	10	5	14
NODE_27300_length_1523_cov_4.845043	2	p1	(T)10	10	229	238
NODE_27301_length_1271_cov_4.863100	1	p2	(TA)9	18	1045	1062
NODE_27326_length_1082_cov_4.021257	1	p1	(A)10	10	57	66
NODE_27326_length_1082_cov_4.021257	2	c	(T)10c(A)12	23	1076	1098
NODE_27329_length_1111_cov_5.103510	1	p1	(A)10	10	699	708
NODE_27337_length_1189_cov_4.904962	1	p2	(TA)6	12	962	973
NODE_27342_length_1454_cov_5.540578	1	p1	(A)10	10	1079	1088
NODE_27351_length_1957_cov_5.094021	1	c	(CT)7cgttggacgcctcccttcccttttctttctctcttccgtattctgttttggaaatcgatgtggttgtgaaagatcttgtctttgtcttcttgttgttc(GTG)6	130	1371	1500
NODE_27351_length_1957_cov_5.094021	2	p2	(TC)8	16	1628	1643
NODE_27352_length_1018_cov_6.370334	1	p1	(T)11	11	298	308
NODE_27366_length_1931_cov_5.181253	1	p2	(AT)6	12	981	992
NODE_27371_length_1116_cov_4.001792	1	p1	(A)12	12	3	14
NODE_27374_length_1377_cov_4.891068	1	p2	(AT)8	16	1070	1085
NODE_27381_length_1813_cov_4.660232	1	p1	(A)10	10	647	656
NODE_27399_length_1208_cov_4.125000	1	c	(TG)10ggtgtgcatatgtgta(TG)12aa(AG)6	74	519	592
NODE_27421_length_1260_cov_6.363492	1	p2	(AG)8	16	1212	1227
NODE_27434_length_1399_cov_4.851322	1	p1	(T)10	10	299	308
NODE_27443_length_971_cov_3.671473	1	c	(CT)6tctctgtaactaagggacttcttgtcttcaaattttgatatagattctcattttatcagctttctctctt(TC)10	102	533	634
NODE_27481_length_1078_cov_4.826530	1	p1	(A)10	10	846	855
NODE_27497_length_1440_cov_4.270833	1	p1	(T)11	11	1453	1463
NODE_27527_length_1795_cov_4.851254	1	p1	(T)10	10	1381	1390
NODE_27527_length_1795_cov_4.851254	2	p1	(T)12	12	1613	1624
NODE_27659_length_962_cov_5.169439	1	p1	(A)10	10	904	913
NODE_27727_length_1026_cov_4.324562	1	p1	(A)10	10	1058	1067
NODE_27750_length_1758_cov_4.352105	1	p3	(TAA)5	15	1090	1104
NODE_27752_length_2018_cov_4.654113	1	p2	(AG)10	20	900	919
NODE_27760_length_1406_cov_4.514936	1	p2	(CT)18	36	151	186
NODE_27762_length_2090_cov_5.175598	1	p1	(T)10	10	2020	2029
NODE_27763_length_3176_cov_4.663413	1	p2	(TA)7	14	2091	2104
NODE_27779_length_2322_cov_4.178295	1	p2	(TA)9	18	2359	2376
NODE_27806_length_1051_cov_3.871551	1	p1	(T)10	10	1092	1101
NODE_27847_length_1600_cov_4.451250	1	p2	(AT)12	24	696	719
NODE_27847_length_1600_cov_4.451250	2	p2	(AT)6	12	1629	1640
NODE_27854_length_2457_cov_4.311355	1	p2	(GA)6	12	554	565
NODE_27875_length_1432_cov_4.585894	1	p1	(T)12	12	1104	1115
NODE_27875_length_1432_cov_4.585894	2	p2	(AT)6	12	1264	1275
NODE_27875_length_1432_cov_4.585894	3	p2	(AT)21	42	1438	1479
NODE_28006_length_2187_cov_4.517604	1	p1	(A)12	12	80	91
NODE_28037_length_1993_cov_5.381836	1	c	(TG)9(AG)10	38	868	905
NODE_28037_length_1993_cov_5.381836	2	p2	(AC)7	14	1636	1649
NODE_28149_length_1648_cov_5.063107	1	p2	(AT)7	14	1131	1144
NODE_28199_length_1187_cov_5.851727	1	p2	(TC)8	16	512	527
NODE_28224_length_1421_cov_4.457424	1	p2	(TA)23	46	1	46
NODE_28224_length_1421_cov_4.457424	2	p2	(AG)9	18	817	834
NODE_28226_length_5702_cov_5.032620	1	p2	(TG)6	12	98	109
NODE_28226_length_5702_cov_5.032620	2	p2	(TA)9	18	2116	2133
NODE_28253_length_1490_cov_12.435571	1	p1	(T)11	11	28	38
NODE_28262_length_1232_cov_4.919643	1	p2	(TA)7	14	1219	1232
NODE_28269_length_1678_cov_5.266388	1	p2	(TC)8	16	670	685
NODE_28376_length_1509_cov_5.106693	1	p2	(AC)7	14	635	648
NODE_28377_length_1087_cov_4.333027	1	p2	(GA)6	12	214	225
NODE_28382_length_1143_cov_4.608924	1	p1	(A)11	11	143	153
NODE_28386_length_3839_cov_4.922376	1	p1	(T)10	10	1595	1604
NODE_28386_length_3839_cov_4.922376	2	p1	(T)11	11	2636	2646
NODE_28386_length_3839_cov_4.922376	3	p1	(T)10	10	2751	2760
NODE_28409_length_2203_cov_4.781662	1	p1	(T)10	10	446	455
NODE_28409_length_2203_cov_4.781662	2	c	(TG)7cgtgtgtgaaaatttataaaagaaacttaaatcaaagaaggagagagaaatattttagaaatatatata(TG)10	103	909	1011
NODE_28532_length_1152_cov_5.159722	1	p1	(T)11	11	1153	1163
NODE_28609_length_1660_cov_5.388554	1	p1	(A)11	11	157	167
NODE_28610_length_1141_cov_3.204207	1	p1	(A)15	15	686	700
NODE_28702_length_1043_cov_5.112176	1	p2	(AG)9	18	522	539
NODE_28787_length_1241_cov_4.975826	1	p1	(T)10	10	250	259
NODE_28787_length_1241_cov_4.975826	2	p1	(T)11	11	1057	1067
NODE_28823_length_1158_cov_5.593264	1	p1	(A)11	11	1191	1201
NODE_28827_length_1673_cov_5.052600	1	p1	(A)10	10	645	654
NODE_28827_length_1673_cov_5.052600	2	p2	(GA)7	14	1399	1412
NODE_28828_length_2503_cov_5.003596	1	p1	(T)13	13	2373	2385
NODE_28829_length_2961_cov_5.287065	1	p1	(T)15	15	15	29
NODE_28853_length_1974_cov_9.150455	1	p1	(T)12	12	1962	1973
NODE_28854_length_1271_cov_4.742722	1	c	(ATAA)5ttgtaaaaaatctatctaaaaatatataaaaataaataaaaattttgttgctgccaacgactgc(A)13	97	1192	1288
NODE_28866_length_1539_cov_5.092268	1	p1	(T)10	10	1545	1554
NODE_28869_length_1290_cov_4.644186	1	c	(A)11ttatttgttgatgaaaaacaaaataaaaatcttgttctaatcccccaccat(TC)6	74	842	915
NODE_28869_length_1290_cov_4.644186	2	p1	(T)10	10	1307	1316
NODE_28960_length_1215_cov_5.595885	1	p1	(T)11	11	1085	1095
NODE_28998_length_1220_cov_4.448360	1	p1	(A)14	14	1	14
NODE_29003_length_1700_cov_5.270588	1	p2	(TC)13	26	1294	1319
NODE_29008_length_1293_cov_3.679814	1	p1	(A)10	10	513	522
NODE_29037_length_1065_cov_5.721127	1	c	(TC)12acacacacacaaagacaa(AC)9	60	323	382
NODE_29041_length_1800_cov_4.552222	1	p1	(T)11	11	13	23
NODE_29050_length_1335_cov_4.799251	1	p2	(GA)7	14	1242	1255
NODE_29129_length_2408_cov_4.708472	1	p2	(AG)9	18	19	36
NODE_29129_length_2408_cov_4.708472	2	p1	(A)12	12	2433	2444
NODE_29131_length_1088_cov_5.251838	1	p1	(A)12	12	720	731
NODE_29138_length_1658_cov_9.372135	1	p2	(AG)9	18	1208	1225
NODE_29138_length_1658_cov_9.372135	2	p1	(A)11	11	1582	1592
NODE_29145_length_1871_cov_5.188669	1	p1	(T)13	13	8	20
NODE_29227_length_1522_cov_4.819317	1	p1	(A)12	12	159	170
NODE_29238_length_3241_cov_4.825671	1	p2	(AT)13	26	273	298
NODE_29238_length_3241_cov_4.825671	2	c	(TA)9ataggttagggatgaaatcggactctttaatatgatatttaatgag(T)13	77	2085	2161
NODE_29238_length_3241_cov_4.825671	3	p2	(TC)6	12	2483	2494
NODE_29239_length_1845_cov_5.150136	1	p2	(AG)6	12	781	792
NODE_29240_length_2502_cov_4.394884	1	p2	(AT)10	20	185	204
NODE_29240_length_2502_cov_4.394884	2	c	(TA)7tttattgtgtgattaaaaattattaaaaaatgttcattagcaacaacagatgtgtggccagtttttagtgacgaaatatact(TA)6t(TA)14	137	417	553
NODE_29240_length_2502_cov_4.394884	3	p2	(AT)6	12	662	673
NODE_29356_length_998_cov_5.017034	1	p2	(CT)9	18	930	947
NODE_29357_length_1836_cov_6.220588	1	p1	(T)10	10	1581	1590
NODE_29357_length_1836_cov_6.220588	2	p1	(T)10	10	1761	1770
NODE_29360_length_1787_cov_4.867375	1	p3	(TAA)5	15	1813	1827
NODE_29395_length_1117_cov_5.176365	1	p2	(CT)11	22	364	385
NODE_29460_length_1687_cov_4.130409	1	c	(TG)6cctgtgtgacatggcatataaaatataaacaagaagtcatacaggtaactattcgctcaggtagatt(A)14	93	994	1086
NODE_29514_length_1901_cov_5.027880	1	p1	(T)12	12	119	130
NODE_29515_length_1044_cov_4.607280	1	p2	(TA)12	24	20	43
NODE_29521_length_1140_cov_5.855263	1	p1	(T)11	11	123	133
NODE_29603_length_1394_cov_4.497130	1	p1	(A)10	10	212	221
NODE_29603_length_1394_cov_4.497130	2	p1	(T)10	10	466	475
NODE_29603_length_1394_cov_4.497130	3	p2	(TA)12	24	677	700
NODE_29603_length_1394_cov_4.497130	4	p1	(T)13	13	841	853
NODE_29609_length_1453_cov_4.302822	1	p2	(TC)14	28	293	320
NODE_29635_length_1576_cov_5.092639	1	c	(TA)7acccaatctaaccctctagcccttctaacctgctttttatgttcatcatttccctt(TC)6	82	300	381
NODE_29638_length_1298_cov_4.630200	1	p1	(T)10	10	254	263
NODE_29638_length_1298_cov_4.630200	2	p1	(T)10	10	1154	1163
NODE_29639_length_1000_cov_4.006000	1	p1	(T)10	10	889	898
NODE_29681_length_1634_cov_5.023868	1	p1	(A)10	10	721	730
NODE_29681_length_1634_cov_5.023868	2	p2	(AG)8	16	1106	1121
NODE_29683_length_4090_cov_4.983619	1	p1	(T)10	10	723	732
NODE_29713_length_1044_cov_4.575671	1	p2	(TA)8	16	230	245
NODE_29713_length_1044_cov_4.575671	2	p3	(AAG)5	15	998	1012
NODE_29742_length_1279_cov_4.673182	1	p2	(TC)7	14	153	166
NODE_29751_length_1762_cov_4.682747	1	p2	(AT)9	18	211	228
NODE_29751_length_1762_cov_4.682747	2	p1	(T)12	12	1479	1490
NODE_29766_length_952_cov_5.370798	1	p2	(TA)7	14	937	950
NODE_29935_length_2799_cov_5.747410	1	p2	(AG)7	14	1628	1641
NODE_29994_length_1688_cov_4.699645	1	p1	(A)10	10	419	428
NODE_30010_length_1680_cov_4.698810	1	p1	(A)11	11	38	48
NODE_30060_length_3178_cov_4.259912	1	p1	(A)13	13	385	397
NODE_30060_length_3178_cov_4.259912	2	c	(T)10ccttctcctc(CT)8	36	633	668
NODE_30111_length_1208_cov_5.567053	1	p2	(AT)9	18	96	113
NODE_30111_length_1208_cov_5.567053	2	p2	(AG)9	18	451	468
NODE_30111_length_1208_cov_5.567053	3	c	(TA)18(GA)8	52	1211	1262
NODE_30118_length_1231_cov_5.092607	1	p2	(TA)10	20	1	20
NODE_30121_length_2741_cov_5.445823	1	p1	(A)10	10	28	37
NODE_30139_length_1062_cov_4.510358	1	p2	(GA)6	12	901	912
NODE_30154_length_1355_cov_4.856089	1	p2	(AG)6	12	875	886
NODE_30164_length_1532_cov_4.260444	1	p2	(AT)17	34	108	141
NODE_30164_length_1532_cov_4.260444	2	p1	(A)10	10	500	509
NODE_30164_length_1532_cov_4.260444	3	p2	(AT)6	12	1148	1159
NODE_30170_length_1007_cov_4.802383	1	p2	(TA)17	34	729	762
NODE_30171_length_2149_cov_5.194044	1	p1	(T)12	12	770	781
NODE_30171_length_2149_cov_5.194044	2	p2	(TC)16	32	1970	2001
NODE_30296_length_3662_cov_4.545877	1	p1	(T)12	12	379	390
NODE_30296_length_3662_cov_4.545877	2	c	(CT)8ccacc(ATA)7(ATT)5	57	2247	2303
NODE_30296_length_3662_cov_4.545877	3	p1	(T)12	12	3219	3230
NODE_30443_length_1316_cov_4.931611	1	p2	(TG)9	18	1200	1217
NODE_30443_length_1316_cov_4.931611	2	p1	(A)13	13	1323	1335
NODE_30449_length_967_cov_4.631851	1	p2	(AT)19	38	695	732
NODE_30454_length_1551_cov_3.613798	1	p1	(A)10	10	724	733
NODE_30454_length_1551_cov_3.613798	2	p2	(AT)14	28	1472	1499
NODE_30556_length_1026_cov_4.161793	1	p2	(GA)6	12	846	857
NODE_30561_length_1872_cov_5.199252	1	p1	(T)12	12	1063	1074
NODE_30561_length_1872_cov_5.199252	2	p2	(TC)8	16	1270	1285
NODE_30564_length_1194_cov_4.778894	1	p2	(TC)6	12	707	718
NODE_30564_length_1194_cov_4.778894	2	p2	(TA)8	16	1055	1070
NODE_30618_length_1497_cov_4.475618	1	c	(TA)6a(AG)8	29	1	29
NODE_30629_length_1665_cov_4.350751	1	p1	(A)11	11	78	88
NODE_30637_length_1483_cov_4.573837	1	c	(T)10(A)10	20	16	35
NODE_30637_length_1483_cov_4.573837	2	p2	(AG)15	30	160	189
NODE_30637_length_1483_cov_4.573837	3	p2	(TC)10	20	1220	1239
NODE_30676_length_949_cov_4.473130	1	c	(AC)7(AT)16	46	246	291
NODE_30676_length_949_cov_4.473130	2	p1	(T)10	10	499	508
NODE_30723_length_1023_cov_8.172043	1	p2	(AT)11	22	154	175
NODE_30726_length_1676_cov_5.440931	1	p2	(GA)24	48	1	48
NODE_30726_length_1676_cov_5.440931	2	p1	(A)10	10	760	769
NODE_30751_length_1580_cov_4.675316	1	p1	(T)12	12	824	835
NODE_30779_length_1896_cov_5.210970	1	c	(AT)10agaa(AG)9atggattgatagaatgtttttttgggtcttatgttaaatggttttagctaaaaccataatctttttactctaccattta(CT)6	133	836	968
NODE_30779_length_1896_cov_5.210970	2	p1	(A)11	11	1092	1102
NODE_30788_length_1460_cov_4.633562	1	p2	(AG)8	16	657	672
NODE_30788_length_1460_cov_4.633562	2	p1	(A)10	10	831	840
NODE_30840_length_975_cov_4.528205	1	p1	(T)11	11	420	430
NODE_30844_length_3037_cov_4.724729	1	p1	(A)10	10	21	30
NODE_30844_length_3037_cov_4.724729	2	p1	(T)10	10	1284	1293
NODE_30844_length_3037_cov_4.724729	3	p1	(T)10	10	2187	2196
NODE_30852_length_2124_cov_5.239642	1	p1	(T)10	10	397	406
NODE_30943_length_1195_cov_5.007531	1	p2	(GT)11	22	757	778
NODE_30958_length_1868_cov_5.192184	1	p2	(GA)14	28	65	92
NODE_30958_length_1868_cov_5.192184	2	p1	(A)10	10	567	576
NODE_30959_length_1187_cov_4.875316	1	p2	(GA)6	12	504	515
NODE_30972_length_1827_cov_4.645320	1	p2	(AG)6	12	20	31
NODE_31057_length_2308_cov_4.765165	1	c	(AT)6(GT)7gatttattatgtactg(TA)20	82	129	210
NODE_31058_length_2021_cov_4.413162	1	p1	(T)10	10	2060	2069
NODE_31064_length_1550_cov_5.289678	1	p2	(AT)18	36	1120	1155
NODE_31101_length_983_cov_4.427263	1	p1	(T)10	10	173	182
NODE_31118_length_1122_cov_6.112299	1	p1	(T)10	10	1106	1115
NODE_31160_length_2373_cov_4.674252	1	c	(TA)6tgtgtgtatgtaaagccgagatcctccacatttgagtgccat(TA)18	90	1239	1328
NODE_31160_length_2373_cov_4.674252	2	p2	(GA)6	12	1544	1555
NODE_31160_length_2373_cov_4.674252	3	p2	(GA)6	12	1963	1974
NODE_31162_length_969_cov_4.411765	1	p1	(T)10	10	754	763
NODE_31163_length_1556_cov_8.384318	1	p1	(A)10	10	1579	1588
NODE_31170_length_2736_cov_5.403143	1	p1	(T)13	13	19	31
NODE_31183_length_1405_cov_5.289680	1	p2	(AG)8	16	129	144
NODE_31183_length_1405_cov_5.289680	2	p1	(T)11	11	832	842
NODE_31217_length_1380_cov_5.463044	1	p2	(AT)7	14	580	593
NODE_31218_length_1094_cov_5.260512	1	p2	(TA)8	16	1132	1147
NODE_31253_length_2079_cov_5.297740	1	p2	(TC)9	18	89	106
NODE_31253_length_2079_cov_5.297740	2	c	(TA)6(CA)6ata(AG)9	45	379	423
NODE_31256_length_1503_cov_4.635396	1	c	(TA)6catacatacatacatatatacatgtac(AT)8actgatttttaccaact(TA)6	84	55	138
NODE_31256_length_1503_cov_4.635396	2	p2	(AT)9	18	1262	1279
NODE_31270_length_2189_cov_4.758794	1	p1	(T)10	10	4	13
NODE_31289_length_2536_cov_4.059937	1	p2	(TA)6	12	684	695
NODE_31289_length_2536_cov_4.059937	2	p2	(AG)15	30	900	929
NODE_31296_length_2307_cov_5.736454	1	p2	(GA)16	32	2156	2187
NODE_31301_length_1057_cov_4.031220	1	p2	(TG)13	26	793	818
NODE_31327_length_4515_cov_4.899889	1	p1	(A)10	10	4453	4462
NODE_31432_length_1098_cov_5.105647	1	p1	(A)10	10	164	173
NODE_31432_length_1098_cov_5.105647	2	p2	(AT)6	12	303	314
NODE_31432_length_1098_cov_5.105647	3	p2	(TC)15	30	769	798
NODE_31454_length_991_cov_5.552977	1	p2	(CA)6	12	243	254
NODE_31498_length_2809_cov_4.766109	1	c	(TA)19tcatagtcacaaaaaacgtgaaaaaaacgcgataaattaaattgccgtttaaagt(A)10	103	999	1101
NODE_31550_length_1485_cov_4.573737	1	p1	(A)19	19	1	19
NODE_31611_length_3141_cov_5.730022	1	p1	(A)10	10	2545	2554
NODE_31611_length_3141_cov_5.730022	2	p1	(T)10	10	2866	2875
NODE_31611_length_3141_cov_5.730022	3	p2	(TA)9	18	3178	3195
NODE_31682_length_1139_cov_4.548727	1	p2	(GT)25	50	1	50
NODE_31689_length_1185_cov_4.398312	1	p2	(GA)9	18	454	471
NODE_31700_length_2934_cov_4.924335	1	p1	(T)13	13	21	33
NODE_31732_length_1005_cov_3.133333	1	p2	(TA)9	18	496	513
NODE_31732_length_1005_cov_3.133333	2	p1	(T)13	13	894	906
NODE_31847_length_2579_cov_4.815433	1	p1	(A)10	10	1860	1869
NODE_31896_length_1039_cov_4.870068	1	p1	(T)12	12	24	35
NODE_31984_length_2747_cov_4.549326	1	p2	(TC)9	18	1761	1778
NODE_31984_length_2747_cov_4.549326	2	c	(A)10taaaaatctacttgttaatgtat(A)10	43	1905	1947
NODE_32039_length_1376_cov_4.539971	1	p2	(GA)7	14	533	546
NODE_32039_length_1376_cov_4.539971	2	p2	(AT)11	22	1047	1068
NODE_32076_length_1247_cov_9.820369	1	p2	(AT)24	48	1	48
NODE_32077_length_1526_cov_4.549148	1	p1	(T)10	10	1431	1440
NODE_32113_length_1031_cov_5.662464	1	c	(AC)8(AT)8	32	529	560
NODE_32123_length_1074_cov_4.365922	1	p2	(CT)7	14	215	228
NODE_32133_length_1606_cov_3.433375	1	p2	(AG)11	22	777	798
NODE_32140_length_1435_cov_4.920557	1	p2	(CT)7	14	1184	1197
NODE_32155_length_1185_cov_4.917300	1	p1	(T)11	11	794	804
NODE_32157_length_1360_cov_5.302941	1	p1	(T)14	14	18	31
NODE_32157_length_1360_cov_5.302941	2	p2	(TA)6	12	291	302
NODE_32157_length_1360_cov_5.302941	3	p2	(CT)8	16	681	696
NODE_32158_length_3621_cov_5.011047	1	p2	(CA)8	16	1667	1682
NODE_32164_length_1325_cov_5.338868	1	p1	(A)21	21	1	21
NODE_32188_length_1334_cov_5.727137	1	p2	(TG)6	12	260	271
NODE_32234_length_1183_cov_4.644125	1	p1	(A)10	10	36	45
NODE_32356_length_3027_cov_5.483647	1	c*	(A)10(AT)22*	53	3028	3080
NODE_32364_length_2576_cov_5.056289	1	p2	(TC)17	34	2032	2065
NODE_32417_length_960_cov_3.460417	1	c	(TA)6(TG)9	30	8	37
NODE_32417_length_960_cov_3.460417	2	p1	(A)14	14	1001	1014
NODE_32448_length_1106_cov_4.780289	1	c	(AAG)5aggaggatgcttaattaaagtttgttttgtaaaaaaaaac(A)12	67	571	637
NODE_32449_length_1353_cov_3.822616	1	p1	(A)10	10	1197	1206
NODE_32638_length_1207_cov_5.000828	1	p1	(T)12	12	12	23
NODE_32646_length_1440_cov_5.106250	1	p1	(T)10	10	258	267
NODE_32711_length_1113_cov_4.070979	1	p2	(GA)6	12	932	943
NODE_32712_length_2082_cov_4.620557	1	p1	(T)11	11	1511	1521
NODE_32731_length_1326_cov_4.815234	1	p2	(TG)6	12	619	630
NODE_32732_length_1624_cov_5.674261	1	p1	(T)12	12	790	801
NODE_32732_length_1624_cov_5.674261	2	c	(AC)6atacaaaaccatgcgataaaatccattccttatatatgaggtacacgcgtgcatgcacacgca(AC)6	87	1266	1352
NODE_32732_length_1624_cov_5.674261	3	p2	(TA)14	28	1650	1677
NODE_32778_length_1444_cov_4.909280	1	p2	(AT)10	20	1301	1320
NODE_32798_length_2503_cov_4.600480	1	p1	(A)12	12	883	894
NODE_32799_length_1661_cov_3.785671	1	p2	(TA)11	22	1	22
NODE_32799_length_1661_cov_3.785671	2	c	(CT)8(GT)15	46	1366	1411
NODE_32835_length_1647_cov_4.634487	1	p1	(A)17	17	5	21
NODE_32871_length_2067_cov_5.432027	1	p1	(A)12	12	1393	1404
NODE_32871_length_2067_cov_5.432027	2	p2	(TA)10	20	1922	1941
NODE_32874_length_991_cov_3.983855	1	p1	(A)10	10	683	692
NODE_32908_length_1261_cov_5.184774	1	c	(CT)8(CA)7	30	783	812
NODE_32919_length_1346_cov_4.161219	1	p2	(AG)6	12	873	884
NODE_32919_length_1346_cov_4.161219	2	p1	(G)12	12	1008	1019
NODE_32942_length_1582_cov_4.373578	1	p1	(A)10	10	399	408
NODE_32942_length_1582_cov_4.373578	2	p1	(A)10	10	1377	1386
NODE_32943_length_6341_cov_5.235294	1	p2	(TA)9	18	5542	5559
NODE_32943_length_6341_cov_5.235294	2	p2	(TA)10	20	5979	5998
NODE_32944_length_2153_cov_8.880167	1	p1	(A)14	14	17	30
NODE_32956_length_2839_cov_4.714336	1	p1	(A)11	11	498	508
NODE_32956_length_2839_cov_4.714336	2	p1	(T)10	10	1347	1356
NODE_32965_length_1369_cov_4.620891	1	p2	(AT)10	20	1378	1397
NODE_33020_length_1898_cov_4.363541	1	p2	(AC)6	12	273	284
NODE_33020_length_1898_cov_4.363541	2	p2	(TA)22	44	1348	1391
NODE_33020_length_1898_cov_4.363541	3	p2	(TG)10	20	1831	1850
NODE_33027_length_1383_cov_4.733912	1	c	(AG)6tctggaggttagctggaagcacgcgatccctcaagtgttttgacagtgtgagag(GAA)5	81	134	214
NODE_33027_length_1383_cov_4.733912	2	p2	(CT)24	48	1389	1436
NODE_33125_length_1070_cov_5.235514	1	p2	(TA)10	20	1103	1122
NODE_33140_length_2304_cov_5.059028	1	p1	(A)10	10	1698	1707
NODE_33167_length_1259_cov_3.830818	1	p2	(AG)14	28	279	306
NODE_33167_length_1259_cov_3.830818	2	p2	(CT)10	20	543	562
NODE_33168_length_1148_cov_5.445122	1	p2	(GA)8	16	194	209
NODE_33168_length_1148_cov_5.445122	2	c	(AT)17(AG)9	52	1151	1202
NODE_33211_length_1247_cov_4.206897	1	p6	(GCGACG)5	30	914	943
NODE_33225_length_1280_cov_4.136719	1	p1	(A)11	11	296	306
NODE_33287_length_988_cov_5.510121	1	p1	(A)15	15	1	15
NODE_33288_length_1450_cov_5.410345	1	c	(AG)8g(GA)15	47	625	671
NODE_33300_length_2045_cov_5.062592	1	p2	(GA)17	34	1792	1825
NODE_33329_length_954_cov_4.200210	1	p2	(AT)8	16	755	770
NODE_33346_length_2021_cov_4.605146	1	p1	(T)10	10	699	708
NODE_33349_length_1650_cov_5.139394	1	p1	(A)10	10	1612	1621
NODE_33357_length_1048_cov_4.508588	1	p2	(AC)9	18	159	176
NODE_33380_length_1167_cov_3.869751	1	p1	(A)10	10	851	860
NODE_33388_length_2056_cov_3.940175	1	p1	(A)11	11	9	19
NODE_33388_length_2056_cov_3.940175	2	c	(T)11acaattctaaactaattttcataaaattctgccaacaagaagggaagaaaaattgacctttcatgcaatcaa(AG)9	101	417	517
NODE_33389_length_1051_cov_4.539486	1	p2	(AG)6	12	271	282
NODE_33392_length_1769_cov_5.235726	1	p3	(TCC)5	15	1165	1179
NODE_33399_length_1067_cov_4.159325	1	p2	(AT)15	30	1091	1120
NODE_33505_length_1941_cov_5.400309	1	p1	(A)10	10	631	640
NODE_33513_length_1663_cov_5.069152	1	c	(CT)12(CA)10	44	30	73
NODE_33526_length_3535_cov_5.236209	1	p2	(TG)6	12	1787	1798
NODE_33592_length_1964_cov_5.091141	1	p1	(T)12	12	329	340
NODE_33592_length_1964_cov_5.091141	2	p2	(CT)8	16	669	684
NODE_33592_length_1964_cov_5.091141	3	c	(AG)7atgcatgtcttgctcatcattttagttaatattttgaacgtttgaaaagctgaccgcttgcatgctgacatagatcgggtgtctca(CTT)6t(TTC)5	134	1509	1642
NODE_33599_length_1700_cov_5.021176	1	c	(AG)10aaagagaa(AG)8	44	1505	1548
NODE_33688_length_1268_cov_4.817035	1	p1	(A)20	20	1	20
NODE_33696_length_1621_cov_4.494756	1	c	(A)10tctttgcctgagagaagaacgatg(A)11	45	1	45
NODE_33696_length_1621_cov_4.494756	2	p2	(AG)7	14	172	185
NODE_33696_length_1621_cov_4.494756	3	p2	(AT)16	32	1158	1189
NODE_33696_length_1621_cov_4.494756	4	p2	(GA)7	14	1357	1370
NODE_33714_length_1814_cov_5.230430	1	p1	(T)12	12	1838	1849
NODE_33715_length_2070_cov_4.667633	1	p1	(A)11	11	1993	2003
NODE_33781_length_1041_cov_3.741595	1	p2	(TA)8	16	591	606
NODE_33787_length_1167_cov_5.319623	1	c	(T)10gttgataatgaagggtttctgtttcaccaacag(T)10	53	144	196
NODE_33787_length_1167_cov_5.319623	2	p3	(TTA)5	15	1172	1186
NODE_33807_length_962_cov_5.098752	1	p1	(A)10	10	270	279
NODE_33814_length_3240_cov_5.180864	1	p2	(AT)11	22	17	38
NODE_33861_length_2146_cov_4.966449	1	p2	(AG)7	14	847	860
NODE_33879_length_2058_cov_4.621477	1	p1	(A)14	14	1	14
NODE_33879_length_2058_cov_4.621477	2	p2	(AG)16	32	624	655
NODE_33880_length_2660_cov_4.974060	1	p2	(GT)8	16	1257	1272
NODE_33900_length_2111_cov_4.169588	1	p2	(TC)12	24	57	80
NODE_33945_length_1223_cov_4.579722	1	p1	(A)10	10	560	569
NODE_33980_length_1933_cov_4.890843	1	p1	(A)10	10	84	93
NODE_33980_length_1933_cov_4.890843	2	c	(TA)8atattttactataattattatatttatattattttatattaa(AT)7	72	366	437
NODE_33981_length_2990_cov_4.918395	1	p1	(T)11	11	120	130
NODE_34013_length_1544_cov_5.295337	1	p1	(A)13	13	1571	1583
NODE_34078_length_1229_cov_5.645240	1	p2	(AT)13	26	248	273
NODE_34080_length_1386_cov_4.474026	1	p2	(TA)6	12	251	262
NODE_34082_length_1258_cov_4.484897	1	p2	(AT)11	22	618	639
NODE_34083_length_1235_cov_4.206478	1	c	(GT)6(AT)9	30	184	213
NODE_34088_length_1038_cov_5.600193	1	p2	(CT)14	28	958	985
NODE_34102_length_1380_cov_5.081160	1	p1	(T)10	10	1102	1111
NODE_34173_length_1905_cov_4.406824	1	p2	(AT)8	16	211	226
NODE_34173_length_1905_cov_4.406824	2	p1	(A)10	10	854	863
NODE_34173_length_1905_cov_4.406824	3	p1	(T)10	10	1932	1941
NODE_34196_length_1071_cov_4.492997	1	p2	(GA)12	24	566	589
NODE_34211_length_1687_cov_5.326615	1	c	(TC)6cccctt(TA)8	34	333	366
NODE_34214_length_1838_cov_4.903700	1	p1	(T)10	10	758	767
NODE_34214_length_1838_cov_4.903700	2	p2	(AG)8	16	1356	1371
NODE_34214_length_1838_cov_4.903700	3	p1	(A)10	10	1851	1860
NODE_34292_length_1076_cov_5.235130	1	p1	(T)10	10	1106	1115
NODE_34372_length_1465_cov_4.640273	1	p2	(TC)9	18	1137	1154
NODE_34372_length_1465_cov_4.640273	2	p1	(T)12	12	1508	1519
NODE_34378_length_1040_cov_5.503846	1	p2	(CT)7	14	155	168
NODE_34393_length_1239_cov_6.005650	1	p2	(AC)9	18	119	136
NODE_34450_length_1712_cov_5.241822	1	p2	(AT)6	12	595	606
NODE_34450_length_1712_cov_5.241822	2	p2	(TA)6	12	1416	1427
NODE_34517_length_1073_cov_4.287045	1	p1	(T)14	14	9	22
NODE_34517_length_1073_cov_4.287045	2	p2	(AT)13	26	307	332
NODE_34545_length_1048_cov_5.252862	1	p1	(A)10	10	877	886
NODE_34546_length_1087_cov_4.505980	1	p2	(AG)7	14	354	367
NODE_34651_length_999_cov_4.396396	1	p1	(A)10	10	968	977
NODE_34652_length_2138_cov_4.631899	1	p1	(T)15	15	571	585
NODE_34660_length_1006_cov_4.148111	1	p1	(T)15	15	643	657
NODE_34700_length_1719_cov_4.453170	1	p1	(A)10	10	65	74
NODE_34700_length_1719_cov_4.453170	2	p1	(A)11	11	573	583
NODE_34724_length_1860_cov_4.320430	1	c	(AG)13g(GA)8	43	971	1013
NODE_34755_length_1271_cov_4.512195	1	p2	(TC)6	12	72	83
NODE_34755_length_1271_cov_4.512195	2	p3	(CAA)5	15	429	443
NODE_34931_length_1862_cov_5.122986	1	p1	(A)10	10	950	959
NODE_34936_length_1694_cov_4.425029	1	p1	(T)11	11	305	315
NODE_34948_length_3513_cov_4.842869	1	p2	(CT)24	48	1	48
NODE_34981_length_1048_cov_5.018130	1	c	(TC)11(TA)11	44	41	84
NODE_35031_length_2582_cov_6.107668	1	p1	(T)10	10	1193	1202
NODE_35063_length_1781_cov_4.391353	1	p1	(T)10	10	174	183
NODE_35063_length_1781_cov_4.391353	2	p2	(TC)9	18	1715	1732
NODE_35069_length_1141_cov_4.188431	1	p1	(A)11	11	623	633
NODE_35069_length_1141_cov_4.188431	2	p2	(AG)7	14	964	977
NODE_35131_length_2190_cov_4.952968	1	c	(TA)8(CA)12	40	1229	1268
NODE_35156_length_1933_cov_5.020693	1	p2	(AT)13	26	1846	1871
NODE_35170_length_2454_cov_4.797881	1	c	(CG)6agagagagg(GA)6	33	448	480
NODE_35202_length_981_cov_4.779817	1	p1	(T)10	10	299	308
NODE_35213_length_1140_cov_4.745614	1	p1	(T)10	10	48	57
NODE_35213_length_1140_cov_4.745614	2	c	(CT)9(GT)7	32	774	805
NODE_35324_length_1450_cov_4.235172	1	p2	(AG)6	12	1004	1015
NODE_35343_length_1262_cov_6.045959	1	p1	(A)11	11	1	11
NODE_35352_length_2625_cov_5.527619	1	p1	(A)11	11	2657	2667
NODE_35358_length_1664_cov_4.840745	1	p1	(A)11	11	906	916
NODE_35359_length_1740_cov_4.545977	1	p2	(GA)14	28	86	113
NODE_35359_length_1740_cov_4.545977	2	c	(GT)7(GA)12	38	267	304
NODE_35458_length_1374_cov_4.552402	1	p2	(TA)7	14	383	396
NODE_35458_length_1374_cov_4.552402	2	p2	(GA)6	12	881	892
NODE_35458_length_1374_cov_4.552402	3	p2	(GA)11	22	1025	1046
NODE_35529_length_1132_cov_5.360424	1	p3	(ATT)6	18	773	790
NODE_35541_length_1650_cov_4.790303	1	c	(TG)9(AG)9	36	647	682
NODE_35568_length_2041_cov_4.754042	1	p1	(T)10	10	8	17
NODE_35571_length_3304_cov_5.034503	1	p1	(T)12	12	1884	1895
NODE_35599_length_2345_cov_5.028572	1	p2	(TA)11	22	576	597
NODE_35599_length_2345_cov_5.028572	2	c	(T)11cttttctttttattgtccatcacctcaccat(TA)8	58	1910	1967
NODE_35599_length_2345_cov_5.028572	3	p2	(AT)9	18	2338	2355
NODE_35605_length_1353_cov_4.690318	1	p2	(AG)8	16	1154	1169
NODE_35605_length_1353_cov_4.690318	2	p2	(TC)8	16	1367	1382
NODE_35614_length_1982_cov_5.330474	1	c	(CT)8cc(CT)9	36	3	38
NODE_35614_length_1982_cov_5.330474	2	p1	(T)10	10	1888	1897
NODE_35657_length_2807_cov_7.867474	1	p1	(A)11	11	1374	1384
NODE_35657_length_2807_cov_7.867474	2	p1	(A)13	13	1777	1789
NODE_35660_length_1774_cov_5.146562	1	p2	(TA)7	14	324	337
NODE_35662_length_1793_cov_5.138316	1	p2	(GA)11	22	931	952
NODE_35692_length_3258_cov_5.023327	1	p1	(A)10	10	5	14
NODE_35692_length_3258_cov_5.023327	2	p1	(A)11	11	156	166
NODE_35692_length_3258_cov_5.023327	3	p2	(AG)7	14	381	394
NODE_35692_length_3258_cov_5.023327	4	p1	(A)16	16	3280	3295
NODE_35790_length_3123_cov_5.580532	1	p3	(TGG)5	15	2302	2316
NODE_35845_length_1593_cov_4.526052	1	p2	(TC)7	14	808	821
NODE_35846_length_2605_cov_4.680230	1	p2	(TC)7	14	372	385
NODE_35846_length_2605_cov_4.680230	2	p2	(TA)8	16	1800	1815
NODE_35846_length_2605_cov_4.680230	3	p1	(A)10	10	2650	2659
NODE_35865_length_2450_cov_5.251020	1	p1	(T)23	23	2482	2504
NODE_35906_length_957_cov_5.098224	1	p1	(A)10	10	330	339
NODE_35908_length_1177_cov_4.982158	1	p1	(A)10	10	1110	1119
NODE_35913_length_1112_cov_4.760791	1	p1	(T)11	11	1143	1153
NODE_35934_length_1399_cov_5.418870	1	c	(TA)7atttttaacatgactgtagattc(AT)17	71	158	228
NODE_35934_length_1399_cov_5.418870	2	p2	(GA)7	14	1230	1243
NODE_36138_length_1343_cov_4.653760	1	p2	(AG)17	34	668	701
NODE_36171_length_1651_cov_4.919443	1	p3	(AAT)6	18	941	958
NODE_36171_length_1651_cov_4.919443	2	p1	(T)13	13	1142	1154
NODE_36258_length_1548_cov_4.799742	1	c	(TC)11tgtc(TA)14	54	1	54
NODE_36258_length_1548_cov_4.799742	2	p2	(AT)12	24	475	498
NODE_36374_length_1236_cov_4.343851	1	c	(CT)21tatac(AT)6(GT)7ttagccccatgccattcagtgtgccttccttttcggcattgctagacagcattatctatatgtgtgtgcgtgt(TG)8	162	448	609
NODE_36374_length_1236_cov_4.343851	2	p1	(A)13	13	1265	1277
NODE_36376_length_1822_cov_5.204171	1	p2	(GA)17	34	1578	1611
NODE_36411_length_1333_cov_4.886722	1	p1	(A)10	10	3	12
NODE_36412_length_1641_cov_4.409506	1	c	(TG)7tc(AG)10	36	1162	1197
NODE_36429_length_1715_cov_4.660058	1	p1	(A)11	11	896	906
NODE_36432_length_1518_cov_5.117260	1	p2	(GA)22	44	1477	1520
NODE_36434_length_1614_cov_5.048327	1	p2	(AT)8	16	566	581
NODE_36480_length_1157_cov_5.480553	1	c	(GT)13(GA)8	42	21	62
NODE_36505_length_1774_cov_5.164600	1	p2	(AG)8	16	1254	1269
NODE_36505_length_1774_cov_5.164600	2	p3	(CAC)7	21	1430	1450
NODE_36524_length_1387_cov_4.248738	1	p1	(T)11	11	32	42
NODE_36524_length_1387_cov_4.248738	2	p1	(T)10	10	469	478
NODE_36531_length_2229_cov_4.751907	1	p3	(AGA)6	18	577	594
NODE_36550_length_979_cov_4.131767	1	p1	(A)11	11	1	11
NODE_36586_length_2020_cov_5.041089	1	p2	(TG)9	18	604	621
NODE_36588_length_1749_cov_5.424242	1	p2	(AT)7	14	422	435
NODE_36589_length_956_cov_4.763598	1	p2	(AC)7	14	812	825
NODE_36660_length_1203_cov_5.922693	1	p1	(T)10	10	133	142
NODE_36717_length_2390_cov_4.504602	1	c	(AT)8aa(AT)6aa(AT)17	66	401	466
NODE_36717_length_2390_cov_4.504602	2	p2	(AT)10	20	585	604
NODE_36740_length_1523_cov_5.311884	1	p1	(T)10	10	625	634
NODE_36758_length_1252_cov_14.010384	1	p1	(T)11	11	1028	1038
NODE_36758_length_1252_cov_14.010384	2	p2	(TC)8	16	1177	1192
NODE_36818_length_2621_cov_4.876001	1	p1	(T)10	10	950	959
NODE_36832_length_1496_cov_4.720588	1	c	(AT)6(AG)6	24	1	24
NODE_36832_length_1496_cov_4.720588	2	p2	(TA)14	28	294	321
NODE_36837_length_1293_cov_3.985306	1	p1	(T)12	12	473	484
NODE_36850_length_1577_cov_4.856056	1	p2	(TC)6	12	37	48
NODE_36866_length_2231_cov_5.537875	1	p1	(T)17	17	14	30
NODE_36866_length_2231_cov_5.537875	2	p2	(AT)8	16	2154	2169
NODE_36872_length_1768_cov_4.880656	1	c	(CA)19cg(CA)9cg(CA)11	82	1	82
NODE_36872_length_1768_cov_4.880656	2	p2	(TC)12	24	583	606
NODE_36879_length_1223_cov_4.586263	1	p2	(GT)8	16	242	257
NODE_36887_length_2183_cov_5.228584	1	p2	(AT)9	18	2099	2116
NODE_36952_length_1559_cov_4.869147	1	p1	(A)11	11	62	72
NODE_36952_length_1559_cov_4.869147	2	p2	(AG)12	24	864	887
NODE_37019_length_1071_cov_5.013072	1	p1	(A)13	13	1	13
NODE_37044_length_1132_cov_3.759717	1	p2	(AG)6	12	433	444
NODE_37045_length_990_cov_3.801010	1	p2	(TC)8	16	521	536
NODE_37058_length_4419_cov_5.490835	1	p1	(T)12	12	18	29
NODE_37060_length_2420_cov_5.046281	1	c	(TG)8tactaacacagacacagatacatattgacacatgcgcacacaa(AC)7	73	2210	2282
NODE_37114_length_1060_cov_5.397170	1	p1	(T)10	10	227	236
NODE_37115_length_1476_cov_5.672764	1	p1	(T)10	10	1270	1279
NODE_37307_length_1015_cov_5.055172	1	p3	(TTA)10	30	851	880
NODE_37392_length_1374_cov_4.580058	1	p2	(CT)18	36	118	153
NODE_37394_length_2253_cov_4.502441	1	p1	(A)11	11	1585	1595
NODE_37395_length_1538_cov_5.431729	1	p2	(AT)6	12	876	887
NODE_37395_length_1538_cov_5.431729	2	p1	(T)10	10	1323	1332
NODE_37411_length_1428_cov_4.761205	1	p2	(CT)8	16	1133	1148
NODE_37412_length_2776_cov_5.311599	1	c	(CT)6tctcttgatcaaagcccacaggaactgctgctggtgcatctctctcacctctgcccttgatcagaatccgcaagtgttctcggtgcg(TC)6	111	269	379
NODE_37412_length_2776_cov_5.311599	2	p2	(GA)10	20	1351	1370
NODE_37412_length_2776_cov_5.311599	3	p2	(AG)6	12	1525	1536
NODE_37412_length_2776_cov_5.311599	4	p2	(AG)9	18	1785	1802
NODE_37433_length_1766_cov_6.328992	1	p1	(A)10	10	604	613
NODE_37453_length_1265_cov_6.025296	1	p2	(CA)17	34	1104	1137
NODE_37499_length_1852_cov_4.646868	1	p2	(GA)9	18	1740	1757
NODE_37500_length_1046_cov_5.204589	1	c	(AT)8aattttgaaattttttttgcacctgcaccctgcgacatagcgtaaggcaaattcctctgctttagtttgctgtagctggttgc(T)10	109	701	809
NODE_37524_length_2701_cov_4.885228	1	p3	(AGA)5	15	1552	1566
NODE_37524_length_2701_cov_4.885228	2	p2	(AT)8	16	2366	2381
NODE_37528_length_1591_cov_3.784412	1	c	(CT)8t(TC)8	33	1245	1277
NODE_37595_length_1657_cov_4.653591	1	p1	(T)13	13	10	22
NODE_37608_length_1731_cov_5.387060	1	p1	(T)10	10	967	976
NODE_37608_length_1731_cov_5.387060	2	c	(CT)8gtctccatggcgccaatcctctcccctctctactgtatcattgtgcg(TTC)6	81	1171	1251
NODE_37620_length_1849_cov_5.058951	1	p1	(T)10	10	418	427
NODE_37625_length_1018_cov_3.703340	1	p1	(A)11	11	1	11
NODE_37625_length_1018_cov_3.703340	2	p1	(A)12	12	547	558
NODE_37666_length_2167_cov_4.819105	1	p1	(T)10	10	1080	1089
NODE_37692_length_1489_cov_5.861652	1	p1	(A)10	10	31	40
NODE_37710_length_1071_cov_5.017740	1	c	(GT)8gagtgagt(GA)14	52	818	869
NODE_37733_length_1950_cov_4.397949	1	p2	(TG)12	24	25	48
NODE_37737_length_1250_cov_4.809600	1	p1	(T)10	10	1294	1303
NODE_37818_length_2078_cov_5.502406	1	p2	(AG)19	38	983	1020
NODE_37819_length_2227_cov_4.231702	1	p2	(TA)19	38	2028	2065
NODE_37822_length_1031_cov_4.709991	1	p1	(T)10	10	278	287
NODE_37836_length_1450_cov_4.840000	1	p2	(AT)6	12	628	639
NODE_37872_length_2965_cov_4.953457	1	p1	(A)10	10	1422	1431
NODE_37872_length_2965_cov_4.953457	2	p2	(TA)12	24	1794	1817
NODE_37890_length_1070_cov_4.551402	1	p1	(T)16	16	41	56
NODE_37890_length_1070_cov_4.551402	2	p2	(TG)10	20	430	449
NODE_37895_length_2084_cov_5.165547	1	p2	(TA)8	16	49	64
NODE_37895_length_2084_cov_5.165547	2	p1	(T)12	12	272	283
NODE_37895_length_2084_cov_5.165547	3	p2	(TC)13	26	1512	1537
NODE_37918_length_1522_cov_4.785151	1	p1	(T)10	10	30	39
NODE_37918_length_1522_cov_4.785151	2	p2	(AT)6	12	855	866
NODE_37918_length_1522_cov_4.785151	3	p2	(TG)6	12	1036	1047
NODE_38004_length_2099_cov_5.505002	1	p2	(TC)6	12	1920	1931
NODE_38074_length_1062_cov_4.662900	1	p1	(A)10	10	34	43
NODE_38075_length_1398_cov_5.638054	1	p2	(TG)6	12	1060	1071
NODE_38079_length_3061_cov_5.185234	1	p2	(CT)7	14	1483	1496
NODE_38079_length_3061_cov_5.185234	2	p1	(A)10	10	2790	2799
NODE_38113_length_1778_cov_4.903262	1	c	(TC)6tttct(CA)9cg(GA)8	53	12	64
NODE_38119_length_2213_cov_5.219160	1	p2	(AG)6	12	164	175
NODE_38144_length_2748_cov_5.428675	1	p2	(AT)6	12	130	141
NODE_38144_length_2748_cov_5.428675	2	p2	(CT)12	24	766	789
NODE_38144_length_2748_cov_5.428675	3	p2	(GT)7	14	1110	1123
NODE_38144_length_2748_cov_5.428675	4	p3	(GCT)7	21	1453	1473
NODE_38144_length_2748_cov_5.428675	5	c	(AG)6gtcctttctccagtgtgactgacgtgaagcc(T)10	53	1746	1798
NODE_38150_length_1457_cov_4.770762	1	c	(T)11aatttacatgtaaattt(A)11	39	539	577
NODE_38150_length_1457_cov_4.770762	2	p1	(A)11	11	1348	1358
NODE_38165_length_1793_cov_4.680982	1	p1	(A)10	10	1538	1547
NODE_38201_length_1485_cov_4.519192	1	p1	(A)12	12	211	222
NODE_38201_length_1485_cov_4.519192	2	p1	(A)10	10	546	555
NODE_38203_length_951_cov_3.798107	1	p1	(T)10	10	16	25
NODE_38203_length_951_cov_3.798107	2	p2	(CT)6	12	370	381
NODE_38207_length_1403_cov_4.637919	1	p3	(TAT)5	15	189	203
NODE_38207_length_1403_cov_4.637919	2	p2	(TC)21	42	1347	1388
NODE_38250_length_2128_cov_5.101974	1	c	(AC)8ag(AT)16	50	1	50
NODE_38250_length_2128_cov_5.101974	2	p2	(TA)8	16	1348	1363
NODE_38356_length_2152_cov_4.606877	1	p2	(TA)19	38	1	38
NODE_38356_length_2152_cov_4.606877	2	c	(T)10(A)10gcatgttttttctagttttgaatggctgaattatttctcatgttttatgtacattaaaaaaaatgtgttttttgtgac(TA)7	112	326	437
NODE_38357_length_989_cov_4.259859	1	p2	(AT)16	32	985	1016
NODE_38391_length_2805_cov_5.889840	1	c	(AT)13(AC)14	54	1	54
NODE_38391_length_2805_cov_5.889840	2	p1	(A)12	12	2841	2852
NODE_38427_length_1439_cov_5.247394	1	p2	(TC)10	20	615	634
NODE_38442_length_1347_cov_3.949517	1	p2	(TA)21	42	1	42
NODE_38472_length_2330_cov_4.891846	1	p1	(A)16	16	592	607
NODE_38472_length_2330_cov_4.891846	2	p1	(A)10	10	774	783
NODE_38477_length_3002_cov_5.176882	1	p1	(A)10	10	2811	2820
NODE_38491_length_2126_cov_4.827846	1	c	(T)10c(T)11	22	3	24
NODE_38491_length_2126_cov_4.827846	2	p3	(CTT)7	21	687	707
NODE_38491_length_2126_cov_4.827846	3	p2	(TA)8	16	1467	1482
NODE_38495_length_1407_cov_4.835110	1	p1	(A)10	10	808	817
NODE_38496_length_3080_cov_4.375649	1	c	(TG)10tatgtgta(TG)10	48	451	498
NODE_38507_length_2131_cov_5.498358	1	p1	(A)10	10	1941	1950
NODE_38525_length_4103_cov_4.671460	1	p1	(T)10	10	3329	3338
NODE_38531_length_1867_cov_8.679700	1	p2	(AG)6	12	1121	1132
NODE_38531_length_1867_cov_8.679700	2	p1	(A)10	10	1275	1284
NODE_38531_length_1867_cov_8.679700	3	p2	(GA)12	24	1709	1732
NODE_38580_length_1366_cov_4.835286	1	p1	(T)10	10	528	537
NODE_38627_length_2175_cov_5.257471	1	p2	(AC)10	20	656	675
NODE_38627_length_2175_cov_5.257471	2	p2	(TA)8	16	885	900
NODE_38650_length_1800_cov_4.876667	1	p2	(TC)6	12	456	467
NODE_38661_length_2085_cov_4.288729	1	c	(T)10cattggtagtacgttgttctccttccaacttcagttggaaatgaatttttgttttgtaatactgagatga(TC)9	98	587	684
NODE_38700_length_3703_cov_4.892790	1	p2	(TC)15	30	228	257
NODE_38711_length_5506_cov_4.855793	1	p2	(CT)7	14	3908	3921
NODE_38780_length_2176_cov_5.304688	1	p1	(A)10	10	1738	1747
NODE_38780_length_2176_cov_5.304688	2	p2	(GT)6	12	2198	2209
NODE_38786_length_2393_cov_4.056832	1	p2	(TC)23	46	504	549
NODE_38786_length_2393_cov_4.056832	2	p2	(GA)18	36	2146	2181
NODE_38814_length_2308_cov_4.901213	1	p1	(A)10	10	2027	2036
NODE_38894_length_1574_cov_5.716010	1	c	(T)14aaagcaaatgaaagggaaaagggaagaaagaagggaaaaatcacaatctaaaaaaaatatcaaactgaaaatattgcagtttttc(A)11	110	27	136
NODE_38895_length_1351_cov_6.276092	1	p2	(TG)6	12	181	192
NODE_38906_length_1766_cov_4.658550	1	p4	(TTTC)5	20	1177	1196
NODE_38906_length_1766_cov_4.658550	2	c	(AC)6aaaggctattggggagtagtcatgtgtattatatatataa(AC)6	64	1379	1442
NODE_38916_length_4957_cov_8.897317	1	c	(CT)6ccctctcgct(CG)6	34	1255	1288
NODE_38936_length_1154_cov_4.324957	1	p2	(AT)8	16	504	519
NODE_38948_length_2993_cov_4.554962	1	p1	(A)10	10	79	88
NODE_38948_length_2993_cov_4.554962	2	p2	(GA)6	12	366	377
NODE_39051_length_957_cov_4.487983	1	p1	(A)13	13	984	996
NODE_39078_length_1818_cov_5.251375	1	c	(AG)7t(GA)8	31	282	312
NODE_39117_length_1028_cov_5.275292	1	p1	(A)10	10	855	864
NODE_39120_length_1349_cov_4.746479	1	p2	(CT)10	20	445	464
NODE_39123_length_1384_cov_5.172688	1	p1	(A)17	17	1	17
NODE_39161_length_2691_cov_4.527685	1	p1	(A)10	10	942	951
NODE_39214_length_1057_cov_3.710501	1	p1	(T)10	10	941	950
NODE_39247_length_2116_cov_4.698488	1	p1	(A)11	11	1836	1846
NODE_39286_length_1654_cov_4.568924	1	p3	(CCA)8	24	380	403
NODE_39312_length_2587_cov_4.923463	1	p1	(T)11	11	828	838
NODE_39312_length_2587_cov_4.923463	2	p1	(T)11	11	1054	1064
NODE_39312_length_2587_cov_4.923463	3	p2	(TA)6	12	2351	2362
NODE_39315_length_2074_cov_5.842334	1	p2	(CA)6	12	1047	1058
NODE_39315_length_2074_cov_5.842334	2	c	(A)10ttcttacagaaaaggaaatgcacaaaccacattttttaagttaacttcacaattcaca(TC)7	82	1210	1291
NODE_39319_length_998_cov_4.734469	1	p2	(TG)7	14	763	776
NODE_39358_length_1504_cov_4.758644	1	p2	(AG)14	28	56	83
NODE_39358_length_1504_cov_4.758644	2	p2	(AT)9	18	1270	1287
NODE_39376_length_2167_cov_4.220120	1	p1	(T)10	10	97	106
NODE_39376_length_2167_cov_4.220120	2	c	(TC)6ttactccatgtaaaaaaagttaagaaagtccacagcccattacgcgccttctctctccctctctctttcttaa(GC)10(AC)9	123	1620	1742
NODE_39440_length_1220_cov_4.965574	1	p1	(A)10	10	762	771
NODE_39468_length_3515_cov_5.478805	1	p1	(A)11	11	141	151
NODE_39504_length_2232_cov_5.537634	1	p1	(T)11	11	2269	2279
NODE_39508_length_1277_cov_5.278779	1	p5	(CGGGC)5	25	868	892
NODE_39508_length_1277_cov_5.278779	2	p6	(GGGAAG)5	30	1240	1269
NODE_39553_length_1033_cov_3.681510	1	p1	(T)10	10	3	12
NODE_39553_length_1033_cov_3.681510	2	p2	(CA)6	12	261	272
NODE_39553_length_1033_cov_3.681510	3	p2	(GT)6	12	897	908
NODE_39554_length_1063_cov_3.847601	1	p1	(A)15	15	257	271
NODE_39554_length_1063_cov_3.847601	2	c	(AC)11(AG)15	52	1066	1117
NODE_39615_length_2086_cov_5.007191	1	p2	(AT)9	18	172	189
NODE_39683_length_1180_cov_3.943220	1	p2	(CT)7	14	389	402
NODE_39683_length_1180_cov_3.943220	2	p2	(TC)11	22	789	810
NODE_39684_length_1654_cov_4.868803	1	p1	(A)10	10	1108	1117
NODE_39748_length_1410_cov_3.849645	1	p1	(A)12	12	1418	1429
NODE_39753_length_1158_cov_5.116580	1	p1	(A)12	12	426	437
NODE_39793_length_1455_cov_4.474227	1	c	(A)10ctgttgccggcatt(A)10	34	1387	1420
NODE_39802_length_1757_cov_4.929994	1	c	(TC)6(TG)11	34	489	522
NODE_39824_length_1131_cov_6.573829	1	p1	(T)13	13	42	54
NODE_39850_length_1578_cov_4.877693	1	c	(CT)9t(TA)9	37	1277	1313
NODE_39870_length_1780_cov_4.756742	1	p1	(A)14	14	1075	1088
NODE_39906_length_1212_cov_5.096535	1	p2	(CT)6	12	1089	1100
NODE_39943_length_1151_cov_4.490878	1	p3	(AGA)5	15	345	359
NODE_39947_length_1873_cov_5.848372	1	p1	(T)10	10	33	42
NODE_39953_length_1849_cov_5.259059	1	p1	(A)10	10	336	345
NODE_39953_length_1849_cov_5.259059	2	p1	(A)10	10	1331	1340
NODE_39960_length_3614_cov_5.103210	1	p2	(TA)23	46	1	46
NODE_39960_length_3614_cov_5.103210	2	p1	(T)10	10	1275	1284
NODE_40007_length_2026_cov_5.763574	1	p1	(T)10	10	511	520
NODE_40007_length_2026_cov_5.763574	2	p1	(A)10	10	1881	1890
NODE_40028_length_1087_cov_4.046918	1	p2	(GA)20	40	144	183
NODE_40029_length_1672_cov_5.831938	1	p1	(A)13	13	1706	1718
NODE_40069_length_4507_cov_5.085645	1	p1	(A)10	10	2324	2333
NODE_40077_length_3406_cov_4.836172	1	p1	(A)13	13	3054	3066
NODE_40083_length_1004_cov_4.568725	1	p1	(T)11	11	1012	1022
NODE_40084_length_1259_cov_4.664814	1	p2	(TA)23	46	1	46
NODE_40119_length_1106_cov_4.490054	1	p2	(AG)7	14	48	61
NODE_40119_length_1106_cov_4.490054	2	p2	(CT)22	44	1064	1107
NODE_40120_length_1139_cov_4.719052	1	p2	(GA)24	48	7	54
NODE_40138_length_1340_cov_4.955970	1	p2	(AT)8	16	397	412
NODE_40138_length_1340_cov_4.955970	2	p1	(A)10	10	1354	1363
NODE_40157_length_1040_cov_4.319231	1	c	(TC)7tttctt(TA)12	44	713	756
NODE_40202_length_987_cov_3.745694	1	c	(TA)7(TG)6	26	90	115
NODE_40202_length_987_cov_3.745694	2	p1	(T)13	13	1020	1032
NODE_40206_length_1368_cov_4.516082	1	p1	(T)11	11	21	31
NODE_40206_length_1368_cov_4.516082	2	p1	(T)10	10	742	751
NODE_40207_length_1616_cov_4.194926	1	p2	(AG)8	16	1333	1348
NODE_40207_length_1616_cov_4.194926	2	p2	(CT)7	14	1558	1571
NODE_40212_length_1193_cov_3.781224	1	c	(TA)8tgtgtatatattg(GA)6	41	444	484
NODE_40212_length_1193_cov_3.781224	2	p2	(AG)7	14	638	651
NODE_40212_length_1193_cov_3.781224	3	p2	(GA)6	12	806	817
NODE_40213_length_2871_cov_5.002438	1	c	(AG)7aaat(AG)7	32	1879	1910
NODE_40214_length_4211_cov_4.966041	1	p3	(TAA)6	18	2165	2182
NODE_40214_length_4211_cov_4.966041	2	p2	(TA)13	26	2592	2617
NODE_40214_length_4211_cov_4.966041	3	p4	(GTAT)8	32	4187	4218
NODE_40266_length_1418_cov_5.156559	1	p2	(AT)7	14	428	441
NODE_40266_length_1418_cov_5.156559	2	p2	(AT)6	12	1373	1384
NODE_40317_length_1905_cov_5.128084	1	p2	(CT)11	22	1633	1654
NODE_40404_length_956_cov_4.982218	1	p2	(GA)7	14	414	427
NODE_40404_length_956_cov_4.982218	2	c	(CT)6t(TC)8	29	792	820
NODE_40445_length_2794_cov_4.404796	1	p2	(AG)6	12	587	598
NODE_40452_length_1083_cov_4.301016	1	p1	(T)10	10	1097	1106
NODE_40505_length_2606_cov_4.713737	1	p1	(T)11	11	493	503
NODE_40505_length_2606_cov_4.713737	2	p1	(T)12	12	1569	1580
NODE_40518_length_2130_cov_5.240376	1	c	(TG)7agaa(AG)10	38	1463	1500
NODE_40540_length_2585_cov_4.342360	1	p2	(AC)7	14	704	717
NODE_40540_length_2585_cov_4.342360	2	p1	(T)10	10	2371	2380
NODE_40579_length_1945_cov_5.250900	1	p2	(TC)8	16	1464	1479
NODE_40584_length_956_cov_6.991632	1	p1	(G)10	10	1001	1010
NODE_40589_length_987_cov_4.868288	1	p1	(A)18	18	1	18
NODE_40592_length_1422_cov_4.368495	1	p1	(A)11	11	149	159
NODE_40611_length_2172_cov_4.385359	1	p1	(A)10	10	388	397
NODE_40639_length_2150_cov_4.609303	1	p1	(T)10	10	641	650
NODE_40641_length_1962_cov_4.794597	1	p2	(GA)11	22	752	773
NODE_40671_length_1307_cov_4.809487	1	p1	(A)10	10	49	58
NODE_40680_length_2640_cov_5.771970	1	p3	(TTA)5	15	4	18
NODE_40680_length_2640_cov_5.771970	2	p1	(T)10	10	1589	1598
NODE_40681_length_2757_cov_4.550236	1	p2	(TA)25	50	2762	2811
NODE_40683_length_2670_cov_4.608614	1	c	(AT)10agacagacataaagagctaattgtctagcaaactttatcttgttgcgacaggtgtcaagtccttatgaaatttcaaaaactcacatata(TG)9aaagagctccaagattgaacatctgtgaaacgccgtagttgggaaaaactggtagtggtctaactaatcactacaactgcttatcat(ATA)14	256	770	1025
NODE_40683_length_2670_cov_4.608614	2	c	(TTTC)5ttttgagcgcccatatttctctgagggggccaaacggtttagga(T)12	76	2543	2618
NODE_40705_length_1542_cov_4.125811	1	p2	(GA)8	16	90	105
NODE_40759_length_3091_cov_4.679068	1	p3	(GTG)5	15	493	507
NODE_40759_length_3091_cov_4.679068	2	p1	(T)17	17	3129	3145
NODE_40760_length_1904_cov_5.220588	1	p2	(AG)6	12	78	89
NODE_40760_length_1904_cov_5.220588	2	p1	(T)11	11	268	278
NODE_40764_length_1502_cov_4.881491	1	p1	(A)11	11	335	345
NODE_40764_length_1502_cov_4.881491	2	p2	(CA)12	24	1532	1555
NODE_40765_length_1340_cov_4.547015	1	p1	(T)12	12	898	909
NODE_40765_length_1340_cov_4.547015	2	p2	(TG)14	28	1344	1371
NODE_40766_length_2417_cov_4.916012	1	p2	(AG)6	12	248	259
NODE_40766_length_2417_cov_4.916012	2	c	(TC)7ttctgctattttttgtcttcttctagccagattttgtaaaatttgtgacagattatctcccaattttgtttcaatgcatcttttcatttgattgg(CT)7	123	1276	1398
NODE_40766_length_2417_cov_4.916012	3	p2	(TC)6	12	1587	1598
NODE_40780_length_1539_cov_4.517219	1	p2	(AG)8	16	1417	1432
NODE_40795_length_2399_cov_5.644018	1	p2	(GA)7	14	1854	1867
NODE_40805_length_2754_cov_4.954611	1	p1	(A)10	10	1590	1599
NODE_40805_length_2754_cov_4.954611	2	p2	(TA)7	14	2120	2133
NODE_40885_length_984_cov_3.741870	1	c	(A)10tgcaaaaaaaagtgataaattaaatgaccatttaaaacttaaaaagaacatttttttgaaaaaaaaagttaaaaacatgttgtttcacattttttttcac(T)10	120	10	129
NODE_40885_length_984_cov_3.741870	2	p1	(T)16	16	379	394
NODE_40957_length_1097_cov_5.949863	1	p1	(A)10	10	828	837
NODE_41014_length_1955_cov_5.201535	1	c	(TAC)6(TAA)6	36	1356	1391
NODE_41016_length_1295_cov_4.434749	1	p1	(T)16	16	6	21
NODE_41151_length_1131_cov_4.247569	1	p1	(T)11	11	19	29
NODE_41181_length_1092_cov_6.217033	1	p1	(T)14	14	1133	1146
NODE_41227_length_1004_cov_4.351593	1	p1	(T)11	11	27	37
NODE_41228_length_2375_cov_4.843790	1	p2	(TA)8	16	1015	1030
NODE_41232_length_1257_cov_4.038982	1	p2	(TG)11	22	7	28
NODE_41235_length_1635_cov_5.122936	1	p1	(A)11	11	1434	1444
NODE_41239_length_1005_cov_3.743284	1	c	(T)10acatatgagtgcattggac(T)12	41	459	499
NODE_41249_length_1070_cov_5.897196	1	p1	(A)10	10	109	118
NODE_41369_length_1884_cov_5.258492	1	p1	(T)11	11	7	17
NODE_41382_length_2219_cov_4.388012	1	p1	(A)11	11	1538	1548
NODE_41382_length_2219_cov_4.388012	2	p2	(AG)6	12	1893	1904
NODE_41398_length_1415_cov_4.809894	1	p1	(A)15	15	599	613
NODE_41415_length_2703_cov_4.954495	1	p2	(TC)6	12	13	24
NODE_41423_length_1659_cov_4.852923	1	p2	(AG)6	12	1304	1315
NODE_41423_length_1659_cov_4.852923	2	p2	(TA)13	26	1678	1703
NODE_41452_length_1975_cov_4.991393	1	p1	(T)12	12	2018	2029
NODE_41454_length_2259_cov_3.975653	1	p1	(A)10	10	321	330
NODE_41454_length_2259_cov_3.975653	2	p1	(A)10	10	1637	1646
NODE_41455_length_1334_cov_5.456522	1	p2	(TA)10	20	862	881
NODE_41497_length_2364_cov_4.588832	1	c	(TG)7(T)13	27	135	161
NODE_41599_length_2025_cov_5.084938	1	p1	(A)10	10	97	106
NODE_41602_length_952_cov_4.819328	1	p1	(T)11	11	895	905
NODE_41666_length_1264_cov_4.444620	1	p3	(GGT)7	21	586	606
NODE_41678_length_2342_cov_4.906917	1	p1	(T)10	10	223	232
NODE_41679_length_1774_cov_5.132469	1	c	(TG)9(AG)9	36	950	985
NODE_41684_length_1409_cov_5.261888	1	p1	(T)10	10	448	457
NODE_41684_length_1409_cov_5.261888	2	p1	(T)10	10	1434	1443
NODE_41691_length_2674_cov_4.746447	1	p2	(CT)8	16	1071	1086
NODE_41718_length_2048_cov_5.275391	1	p2	(GT)6	12	316	327
NODE_41719_length_1097_cov_4.677302	1	p2	(TA)8	16	154	169
NODE_41766_length_2444_cov_4.844926	1	p1	(T)11	11	1872	1882
NODE_41766_length_2444_cov_4.844926	2	p2	(TC)8	16	2438	2453
NODE_41856_length_985_cov_4.781726	1	p1	(T)11	11	31	41
NODE_41911_length_2781_cov_5.340166	1	p1	(T)10	10	852	861
NODE_41911_length_2781_cov_5.340166	2	p1	(A)10	10	2805	2814
NODE_41918_length_1157_cov_4.150389	1	p2	(AT)6	12	698	709
NODE_41918_length_1157_cov_4.150389	2	p2	(TA)11	22	936	957
NODE_41991_length_1404_cov_4.514245	1	c	(A)19ccgttttatacttcaaaaataggtcagg(A)10	57	1	57
NODE_42020_length_2237_cov_4.466249	1	p2	(GT)6	12	590	601
NODE_42038_length_1924_cov_4.930354	1	c	(A)14tcaaatatgaagtccccatagatttacattattcatctatttat(A)11	69	5	73
NODE_42038_length_1924_cov_4.930354	2	p4	(CTCA)6	24	179	202
NODE_42040_length_1244_cov_4.940515	1	p2	(AG)7	14	148	161
NODE_42161_length_1193_cov_5.253982	1	p1	(T)11	11	29	39
NODE_42166_length_1399_cov_4.686204	1	c	(AC)6(AG)14	40	214	253
NODE_42166_length_1399_cov_4.686204	2	p2	(GT)6	12	614	625
NODE_42166_length_1399_cov_4.686204	3	p2	(AT)10	20	1106	1125
NODE_42167_length_1076_cov_6.114312	1	p1	(T)10	10	574	583
NODE_42168_length_2830_cov_5.485512	1	p2	(AT)15	30	476	505
NODE_42170_length_1495_cov_5.516388	1	p1	(T)12	12	1538	1549
NODE_42171_length_1774_cov_4.764374	1	p2	(AC)8	16	1594	1609
NODE_42171_length_1774_cov_4.764374	2	p1	(A)10	10	1819	1828
NODE_42172_length_2002_cov_4.089411	1	c	(TG)9ttgt(AC)7	36	411	446
NODE_42188_length_1808_cov_5.029314	1	p1	(T)11	11	47	57
NODE_42188_length_1808_cov_5.029314	2	p3	(TTA)8	24	983	1006
NODE_42188_length_1808_cov_5.029314	3	c	(A)10gcaaatggtgtttgcctgtttatatcgaacaagacgaaaatttaaagagcgtgaattatttcatatcttgtcag(A)11	95	1216	1310
NODE_42189_length_1332_cov_22.963964	1	p2	(TA)6	12	1196	1207
NODE_42204_length_2804_cov_4.952568	1	p1	(A)16	16	2	17
NODE_42204_length_2804_cov_4.952568	2	p2	(CT)8	16	1403	1418
NODE_42205_length_1551_cov_5.344939	1	p1	(A)17	17	2	18
NODE_42205_length_1551_cov_5.344939	2	p3	(TAA)6	18	1267	1284
NODE_42235_length_1355_cov_4.098155	1	p2	(AT)11	22	1164	1185
NODE_42348_length_1975_cov_5.229367	1	p2	(TC)8	16	225	240
NODE_42358_length_2416_cov_5.307533	1	p2	(TA)9	18	2417	2434
NODE_42380_length_1366_cov_4.758419	1	c	(TA)7gatagat(AG)16	53	1051	1103
NODE_42380_length_1366_cov_4.758419	2	p1	(A)11	11	1385	1395
NODE_42400_length_2924_cov_4.649795	1	p1	(T)10	10	924	933
NODE_42422_length_3595_cov_4.809179	1	p2	(AG)6	12	2932	2943
NODE_42432_length_1494_cov_5.736279	1	p1	(G)16	16	1528	1543
NODE_42441_length_1193_cov_5.880972	1	p1	(T)10	10	201	210
NODE_42445_length_2744_cov_5.142493	1	p1	(A)10	10	314	323
NODE_42447_length_971_cov_5.647786	1	p2	(AG)8	16	49	64
NODE_42460_length_1790_cov_5.398324	1	p2	(TC)6	12	1418	1429
NODE_42572_length_1406_cov_5.029161	1	p1	(T)10	10	231	240
NODE_42572_length_1406_cov_5.029161	2	p2	(GT)7	14	1292	1305
NODE_42637_length_1820_cov_4.762637	1	p2	(TA)6	12	992	1003
NODE_42676_length_1372_cov_5.607872	1	p2	(TG)16	32	1060	1091
NODE_42694_length_2126_cov_9.640639	1	p2	(CT)6	12	119	130
NODE_42712_length_1787_cov_4.593732	1	p1	(T)14	14	1828	1841
NODE_42713_length_2143_cov_4.706486	1	p3	(AGG)6	18	326	343
NODE_42725_length_2551_cov_4.876911	1	p2	(TC)10	20	246	265
NODE_42725_length_2551_cov_4.876911	2	p1	(T)10	10	1768	1777
NODE_42781_length_1368_cov_4.395468	1	p2	(AG)7	14	47	60
NODE_42781_length_1368_cov_4.395468	2	p2	(AG)7	14	982	995
NODE_42781_length_1368_cov_4.395468	3	p2	(AT)7	14	1214	1227
NODE_42782_length_1309_cov_4.941940	1	p2	(TA)9	18	1	18
NODE_42782_length_1309_cov_4.941940	2	p2	(TA)15	30	856	885
NODE_42785_length_2371_cov_5.203712	1	p2	(CT)6	12	530	541
NODE_42790_length_2529_cov_4.786872	1	p2	(TA)9	18	1	18
NODE_42790_length_2529_cov_4.786872	2	p2	(CA)6	12	166	177
NODE_42804_length_1527_cov_4.654224	1	p2	(AG)17	34	779	812
NODE_42804_length_1527_cov_4.654224	2	p1	(T)11	11	1374	1384
NODE_42923_length_953_cov_4.693599	1	c	(GT)6gagtgtctgtga(GT)9(AT)9	60	504	563
NODE_42924_length_1570_cov_5.450955	1	p2	(TC)7	14	1	14
NODE_42924_length_1570_cov_5.450955	2	p1	(A)10	10	1614	1623
NODE_42925_length_986_cov_5.205883	1	p1	(A)11	11	98	108
NODE_42927_length_1369_cov_5.566837	1	c	(CT)11ata(AT)7	39	476	514
NODE_42927_length_1369_cov_5.566837	2	p2	(TA)10	20	1131	1150
NODE_42927_length_1369_cov_5.566837	3	p2	(AG)11	22	1347	1368
NODE_42969_length_1328_cov_4.998494	1	p1	(T)10	10	164	173
NODE_42969_length_1328_cov_4.998494	2	c	(TC)7tttctctctctataga(TG)6tttatttttatgtgtgcactacttatccaaaaactttatataacacggaaactcattttcttgctcaaaaaag(A)11	126	1232	1357
NODE_42978_length_1735_cov_4.476081	1	p3	(GGT)5	15	1296	1310
NODE_42981_length_2440_cov_5.443852	1	p2	(AG)7	14	2044	2057
NODE_42982_length_1383_cov_4.478670	1	p2	(AG)11	22	1011	1032
NODE_42984_length_2126_cov_5.329727	1	p2	(AG)7	14	1335	1348
NODE_42984_length_2126_cov_5.329727	2	p2	(TC)7	14	1536	1549
NODE_42984_length_2126_cov_5.329727	3	p1	(T)10	10	2093	2102
NODE_43000_length_2741_cov_5.225830	1	p2	(AG)7	14	2653	2666
NODE_43007_length_1931_cov_4.684102	1	p2	(TC)7	14	510	523
NODE_43008_length_3074_cov_4.864021	1	c	(TG)10(AG)8	36	702	737
NODE_43009_length_2889_cov_4.650744	1	p3	(CTT)7	21	2723	2743
NODE_43057_length_1387_cov_4.834175	1	c	(TA)13(TG)8ttccatgcaccatttagagtgcatggaatataaaaggctatatgcaatgtagtttgataatttaaacttacatgtttaaataag(A)10	136	1066	1201
NODE_43080_length_1112_cov_4.971223	1	p1	(T)11	11	592	602
NODE_43138_length_1500_cov_5.784000	1	p1	(A)10	10	1344	1353
NODE_43165_length_2388_cov_4.839615	1	p2	(GA)8	16	1072	1087
NODE_43227_length_2794_cov_5.111668	1	p2	(GA)6	12	2346	2357
NODE_43245_length_1811_cov_5.416345	1	p2	(CA)11	22	1571	1592
NODE_43257_length_1759_cov_5.002842	1	p2	(TC)9	18	1589	1606
NODE_43299_length_1425_cov_5.009123	1	p2	(AG)8	16	8	23
NODE_43305_length_1075_cov_4.911628	1	p1	(A)10	10	44	53
NODE_43309_length_1787_cov_4.819250	1	p1	(A)14	14	14	27
NODE_43334_length_1301_cov_4.160645	1	p1	(A)11	11	447	457
NODE_43363_length_4150_cov_4.971325	1	p2	(AG)6	12	1228	1239
NODE_43365_length_1351_cov_4.369356	1	p2	(TA)7	14	961	974
NODE_43373_length_1982_cov_4.380424	1	c	(AT)11(AG)9ggagggagaggttgattcagatcatatggatgcccaaatgctgctggatggtaaaaaatt(A)11	111	702	812
NODE_43373_length_1982_cov_4.380424	2	p2	(AC)7	14	932	945
NODE_43373_length_1982_cov_4.380424	3	c	(GT)11(AT)7	36	1138	1173
NODE_43373_length_1982_cov_4.380424	4	p1	(T)10	10	1368	1377
NODE_43377_length_1967_cov_4.850534	1	p2	(GA)7	14	1228	1241
NODE_43381_length_2241_cov_4.781794	1	p1	(T)12	12	1092	1103
NODE_43385_length_1237_cov_5.313662	1	c	(TA)6tccaa(AG)6ggaggtaggaatacacagaatatacagaaaatatatatggatacacaactataaagttccatcattcatataattttaacagct(AC)7	127	859	985
NODE_43413_length_1558_cov_4.769577	1	p1	(A)10	10	619	628
NODE_43427_length_1058_cov_4.848771	1	p3	(AGC)6	18	677	694
NODE_43472_length_1481_cov_4.318704	1	p1	(T)11	11	659	669
NODE_43475_length_1967_cov_5.214032	1	p2	(TC)16	32	1833	1864
NODE_43497_length_1209_cov_4.295285	1	p2	(TA)11	22	1	22
NODE_43500_length_1158_cov_4.895510	1	p1	(T)10	10	1121	1130
NODE_43501_length_1903_cov_4.787704	1	p2	(GT)11	22	1078	1099
NODE_43537_length_1520_cov_4.600658	1	p3	(CTT)5	15	1358	1372
NODE_43596_length_1531_cov_3.893534	1	p2	(CT)6	12	83	94
NODE_43596_length_1531_cov_3.893534	2	p2	(TG)7	14	1003	1016
NODE_43600_length_1254_cov_5.308612	1	p2	(AT)12	24	744	767
NODE_43663_length_1894_cov_4.964625	1	p1	(A)10	10	319	328
NODE_43664_length_1944_cov_4.755659	1	p2	(TG)6	12	97	108
NODE_43700_length_2213_cov_5.275644	1	p2	(TC)14	28	1480	1507
NODE_43700_length_2213_cov_5.275644	2	p1	(T)12	12	1729	1740
NODE_43703_length_2218_cov_4.549594	1	p2	(CT)6	12	1108	1119
NODE_43705_length_1907_cov_4.984269	1	p1	(T)11	11	1913	1923
[truncated: 44,035 more rows]
