# Supplementary material for: Contrasting Reproductive Strategies of Two Nymphaea Species Affect Existing Natural Genetic Diversity as Assessed by Microsatellite Markers: Implications for Conservation and Wetlands Restoration
Source: Front Plant Sci. 2022 Mar 9;13:773572. doi: 10.3389/fpls.2022.773572 (PMC8965595; doi:10.3389/fpls.2022.773572)
Supplement: Supplementary Table 5 — Annotation details of 12556 non-redundant SSR containing sequences. [file Table_5.XLSX]

## Sheet: Sheet1
Supplementary Table 5: Annotation details of 12556 non-redundant SSR containing sequences.
seq ID	NP ID	per	e-value	bit-score	Gene Name	Species	COG_ONTOLOGY	GOTERM_BP_DIRECT	GOTERM_CC_DIRECT	GOTERM_MF_DIRECT	INTERPRO	KEGG_PATHWAY	PIR_SUPERFAMILY	SMART	UP_KEYWORDS	UP_SEQ_FEATURE
NODE_1000789_length_1339_cov_5.226288	NP_001326328	30.435	2.84e-23	102	GDSL-like Lipase/Acylhydrolase superfamily protein(AT3G09930)	Arabidopsis thaliana		GO:0016042~lipid catabolic process,	GO:0005576~extracellular region,	GO:0016298~lipase activity,GO:0016788~hydrolase activity, acting on ester bonds,GO:0052689~carboxylic ester hydrolase activity,	IPR001087:Lipase, GDSL,				Complete proteome,Glycoprotein,Hydrolase,Lipid degradation,Lipid metabolism,Reference proteome,Secreted,Signal,	chain:GDSL esterase/lipase At3g09930,glycosylation site:N-linked (GlcNAc...),sequence conflict,signal peptide,
NODE_100256_length_2858_cov_4.954864	NP_001314629	52.351	7.81e-77	265	mitogen-activated protein kinase 20-like(LOC107959667)	Gossypium hirsutum			GO:0005622~intracellular,	GO:0004707~MAP kinase activity,GO:0005524~ATP binding,	IPR000719:Protein kinase, catalytic domain,IPR003527:Mitogen-activated protein (MAP) kinase, conserved site,IPR011009:Protein kinase-like domain,IPR017441:Protein kinase, ATP binding site,			SM00220:S_TKc,	ATP-binding,Kinase,Nucleotide-binding,Serine/threonine-protein kinase,Transferase,
NODE_100338_length_1315_cov_4.372623	NP_001234740	36.126	6.34e-18	88.2	auxin response factor 19(ARF19)	Solanum lycopersicum		GO:0006351~transcription, DNA-templated,GO:0006355~regulation of transcription, DNA-templated,GO:0009734~auxin-activated signaling pathway,	GO:0005634~nucleus,	GO:0003677~DNA binding,	IPR000270:Phox/Bem1p,IPR003340:B3 DNA binding domain,IPR010525:Auxin response factor,IPR015300:DNA-binding pseudobarrel domain,			SM01019:SM01019,	Auxin signaling pathway,Complete proteome,DNA-binding,Nucleus,Reference proteome,Transcription,Transcription regulation,
NODE_411197_length_1338_cov_5.639761	NP_001234740	51.515	2.82e-17	86.3	auxin response factor 19(ARF19)	Solanum lycopersicum		GO:0006351~transcription, DNA-templated,GO:0006355~regulation of transcription, DNA-templated,GO:0009734~auxin-activated signaling pathway,	GO:0005634~nucleus,	GO:0003677~DNA binding,	IPR000270:Phox/Bem1p,IPR003340:B3 DNA binding domain,IPR010525:Auxin response factor,IPR015300:DNA-binding pseudobarrel domain,			SM01019:SM01019,	Auxin signaling pathway,Complete proteome,DNA-binding,Nucleus,Reference proteome,Transcription,Transcription regulation,
NODE_1007532_length_1358_cov_4.399853	NP_001238050	97.917	2.33e-24	102	uncharacterized LOC100305619(LOC100305619)	Glycine max		GO:0000027~ribosomal large subunit assembly,GO:0006412~translation,	GO:0022625~cytosolic large ribosomal subunit,	GO:0003735~structural constituent of ribosome,	IPR001197:Ribosomal protein L10e,IPR016180:Ribosomal protein L10e/L16,IPR018255:Ribosomal protein L10e, conserved site,	gmx03010:Ribosome,	PIRSF005590:ribosomal protein L10a/L10e types,		Complete proteome,Reference proteome,
NODE_1007532_length_1358_cov_4.399853	NP_564878	95.833	1.22e-23	100	senescence associated gene 24(SAG24)	Arabidopsis thaliana		GO:0000027~ribosomal large subunit assembly,GO:0006412~translation,GO:0010224~response to UV-B,GO:0032502~developmental process,	GO:0005634~nucleus,GO:0005737~cytoplasm,GO:0005773~vacuole,GO:0005774~vacuolar membrane,GO:0005794~Golgi apparatus,GO:0005829~cytosol,GO:0005840~ribosome,GO:0022625~cytosolic large ribosomal subunit,GO:0022626~cytosolic ribosome,	GO:0003735~structural constituent of ribosome,	IPR001197:Ribosomal protein L10e,IPR016180:Ribosomal protein L10e/L16,IPR018255:Ribosomal protein L10e, conserved site,	ath03010:Ribosome,	PIRSF005590:ribosomal protein L10a/L10e types,		Complete proteome,Reference proteome,Ribonucleoprotein,Ribosomal protein,	chain:60S ribosomal protein L10-3,
NODE_1008579_length_1076_cov_4.520446	NP_001130810	58.333	1.9e-08	57	uncharacterized LOC100191914(LOC100191914)	Zea mays				GO:0016757~transferase activity, transferring glycosyl groups,	IPR002495:Glycosyl transferase, family 8,				Complete proteome,Reference proteome,Signal,Transferase,
NODE_1418875_length_3687_cov_17.328993	NP_001130810	48.387	1.94e-12	58.2	uncharacterized LOC100191914(LOC100191914)	Zea mays				GO:0016757~transferase activity, transferring glycosyl groups,	IPR002495:Glycosyl transferase, family 8,				Complete proteome,Reference proteome,Signal,Transferase,
NODE_1009589_length_1466_cov_5.229877	NP_567420	80.952	3.37e-16	78.6	transferases, transferring glycosyl groups(AT4G14100)	Arabidopsis thaliana			GO:0005773~vacuole,GO:0009507~chloroplast,	GO:0016757~transferase activity, transferring glycosyl groups,					Complete proteome,Reference proteome,Signal,	chain:Uncharacterized protein At4g14100,sequence conflict,signal peptide,
NODE_1009589_length_1466_cov_5.229877	NP_566739	76.19	8.89e-16	77	transferring glycosyl group transferase(AT3G23760)	Arabidopsis thaliana			GO:0005576~extracellular region,GO:0005773~vacuole,						Complete proteome,Reference proteome,Signal,
NODE_1009589_length_1466_cov_5.229877	NP_001237129	73.81	1.63e-13	71.2	uncharacterized LOC100306330(LOC100306330)	Glycine max									Signal,
NODE_1012505_length_1255_cov_4.741833	NP_001275368	67.935	3.21e-72	220	BEL1-related homeotic protein 30(BEL30)	Solanum tuberosum		GO:0006355~regulation of transcription, DNA-templated,	GO:0005634~nucleus,	GO:0003677~DNA binding,	IPR001356:Homeodomain,IPR006563:POX,IPR008422:Homeobox KN domain,IPR009057:Homeodomain-like,			SM00389:HOX,SM00574:POX,	Complete proteome,DNA-binding,Homeobox,Nucleus,Reference proteome,
NODE_1013157_length_2100_cov_5.182381	NP_193190	95.699	6.98e-56	189	nuclear factor Y, subunit B3(NF-YB3)	Arabidopsis thaliana		GO:0006351~transcription, DNA-templated,GO:0006355~regulation of transcription, DNA-templated,	GO:0005634~nucleus,	GO:0003700~transcription factor activity, sequence-specific DNA binding,GO:0043565~sequence-specific DNA binding,GO:0046982~protein heterodimerization activity,	IPR003956:Transcription factor, NFYB/HAP3, conserved site,IPR003958:Transcription factor CBF/NF-Y/archaeal histone,IPR009072:Histone-fold,				Acetylation,Activator,Complete proteome,DNA-binding,Nucleus,Reference proteome,Transcription,Transcription regulation,	chain:Nuclear transcription factor Y subunit B- 3,compositionally biased region:Gly-rich,region of interest:Subunit association domain (SAD),
NODE_1013157_length_2100_cov_5.182381	NP_001236061	92.708	1.3e-55	188	uncharacterized LOC100500556(LOC100500556)	Glycine max		GO:0006355~regulation of transcription, DNA-templated,	GO:0005634~nucleus,	GO:0043565~sequence-specific DNA binding,	IPR003956:Transcription factor, NFYB/HAP3, conserved site,IPR003958:Transcription factor CBF/NF-Y/archaeal histone,IPR009072:Histone-fold,				Nucleus,
NODE_1013980_length_1058_cov_5.142722	NP_001140579	68.519	5e-19	88.6	uncharacterized LOC100272649(pco103710)	Zea mays	General function prediction only,			GO:0003993~acid phosphatase activity,GO:0016787~hydrolase activity,	IPR004843:Metallophosphoesterase domain,IPR024927:Acid phosphatase, type 5,		PIRSF000898:acid phosphatase, type 5,		Complete proteome,Reference proteome,Signal,
NODE_1014815_length_1545_cov_4.649191	NP_172259	56.383	8.29e-23	104	ER-type Ca2+-ATPase 1(ECA1)	Arabidopsis thaliana		GO:0006816~calcium ion transport,GO:0006828~manganese ion transport,GO:0010042~response to manganese ion,GO:0030026~cellular manganese ion homeostasis,GO:0046686~response to cadmium ion,	GO:0005634~nucleus,GO:0005774~vacuolar membrane,GO:0005783~endoplasmic reticulum,GO:0005789~endoplasmic reticulum membrane,GO:0005886~plasma membrane,GO:0005887~integral component of plasma membrane,GO:0030176~integral component of endoplasmic reticulum membrane,	GO:0005388~calcium-transporting ATPase activity,GO:0005524~ATP binding,GO:0046872~metal ion binding,	IPR001757:Cation-transporting P-type ATPase,IPR004014:Cation-transporting P-type ATPase, N-terminal,IPR006068:Cation-transporting P-type ATPase, C-terminal,IPR008250:P-type ATPase, A domain,IPR018303:P-type ATPase, phosphorylation site,IPR023214:HAD-like domain,IPR023298:P-type ATPase, transmembrane domain,IPR023299:P-type ATPase, cytoplasmic domain N,			SM00831:SM00831,	ATP-binding,Calcium,Calcium transport,Complete proteome,Endoplasmic reticulum,Hydrolase,Ion transport,Magnesium,Manganese,Membrane,Metal-binding,Nucleotide-binding,Reference proteome,Transmembrane,Transmembrane helix,Transport,	active site:4-aspartylphosphate intermediate,chain:Calcium-transporting ATPase 1, endoplasmic reticulum-type,metal ion-binding site:Calcium 1,metal ion-binding site:Calcium 2,metal ion-binding site:Calcium 2; via carbonyl oxygen,metal ion-binding site:Magnesium,sequence variant,topological domain:Cytoplasmic,topological domain:Lumenal,transmembrane region,
NODE_183470_length_3106_cov_4.531874	NP_172259	71.892	1.33e-76	274	ER-type Ca2+-ATPase 1(ECA1)	Arabidopsis thaliana		GO:0006816~calcium ion transport,GO:0006828~manganese ion transport,GO:0010042~response to manganese ion,GO:0030026~cellular manganese ion homeostasis,GO:0046686~response to cadmium ion,	GO:0005634~nucleus,GO:0005774~vacuolar membrane,GO:0005783~endoplasmic reticulum,GO:0005789~endoplasmic reticulum membrane,GO:0005886~plasma membrane,GO:0005887~integral component of plasma membrane,GO:0030176~integral component of endoplasmic reticulum membrane,	GO:0005388~calcium-transporting ATPase activity,GO:0005524~ATP binding,GO:0046872~metal ion binding,	IPR001757:Cation-transporting P-type ATPase,IPR004014:Cation-transporting P-type ATPase, N-terminal,IPR006068:Cation-transporting P-type ATPase, C-terminal,IPR008250:P-type ATPase, A domain,IPR018303:P-type ATPase, phosphorylation site,IPR023214:HAD-like domain,IPR023298:P-type ATPase, transmembrane domain,IPR023299:P-type ATPase, cytoplasmic domain N,			SM00831:SM00831,	ATP-binding,Calcium,Calcium transport,Complete proteome,Endoplasmic reticulum,Hydrolase,Ion transport,Magnesium,Manganese,Membrane,Metal-binding,Nucleotide-binding,Reference proteome,Transmembrane,Transmembrane helix,Transport,	active site:4-aspartylphosphate intermediate,chain:Calcium-transporting ATPase 1, endoplasmic reticulum-type,metal ion-binding site:Calcium 1,metal ion-binding site:Calcium 2,metal ion-binding site:Calcium 2; via carbonyl oxygen,metal ion-binding site:Magnesium,sequence variant,topological domain:Cytoplasmic,topological domain:Lumenal,transmembrane region,
NODE_439178_length_1469_cov_5.518040	NP_172259	69.697	1.19e-11	52.8	ER-type Ca2+-ATPase 1(ECA1)	Arabidopsis thaliana		GO:0006816~calcium ion transport,GO:0006828~manganese ion transport,GO:0010042~response to manganese ion,GO:0030026~cellular manganese ion homeostasis,GO:0046686~response to cadmium ion,	GO:0005634~nucleus,GO:0005774~vacuolar membrane,GO:0005783~endoplasmic reticulum,GO:0005789~endoplasmic reticulum membrane,GO:0005886~plasma membrane,GO:0005887~integral component of plasma membrane,GO:0030176~integral component of endoplasmic reticulum membrane,	GO:0005388~calcium-transporting ATPase activity,GO:0005524~ATP binding,GO:0046872~metal ion binding,	IPR001757:Cation-transporting P-type ATPase,IPR004014:Cation-transporting P-type ATPase, N-terminal,IPR006068:Cation-transporting P-type ATPase, C-terminal,IPR008250:P-type ATPase, A domain,IPR018303:P-type ATPase, phosphorylation site,IPR023214:HAD-like domain,IPR023298:P-type ATPase, transmembrane domain,IPR023299:P-type ATPase, cytoplasmic domain N,			SM00831:SM00831,	ATP-binding,Calcium,Calcium transport,Complete proteome,Endoplasmic reticulum,Hydrolase,Ion transport,Magnesium,Manganese,Membrane,Metal-binding,Nucleotide-binding,Reference proteome,Transmembrane,Transmembrane helix,Transport,	active site:4-aspartylphosphate intermediate,chain:Calcium-transporting ATPase 1, endoplasmic reticulum-type,metal ion-binding site:Calcium 1,metal ion-binding site:Calcium 2,metal ion-binding site:Calcium 2; via carbonyl oxygen,metal ion-binding site:Magnesium,sequence variant,topological domain:Cytoplasmic,topological domain:Lumenal,transmembrane region,
NODE_1016633_length_1555_cov_4.551768	NP_001326579	57.895	5.89e-16	75.5	Adenine nucleotide alpha hydrolases-like superfamily protein(AT3G17020)	Arabidopsis thaliana		GO:0009409~response to cold,	GO:0005737~cytoplasm,GO:0005886~plasma membrane,	GO:0016787~hydrolase activity,	IPR006015:Universal stress protein A,IPR006016:UspA,IPR014729:Rossmann-like alpha/beta/alpha sandwich fold,				Complete proteome,Hydrolase,Reference proteome,
NODE_1017160_length_1699_cov_3.889935	NP_001167908	39.925	5.47e-45	162	uncharacterized LOC100381620(LOC100381620)	Zea mays					IPR008586:Protein of unknown function DUF868, plant,				Complete proteome,Reference proteome,
NODE_1017964_length_1312_cov_3.987805	NP_001241918	92.157	2.19e-16	79.7	uncharacterized LOC100789769(LOC100789769)	Glycine max				GO:0008270~zinc ion binding,	IPR001841:Zinc finger, RING-type,IPR013083:Zinc finger, RING/FYVE/PHD-type,IPR017907:Zinc finger, RING-type, conserved site,			SM00184:RING,	Complete proteome,Reference proteome,
NODE_1018936_length_1422_cov_4.710267	NP_001296278	86.111	1.92e-13	70.5	transcription factor WER-like(LOC105792052)	Gossypium raimondii				GO:0003677~DNA binding,	IPR001005:SANT/Myb domain,IPR009057:Homeodomain-like,IPR017930:Myb domain,			SM00717:SANT,
NODE_414349_length_1398_cov_4.735336	NP_001296278	81.25	5.64e-28	88.6	transcription factor WER-like(LOC105792052)	Gossypium raimondii				GO:0003677~DNA binding,	IPR001005:SANT/Myb domain,IPR009057:Homeodomain-like,IPR017930:Myb domain,			SM00717:SANT,
NODE_1019039_length_1377_cov_4.166304	NP_195268	67.143	3e-25	107	dihydroflavonol 4-reductase-like1(DRL1)	Arabidopsis thaliana	Cell envelope biogenesis, outer membrane / Carbohydrate transport and metabolism,	GO:0009555~pollen development,GO:0010584~pollen exine formation,GO:0048316~seed development,GO:0055114~oxidation-reduction process,GO:0080110~sporopollenin biosynthetic process,	GO:0005634~nucleus,GO:0005783~endoplasmic reticulum,	GO:0005515~protein binding,GO:0016491~oxidoreductase activity,GO:0050662~coenzyme binding,	IPR001509:NAD-dependent epimerase/dehydratase,IPR016040:NAD(P)-binding domain,				Complete proteome,Cytoplasm,Endoplasmic reticulum,NADP,Nucleus,Oxidoreductase,Reference proteome,
NODE_1019039_length_1377_cov_4.166304	NP_195268	80	2.07e-18	87.4	dihydroflavonol 4-reductase-like1(DRL1)	Arabidopsis thaliana	Cell envelope biogenesis, outer membrane / Carbohydrate transport and metabolism,	GO:0009555~pollen development,GO:0010584~pollen exine formation,GO:0048316~seed development,GO:0055114~oxidation-reduction process,GO:0080110~sporopollenin biosynthetic process,	GO:0005634~nucleus,GO:0005783~endoplasmic reticulum,	GO:0005515~protein binding,GO:0016491~oxidoreductase activity,GO:0050662~coenzyme binding,	IPR001509:NAD-dependent epimerase/dehydratase,IPR016040:NAD(P)-binding domain,				Complete proteome,Cytoplasm,Endoplasmic reticulum,NADP,Nucleus,Oxidoreductase,Reference proteome,
NODE_102060_length_1274_cov_4.974097	NP_001242441	33.333	1.73e-08	56.6	uncharacterized LOC100808330(LOC100808330)	Glycine max				GO:0008080~N-acetyltransferase activity,	IPR000182:GNAT domain,IPR016181:Acyl-CoA N-acyltransferase,
NODE_1021059_length_1313_cov_6.181264	NP_001147100	90.541	2e-58	147	dynamin-related protein 1C(LOC100280709)	Zea mays				GO:0003924~GTPase activity,GO:0005525~GTP binding,	IPR000375:Dynamin central domain,IPR001401:Dynamin, GTPase domain,IPR003130:Dynamin GTPase effector,IPR019762:Dynamin, GTPase region, conserved site,IPR020850:GTPase effector domain, GED,IPR022812:Dynamin,IPR027417:P-loop containing nucleoside triphosphate hydrolase,	zma04144:Endocytosis,		SM00053:DYNc,SM00302:GED,	Complete proteome,GTP-binding,Nucleotide-binding,Reference proteome,
NODE_1021059_length_1313_cov_6.181264	NP_001151519	89.189	4.9e-58	146	dynamin-related protein 1C(LOC100285153)	Zea mays				GO:0003924~GTPase activity,GO:0005525~GTP binding,	IPR000375:Dynamin central domain,IPR001401:Dynamin, GTPase domain,IPR003130:Dynamin GTPase effector,IPR019762:Dynamin, GTPase region, conserved site,IPR020850:GTPase effector domain, GED,IPR022812:Dynamin,IPR027417:P-loop containing nucleoside triphosphate hydrolase,	zma04144:Endocytosis,		SM00053:DYNc,SM00302:GED,	Complete proteome,GTP-binding,Nucleotide-binding,Reference proteome,
NODE_1021632_length_1189_cov_5.131203	NP_195370	74.194	1.02e-09	54.7	Chaperone DnaJ-domain superfamily protein(AT4G36520)	Arabidopsis thaliana		GO:0006898~receptor-mediated endocytosis,	GO:0031982~vesicle,		IPR001623:DnaJ domain,				Coiled coil,Complete proteome,Reference proteome,
NODE_107994_length_1267_cov_4.627467	NP_195370	38.053	4.22e-08	57.4	Chaperone DnaJ-domain superfamily protein(AT4G36520)	Arabidopsis thaliana		GO:0006898~receptor-mediated endocytosis,	GO:0031982~vesicle,		IPR001623:DnaJ domain,				Coiled coil,Complete proteome,Reference proteome,
NODE_453047_length_987_cov_5.708207	NP_195370	59.701	6.82e-23	101	Chaperone DnaJ-domain superfamily protein(AT4G36520)	Arabidopsis thaliana		GO:0006898~receptor-mediated endocytosis,	GO:0031982~vesicle,		IPR001623:DnaJ domain,				Coiled coil,Complete proteome,Reference proteome,
NODE_1022572_length_2429_cov_5.270482	NP_001150119	61.818	2.65e-52	188	xylem cysteine proteinase 2(LOC100283748)	Zea mays				GO:0008234~cysteine-type peptidase activity,	IPR000169:Cysteine peptidase, cysteine active site,IPR000668:Peptidase C1A, papain C-terminal,IPR013128:Peptidase C1A, papain,IPR013201:Proteinase inhibitor I29, cathepsin propeptide,IPR025660:Cysteine peptidase, histidine active site,IPR025661:Cysteine peptidase, asparagine active site,			SM00645:Pept_C1,SM00848:SM00848,	Complete proteome,Hydrolase,Protease,Reference proteome,Thiol protease,
NODE_442037_length_1132_cov_4.063604	NP_001150119	39.752	1.09e-16	82.4	xylem cysteine proteinase 2(LOC100283748)	Zea mays				GO:0008234~cysteine-type peptidase activity,	IPR000169:Cysteine peptidase, cysteine active site,IPR000668:Peptidase C1A, papain C-terminal,IPR013128:Peptidase C1A, papain,IPR013201:Proteinase inhibitor I29, cathepsin propeptide,IPR025660:Cysteine peptidase, histidine active site,IPR025661:Cysteine peptidase, asparagine active site,			SM00645:Pept_C1,SM00848:SM00848,	Complete proteome,Hydrolase,Protease,Reference proteome,Thiol protease,
NODE_1024359_length_1747_cov_4.870063	NP_181948	86.957	9.49e-07	50.1	pre-mRNA splicing factor domain-containing protein(AT2G44195)	Arabidopsis thaliana			GO:0005634~nucleus,		IPR019339:CBF1-interacting co-repressor CIR, N-terminal domain,IPR022209:Pre-mRNA splicing factor,			SM01083:SM01083,	Complete proteome,Reference proteome,
NODE_1024388_length_2913_cov_4.728458	NP_001310350	54.406	6.91e-89	299	putative phototropic-responsive NPH3 family protein(LOC103639140)	Zea mays					IPR011333:BTB/POZ fold,IPR027356:NPH3 domain,				Coiled coil,Complete proteome,Reference proteome,
NODE_1025618_length_1421_cov_4.489796	NP_001296948	43.939	9.04e-06	49.7	crossover junction endonuclease MUS81(LOC100216934)	Zea mays						zma03440:Homologous recombination,
NODE_432324_length_2259_cov_5.633909	NP_001296948	75.926	3.7e-18	90.1	crossover junction endonuclease MUS81(LOC100216934)	Zea mays						zma03440:Homologous recombination,
NODE_1026343_length_1218_cov_4.353038	NP_001297258	57.143	1.55e-09	61.2	hypothetical protein(pco086600)	Zea mays			GO:0016021~integral component of membrane,		IPR011042:Six-bladed beta-propeller, TolB-like,				Complete proteome,Membrane,Reference proteome,Signal,Transmembrane,Transmembrane helix,
NODE_1028708_length_1546_cov_3.590556	NP_568698	48.438	7.2e-11	62.4	Lactoylglutathione lyase / glyoxalase I family protein(AT5G48480)	Arabidopsis thaliana			GO:0005737~cytoplasm,GO:0005829~cytosol,						3D-structure,Acetylation,Complete proteome,Reference proteome,	chain:Uncharacterized protein At5g48480,helix,strand,
NODE_1029918_length_1911_cov_4.834118	NP_180379	54.749	3.44e-130	396	Major facilitator superfamily protein(AT2G28120)	Arabidopsis thaliana			GO:0005886~plasma membrane,GO:0016021~integral component of membrane,		IPR010658:Nodulin-like,IPR020846:Major facilitator superfamily domain,				Complete proteome,Membrane,Reference proteome,Transmembrane,Transmembrane helix,
NODE_1029918_length_1911_cov_4.834118	NP_001236811	58.101	1.05e-122	378	nitrate and chloride transporter(LOC732549)	Glycine max		GO:0055085~transmembrane transport,	GO:0016021~integral component of membrane,		IPR010658:Nodulin-like,IPR011701:Major facilitator superfamily,IPR020846:Major facilitator superfamily domain,				Membrane,Transmembrane,Transmembrane helix,
NODE_1031160_length_1511_cov_4.621443	NP_174140	42.396	2e-32	126	hypothetical protein(AT1G28190)	Arabidopsis thaliana			GO:0005634~nucleus,		IPR025322:Protein of unknown function DUF4228,				Complete proteome,Reference proteome,
NODE_1033127_length_2291_cov_5.186818	NP_001106069	68.571	4.41e-34	139	cytochrome P-450 8(cyp8)	Zea mays	Secondary metabolites biosynthesis, transport, and catabolism,		GO:0016021~integral component of membrane,	GO:0004497~monooxygenase activity,GO:0005506~iron ion binding,GO:0016705~oxidoreductase activity, acting on paired donors, with incorporation or reduction of molecular oxygen,GO:0020037~heme binding,	IPR001128:Cytochrome P450,IPR002401:Cytochrome P450, E-class, group I,IPR017972:Cytochrome P450, conserved site,				Complete proteome,Heme,Iron,Membrane,Metal-binding,Monooxygenase,Oxidoreductase,Reference proteome,Transmembrane,Transmembrane helix,	chain:Cytochrome P450 78A1,metal ion-binding site:Iron (heme axial ligand),
NODE_1033_length_2600_cov_5.117308	NP_001314440	55.508	6.39e-76	253	AP2/ERF and B3 domain-containing transcription factor RAV1(LOC107946446)	Gossypium hirsutum		GO:0006351~transcription, DNA-templated,	GO:0005634~nucleus,	GO:0003677~DNA binding,GO:0003700~transcription factor activity, sequence-specific DNA binding,	IPR001471:AP2/ERF domain,IPR003340:B3 DNA binding domain,IPR015300:DNA-binding pseudobarrel domain,IPR016177:DNA-binding, integrase-type,			SM00380:AP2,SM01019:SM01019,	DNA-binding,Nucleus,Transcription,Transcription regulation,
NODE_18087_length_4247_cov_4.640687	NP_001314440	47.34	5.24e-93	306	AP2/ERF and B3 domain-containing transcription factor RAV1(LOC107946446)	Gossypium hirsutum		GO:0006351~transcription, DNA-templated,	GO:0005634~nucleus,	GO:0003677~DNA binding,GO:0003700~transcription factor activity, sequence-specific DNA binding,	IPR001471:AP2/ERF domain,IPR003340:B3 DNA binding domain,IPR015300:DNA-binding pseudobarrel domain,IPR016177:DNA-binding, integrase-type,			SM00380:AP2,SM01019:SM01019,	DNA-binding,Nucleus,Transcription,Transcription regulation,
NODE_1033_length_2600_cov_5.117308	NP_001315729	52.569	1.29e-74	251	AP2/ERF and B3 domain-containing transcription factor RAV1-like(LOC103414249)	Malus domestica		GO:0006351~transcription, DNA-templated,	GO:0005634~nucleus,	GO:0003677~DNA binding,GO:0003700~transcription factor activity, sequence-specific DNA binding,	IPR001471:AP2/ERF domain,IPR003340:B3 DNA binding domain,IPR015300:DNA-binding pseudobarrel domain,IPR016177:DNA-binding, integrase-type,			SM00380:AP2,SM01019:SM01019,	DNA-binding,Nucleus,Transcription,Transcription regulation,
NODE_1034360_length_1094_cov_5.611517	NP_565449	68.75	5.15e-22	90.9	transmembrane protein (DUF872)(AT2G19350)	Arabidopsis thaliana			GO:0016021~integral component of membrane,		IPR008590:Protein of unknown function DUF872, transmembrane,				Complete proteome,Membrane,Reference proteome,Transmembrane,Transmembrane helix,
NODE_1034360_length_1094_cov_5.611517	NP_001237830	69.355	6.26e-20	85.1	uncharacterized LOC100527046(LOC100527046)	Glycine max			GO:0016021~integral component of membrane,		IPR008590:Protein of unknown function DUF872, transmembrane,				Complete proteome,Membrane,Reference proteome,Transmembrane,Transmembrane helix,
NODE_10354_length_2404_cov_5.457571	NP_001238648	88.636	3.07e-18	84	uncharacterized LOC100499961(LOC100499961)	Glycine max		GO:0006474~N-terminal protein amino acid acetylation,	GO:0031248~protein acetyltransferase complex,	GO:0004596~peptide alpha-N-acetyltransferase activity,	IPR000182:GNAT domain,IPR016181:Acyl-CoA N-acyltransferase,				Complete proteome,Reference proteome,
NODE_10354_length_2404_cov_5.457571	NP_001235839	88.636	3.14e-18	84	uncharacterized LOC100527165(LOC100527165)	Glycine max				GO:0008080~N-acetyltransferase activity,	IPR000182:GNAT domain,IPR016181:Acyl-CoA N-acyltransferase,
NODE_1037198_length_1040_cov_4.744231	NP_001132678	68.75	1.21e-16	77.4	uncharacterized LOC100194156(pco085521)	Zea mays					IPR008560:Protein of unknown function DUF842, eukaryotic,
NODE_1037198_length_1040_cov_4.744231	NP_565729	70.833	2.09e-16	76.6	FAM136A-like protein (DUF842)(AT2G31725)	Arabidopsis thaliana					IPR008560:Protein of unknown function DUF842, eukaryotic,				Complete proteome,Reference proteome,
NODE_103797_length_1257_cov_4.585521	NP_195589	92.063	1.7e-42	126	pre-mRNA-processing-splicing factor-like protein(AT4G38780)	Arabidopsis thaliana	RNA processing and modification,	GO:0000398~mRNA splicing, via spliceosome,	GO:0005634~nucleus,GO:0005681~spliceosomal complex,GO:0009506~plasmodesma,	GO:0003729~mRNA binding,GO:0017070~U6 snRNA binding,GO:0030623~U5 snRNA binding,	IPR000555:JAB1/Mov34/MPN/PAD-1,IPR012337:Ribonuclease H-like domain,IPR012591:Pre-mRNA-processing-splicing factor 8,IPR012592:PROCN,IPR012984:PRO, C-terminal,IPR019580:Pre-mRNA-processing-splicing factor 8, U6-snRNA-binding,IPR019581:Pre-mRNA-processing-splicing factor 8, U5-snRNA-binding,IPR019582:RNA recognition motif, spliceosomal PrP8,IPR021983:PRP8 domain IV core,	ath03040:Spliceosome,		SM00232:JAB_MPN,	Complete proteome,mRNA processing,mRNA splicing,Nucleus,Reference proteome,Ribonucleoprotein,RNA-binding,Spliceosome,
NODE_103797_length_1257_cov_4.585521	NP_195589	96.667	1.7e-42	66.6	pre-mRNA-processing-splicing factor-like protein(AT4G38780)	Arabidopsis thaliana	RNA processing and modification,	GO:0000398~mRNA splicing, via spliceosome,	GO:0005634~nucleus,GO:0005681~spliceosomal complex,GO:0009506~plasmodesma,	GO:0003729~mRNA binding,GO:0017070~U6 snRNA binding,GO:0030623~U5 snRNA binding,	IPR000555:JAB1/Mov34/MPN/PAD-1,IPR012337:Ribonuclease H-like domain,IPR012591:Pre-mRNA-processing-splicing factor 8,IPR012592:PROCN,IPR012984:PRO, C-terminal,IPR019580:Pre-mRNA-processing-splicing factor 8, U6-snRNA-binding,IPR019581:Pre-mRNA-processing-splicing factor 8, U5-snRNA-binding,IPR019582:RNA recognition motif, spliceosomal PrP8,IPR021983:PRP8 domain IV core,	ath03040:Spliceosome,		SM00232:JAB_MPN,	Complete proteome,mRNA processing,mRNA splicing,Nucleus,Reference proteome,Ribonucleoprotein,RNA-binding,Spliceosome,
NODE_1143677_length_1053_cov_4.431149	NP_195589	53.03	2.89e-13	67	pre-mRNA-processing-splicing factor-like protein(AT4G38780)	Arabidopsis thaliana	RNA processing and modification,	GO:0000398~mRNA splicing, via spliceosome,	GO:0005634~nucleus,GO:0005681~spliceosomal complex,GO:0009506~plasmodesma,	GO:0003729~mRNA binding,GO:0017070~U6 snRNA binding,GO:0030623~U5 snRNA binding,	IPR000555:JAB1/Mov34/MPN/PAD-1,IPR012337:Ribonuclease H-like domain,IPR012591:Pre-mRNA-processing-splicing factor 8,IPR012592:PROCN,IPR012984:PRO, C-terminal,IPR019580:Pre-mRNA-processing-splicing factor 8, U6-snRNA-binding,IPR019581:Pre-mRNA-processing-splicing factor 8, U5-snRNA-binding,IPR019582:RNA recognition motif, spliceosomal PrP8,IPR021983:PRP8 domain IV core,	ath03040:Spliceosome,		SM00232:JAB_MPN,	Complete proteome,mRNA processing,mRNA splicing,Nucleus,Reference proteome,Ribonucleoprotein,RNA-binding,Spliceosome,
NODE_1143677_length_1053_cov_4.431149	NP_195589	69.231	2.89e-13	24.3	pre-mRNA-processing-splicing factor-like protein(AT4G38780)	Arabidopsis thaliana	RNA processing and modification,	GO:0000398~mRNA splicing, via spliceosome,	GO:0005634~nucleus,GO:0005681~spliceosomal complex,GO:0009506~plasmodesma,	GO:0003729~mRNA binding,GO:0017070~U6 snRNA binding,GO:0030623~U5 snRNA binding,	IPR000555:JAB1/Mov34/MPN/PAD-1,IPR012337:Ribonuclease H-like domain,IPR012591:Pre-mRNA-processing-splicing factor 8,IPR012592:PROCN,IPR012984:PRO, C-terminal,IPR019580:Pre-mRNA-processing-splicing factor 8, U6-snRNA-binding,IPR019581:Pre-mRNA-processing-splicing factor 8, U5-snRNA-binding,IPR019582:RNA recognition motif, spliceosomal PrP8,IPR021983:PRP8 domain IV core,	ath03040:Spliceosome,		SM00232:JAB_MPN,	Complete proteome,mRNA processing,mRNA splicing,Nucleus,Reference proteome,Ribonucleoprotein,RNA-binding,Spliceosome,
NODE_257372_length_1568_cov_4.443878	NP_195589	47	1.45e-09	62.4	pre-mRNA-processing-splicing factor-like protein(AT4G38780)	Arabidopsis thaliana	RNA processing and modification,	GO:0000398~mRNA splicing, via spliceosome,	GO:0005634~nucleus,GO:0005681~spliceosomal complex,GO:0009506~plasmodesma,	GO:0003729~mRNA binding,GO:0017070~U6 snRNA binding,GO:0030623~U5 snRNA binding,	IPR000555:JAB1/Mov34/MPN/PAD-1,IPR012337:Ribonuclease H-like domain,IPR012591:Pre-mRNA-processing-splicing factor 8,IPR012592:PROCN,IPR012984:PRO, C-terminal,IPR019580:Pre-mRNA-processing-splicing factor 8, U6-snRNA-binding,IPR019581:Pre-mRNA-processing-splicing factor 8, U5-snRNA-binding,IPR019582:RNA recognition motif, spliceosomal PrP8,IPR021983:PRP8 domain IV core,	ath03040:Spliceosome,		SM00232:JAB_MPN,	Complete proteome,mRNA processing,mRNA splicing,Nucleus,Reference proteome,Ribonucleoprotein,RNA-binding,Spliceosome,
NODE_103809_length_2977_cov_5.273766	NP_904089	44.762	4.03e-13	75.5	RNA polymerase beta'' chain(rpoC2)	Amborella trichopoda		GO:0006351~transcription, DNA-templated,	GO:0009507~chloroplast,	GO:0003677~DNA binding,GO:0003899~DNA-directed RNA polymerase activity,	IPR007081:RNA polymerase Rpb1, domain 5,IPR007083:RNA polymerase Rpb1, domain 4,IPR012756:DNA-directed RNA polymerase, subunit beta'',	atr00230:Purine metabolism,atr00240:Pyrimidine metabolism,atr01100:Metabolic pathways,atr03020:RNA polymerase,			Chloroplast,Complete proteome,DNA-directed RNA polymerase,Nucleotidyltransferase,Plastid,Reference proteome,Transcription,Transferase,	chain:DNA-directed RNA polymerase subunit beta'',
NODE_609545_length_1274_cov_3.981162	NP_904089	93.75	2.88e-11	67.4	RNA polymerase beta'' chain(rpoC2)	Amborella trichopoda		GO:0006351~transcription, DNA-templated,	GO:0009507~chloroplast,	GO:0003677~DNA binding,GO:0003899~DNA-directed RNA polymerase activity,	IPR007081:RNA polymerase Rpb1, domain 5,IPR007083:RNA polymerase Rpb1, domain 4,IPR012756:DNA-directed RNA polymerase, subunit beta'',	atr00230:Purine metabolism,atr00240:Pyrimidine metabolism,atr01100:Metabolic pathways,atr03020:RNA polymerase,			Chloroplast,Complete proteome,DNA-directed RNA polymerase,Nucleotidyltransferase,Plastid,Reference proteome,Transcription,Transferase,	chain:DNA-directed RNA polymerase subunit beta'',
NODE_1038188_length_1112_cov_4.673561	NP_001141040	61.538	1.36e-33	126	oxygen evolving enhancer protein 3 containing protein(LOC100273120)	Zea mays		GO:0015979~photosynthesis,	GO:0009654~photosystem II oxygen evolving complex,GO:0019898~extrinsic component of membrane,	GO:0005509~calcium ion binding,	IPR008797:Photosystem II PsbQ, oxygen evolving complex,IPR023222:PsbQ-like domain,	zma00195:Photosynthesis,zma01100:Metabolic pathways,			Complete proteome,Reference proteome,
NODE_1038188_length_1112_cov_4.673561	NP_193860	34.94	6.07e-13	68.9	photosystem II subunit QA(PSBQA)	Arabidopsis thaliana		GO:0015979~photosynthesis,	GO:0009507~chloroplast,GO:0009534~chloroplast thylakoid,GO:0009535~chloroplast thylakoid membrane,GO:0009543~chloroplast thylakoid lumen,GO:0009570~chloroplast stroma,GO:0009579~thylakoid,GO:0009654~photosystem II oxygen evolving complex,GO:0019898~extrinsic component of membrane,GO:0030095~chloroplast photosystem II,GO:0031977~thylakoid lumen,	GO:0005509~calcium ion binding,	IPR008797:Photosystem II PsbQ, oxygen evolving complex,IPR023222:PsbQ-like domain,	ath00195:Photosynthesis,ath01100:Metabolic pathways,			Alternative splicing,Chloroplast,Complete proteome,Direct protein sequencing,Membrane,Phosphoprotein,Photosynthesis,Photosystem II,Plastid,Reference proteome,Thylakoid,Transit peptide,	chain:Oxygen-evolving enhancer protein 3-1, chloroplastic,splice variant,transit peptide:Chloroplast,transit peptide:Thylakoid,
NODE_104001_length_5119_cov_4.515531	NP_200780	63.087	6.45e-40	147	heat shock protein 18.2(HSP18.2)	Arabidopsis thaliana	Posttranslational modification, protein turnover, chaperones,	GO:0009408~response to heat,GO:0009644~response to high light intensity,GO:0010286~heat acclimation,GO:0042542~response to hydrogen peroxide,	GO:0005737~cytoplasm,	GO:0005515~protein binding,	IPR002068:Alpha crystallin/Hsp20 domain,IPR008978:HSP20-like chaperone,	ath04141:Protein processing in endoplasmic reticulum,			Complete proteome,Cytoplasm,Reference proteome,Stress response,	chain:18.1 kDa class I heat shock protein,sequence conflict,
NODE_104001_length_5119_cov_4.515531	NP_001238680	59.732	3.66e-38	141	uncharacterized LOC100500475(LOC100500475)	Glycine max					IPR002068:Alpha crystallin/Hsp20 domain,IPR008978:HSP20-like chaperone,	gmx04141:Protein processing in endoplasmic reticulum,			Complete proteome,Reference proteome,
NODE_104001_length_5119_cov_4.515531	NP_175759	61.074	5.6e-38	141	HSP20-like chaperones superfamily protein(AT1G53540)	Arabidopsis thaliana		GO:0009408~response to heat,	GO:0005737~cytoplasm,		IPR002068:Alpha crystallin/Hsp20 domain,IPR008978:HSP20-like chaperone,	ath04141:Protein processing in endoplasmic reticulum,			Complete proteome,Cytoplasm,Reference proteome,Stress response,	chain:17.6 kDa class I heat shock protein 3,
NODE_10406_length_1342_cov_4.190760	NP_001289238	77.551	1.39e-79	255	uncharacterized LOC103945360(LOC103945360)	Pyrus x bretschneideri		GO:0008152~metabolic process,		GO:0016757~transferase activity, transferring glycosyl groups,	IPR002201:Glycosyl transferase, family 9,
NODE_1044798_length_1351_cov_5.055514	NP_171809	38.406	1.45e-24	108	Pentatricopeptide repeat (PPR) superfamily protein(AT1G03100)	Arabidopsis thaliana			GO:0005739~mitochondrion,		IPR002885:Pentatricopeptide repeat,IPR011990:Tetratricopeptide-like helical,				Complete proteome,Mitochondrion,Reference proteome,Repeat,Transit peptide,	chain:Pentatricopeptide repeat-containing protein At1g03100, mitochondrial,repeat:PPR 1,repeat:PPR 10,repeat:PPR 11,repeat:PPR 2,repeat:PPR 3,repeat:PPR 4,repeat:PPR 5,repeat:PPR 6,repeat:PPR 7,repeat:PPR 8,repeat:PPR 9,transit peptide:Mitochondrion,
NODE_1044798_length_1351_cov_5.055514	NP_177089	32.414	3.12e-15	79.7	Pentatricopeptide repeat (PPR) superfamily protein(AT1G69290)	Arabidopsis thaliana			GO:0005739~mitochondrion,		IPR002885:Pentatricopeptide repeat,				Complete proteome,Reference proteome,Repeat,	chain:Pentatricopeptide repeat-containing protein At1g69290,repeat:PPR 1,repeat:PPR 10,repeat:PPR 11,repeat:PPR 2,repeat:PPR 3,repeat:PPR 4,repeat:PPR 5,repeat:PPR 6,repeat:PPR 7,repeat:PPR 8,repeat:PPR 9,
NODE_1050251_length_1594_cov_5.052698	NP_001302870	53.333	6.95e-15	79.3	cellulose synthase A catalytic subunit 8 [UDP-forming](LOC106415724)	Brassica napus		GO:0030244~cellulose biosynthetic process,GO:0071555~cell wall organization,	GO:0005886~plasma membrane,GO:0016021~integral component of membrane,	GO:0016760~cellulose synthase (UDP-forming) activity,GO:0046872~metal ion binding,	IPR005150:Cellulose synthase,IPR013083:Zinc finger, RING/FYVE/PHD-type,				Cell membrane,Cell wall biogenesis/degradation,Cellulose biosynthesis,Glycosyltransferase,Membrane,Metal-binding,Transferase,Transmembrane,Transmembrane helix,Zinc,Zinc-finger,
NODE_1054242_length_1456_cov_4.551511	NP_001236871	81.818	3.95e-25	106	NAC domain protein NAC2(NAC2)	Glycine max		GO:0006351~transcription, DNA-templated,GO:0006355~regulation of transcription, DNA-templated,	GO:0005634~nucleus,	GO:0003677~DNA binding,	IPR003441:No apical meristem (NAM) protein,				DNA-binding,Nucleus,Transcription,Transcription regulation,
NODE_1054242_length_1456_cov_4.551511	NP_001240958	80	1.61e-24	104	NAC domain-containing protein 2-like(NAC8)	Glycine max		GO:0006351~transcription, DNA-templated,GO:0006355~regulation of transcription, DNA-templated,	GO:0005634~nucleus,	GO:0003677~DNA binding,	IPR003441:No apical meristem (NAM) protein,				Complete proteome,DNA-binding,Nucleus,Reference proteome,Transcription,Transcription regulation,
NODE_946381_length_1102_cov_4.397459	NP_001240958	53.704	2.12e-12	68.6	NAC domain-containing protein 2-like(NAC8)	Glycine max		GO:0006351~transcription, DNA-templated,GO:0006355~regulation of transcription, DNA-templated,	GO:0005634~nucleus,	GO:0003677~DNA binding,	IPR003441:No apical meristem (NAM) protein,				Complete proteome,DNA-binding,Nucleus,Reference proteome,Transcription,Transcription regulation,
NODE_1055191_length_1173_cov_4.512362	NP_187889	59.341	2.04e-20	87.8	SAUR-like auxin-responsive protein family(AT3G12830)	Arabidopsis thaliana		GO:0007275~multicellular organism development,GO:0009733~response to auxin,GO:0009734~auxin-activated signaling pathway,GO:0040008~regulation of growth,	GO:0005737~cytoplasm,		IPR003676:Auxin responsive SAUR protein,	ath04075:Plant hormone signal transduction,			Auxin signaling pathway,Complete proteome,Cytoplasm,Developmental protein,Growth regulation,Reference proteome,
NODE_1236020_length_1506_cov_3.895086	NP_187889	67.647	4.66e-24	99	SAUR-like auxin-responsive protein family(AT3G12830)	Arabidopsis thaliana		GO:0007275~multicellular organism development,GO:0009733~response to auxin,GO:0009734~auxin-activated signaling pathway,GO:0040008~regulation of growth,	GO:0005737~cytoplasm,		IPR003676:Auxin responsive SAUR protein,	ath04075:Plant hormone signal transduction,			Auxin signaling pathway,Complete proteome,Cytoplasm,Developmental protein,Growth regulation,Reference proteome,
NODE_1055191_length_1173_cov_4.512362	NP_173100	76.596	1.23e-16	77.8	SAUR-like auxin-responsive protein family(AT1G16510)	Arabidopsis thaliana		GO:0009733~response to auxin,GO:0009734~auxin-activated signaling pathway,GO:0009958~positive gravitropism,GO:0016049~cell growth,GO:0040008~regulation of growth,GO:0060918~auxin transport,GO:0090057~root radial pattern formation,	GO:0005737~cytoplasm,		IPR003676:Auxin responsive SAUR protein,	ath04075:Plant hormone signal transduction,			Auxin signaling pathway,Complete proteome,Cytoplasm,Developmental protein,Growth regulation,Reference proteome,
NODE_1236020_length_1506_cov_3.895086	NP_173100	60.274	1.08e-21	92.8	SAUR-like auxin-responsive protein family(AT1G16510)	Arabidopsis thaliana		GO:0009733~response to auxin,GO:0009734~auxin-activated signaling pathway,GO:0009958~positive gravitropism,GO:0016049~cell growth,GO:0040008~regulation of growth,GO:0060918~auxin transport,GO:0090057~root radial pattern formation,	GO:0005737~cytoplasm,		IPR003676:Auxin responsive SAUR protein,	ath04075:Plant hormone signal transduction,			Auxin signaling pathway,Complete proteome,Cytoplasm,Developmental protein,Growth regulation,Reference proteome,
NODE_1056818_length_1430_cov_6.063636	NP_565298	52.294	1.9e-33	133	Eukaryotic aspartyl protease family protein(AT2G03200)	Arabidopsis thaliana		GO:0006508~proteolysis,GO:0030163~protein catabolic process,	GO:0005576~extracellular region,	GO:0004190~aspartic-type endopeptidase activity,	IPR001461:Peptidase A1,IPR021109:Aspartic peptidase,				Complete proteome,Hydrolase,Protease,Reference proteome,Signal,
NODE_87855_length_1774_cov_4.972942	NP_565298	34.097	7.5e-43	161	Eukaryotic aspartyl protease family protein(AT2G03200)	Arabidopsis thaliana		GO:0006508~proteolysis,GO:0030163~protein catabolic process,	GO:0005576~extracellular region,	GO:0004190~aspartic-type endopeptidase activity,	IPR001461:Peptidase A1,IPR021109:Aspartic peptidase,				Complete proteome,Hydrolase,Protease,Reference proteome,Signal,
NODE_1056818_length_1430_cov_6.063636	NP_001150678	46.903	9.47e-23	102	uncharacterized LOC100274575(LOC100274575)	Zea mays				GO:0004190~aspartic-type endopeptidase activity,	IPR001461:Peptidase A1,IPR001969:Peptidase aspartic, active site,IPR021109:Aspartic peptidase,				Aspartyl protease,Complete proteome,Hydrolase,Protease,Reference proteome,Signal,
NODE_346840_length_981_cov_5.859327	NP_001150678	47.917	8.64e-06	48.5	uncharacterized LOC100274575(LOC100274575)	Zea mays				GO:0004190~aspartic-type endopeptidase activity,	IPR001461:Peptidase A1,IPR001969:Peptidase aspartic, active site,IPR021109:Aspartic peptidase,				Aspartyl protease,Complete proteome,Hydrolase,Protease,Reference proteome,Signal,
NODE_8463_length_1492_cov_4.197721	NP_001150678	34.123	1.85e-24	107	uncharacterized LOC100274575(LOC100274575)	Zea mays				GO:0004190~aspartic-type endopeptidase activity,	IPR001461:Peptidase A1,IPR001969:Peptidase aspartic, active site,IPR021109:Aspartic peptidase,				Aspartyl protease,Complete proteome,Hydrolase,Protease,Reference proteome,Signal,
NODE_105869_length_3255_cov_4.750230	NP_001241429	48.201	1.09e-28	119	uncharacterized LOC100807129(LOC100807129)	Glycine max									Complete proteome,Reference proteome,
NODE_1059092_length_2275_cov_4.622417	NP_001314158	35.838	1.3e-18	88.6	auxin-responsive protein IAA11-like(LOC107923964)	Gossypium hirsutum		GO:0006351~transcription, DNA-templated,GO:0006355~regulation of transcription, DNA-templated,GO:0009734~auxin-activated signaling pathway,	GO:0005634~nucleus,		IPR000270:Phox/Bem1p,IPR003311:AUX/IAA protein,				Auxin signaling pathway,Nucleus,Repressor,Transcription,Transcription regulation,
NODE_106018_length_1124_cov_4.002669	NP_563840	62.222	2e-11	67	rhodanese-like domain protein(AT1G09280)	Arabidopsis thaliana			GO:0005634~nucleus,		IPR001763:Rhodanese-like domain,IPR005645:Serine hydrolase FSH,IPR022111:Protein of unknown function DUF3650,			SM00450:RHOD,	Complete proteome,Reference proteome,
NODE_106107_length_3322_cov_4.750151	NP_001147970	61.832	8.49e-31	130	glycoside transferase, six-hairpin, subgroup(LOC100281579)	Zea mays		GO:0030245~cellulose catabolic process,	GO:0016021~integral component of membrane,	GO:0008810~cellulase activity,GO:0016740~transferase activity,	IPR001701:Glycoside hydrolase, family 9,IPR008928:Six-hairpin glycosidase-like,IPR012341:Six-hairpin glycosidase,IPR018221:Glycoside hydrolase, family 9, active site,				Carbohydrate metabolism,Cellulose degradation,Glycosidase,Hydrolase,Membrane,Polysaccharide degradation,Transferase,Transmembrane,Transmembrane helix,
NODE_106107_length_3322_cov_4.750151	NP_001288520	53.435	1.93e-25	114	endoglucanase 12-like(LOC103641803)	Zea mays		GO:0030245~cellulose catabolic process,	GO:0016021~integral component of membrane,	GO:0008810~cellulase activity,	IPR001701:Glycoside hydrolase, family 9,IPR008928:Six-hairpin glycosidase-like,IPR012341:Six-hairpin glycosidase,IPR018221:Glycoside hydrolase, family 9, active site,				Carbohydrate metabolism,Cellulose degradation,Complete proteome,Glycosidase,Hydrolase,Membrane,Polysaccharide degradation,Reference proteome,Transmembrane,Transmembrane helix,
NODE_1061368_length_1443_cov_4.370755	NP_188410	56.818	1.82e-08	58.2	Molecular chaperone Hsp40/DnaJ family protein(AT3G17830)	Arabidopsis thaliana		GO:0006457~protein folding,GO:0009408~response to heat,	GO:0009507~chloroplast,GO:0016021~integral component of membrane,	GO:0005524~ATP binding,GO:0031072~heat shock protein binding,GO:0051082~unfolded protein binding,	IPR001305:Heat shock protein DnaJ, cysteine-rich domain,IPR001623:DnaJ domain,IPR002939:Chaperone DnaJ, C-terminal,IPR008971:HSP40/DnaJ peptide-binding,IPR012724:Chaperone DnaJ,IPR018253:DnaJ domain, conserved site,			SM00271:DnaJ,	Complete proteome,Membrane,Reference proteome,Transmembrane,Transmembrane helix,
NODE_1061368_length_1443_cov_4.370755	NP_001130721	47.727	9.45e-07	52.8	uncharacterized LOC100191825(LOC100191825)	Zea mays		GO:0006457~protein folding,GO:0009408~response to heat,		GO:0005524~ATP binding,	IPR001305:Heat shock protein DnaJ, cysteine-rich domain,IPR001623:DnaJ domain,IPR002939:Chaperone DnaJ, C-terminal,IPR008971:HSP40/DnaJ peptide-binding,IPR012724:Chaperone DnaJ,IPR018253:DnaJ domain, conserved site,			SM00271:DnaJ,	Complete proteome,Reference proteome,
NODE_106180_length_1038_cov_4.497110	NP_199598	74.359	5.33e-12	65.5	cobalt ion-binding protein(RAD52-2)	Arabidopsis thaliana		GO:0000724~double-strand break repair via homologous recombination,	GO:0009507~chloroplast,						Chloroplast,Complete proteome,DNA damage,DNA recombination,DNA repair,DNA-binding,Plastid,Reference proteome,Transit peptide,
NODE_1064088_length_1224_cov_4.937091	NP_001274928	65.909	5.52e-10	62.4	uncharacterized LOC102577718(LOC102577718)	Solanum tuberosum		GO:0006412~translation,	GO:0005840~ribosome,	GO:0003735~structural constituent of ribosome,	IPR002136:Ribosomal protein L4/L1e,IPR013000:Ribosomal protein L4/L1e, eukaryotic/archaeal, conserved site,IPR023574:Ribosomal protein L4 domain,IPR025755:60S ribosomal protein L4, C-terminal domain,	sot03010:Ribosome,			Coiled coil,
NODE_106524_length_979_cov_4.748723	NP_001234288	56.338	6.7e-42	156	SBT2 protein(SBT2)	Solanum lycopersicum			GO:0005618~cell wall,	GO:0004252~serine-type endopeptidase activity,	IPR000209:Peptidase S8/S53 domain,IPR003137:Protease-associated domain, PA,IPR010259:Proteinase inhibitor I9,IPR015500:Peptidase S8, subtilisin-related,IPR023828:Peptidase S8, subtilisin, Ser-active site,				Complete proteome,Hydrolase,Protease,Reference proteome,Signal,
NODE_1067781_length_1319_cov_4.394996	NP_001307979	50.667	1.35e-37	146	clade XIV lectin receptor kinase(LOC104648543)	Solanum lycopersicum			GO:0016021~integral component of membrane,	GO:0004672~protein kinase activity,GO:0005524~ATP binding,GO:0030246~carbohydrate binding,	IPR000719:Protein kinase, catalytic domain,IPR001220:Legume lectin domain,IPR008271:Serine/threonine-protein kinase, active site,IPR013320:Concanavalin A-like lectin/glucanase, subgroup,IPR017441:Protein kinase, ATP binding site,IPR019825:Legume lectin, beta chain, Mn/Ca-binding site,			SM00220:S_TKc,	Complete proteome,Kinase,Lectin,Membrane,Receptor,Reference proteome,Signal,Transferase,Transmembrane,Transmembrane helix,
NODE_106864_length_2169_cov_4.881512	NP_001147988	53.488	2.34e-07	55.8	transposon protein(LOC100281597)	Zea mays				GO:0003677~DNA binding,	IPR003656:Zinc finger, BED-type predicted,IPR008906:HAT dimerisation,IPR012337:Ribonuclease H-like domain,IPR025525:Domain of unknown function DUF4413,			SM00614:ZnF_BED,
NODE_191112_length_1462_cov_5.363201	NP_001147988	47.5	2.69e-15	73.2	transposon protein(LOC100281597)	Zea mays				GO:0003677~DNA binding,	IPR003656:Zinc finger, BED-type predicted,IPR008906:HAT dimerisation,IPR012337:Ribonuclease H-like domain,IPR025525:Domain of unknown function DUF4413,			SM00614:ZnF_BED,
NODE_207932_length_1057_cov_5.498581	NP_001147988	40	4.81e-18	87	transposon protein(LOC100281597)	Zea mays				GO:0003677~DNA binding,	IPR003656:Zinc finger, BED-type predicted,IPR008906:HAT dimerisation,IPR012337:Ribonuclease H-like domain,IPR025525:Domain of unknown function DUF4413,			SM00614:ZnF_BED,
NODE_292255_length_1629_cov_4.659914	NP_001147988	30.348	1.95e-20	85.1	transposon protein(LOC100281597)	Zea mays				GO:0003677~DNA binding,	IPR003656:Zinc finger, BED-type predicted,IPR008906:HAT dimerisation,IPR012337:Ribonuclease H-like domain,IPR025525:Domain of unknown function DUF4413,			SM00614:ZnF_BED,
NODE_58585_length_2730_cov_4.762271	NP_001147988	40.491	1.56e-47	101	transposon protein(LOC100281597)	Zea mays				GO:0003677~DNA binding,	IPR003656:Zinc finger, BED-type predicted,IPR008906:HAT dimerisation,IPR012337:Ribonuclease H-like domain,IPR025525:Domain of unknown function DUF4413,			SM00614:ZnF_BED,
NODE_626718_length_1472_cov_5.767663	NP_001147988	41.379	5.86e-11	66.6	transposon protein(LOC100281597)	Zea mays				GO:0003677~DNA binding,	IPR003656:Zinc finger, BED-type predicted,IPR008906:HAT dimerisation,IPR012337:Ribonuclease H-like domain,IPR025525:Domain of unknown function DUF4413,			SM00614:ZnF_BED,
NODE_1068701_length_1751_cov_4.560251	NP_001237498	80.328	5.93e-28	109	uncharacterized LOC100306354(LOC100306354)	Glycine max					IPR003854:Gibberellin regulated protein,				Signal,
NODE_1070115_length_1657_cov_4.809294	NP_001275220	61.111	9.33e-08	56.6	isoamylase isoform 3(LOC102577824)	Solanum tuberosum		GO:0005975~carbohydrate metabolic process,		GO:0004553~hydrolase activity, hydrolyzing O-glycosyl compounds,	IPR004193:Glycoside hydrolase, family 13, N-terminal,IPR006047:Glycosyl hydrolase, family 13, catalytic domain,IPR013780:Glycosyl hydrolase, family 13, all-beta,IPR013781:Glycoside hydrolase, catalytic domain,IPR013783:Immunoglobulin-like fold,IPR014756:Immunoglobulin E-set,IPR015902:Glycoside hydrolase, family 13,IPR017853:Glycoside hydrolase, superfamily,			SM00642:Aamy,
NODE_1070115_length_1657_cov_4.809294	NP_001275220	69.444	3.67e-07	54.7	isoamylase isoform 3(LOC102577824)	Solanum tuberosum		GO:0005975~carbohydrate metabolic process,		GO:0004553~hydrolase activity, hydrolyzing O-glycosyl compounds,	IPR004193:Glycoside hydrolase, family 13, N-terminal,IPR006047:Glycosyl hydrolase, family 13, catalytic domain,IPR013780:Glycosyl hydrolase, family 13, all-beta,IPR013781:Glycoside hydrolase, catalytic domain,IPR013783:Immunoglobulin-like fold,IPR014756:Immunoglobulin E-set,IPR015902:Glycoside hydrolase, family 13,IPR017853:Glycoside hydrolase, superfamily,			SM00642:Aamy,
NODE_51831_length_1729_cov_4.868710	NP_001275220	52.632	2.73e-21	99.8	isoamylase isoform 3(LOC102577824)	Solanum tuberosum		GO:0005975~carbohydrate metabolic process,		GO:0004553~hydrolase activity, hydrolyzing O-glycosyl compounds,	IPR004193:Glycoside hydrolase, family 13, N-terminal,IPR006047:Glycosyl hydrolase, family 13, catalytic domain,IPR013780:Glycosyl hydrolase, family 13, all-beta,IPR013781:Glycoside hydrolase, catalytic domain,IPR013783:Immunoglobulin-like fold,IPR014756:Immunoglobulin E-set,IPR015902:Glycoside hydrolase, family 13,IPR017853:Glycoside hydrolase, superfamily,			SM00642:Aamy,
NODE_674732_length_1669_cov_5.083882	NP_001275220	74.359	6.16e-11	66.6	isoamylase isoform 3(LOC102577824)	Solanum tuberosum		GO:0005975~carbohydrate metabolic process,		GO:0004553~hydrolase activity, hydrolyzing O-glycosyl compounds,	IPR004193:Glycoside hydrolase, family 13, N-terminal,IPR006047:Glycosyl hydrolase, family 13, catalytic domain,IPR013780:Glycosyl hydrolase, family 13, all-beta,IPR013781:Glycoside hydrolase, catalytic domain,IPR013783:Immunoglobulin-like fold,IPR014756:Immunoglobulin E-set,IPR015902:Glycoside hydrolase, family 13,IPR017853:Glycoside hydrolase, superfamily,			SM00642:Aamy,
NODE_1070115_length_1657_cov_4.809294	NP_001105198	60.526	1.05e-07	56.2	isoamylase-type starch debranching enzyme ISO3(iso3)	Zea mays		GO:0005975~carbohydrate metabolic process,		GO:0003824~catalytic activity,GO:0004553~hydrolase activity, hydrolyzing O-glycosyl compounds,	IPR004193:Glycoside hydrolase, family 13, N-terminal,IPR006047:Glycosyl hydrolase, family 13, catalytic domain,IPR013780:Glycosyl hydrolase, family 13, all-beta,IPR013781:Glycoside hydrolase, catalytic domain,IPR013783:Immunoglobulin-like fold,IPR014756:Immunoglobulin E-set,IPR015902:Glycoside hydrolase, family 13,IPR017853:Glycoside hydrolase, superfamily,			SM00642:Aamy,	Complete proteome,Reference proteome,
NODE_51831_length_1729_cov_4.868710	NP_001105198	53.684	2.56e-21	99.8	isoamylase-type starch debranching enzyme ISO3(iso3)	Zea mays		GO:0005975~carbohydrate metabolic process,		GO:0003824~catalytic activity,GO:0004553~hydrolase activity, hydrolyzing O-glycosyl compounds,	IPR004193:Glycoside hydrolase, family 13, N-terminal,IPR006047:Glycosyl hydrolase, family 13, catalytic domain,IPR013780:Glycosyl hydrolase, family 13, all-beta,IPR013781:Glycoside hydrolase, catalytic domain,IPR013783:Immunoglobulin-like fold,IPR014756:Immunoglobulin E-set,IPR015902:Glycoside hydrolase, family 13,IPR017853:Glycoside hydrolase, superfamily,			SM00642:Aamy,	Complete proteome,Reference proteome,
NODE_674732_length_1669_cov_5.083882	NP_001105198	71.053	1.88e-10	65.1	isoamylase-type starch debranching enzyme ISO3(iso3)	Zea mays		GO:0005975~carbohydrate metabolic process,		GO:0003824~catalytic activity,GO:0004553~hydrolase activity, hydrolyzing O-glycosyl compounds,	IPR004193:Glycoside hydrolase, family 13, N-terminal,IPR006047:Glycosyl hydrolase, family 13, catalytic domain,IPR013780:Glycosyl hydrolase, family 13, all-beta,IPR013781:Glycoside hydrolase, catalytic domain,IPR013783:Immunoglobulin-like fold,IPR014756:Immunoglobulin E-set,IPR015902:Glycoside hydrolase, family 13,IPR017853:Glycoside hydrolase, superfamily,			SM00642:Aamy,	Complete proteome,Reference proteome,
NODE_107049_length_2003_cov_4.680978	NP_001319900	40.909	6.98e-10	61.6	Ankyrin repeat family protein(AT4G11000)	Arabidopsis thaliana			GO:0016021~integral component of membrane,
NODE_1072718_length_1135_cov_4.416740	NP_565338	71.622	2.46e-27	115	RNA helicase, ATP-dependent, SK12/DOB1 protein(HEN2)	Arabidopsis thaliana	DNA replication, recombination, and repair,	GO:0006397~mRNA processing,GO:0006401~RNA catabolic process,GO:0010093~specification of floral organ identity,GO:0016070~RNA metabolic process,GO:0060149~negative regulation of posttranscriptional gene silencing,GO:0070478~nuclear-transcribed mRNA catabolic process, 3'-5' exonucleolytic nonsense-mediated decay,	GO:0005634~nucleus,GO:0005654~nucleoplasm,GO:0005829~cytosol,GO:0016607~nuclear speck,GO:0055087~Ski complex,	GO:0003723~RNA binding,GO:0003724~RNA helicase activity,GO:0004004~ATP-dependent RNA helicase activity,GO:0005524~ATP binding,GO:0008026~ATP-dependent helicase activity,	IPR001650:Helicase, C-terminal,IPR011545:DNA/RNA helicase, DEAD/DEAH box type, N-terminal,IPR012961:DSH, C-terminal,IPR014001:Helicase, superfamily 1/2, ATP-binding domain,IPR016438:RNA helicase, ATP-dependent, SK12/DOB1,IPR025696:rRNA-processing arch domain,IPR027417:P-loop containing nucleoside triphosphate hydrolase,	ath03018:RNA degradation,	PIRSF005198:antiviral helicase, SKI2 type,	SM00487:DEXDc,SM00490:HELICc,SM01142:SM01142,	Acetylation,ATP-binding,Complete proteome,Developmental protein,Flowering,Helicase,Hydrolase,mRNA processing,Nucleotide-binding,Nucleus,Reference proteome,RNA-binding,
NODE_1072718_length_1135_cov_4.416740	NP_001325879	42.727	3.34e-17	85.1	RNA helicase, ATP-dependent, SK12/DOB1 protein(AT3G46960)	Arabidopsis thaliana	DNA replication, recombination, and repair,	GO:0006351~transcription, DNA-templated,GO:0006355~regulation of transcription, DNA-templated,GO:0006813~potassium ion transport,GO:0016441~posttranscriptional gene silencing,GO:0035864~response to potassium ion,GO:0070478~nuclear-transcribed mRNA catabolic process, 3'-5' exonucleolytic nonsense-mediated decay,GO:1904278~positive regulation of wax biosynthetic process,	GO:0005634~nucleus,GO:0005737~cytoplasm,GO:0005773~vacuole,GO:0055087~Ski complex,	GO:0003723~RNA binding,GO:0003724~RNA helicase activity,GO:0004004~ATP-dependent RNA helicase activity,GO:0005524~ATP binding,GO:0008026~ATP-dependent helicase activity,	IPR001650:Helicase, C-terminal,IPR011545:DNA/RNA helicase, DEAD/DEAH box type, N-terminal,IPR012961:DSH, C-terminal,IPR014001:Helicase, superfamily 1/2, ATP-binding domain,IPR016438:RNA helicase, ATP-dependent, SK12/DOB1,IPR025696:rRNA-processing arch domain,IPR027417:P-loop containing nucleoside triphosphate hydrolase,	ath03018:RNA degradation,	PIRSF005198:antiviral helicase, SKI2 type,	SM00487:DEXDc,SM00490:HELICc,SM01142:SM01142,	ATP-binding,Complete proteome,Cytoplasm,Helicase,Hydrolase,Nucleotide-binding,Reference proteome,RNA-binding,Transcription,Transcription regulation,
NODE_107589_length_1741_cov_5.350373	NP_194460	67.568	4.29e-24	108	S-locus lectin protein kinase family protein(AT4G27300)	Arabidopsis thaliana		GO:0006468~protein phosphorylation,GO:0006952~defense response,GO:0048544~recognition of pollen,	GO:0005886~plasma membrane,GO:0009506~plasmodesma,GO:0016021~integral component of membrane,	GO:0004674~protein serine/threonine kinase activity,GO:0005516~calmodulin binding,GO:0005524~ATP binding,GO:0016301~kinase activity,GO:0030246~carbohydrate binding,GO:0031625~ubiquitin protein ligase binding,	IPR000719:Protein kinase, catalytic domain,IPR000858:S-locus glycoprotein,IPR001245:Serine-threonine/tyrosine-protein kinase catalytic domain,IPR001480:Bulb-type lectin domain,IPR003609:Apple-like,IPR008271:Serine/threonine-protein kinase, active site,IPR011009:Protein kinase-like domain,IPR013320:Concanavalin A-like lectin/glucanase, subgroup,IPR021820:S-locus receptor kinase, C-terminal,IPR0241…		PIRSF000641:receptor kinase, S-locus SRK type,	SM00108:B_lectin,SM00220:S_TKc,SM00473:PAN_AP,	ATP-binding,Cell membrane,Complete proteome,Disulfide bond,EGF-like domain,Glycoprotein,Kinase,Lectin,Membrane,Nucleotide-binding,Phosphoprotein,Receptor,Reference proteome,Serine/threonine-protein kinase,Signal,Transferase,Transmembrane,Transmembrane helix,
NODE_642640_length_2380_cov_4.702101	NP_194460	52.941	1.67e-08	59.7	S-locus lectin protein kinase family protein(AT4G27300)	Arabidopsis thaliana		GO:0006468~protein phosphorylation,GO:0006952~defense response,GO:0048544~recognition of pollen,	GO:0005886~plasma membrane,GO:0009506~plasmodesma,GO:0016021~integral component of membrane,	GO:0004674~protein serine/threonine kinase activity,GO:0005516~calmodulin binding,GO:0005524~ATP binding,GO:0016301~kinase activity,GO:0030246~carbohydrate binding,GO:0031625~ubiquitin protein ligase binding,	IPR000719:Protein kinase, catalytic domain,IPR000858:S-locus glycoprotein,IPR001245:Serine-threonine/tyrosine-protein kinase catalytic domain,IPR001480:Bulb-type lectin domain,IPR003609:Apple-like,IPR008271:Serine/threonine-protein kinase, active site,IPR011009:Protein kinase-like domain,IPR013320:Concanavalin A-like lectin/glucanase, subgroup,IPR021820:S-locus receptor kinase, C-terminal,IPR0241…		PIRSF000641:receptor kinase, S-locus SRK type,	SM00108:B_lectin,SM00220:S_TKc,SM00473:PAN_AP,	ATP-binding,Cell membrane,Complete proteome,Disulfide bond,EGF-like domain,Glycoprotein,Kinase,Lectin,Membrane,Nucleotide-binding,Phosphoprotein,Receptor,Reference proteome,Serine/threonine-protein kinase,Signal,Transferase,Transmembrane,Transmembrane helix,
NODE_10770_length_1805_cov_5.135180	NP_194958	72.093	7.65e-14	74.3	ascorbate peroxidase 6(APX6)	Arabidopsis thaliana		GO:0000302~response to reactive oxygen species,GO:0006979~response to oxidative stress,GO:0009845~seed germination,GO:0010431~seed maturation,GO:0034599~cellular response to oxidative stress,GO:0042744~hydrogen peroxide catabolic process,GO:0055114~oxidation-reduction process,	GO:0005576~extracellular region,GO:0005829~cytosol,	GO:0004130~cytochrome-c peroxidase activity,GO:0004601~peroxidase activity,GO:0016688~L-ascorbate peroxidase activity,GO:0020037~heme binding,GO:0046872~metal ion binding,	IPR002016:Haem peroxidase, plant/fungal/bacterial,IPR002207:Plant ascorbate peroxidase,IPR010255:Haem peroxidase,IPR019793:Peroxidases heam-ligand binding site,IPR019794:Peroxidase, active site,	ath00053:Ascorbate and aldarate metabolism,ath00480:Glutathione metabolism,			Complete proteome,Heme,Hydrogen peroxide,Iron,Metal-binding,Oxidoreductase,Peroxidase,Reference proteome,	active site:Proton acceptor,chain:Putative L-ascorbate peroxidase 6,metal ion-binding site:Iron (heme axial ligand),site:Transition state stabilizer,
NODE_10770_length_1805_cov_5.135180	NP_194958	57.576	7.56e-12	52.4	ascorbate peroxidase 6(APX6)	Arabidopsis thaliana		GO:0000302~response to reactive oxygen species,GO:0006979~response to oxidative stress,GO:0009845~seed germination,GO:0010431~seed maturation,GO:0034599~cellular response to oxidative stress,GO:0042744~hydrogen peroxide catabolic process,GO:0055114~oxidation-reduction process,	GO:0005576~extracellular region,GO:0005829~cytosol,	GO:0004130~cytochrome-c peroxidase activity,GO:0004601~peroxidase activity,GO:0016688~L-ascorbate peroxidase activity,GO:0020037~heme binding,GO:0046872~metal ion binding,	IPR002016:Haem peroxidase, plant/fungal/bacterial,IPR002207:Plant ascorbate peroxidase,IPR010255:Haem peroxidase,IPR019793:Peroxidases heam-ligand binding site,IPR019794:Peroxidase, active site,	ath00053:Ascorbate and aldarate metabolism,ath00480:Glutathione metabolism,			Complete proteome,Heme,Hydrogen peroxide,Iron,Metal-binding,Oxidoreductase,Peroxidase,Reference proteome,	active site:Proton acceptor,chain:Putative L-ascorbate peroxidase 6,metal ion-binding site:Iron (heme axial ligand),site:Transition state stabilizer,
NODE_1079177_length_956_cov_4.487448	NP_001314439	79.167	1.67e-21	93.2	allene oxide cyclase 4, chloroplastic(LOC107946443)	Gossypium hirsutum			GO:0009507~chloroplast,	GO:0016853~isomerase activity,	IPR009410:Allene oxide cyclase,
NODE_108118_length_1468_cov_5.310627	NP_001234641	67.347	6.17e-16	82	MLH1 protein(MLH1)	Solanum lycopersicum		GO:0006298~mismatch repair,		GO:0005524~ATP binding,GO:0030983~mismatched DNA binding,	IPR002099:DNA mismatch repair protein,IPR003594:Histidine kinase-like ATPase, ATP-binding domain,IPR013507:DNA mismatch repair protein, C-terminal,IPR014721:Ribosomal protein S5 domain 2-type fold, subgroup,IPR014762:DNA mismatch repair, conserved site,IPR020568:Ribosomal protein S5 domain 2-type fold,	sly03430:Mismatch repair,		SM01340:SM01340,
NODE_259911_length_1570_cov_5.227388	NP_001234641	54	1.46e-06	52.4	MLH1 protein(MLH1)	Solanum lycopersicum		GO:0006298~mismatch repair,		GO:0005524~ATP binding,GO:0030983~mismatched DNA binding,	IPR002099:DNA mismatch repair protein,IPR003594:Histidine kinase-like ATPase, ATP-binding domain,IPR013507:DNA mismatch repair protein, C-terminal,IPR014721:Ribosomal protein S5 domain 2-type fold, subgroup,IPR014762:DNA mismatch repair, conserved site,IPR020568:Ribosomal protein S5 domain 2-type fold,	sly03430:Mismatch repair,		SM01340:SM01340,
NODE_1081825_length_1374_cov_5.026929	NP_001105980	69.231	2.44e-09	61.2	lipoxygenase10(lox10)	Zea mays		GO:0006633~fatty acid biosynthetic process,GO:0007623~circadian rhythm,GO:0009409~response to cold,GO:0009611~response to wounding,GO:0009620~response to fungus,GO:0009723~response to ethylene,GO:0009737~response to abscisic acid,GO:0009751~response to salicylic acid,GO:0009753~response to jasmonic acid,GO:0010597~green leaf volatile biosynthetic process,GO:0031408~oxylipin biosynthetic process,	GO:0009507~chloroplast,	GO:0016165~linoleate 13S-lipoxygenase activity,GO:0046872~metal ion binding,	IPR000907:Lipoxygenase,IPR001024:Lipoxygenase, LH2,IPR001246:Lipoxygenase, plant,IPR013819:Lipoxygenase, C-terminal,IPR020833:Lipoxygenase, iron binding site,IPR020834:Lipoxygenase, conserved site,IPR027433:Lipoxygenase, domain 3,	zma00591:Linoleic acid metabolism,zma00592:alpha-Linolenic acid metabolism,zma01100:Metabolic pathways,zma01110:Biosynthesis of secondary metabolites,		SM00308:LH2,	Dioxygenase,Fatty acid biosynthesis,Fatty acid metabolism,Iron,Lipid biosynthesis,Lipid metabolism,Metal-binding,Oxidoreductase,Oxylipin biosynthesis,
NODE_1081825_length_1374_cov_5.026929	NP_001234259	65	3.08e-09	60.8	lipoxygenase(loxF)	Solanum lycopersicum		GO:0006633~fatty acid biosynthetic process,GO:0031408~oxylipin biosynthetic process,		GO:0016702~oxidoreductase activity, acting on single donors with incorporation of molecular oxygen, incorporation of two atoms of oxygen,GO:0046872~metal ion binding,	IPR000907:Lipoxygenase,IPR001024:Lipoxygenase, LH2,IPR001246:Lipoxygenase, plant,IPR013819:Lipoxygenase, C-terminal,IPR020833:Lipoxygenase, iron binding site,IPR020834:Lipoxygenase, conserved site,IPR027433:Lipoxygenase, domain 3,	sly00591:Linoleic acid metabolism,sly00592:alpha-Linolenic acid metabolism,sly01100:Metabolic pathways,sly01110:Biosynthesis of secondary metabolites,		SM00308:LH2,	Complete proteome,Dioxygenase,Fatty acid biosynthesis,Fatty acid metabolism,Iron,Lipid biosynthesis,Lipid metabolism,Metal-binding,Oxidoreductase,Oxylipin biosynthesis,Reference proteome,
NODE_108197_length_1216_cov_4.927631	NP_862818	81.481	8.48e-06	49.7	Ycf2(ycf2)	Calycanthus floridus var. glaucus			GO:0009570~chloroplast stroma,	GO:0005524~ATP binding,	IPR003593:AAA+ ATPase domain,IPR003959:ATPase, AAA-type, core,IPR008543:Uncharacterised protein family Ycf2,IPR027417:P-loop containing nucleoside triphosphate hydrolase,			SM00382:AAA,	ATP-binding,Chloroplast,Nucleotide-binding,Plastid,	chain:Protein ycf2,nucleotide phosphate-binding region:ATP,
NODE_115511_length_1926_cov_5.081516	NP_862818	45.312	2.5e-06	52.4	Ycf2(ycf2)	Calycanthus floridus var. glaucus			GO:0009570~chloroplast stroma,	GO:0005524~ATP binding,	IPR003593:AAA+ ATPase domain,IPR003959:ATPase, AAA-type, core,IPR008543:Uncharacterised protein family Ycf2,IPR027417:P-loop containing nucleoside triphosphate hydrolase,			SM00382:AAA,	ATP-binding,Chloroplast,Nucleotide-binding,Plastid,	chain:Protein ycf2,nucleotide phosphate-binding region:ATP,
NODE_4874_length_1761_cov_5.337308	NP_862818	55	4.17e-09	54.7	Ycf2(ycf2)	Calycanthus floridus var. glaucus			GO:0009570~chloroplast stroma,	GO:0005524~ATP binding,	IPR003593:AAA+ ATPase domain,IPR003959:ATPase, AAA-type, core,IPR008543:Uncharacterised protein family Ycf2,IPR027417:P-loop containing nucleoside triphosphate hydrolase,			SM00382:AAA,	ATP-binding,Chloroplast,Nucleotide-binding,Plastid,	chain:Protein ycf2,nucleotide phosphate-binding region:ATP,
NODE_65282_length_1138_cov_4.563269	NP_862818	73.864	1.04e-35	105	Ycf2(ycf2)	Calycanthus floridus var. glaucus			GO:0009570~chloroplast stroma,	GO:0005524~ATP binding,	IPR003593:AAA+ ATPase domain,IPR003959:ATPase, AAA-type, core,IPR008543:Uncharacterised protein family Ycf2,IPR027417:P-loop containing nucleoside triphosphate hydrolase,			SM00382:AAA,	ATP-binding,Chloroplast,Nucleotide-binding,Plastid,	chain:Protein ycf2,nucleotide phosphate-binding region:ATP,
NODE_827794_length_2660_cov_5.158271	NP_862818	75	8.9e-16	52.8	Ycf2(ycf2)	Calycanthus floridus var. glaucus			GO:0009570~chloroplast stroma,	GO:0005524~ATP binding,	IPR003593:AAA+ ATPase domain,IPR003959:ATPase, AAA-type, core,IPR008543:Uncharacterised protein family Ycf2,IPR027417:P-loop containing nucleoside triphosphate hydrolase,			SM00382:AAA,	ATP-binding,Chloroplast,Nucleotide-binding,Plastid,	chain:Protein ycf2,nucleotide phosphate-binding region:ATP,
NODE_972779_length_1849_cov_4.592753	NP_862818	81.25	3.75e-15	55.5	Ycf2(ycf2)	Calycanthus floridus var. glaucus			GO:0009570~chloroplast stroma,	GO:0005524~ATP binding,	IPR003593:AAA+ ATPase domain,IPR003959:ATPase, AAA-type, core,IPR008543:Uncharacterised protein family Ycf2,IPR027417:P-loop containing nucleoside triphosphate hydrolase,			SM00382:AAA,	ATP-binding,Chloroplast,Nucleotide-binding,Plastid,	chain:Protein ycf2,nucleotide phosphate-binding region:ATP,
NODE_1082085_length_1207_cov_4.562552	NP_001130358	93.103	9.38e-10	62	NADH-ubiquinone oxidoreductase subunit(LOC100191453)	Zea mays		GO:0042773~ATP synthesis coupled electron transport,	GO:0016020~membrane,	GO:0008137~NADH dehydrogenase (ubiquinone) activity,GO:0009055~electron carrier activity,GO:0051536~iron-sulfur cluster binding,	IPR000283:NADH:ubiquinone oxidoreductase, 75kDa subunit, conserved site,IPR001041:2Fe-2S ferredoxin-type domain,IPR006656:Molybdopterin oxidoreductase,IPR006963:Molybdopterin oxidoreductase, 4Fe-4S domain,IPR010228:NADH:ubiquinone oxidoreductase, subunit G,IPR012675:Beta-grasp domain,IPR015405:NADH-quinone oxidoreductase, chain G, C-terminal,IPR019574:NADH:ubiquinone oxidoreductase, subunit G, ir…	zma00190:Oxidative phosphorylation,zma01100:Metabolic pathways,		SM00929:SM00929,	Complete proteome,Reference proteome,
NODE_1084195_length_1525_cov_4.360000	NP_565910	60	3.75e-15	72	ROTUNDIFOLIA like 8(RTFL8)	Arabidopsis thaliana		GO:0048367~shoot system development,	GO:0005634~nucleus,		IPR012552:DVL,				Complete proteome,Reference proteome,
NODE_1084195_length_1525_cov_4.360000	NP_001319758	76.471	1.68e-12	64.3	ROTUNDIFOLIA like 7(RTFL7)	Arabidopsis thaliana		GO:0048367~shoot system development,	GO:0005739~mitochondrion,
NODE_150699_length_2372_cov_4.743255	NP_001319758	60	2.95e-09	55.5	ROTUNDIFOLIA like 7(RTFL7)	Arabidopsis thaliana		GO:0048367~shoot system development,	GO:0005739~mitochondrion,
NODE_1085345_length_1608_cov_6.731343	NP_001132839	82.993	2.5e-79	249	Ras protein RIC2(LOC100194331)	Zea mays		GO:0007264~small GTPase mediated signal transduction,	GO:0005622~intracellular,	GO:0005525~GTP binding,	IPR001806:Small GTPase superfamily,IPR005225:Small GTP-binding protein domain,IPR027417:P-loop containing nucleoside triphosphate hydrolase,	zma04144:Endocytosis,			Complete proteome,Reference proteome,
NODE_1085345_length_1608_cov_6.731343	NP_001235959	79.592	1.63e-78	247	GTP-binding protein(LOC547654)	Glycine max		GO:0007264~small GTPase mediated signal transduction,	GO:0005622~intracellular,	GO:0005525~GTP binding,	IPR001806:Small GTPase superfamily,IPR005225:Small GTP-binding protein domain,IPR027417:P-loop containing nucleoside triphosphate hydrolase,	gmx04144:Endocytosis,
NODE_108563_length_2413_cov_4.891836	NP_001169188	67.658	3.87e-125	383	uncharacterized LOC100383040(LOC100383040)	Zea mays		GO:0000373~Group II intron splicing,GO:0009658~chloroplast organization,GO:0010468~regulation of gene expression,GO:0015979~photosynthesis,	GO:0009507~chloroplast,	GO:0003723~RNA binding,GO:0008270~zinc ion binding,	IPR023342:APO domain,				Complete proteome,Reference proteome,
NODE_108583_length_1015_cov_3.452217	NP_565148	64.957	8.28e-45	157	Phosphoenolpyruvate carboxylase family protein(AT1G77060)	Arabidopsis thaliana		GO:0006097~glyoxylate cycle,GO:0008152~metabolic process,	GO:0005737~cytoplasm,GO:0009507~chloroplast,GO:0009570~chloroplast stroma,	GO:0003824~catalytic activity,GO:0008807~carboxyvinyl-carboxyphosphonate phosphorylmutase activity,GO:0046912~transferase activity, transferring acyl groups, acyl groups converted into alkyl on transfer,	IPR015813:Pyruvate/Phosphoenolpyruvate kinase-like domain,IPR018523:Isocitrate lyase/phosphorylmutase, conserved site,				Chloroplast,Complete proteome,Plastid,Reference proteome,Transferase,Transit peptide,	chain:Putative carboxyvinyl-carboxyphosphonate phosphorylmutase,
NODE_337771_length_957_cov_4.931035	NP_565148	92.857	5.93e-09	58.2	Phosphoenolpyruvate carboxylase family protein(AT1G77060)	Arabidopsis thaliana		GO:0006097~glyoxylate cycle,GO:0008152~metabolic process,	GO:0005737~cytoplasm,GO:0009507~chloroplast,GO:0009570~chloroplast stroma,	GO:0003824~catalytic activity,GO:0008807~carboxyvinyl-carboxyphosphonate phosphorylmutase activity,GO:0046912~transferase activity, transferring acyl groups, acyl groups converted into alkyl on transfer,	IPR015813:Pyruvate/Phosphoenolpyruvate kinase-like domain,IPR018523:Isocitrate lyase/phosphorylmutase, conserved site,				Chloroplast,Complete proteome,Plastid,Reference proteome,Transferase,Transit peptide,	chain:Putative carboxyvinyl-carboxyphosphonate phosphorylmutase,
NODE_376406_length_1350_cov_4.951852	NP_565148	61.864	6.6e-48	169	Phosphoenolpyruvate carboxylase family protein(AT1G77060)	Arabidopsis thaliana		GO:0006097~glyoxylate cycle,GO:0008152~metabolic process,	GO:0005737~cytoplasm,GO:0009507~chloroplast,GO:0009570~chloroplast stroma,	GO:0003824~catalytic activity,GO:0008807~carboxyvinyl-carboxyphosphonate phosphorylmutase activity,GO:0046912~transferase activity, transferring acyl groups, acyl groups converted into alkyl on transfer,	IPR015813:Pyruvate/Phosphoenolpyruvate kinase-like domain,IPR018523:Isocitrate lyase/phosphorylmutase, conserved site,				Chloroplast,Complete proteome,Plastid,Reference proteome,Transferase,Transit peptide,	chain:Putative carboxyvinyl-carboxyphosphonate phosphorylmutase,
NODE_442557_length_1061_cov_4.439209	NP_565148	60.169	9.08e-41	147	Phosphoenolpyruvate carboxylase family protein(AT1G77060)	Arabidopsis thaliana		GO:0006097~glyoxylate cycle,GO:0008152~metabolic process,	GO:0005737~cytoplasm,GO:0009507~chloroplast,GO:0009570~chloroplast stroma,	GO:0003824~catalytic activity,GO:0008807~carboxyvinyl-carboxyphosphonate phosphorylmutase activity,GO:0046912~transferase activity, transferring acyl groups, acyl groups converted into alkyl on transfer,	IPR015813:Pyruvate/Phosphoenolpyruvate kinase-like domain,IPR018523:Isocitrate lyase/phosphorylmutase, conserved site,				Chloroplast,Complete proteome,Plastid,Reference proteome,Transferase,Transit peptide,	chain:Putative carboxyvinyl-carboxyphosphonate phosphorylmutase,
NODE_108638_length_1502_cov_4.220373	NP_178242	74.257	2.63e-42	160	nucleotide binding protein(AT2G01330)	Arabidopsis thaliana			GO:0005737~cytoplasm,GO:0080008~Cul4-RING E3 ubiquitin ligase complex,	GO:0000166~nucleotide binding,GO:0003779~actin binding,	IPR001680:WD40 repeat,IPR015943:WD40/YVTN repeat-like-containing domain,IPR017986:WD40-repeat-containing domain,IPR019775:WD40 repeat, conserved site,			SM00320:WD40,	Actin-binding,Complete proteome,Reference proteome,Repeat,WD repeat,
NODE_1086610_length_1802_cov_5.358490	NP_195110	42.105	2.07e-08	58.5	Glycosyl hydrolase family 10 protein(AT4G33840)	Arabidopsis thaliana		GO:0005975~carbohydrate metabolic process,	GO:0005576~extracellular region,	GO:0004553~hydrolase activity, hydrolyzing O-glycosyl compounds,	IPR001000:Glycoside hydrolase, family 10,IPR003305:Carbohydrate-binding, CenC-like,IPR008979:Galactose-binding domain-like,IPR013781:Glycoside hydrolase, catalytic domain,IPR017853:Glycoside hydrolase, superfamily,			SM00633:Glyco_10,	Complete proteome,Hydrolase,Reference proteome,Signal,
NODE_1086610_length_1802_cov_5.358490	NP_195109	40.351	4.41e-07	54.3	Glycosyl hydrolase family 10 protein(AT4G33830)	Arabidopsis thaliana		GO:0005975~carbohydrate metabolic process,	GO:0005576~extracellular region,	GO:0004553~hydrolase activity, hydrolyzing O-glycosyl compounds,	IPR001000:Glycoside hydrolase, family 10,IPR008979:Galactose-binding domain-like,IPR013781:Glycoside hydrolase, catalytic domain,IPR017853:Glycoside hydrolase, superfamily,			SM00633:Glyco_10,	Complete proteome,Hydrolase,Reference proteome,Signal,
NODE_109346_length_5427_cov_4.803943	NP_001236171	80.392	1.79e-20	93.2	uncharacterized LOC100305492(LOC100305492)	Glycine max					IPR021374:Protein of unknown function DUF2996,
NODE_109506_length_1203_cov_4.596010	NP_193361	50	4.71e-57	192	Glycosyl hydrolase superfamily protein(AT4G16260)	Arabidopsis thaliana		GO:0002215~defense response to nematode,GO:0005975~carbohydrate metabolic process,GO:0009651~response to salt stress,GO:0009817~defense response to fungus, incompatible interaction,	GO:0005615~extracellular space,GO:0005618~cell wall,GO:0005774~vacuolar membrane,GO:0046658~anchored component of plasma membrane,GO:0048046~apoplast,	GO:0004553~hydrolase activity, hydrolyzing O-glycosyl compounds,GO:0030247~polysaccharide binding,GO:0042973~glucan endo-1,3-beta-D-glucosidase activity,	IPR000490:Glycoside hydrolase, family 17,IPR013781:Glycoside hydrolase, catalytic domain,IPR017853:Glycoside hydrolase, superfamily,				Apoplast,Complete proteome,Glycosidase,Hydrolase,Plant defense,Reference proteome,Secreted,Signal,
NODE_1095323_length_970_cov_3.017526	NP_001241359	53.03	9.73e-17	79	2-aminoethanethiol dioxygenase-like(LOC100819405)	Glycine max		GO:0009061~anaerobic respiration,GO:0018171~peptidyl-cysteine oxidation,GO:0070483~detection of hypoxia,		GO:0016702~oxidoreductase activity, acting on single donors with incorporation of molecular oxygen, incorporation of two atoms of oxygen,	IPR011051:RmlC-like cupin domain,IPR012864:Cysteamine dioxygenase,IPR014710:RmlC-like jelly roll fold,	gmx00430:Taurine and hypotaurine metabolism,gmx01100:Metabolic pathways,			Complete proteome,Reference proteome,
NODE_1095323_length_970_cov_3.017526	NP_001183659	52.308	5.95e-16	77.8	uncharacterized LOC100502253(LOC100502253)	Zea mays				GO:0016702~oxidoreductase activity, acting on single donors with incorporation of molecular oxygen, incorporation of two atoms of oxygen,	IPR011051:RmlC-like cupin domain,IPR012864:Cysteamine dioxygenase,IPR014710:RmlC-like jelly roll fold,	zma00430:Taurine and hypotaurine metabolism,zma01100:Metabolic pathways,			Complete proteome,Reference proteome,
NODE_1095956_length_1179_cov_4.849025	NP_001302958	39.394	1.4e-06	51.6	transcription factor ABORTED MICROSPORES-like(LOC106439826)	Brassica napus					IPR011598:Myc-type, basic helix-loop-helix (bHLH) domain,IPR025610:Transcription factor MYC/MYB N-terminal,			SM00353:HLH,	Coiled coil,
NODE_474092_length_1146_cov_3.945026	NP_001302958	40.58	1.28e-06	52	transcription factor ABORTED MICROSPORES-like(LOC106439826)	Brassica napus					IPR011598:Myc-type, basic helix-loop-helix (bHLH) domain,IPR025610:Transcription factor MYC/MYB N-terminal,			SM00353:HLH,	Coiled coil,
NODE_536654_length_2124_cov_5.084746	NP_001302958	58.73	1.07e-14	79	transcription factor ABORTED MICROSPORES-like(LOC106439826)	Brassica napus					IPR011598:Myc-type, basic helix-loop-helix (bHLH) domain,IPR025610:Transcription factor MYC/MYB N-terminal,			SM00353:HLH,	Coiled coil,
NODE_109719_length_5112_cov_4.854851	NP_568658	60.638	2.18e-60	224	cullin4(CUL4)	Arabidopsis thaliana		GO:0000209~protein polyubiquitination,GO:0006281~DNA repair,GO:0006511~ubiquitin-dependent protein catabolic process,GO:0009640~photomorphogenesis,GO:0009738~abscisic acid-activated signaling pathway,GO:0009755~hormone-mediated signaling pathway,GO:0009908~flower development,GO:0010100~negative regulation of photomorphogenesis,GO:0010154~fruit development,GO:0010182~sugar mediated signaling pathw…	GO:0000151~ubiquitin ligase complex,GO:0005634~nucleus,GO:0005829~cytosol,GO:0031461~cullin-RING ubiquitin ligase complex,GO:0080008~Cul4-RING E3 ubiquitin ligase complex,	GO:0005515~protein binding,GO:0031625~ubiquitin protein ligase binding,GO:0061630~ubiquitin protein ligase activity,	IPR001373:Cullin, N-terminal,IPR011991:Winged helix-turn-helix DNA-binding domain,IPR016157:Cullin, conserved site,IPR016158:Cullin homology,IPR016159:Cullin repeat-like-containing domain,IPR019559:Cullin protein, neddylation domain,	ath03420:Nucleotide excision repair,ath04120:Ubiquitin mediated proteolysis,		SM00182:CULLIN,SM00884:SM00884,	Abscisic acid signaling pathway,Complete proteome,Isopeptide bond,Nucleus,Reference proteome,Ubl conjugation,Ubl conjugation pathway,
NODE_1101843_length_985_cov_3.837564	NP_001137048	42.553	1.36e-24	105	uncharacterized LOC100217220(LOC100217220)	Zea mays		GO:0008152~metabolic process,		GO:0016758~transferase activity, transferring hexosyl groups,	IPR002213:UDP-glucuronosyl/UDP-glucosyltransferase,				Complete proteome,Glycosyltransferase,Reference proteome,Transferase,
NODE_1101843_length_985_cov_3.837564	NP_001147999	40.559	7.66e-25	105	anthocyanidin 3-O-glucosyltransferase(LOC100281608)	Zea mays	Carbohydrate transport and metabolism / Signal transduction mechanisms,	GO:0008152~metabolic process,		GO:0016758~transferase activity, transferring hexosyl groups,	IPR002213:UDP-glucuronosyl/UDP-glucosyltransferase,				Complete proteome,Reference proteome,Transferase,
NODE_110408_length_1443_cov_5.688149	NP_001315280	60.241	1.31e-24	102	ATP synthase subunit delta, mitochondrial(LOC101268282)	Solanum lycopersicum						sly00190:Oxidative phosphorylation,sly01100:Metabolic pathways,
NODE_110408_length_1443_cov_5.688149	NP_001314510	59.524	1.34e-24	102	ATP synthase subunit delta', mitochondrial-like(LOC107950798)	Gossypium hirsutum		GO:0006754~ATP biosynthetic process,GO:0015986~ATP synthesis coupled proton transport,GO:0090378~seed trichome elongation,	GO:0045261~proton-transporting ATP synthase complex, catalytic core F(1),	GO:0046933~proton-transporting ATP synthase activity, rotational mechanism,GO:0046961~proton-transporting ATPase activity, rotational mechanism,	IPR001469:ATPase, F1 complex, delta/epsilon subunit,IPR020546:ATPase, F1 complex, delta/epsilon subunit, N-terminal,
NODE_110408_length_1443_cov_5.688149	NP_001147558	57.831	9.56e-23	97.1	ATP synthase delta chain(LOC100281167)	Zea mays		GO:0015986~ATP synthesis coupled proton transport,	GO:0045261~proton-transporting ATP synthase complex, catalytic core F(1),	GO:0046933~proton-transporting ATP synthase activity, rotational mechanism,GO:0046961~proton-transporting ATPase activity, rotational mechanism,	IPR001469:ATPase, F1 complex, delta/epsilon subunit,IPR020546:ATPase, F1 complex, delta/epsilon subunit, N-terminal,	zma00190:Oxidative phosphorylation,zma01100:Metabolic pathways,
NODE_1104270_length_1553_cov_4.747585	NP_197680	46.178	1.67e-85	270	C2H2 and C2HC zinc fingers superfamily protein(AT5G22890)	Arabidopsis thaliana		GO:0006355~regulation of transcription, DNA-templated,GO:0010200~response to chitin,	GO:0005634~nucleus,	GO:0003676~nucleic acid binding,GO:0003700~transcription factor activity, sequence-specific DNA binding,GO:0046872~metal ion binding,	IPR007087:Zinc finger, C2H2,IPR013087:Zinc finger C2H2-type/integrase DNA-binding domain,IPR015880:Zinc finger, C2H2-like,			SM00355:ZnF_C2H2,	Complete proteome,Reference proteome,
NODE_1104270_length_1553_cov_4.747585	NP_001237699	45.566	1.12e-77	254	C2-H2 zinc finger protein(STOP1)	Glycine max				GO:0003676~nucleic acid binding,GO:0046872~metal ion binding,	IPR007087:Zinc finger, C2H2,IPR013087:Zinc finger C2H2-type/integrase DNA-binding domain,IPR015880:Zinc finger, C2H2-like,			SM00355:ZnF_C2H2,	Complete proteome,Reference proteome,
NODE_1106714_length_2309_cov_5.432655	NP_001275489	71.429	3.86e-16	82.4	uncharacterized LOC102585087(LOC102585087)	Solanum tuberosum					IPR012946:X8,			SM00768:X8,	Signal,
NODE_110824_length_2121_cov_4.979255	NP_001236168	67.442	3.39e-08	56.6	uncharacterized LOC100499796(LOC100499796)	Glycine max		GO:0015986~ATP synthesis coupled proton transport,	GO:0016020~membrane,	GO:0046933~proton-transporting ATP synthase activity, rotational mechanism,	IPR000711:ATPase, F1 complex, OSCP/delta subunit,IPR020781:ATPase, F1 complex, OSCP/delta subunit, conserved site,IPR026015:F1F0 ATP synthase OSCP/delta subunit, N-terminal domain,	gmx00190:Oxidative phosphorylation,gmx01100:Metabolic pathways,			Complete proteome,Reference proteome,
NODE_11084_length_1721_cov_4.363742	NP_001149628	65.854	3.82e-08	56.6	uncharacterized LOC100283254(pco091513b)	Zea mays		GO:0007275~multicellular organism development,		GO:0004725~protein tyrosine phosphatase activity,	IPR006545:EYA,				Complete proteome,Reference proteome,
NODE_11084_length_1721_cov_4.363742	NP_001242218	61.905	4.64e-07	53.5	eyes absent homolog 4-like(LOC100799315)	Glycine max		GO:0007275~multicellular organism development,		GO:0004725~protein tyrosine phosphatase activity,	IPR006545:EYA,IPR023214:HAD-like domain,
NODE_1110432_length_1429_cov_4.825052	NP_849392	37.363	5.27e-10	57.4	heat shock factor binding protein(HSBP)	Arabidopsis thaliana		GO:0009408~response to heat,GO:0048316~seed development,GO:0070370~cellular heat acclimation,	GO:0005634~nucleus,GO:0005794~Golgi apparatus,GO:0005829~cytosol,	GO:0003714~transcription corepressor activity,GO:0031072~heat shock protein binding,	IPR009643:Heat shock factor binding 1,				Complete proteome,Reference proteome,Stress response,
NODE_1111622_length_1078_cov_5.066791	NP_001078158	38.624	3.64e-30	120	Serine/threonine-protein kinase WNK (With No Lysine)-like protein(AT3G15240)	Arabidopsis thaliana		GO:0006468~protein phosphorylation,GO:0035556~intracellular signal transduction,	GO:0005634~nucleus,GO:0005829~cytosol,	GO:0004674~protein serine/threonine kinase activity,	IPR025610:Transcription factor MYC/MYB N-terminal,				Complete proteome,Kinase,Reference proteome,Transferase,
NODE_1111622_length_1078_cov_5.066791	NP_001146020	58.065	2.16e-23	102	uncharacterized LOC100279551(LOC100279551)	Zea mays					IPR025610:Transcription factor MYC/MYB N-terminal,				Complete proteome,Reference proteome,
NODE_120842_length_1148_cov_5.284843	NP_001146020	29.6	8.94e-14	73.9	uncharacterized LOC100279551(LOC100279551)	Zea mays					IPR025610:Transcription factor MYC/MYB N-terminal,				Complete proteome,Reference proteome,
NODE_50882_length_978_cov_5.802659	NP_001146020	51.887	4.23e-24	103	uncharacterized LOC100279551(LOC100279551)	Zea mays					IPR025610:Transcription factor MYC/MYB N-terminal,				Complete proteome,Reference proteome,
NODE_1111912_length_1078_cov_5.524119	NP_001150788	46.154	6.36e-14	70.9	N-acetyltransferase(GNAT32)	Zea mays	Translation, ribosomal structure and biogenesis,			GO:0008080~N-acetyltransferase activity,	IPR000182:GNAT domain,IPR016181:Acyl-CoA N-acyltransferase,				Complete proteome,Reference proteome,Transferase,
NODE_1112393_length_1177_cov_3.962617	NP_001132810	65.517	6.72e-06	49.3	putative ACR family protein(LOC100194300)	Zea mays					IPR003788:Putative S-adenosyl-L-methionine-dependent methyltransferase MidA,				Complete proteome,Reference proteome,
NODE_111305_length_2142_cov_4.895892	NP_175981	62.712	4.45e-54	164	cellulose synthase like E1(CSLE1)	Arabidopsis thaliana		GO:0000271~polysaccharide biosynthetic process,GO:0009832~plant-type cell wall biogenesis,GO:0009833~plant-type primary cell wall biogenesis,GO:0030244~cellulose biosynthetic process,GO:0071555~cell wall organization,	GO:0000139~Golgi membrane,GO:0005783~endoplasmic reticulum,GO:0005789~endoplasmic reticulum membrane,GO:0005794~Golgi apparatus,GO:0005886~plasma membrane,GO:0016021~integral component of membrane,	GO:0000977~RNA polymerase II regulatory region sequence-specific DNA binding,GO:0016757~transferase activity, transferring glycosyl groups,GO:0016759~cellulose synthase activity,GO:0016760~cellulose synthase (UDP-forming) activity,	IPR005150:Cellulose synthase,				Cell wall biogenesis/degradation,Complete proteome,Endoplasmic reticulum,Glycosyltransferase,Golgi apparatus,Membrane,Reference proteome,Transferase,Transmembrane,Transmembrane helix,	chain:Cellulose synthase-like protein E1,transmembrane region,
NODE_398649_length_2482_cov_5.209911	NP_175981	45.349	1.54e-32	136	cellulose synthase like E1(CSLE1)	Arabidopsis thaliana		GO:0000271~polysaccharide biosynthetic process,GO:0009832~plant-type cell wall biogenesis,GO:0009833~plant-type primary cell wall biogenesis,GO:0030244~cellulose biosynthetic process,GO:0071555~cell wall organization,	GO:0000139~Golgi membrane,GO:0005783~endoplasmic reticulum,GO:0005789~endoplasmic reticulum membrane,GO:0005794~Golgi apparatus,GO:0005886~plasma membrane,GO:0016021~integral component of membrane,	GO:0000977~RNA polymerase II regulatory region sequence-specific DNA binding,GO:0016757~transferase activity, transferring glycosyl groups,GO:0016759~cellulose synthase activity,GO:0016760~cellulose synthase (UDP-forming) activity,	IPR005150:Cellulose synthase,				Cell wall biogenesis/degradation,Complete proteome,Endoplasmic reticulum,Glycosyltransferase,Golgi apparatus,Membrane,Reference proteome,Transferase,Transmembrane,Transmembrane helix,	chain:Cellulose synthase-like protein E1,transmembrane region,
NODE_111305_length_2142_cov_4.895892	NP_001312369	60.169	2.1e-53	153	cellulose synthase-like protein E6(LOC107787706)	Nicotiana tabacum		GO:0030244~cellulose biosynthetic process,GO:0071555~cell wall organization,	GO:0016021~integral component of membrane,	GO:0016760~cellulose synthase (UDP-forming) activity,	IPR005150:Cellulose synthase,				Cell wall biogenesis/degradation,Glycosyltransferase,Membrane,Transferase,Transmembrane,Transmembrane helix,
NODE_1114077_length_2593_cov_4.274971	NP_001312288	64.683	1.12e-109	346	geranylgeranyl diphosphate reductase, chloroplastic(LOC107783257)	Nicotiana tabacum		GO:0010189~vitamin E biosynthetic process,GO:0015979~photosynthesis,GO:0015995~chlorophyll biosynthetic process,GO:0033385~geranylgeranyl diphosphate metabolic process,GO:0033521~phytyl diphosphate biosynthetic process,	GO:0009507~chloroplast,	GO:0016628~oxidoreductase activity, acting on the CH-CH group of donors, NAD or NADP as acceptor,GO:0045550~geranylgeranyl reductase activity,GO:0071949~FAD binding,	IPR002938:Monooxygenase, FAD-binding,IPR010253:Geranylgeranyl reductase, plant/prokaryotic,IPR011774:Geranylgeranyl reductase, plant/cyanobacteria,IPR011777:Geranylgeranyl reductase family,IPR016040:NAD(P)-binding domain,IPR023753:Pyridine nucleotide-disulphide oxidoreductase, FAD/NAD(P)-binding domain,				Chlorophyll biosynthesis,Chloroplast,NADP,Oxidoreductase,Photosynthesis,Plastid,Transit peptide,
NODE_111469_length_2618_cov_5.226891	NP_001152690	58.824	7.63e-06	48.1	senescence-associated protein DIN1(LOC100286331)	Zea mays					IPR001763:Rhodanese-like domain,			SM00450:RHOD,	Complete proteome,Reference proteome,Signal,
NODE_37524_length_2701_cov_4.885228	NP_001152690	69.231	2.86e-06	46.2	senescence-associated protein DIN1(LOC100286331)	Zea mays					IPR001763:Rhodanese-like domain,			SM00450:RHOD,	Complete proteome,Reference proteome,Signal,
NODE_37524_length_2701_cov_4.885228	NP_001152690	50	2.86e-06	26.2	senescence-associated protein DIN1(LOC100286331)	Zea mays					IPR001763:Rhodanese-like domain,			SM00450:RHOD,	Complete proteome,Reference proteome,Signal,
NODE_111874_length_1540_cov_5.880519	NP_001233999	67.647	1.7e-14	57	beta 1,3-glycosyltransferase-like protein I(LOC543789)	Solanum lycopersicum		GO:0006486~protein glycosylation,	GO:0000139~Golgi membrane,GO:0016021~integral component of membrane,	GO:0008378~galactosyltransferase activity,	IPR002659:Glycosyl transferase, family 31,IPR025298:Domain of unknown function DUF4094,				Complete proteome,Glycosyltransferase,Golgi apparatus,Manganese,Membrane,Reference proteome,Signal-anchor,Transferase,Transmembrane,Transmembrane helix,
NODE_1119154_length_1214_cov_5.173806	NP_200789	44.355	8.8e-23	102	Subtilase family protein(SBT5.4)	Arabidopsis thaliana		GO:0006508~proteolysis,GO:0008152~metabolic process,GO:0010074~maintenance of meristem identity,GO:0040008~regulation of growth,	GO:0005618~cell wall,GO:0005783~endoplasmic reticulum,GO:0005886~plasma membrane,	GO:0004252~serine-type endopeptidase activity,	IPR000209:Peptidase S8/S53 domain,IPR003137:Protease-associated domain, PA,IPR009020:Proteinase inhibitor, propeptide,IPR010259:Proteinase inhibitor I9,IPR015500:Peptidase S8, subtilisin-related,IPR023828:Peptidase S8, subtilisin, Ser-active site,				Cell membrane,Complete proteome,Endoplasmic reticulum,Glycoprotein,Growth regulation,Hydrolase,Membrane,Protease,Reference proteome,Serine protease,Signal,
NODE_1119154_length_1214_cov_5.173806	NP_565309	44.355	9.69e-23	102	Subtilisin-like serine endopeptidase family protein(AIR3)	Arabidopsis thaliana		GO:0006508~proteolysis,GO:0008152~metabolic process,GO:0009733~response to auxin,GO:0010102~lateral root morphogenesis,	GO:0005576~extracellular region,GO:0005618~cell wall,	GO:0004252~serine-type endopeptidase activity,	IPR000209:Peptidase S8/S53 domain,IPR010259:Proteinase inhibitor I9,IPR015500:Peptidase S8, subtilisin-related,IPR023828:Peptidase S8, subtilisin, Ser-active site,				Cell wall,Complete proteome,Glycoprotein,Hydrolase,Protease,Reference proteome,Secreted,Serine protease,Signal,
NODE_572808_length_1944_cov_4.609054	NP_565309	66.667	2.12e-13	51.2	Subtilisin-like serine endopeptidase family protein(AIR3)	Arabidopsis thaliana		GO:0006508~proteolysis,GO:0008152~metabolic process,GO:0009733~response to auxin,GO:0010102~lateral root morphogenesis,	GO:0005576~extracellular region,GO:0005618~cell wall,	GO:0004252~serine-type endopeptidase activity,	IPR000209:Peptidase S8/S53 domain,IPR010259:Proteinase inhibitor I9,IPR015500:Peptidase S8, subtilisin-related,IPR023828:Peptidase S8, subtilisin, Ser-active site,				Cell wall,Complete proteome,Glycoprotein,Hydrolase,Protease,Reference proteome,Secreted,Serine protease,Signal,
NODE_111982_length_1515_cov_4.289109	NP_172089	67.606	6.34e-16	76.3	EF hand calcium-binding protein family(AT1G05990)	Arabidopsis thaliana				GO:0005509~calcium ion binding,	IPR002048:EF-hand domain,IPR011992:EF-hand-like domain,IPR018247:EF-Hand 1, calcium-binding site,	ath04626:Plant-pathogen interaction,		SM00054:EFh,	Calcium,Complete proteome,Metal-binding,Reference proteome,Repeat,	calcium-binding region:1,calcium-binding region:2,calcium-binding region:3,calcium-binding region:4,chain:Calmodulin-like protein 7,domain:EF-hand 1,domain:EF-hand 2,domain:EF-hand 3,domain:EF-hand 4,modified residue,
NODE_1123278_length_1181_cov_4.308213	NP_001237648	55.319	7.89e-07	51.2	Rieske iron-sulphur protein precursor(PETC)	Glycine max		GO:0015979~photosynthesis,	GO:0016021~integral component of membrane,GO:0042651~thylakoid membrane,	GO:0009496~plastoquinol--plastocyanin reductase activity,GO:0045158~electron transporter, transferring electrons within cytochrome b6/f complex of photosystem II activity,GO:0046872~metal ion binding,GO:0051537~2 iron, 2 sulfur cluster binding,	IPR005805:Rieske iron-sulphur protein, C-terminal,IPR014349:Rieske iron-sulphur protein,IPR014909:Cytochrome b6-f complex Fe-S subunit,IPR017941:Rieske [2Fe-2S] iron-sulphur domain,IPR023960:Cytochrome b6-f complex iron-sulfur subunit,	gmx00195:Photosynthesis,gmx01100:Metabolic pathways,			2Fe-2S,Electron transport,Iron,Iron-sulfur,Membrane,Metal-binding,Oxidoreductase,Transmembrane,Transmembrane helix,Transport,
NODE_1123658_length_1307_cov_6.138485	NP_001313868	45.299	2.16e-21	98.6	homeobox-leucine zipper protein HDG11-like(LOC107904747)	Gossypium hirsutum		GO:0006355~regulation of transcription, DNA-templated,	GO:0005634~nucleus,	GO:0008289~lipid binding,GO:0043565~sequence-specific DNA binding,	IPR001356:Homeodomain,IPR002913:START domain,IPR009057:Homeodomain-like,IPR017970:Homeobox, conserved site,IPR023393:START-like domain,			SM00234:START,SM00389:HOX,	DNA-binding,Homeobox,Nucleus,
NODE_514126_length_1159_cov_3.890423	NP_001313868	60.736	7.21e-86	180	homeobox-leucine zipper protein HDG11-like(LOC107904747)	Gossypium hirsutum		GO:0006355~regulation of transcription, DNA-templated,	GO:0005634~nucleus,	GO:0008289~lipid binding,GO:0043565~sequence-specific DNA binding,	IPR001356:Homeodomain,IPR002913:START domain,IPR009057:Homeodomain-like,IPR017970:Homeobox, conserved site,IPR023393:START-like domain,			SM00234:START,SM00389:HOX,	DNA-binding,Homeobox,Nucleus,
NODE_1123658_length_1307_cov_6.138485	NP_001318750	42.609	1.16e-17	87	homeobox-7(HB-7)	Arabidopsis thaliana		GO:0006351~transcription, DNA-templated,GO:0006355~regulation of transcription, DNA-templated,GO:0048497~maintenance of floral organ identity,	GO:0005634~nucleus,	GO:0003677~DNA binding,GO:0003700~transcription factor activity, sequence-specific DNA binding,GO:0008289~lipid binding,GO:0043565~sequence-specific DNA binding,	IPR001356:Homeodomain,IPR002913:START domain,IPR009057:Homeodomain-like,IPR017970:Homeobox, conserved site,			SM00234:START,SM00389:HOX,	Coiled coil,Complete proteome,DNA-binding,Homeobox,Nucleus,Reference proteome,Transcription,Transcription regulation,	chain:Homeobox-leucine zipper protein HDG5,compositionally biased region:Poly-Asn,compositionally biased region:Poly-Ser,DNA-binding region:Homeobox,domain:START,
NODE_1125094_length_1018_cov_4.613949	NP_001302730	66.667	4.43e-10	62.4	probable serine/threonine-protein kinase drkA(LOC106401846)	Brassica napus				GO:0004672~protein kinase activity,GO:0005524~ATP binding,GO:0016597~amino acid binding,	IPR000719:Protein kinase, catalytic domain,IPR001245:Serine-threonine/tyrosine-protein kinase catalytic domain,IPR002912:ACT domain,IPR008271:Serine/threonine-protein kinase, active site,IPR011009:Protein kinase-like domain,			SM00220:S_TKc,	Kinase,Transferase,
NODE_1125094_length_1018_cov_4.613949	NP_001303099	61.905	8.1e-09	58.5	tyrosine-protein kinase FRK-like(LOC106361286)	Brassica napus				GO:0004672~protein kinase activity,GO:0005524~ATP binding,GO:0016597~amino acid binding,	IPR000719:Protein kinase, catalytic domain,IPR001245:Serine-threonine/tyrosine-protein kinase catalytic domain,IPR002912:ACT domain,IPR008271:Serine/threonine-protein kinase, active site,IPR011009:Protein kinase-like domain,			SM00220:S_TKc,	Kinase,Transferase,
NODE_1126063_length_1515_cov_4.548515	NP_001327319	64	1.07e-13	74.3	serine carboxypeptidase-like 16(scpl16)	Arabidopsis thaliana		GO:0006508~proteolysis,GO:0019748~secondary metabolic process,GO:0051603~proteolysis involved in cellular protein catabolic process,	GO:0005576~extracellular region,	GO:0004180~carboxypeptidase activity,GO:0004185~serine-type carboxypeptidase activity,GO:0016747~transferase activity, transferring acyl groups other than amino-acyl groups,	IPR001563:Peptidase S10, serine carboxypeptidase,				Carboxypeptidase,Complete proteome,Disulfide bond,Glycoprotein,Hydrolase,Protease,Reference proteome,Secreted,Signal,	chain:Serine carboxypeptidase-like 16,disulfide bond,glycosylation site:N-linked (GlcNAc...),signal peptide,
NODE_1128206_length_2150_cov_5.669302	NP_680299	37.288	1.64e-06	52.8	hAT dimerization domain-containing protein / transposase-like protein(AT5G33406)	Arabidopsis thaliana				GO:0003676~nucleic acid binding,GO:0046983~protein dimerization activity,	IPR008906:HAT dimerisation,IPR012337:Ribonuclease H-like domain,				Complete proteome,Reference proteome,
NODE_279413_length_2298_cov_4.505657	NP_680299	39.062	8.08e-07	53.9	hAT dimerization domain-containing protein / transposase-like protein(AT5G33406)	Arabidopsis thaliana				GO:0003676~nucleic acid binding,GO:0046983~protein dimerization activity,	IPR008906:HAT dimerisation,IPR012337:Ribonuclease H-like domain,				Complete proteome,Reference proteome,
NODE_288467_length_1867_cov_5.190145	NP_680299	42.647	6.25e-06	50.4	hAT dimerization domain-containing protein / transposase-like protein(AT5G33406)	Arabidopsis thaliana				GO:0003676~nucleic acid binding,GO:0046983~protein dimerization activity,	IPR008906:HAT dimerisation,IPR012337:Ribonuclease H-like domain,				Complete proteome,Reference proteome,
NODE_402534_length_2739_cov_5.100401	NP_680299	50.877	2.44e-09	62.4	hAT dimerization domain-containing protein / transposase-like protein(AT5G33406)	Arabidopsis thaliana				GO:0003676~nucleic acid binding,GO:0046983~protein dimerization activity,	IPR008906:HAT dimerisation,IPR012337:Ribonuclease H-like domain,				Complete proteome,Reference proteome,
NODE_56427_length_2568_cov_5.091511	NP_680299	54.545	3.68e-34	80.9	hAT dimerization domain-containing protein / transposase-like protein(AT5G33406)	Arabidopsis thaliana				GO:0003676~nucleic acid binding,GO:0046983~protein dimerization activity,	IPR008906:HAT dimerisation,IPR012337:Ribonuclease H-like domain,				Complete proteome,Reference proteome,
NODE_113410_length_1599_cov_5.612883	NP_190710	51.948	2.51e-19	91.3	strictosidine synthase-like 4(SSL4)	Arabidopsis thaliana	Carbohydrate transport and metabolism,	GO:0009058~biosynthetic process,GO:0009611~response to wounding,GO:0009753~response to jasmonic acid,GO:0009821~alkaloid biosynthetic process,	GO:0005773~vacuole,GO:0005783~endoplasmic reticulum,GO:0009507~chloroplast,GO:0016020~membrane,	GO:0016788~hydrolase activity, acting on ester bonds,GO:0016844~strictosidine synthase activity,	IPR011042:Six-bladed beta-propeller, TolB-like,IPR018119:Strictosidine synthase, conserved region,				Complete proteome,Glycoprotein,Phosphoprotein,Reference proteome,Signal,Vacuole,
NODE_1134393_length_1208_cov_4.636590	NP_001148668	60.145	7.3e-54	184	uncharacterized LOC100282284(pco072957b)	Zea mays		GO:0006979~response to oxidative stress,GO:0042744~hydrogen peroxide catabolic process,	GO:0005576~extracellular region,	GO:0004601~peroxidase activity,GO:0020037~heme binding,GO:0046872~metal ion binding,	IPR000823:Plant peroxidase,IPR002016:Haem peroxidase, plant/fungal/bacterial,IPR010255:Haem peroxidase,IPR019793:Peroxidases heam-ligand binding site,IPR019794:Peroxidase, active site,	zma00940:Phenylpropanoid biosynthesis,zma01100:Metabolic pathways,zma01110:Biosynthesis of secondary metabolites,			Calcium,Complete proteome,Disulfide bond,Heme,Hydrogen peroxide,Iron,Metal-binding,Oxidoreductase,Peroxidase,Reference proteome,Secreted,Signal,
NODE_1134393_length_1208_cov_4.636590	NP_189460	61.654	1.05e-48	169	Peroxidase superfamily protein(AT3G28200)	Arabidopsis thaliana		GO:0006979~response to oxidative stress,GO:0042744~hydrogen peroxide catabolic process,GO:0055114~oxidation-reduction process,	GO:0005576~extracellular region,GO:0005829~cytosol,GO:0009505~plant-type cell wall,	GO:0004601~peroxidase activity,GO:0005515~protein binding,GO:0020037~heme binding,GO:0046872~metal ion binding,	IPR000823:Plant peroxidase,IPR002016:Haem peroxidase, plant/fungal/bacterial,IPR010255:Haem peroxidase,IPR019793:Peroxidases heam-ligand binding site,IPR019794:Peroxidase, active site,	ath00940:Phenylpropanoid biosynthesis,ath01100:Metabolic pathways,ath01110:Biosynthesis of secondary metabolites,			Calcium,Complete proteome,Disulfide bond,Glycoprotein,Heme,Hydrogen peroxide,Iron,Metal-binding,Oxidoreductase,Peroxidase,Reference proteome,Secreted,Signal,	active site:Proton acceptor,binding site:Substrate; via carbonyl oxygen,chain:Peroxidase 31,disulfide bond,glycosylation site:N-linked (GlcNAc...),metal ion-binding site:Calcium 1,metal ion-binding site:Calcium 1; via carbonyl oxygen,metal ion-binding site:Calcium 2,metal ion-binding site:Iron (heme axial ligand),sequence conflict,signal peptide,site:Transition state stabilizer,
NODE_113555_length_4588_cov_4.862249	NP_001242409	84.615	2.92e-18	89	beta-carotene 3-hydroxylase 1, chloroplastic-like(LOC100785541)	Glycine max		GO:0006633~fatty acid biosynthetic process,	GO:0016021~integral component of membrane,	GO:0005506~iron ion binding,GO:0016491~oxidoreductase activity,	IPR006694:Fatty acid hydroxylase,	gmx00906:Carotenoid biosynthesis,gmx01100:Metabolic pathways,gmx01110:Biosynthesis of secondary metabolites,			Membrane,Transmembrane,Transmembrane helix,
NODE_1139826_length_1865_cov_4.553887	NP_001077999	39.64	3.84e-14	76.3	CCT motif family protein(AT2G33350)	Arabidopsis thaliana			GO:0005634~nucleus,		IPR010402:CCT domain,				Complete proteome,Reference proteome,
NODE_1140242_length_1447_cov_4.066344	NP_001310809	49.057	4.68e-06	50.4	adagio protein 1(LOC107426639)	Ziziphus jujuba					IPR000014:PAS domain,IPR001810:F-box domain, cyclin-like,IPR011043:Galactose oxidase/kelch, beta-propeller,IPR011498:Kelch repeat type 2,IPR015915:Kelch-type beta propeller,
NODE_7742_length_2090_cov_4.283254	NP_001310809	84.058	0	772	adagio protein 1(LOC107426639)	Ziziphus jujuba					IPR000014:PAS domain,IPR001810:F-box domain, cyclin-like,IPR011043:Galactose oxidase/kelch, beta-propeller,IPR011498:Kelch repeat type 2,IPR015915:Kelch-type beta propeller,
NODE_114231_length_2627_cov_4.179673	NP_196599	48.214	9.02e-07	54.7	helicase domain-containing protein / IBR domain-containing protein / zinc finger protein-like protein(AT5G10370)	Arabidopsis thaliana		GO:0006396~RNA processing,	GO:0005634~nucleus,GO:0005737~cytoplasm,GO:0009507~chloroplast,	GO:0003676~nucleic acid binding,GO:0004004~ATP-dependent RNA helicase activity,GO:0004386~helicase activity,GO:0005524~ATP binding,GO:0008270~zinc ion binding,GO:0044822~poly(A) RNA binding,	IPR001650:Helicase, C-terminal,IPR001841:Zinc finger, RING-type,IPR002464:DNA/RNA helicase, ATP-dependent, DEAH-box type, conserved site,IPR002867:Zinc finger, C6HC-type,IPR007087:Zinc finger, C2H2,IPR007502:Helicase-associated domain,IPR011545:DNA/RNA helicase, DEAD/DEAH box type, N-terminal,IPR011709:Domain of unknown function DUF1605,IPR013083:Zinc finger, RING/FYVE/PHD-type,IPR014001:Helicase…	ath03040:Spliceosome,		SM00487:DEXDc,SM00490:HELICc,SM00647:IBR,SM00847:SM00847,	ATP-binding,Chloroplast,Complete proteome,Helicase,Hydrolase,Metal-binding,Nucleotide-binding,Plastid,Reference proteome,Repeat,Transit peptide,Zinc,Zinc-finger,
NODE_1142414_length_1059_cov_4.463645	NP_178708	44.776	2.79e-06	49.7	xyloglucan endotransglucosylase/hydrolase 4(XTH4)	Arabidopsis thaliana		GO:0009612~response to mechanical stimulus,GO:0009645~response to low light intensity stimulus,GO:0009733~response to auxin,GO:0009826~unidimensional cell growth,GO:0010411~xyloglucan metabolic process,GO:0042546~cell wall biogenesis,GO:0071555~cell wall organization,	GO:0005576~extracellular region,GO:0005618~cell wall,GO:0005737~cytoplasm,GO:0009505~plant-type cell wall,GO:0009506~plasmodesma,GO:0009507~chloroplast,GO:0016020~membrane,GO:0048046~apoplast,	GO:0004553~hydrolase activity, hydrolyzing O-glycosyl compounds,GO:0016762~xyloglucan:xyloglucosyl transferase activity,GO:0016798~hydrolase activity, acting on glycosyl bonds,	IPR000757:Glycoside hydrolase, family 16,IPR008263:Glycoside hydrolase, family 16, active site,IPR008264:Beta-glucanase,IPR010713:Xyloglucan endo-transglycosylase, C-terminal,IPR013320:Concanavalin A-like lectin/glucanase, subgroup,IPR016455:Xyloglucan endotransglucosylase/hydrolase,		PIRSF005604:xyloglucan endotransglucosylase/hydrolase,		Apoplast,Cell wall,Cell wall biogenesis/degradation,Complete proteome,Disulfide bond,Glycoprotein,Glycosidase,Hydrolase,Reference proteome,Secreted,Signal,Transferase,	active site:Nucleophile,active site:Proton donor,chain:Xyloglucan endotransglucosylase/hydrolase protein 4,glycosylation site:N-linked (GlcNAc...),sequence conflict,signal peptide,
NODE_114258_length_1774_cov_4.161781	NP_001130490	67.816	9.86e-35	137	uncharacterized LOC100191588(LOC100191588)	Zea mays			GO:0016021~integral component of membrane,		IPR005016:TMS membrane protein/tumour differentially expressed protein,				Complete proteome,Membrane,Reference proteome,Signal,Transmembrane,Transmembrane helix,
NODE_114319_length_1975_cov_6.013165	NP_054969	89.286	8.04e-09	53.9	translation initiation factor 1(infA)	Spinacia oleracea			GO:0009507~chloroplast,	GO:0003743~translation initiation factor activity,GO:0019843~rRNA binding,GO:0043022~ribosome binding,	IPR004368:Translation initiation factor IF-1,IPR006196:RNA-binding domain, S1, IF1 type,IPR012340:Nucleic acid-binding, OB-fold,IPR022967:RNA-binding domain, S1,			SM00316:SM00316,	Chloroplast,Initiation factor,Plastid,Protein biosynthesis,RNA-binding,rRNA-binding,	chain:Translation initiation factor IF-1, chloroplastic,domain:S1-like,
NODE_114319_length_1975_cov_6.013165	NP_862788	89.286	2.04e-08	52.8	translation initiation factor 1(infA)	Calycanthus floridus var. glaucus			GO:0009507~chloroplast,	GO:0003743~translation initiation factor activity,GO:0019843~rRNA binding,GO:0043022~ribosome binding,	IPR004368:Translation initiation factor IF-1,IPR006196:RNA-binding domain, S1, IF1 type,IPR012340:Nucleic acid-binding, OB-fold,IPR022967:RNA-binding domain, S1,			SM00316:SM00316,	Chloroplast,Initiation factor,Plastid,Protein biosynthesis,RNA-binding,rRNA-binding,	chain:Translation initiation factor IF-1, chloroplastic,domain:S1-like,
NODE_114355_length_2770_cov_5.517690	NP_001326918	47.899	7.55e-29	121	RING/U-box superfamily protein(AT3G19950)	Arabidopsis thaliana		GO:0016567~protein ubiquitination,		GO:0008270~zinc ion binding,GO:0016874~ligase activity,	IPR001841:Zinc finger, RING-type,IPR013083:Zinc finger, RING/FYVE/PHD-type,			SM00184:RING,	Acetylation,Complete proteome,Ligase,Metal-binding,Reference proteome,Ubl conjugation,Ubl conjugation pathway,Zinc,Zinc-finger,
NODE_1144943_length_1134_cov_4.354497	NP_001236789	75	1.01e-12	66.6	uncharacterized LOC100305539(LOC100305539)	Glycine max				GO:0003676~nucleic acid binding,	IPR002775:DNA/RNA-binding protein Alba-like,				Complete proteome,Reference proteome,
NODE_114560_length_1961_cov_4.626721	NP_564700	48.913	2e-20	95.5	ferredoxin-fold anticodon-binding domain protein(AT1G55790)	Arabidopsis thaliana		GO:0030001~metal ion transport,GO:0070475~rRNA base methylation,	GO:0005634~nucleus,GO:0005737~cytoplasm,	GO:0046872~metal ion binding,GO:0070042~rRNA (uridine-N3-)-methyltransferase activity,	IPR006121:Heavy metal-associated domain, HMA,IPR019446:Domain of unknown function DUF2431,				Alternative splicing,Complete proteome,Lipoprotein,Metal-binding,Methylation,Prenylation,Reference proteome,
NODE_1145638_length_1009_cov_4.447968	NP_565868	80.645	2.9e-53	165	NAD(P)-binding Rossmann-fold superfamily protein(AT2G37660)	Arabidopsis thaliana		GO:0042742~defense response to bacterium,	GO:0009507~chloroplast,GO:0009570~chloroplast stroma,GO:0009579~thylakoid,GO:0048046~apoplast,	GO:0005507~copper ion binding,	IPR016040:NAD(P)-binding domain,				Acetylation,Chloroplast,Complete proteome,Plastid,Reference proteome,Transit peptide,	chain:Uncharacterized protein At2g37660, chloroplastic,modified residue,transit peptide:Chloroplast,
NODE_114604_length_1275_cov_6.330980	NP_001136688	68	6.45e-27	108	putative peptidyl-prolyl cis-trans isomerase family protein(LOC100216820)	Zea mays		GO:0006457~protein folding,	GO:0005768~endosome,GO:0005802~trans-Golgi network,GO:0016021~integral component of membrane,	GO:0003755~peptidyl-prolyl cis-trans isomerase activity,	IPR002130:Cyclophilin-like peptidyl-prolyl cis-trans isomerase domain,IPR020892:Cyclophilin-type peptidyl-prolyl cis-trans isomerase, conserved site,IPR024936:Cyclophilin-type peptidyl-prolyl cis-trans isomerase,		PIRSF001467:peptidyl-prolyl cis-trans isomerase,		Complete proteome,Isomerase,Membrane,Reference proteome,Rotamase,Signal,Transmembrane,Transmembrane helix,
NODE_11462_length_1279_cov_4.800625	NP_001144269	42.105	2.45e-08	57.4	uncharacterized LOC100277146(LOC100277146)	Zea mays									Complete proteome,Reference proteome,
NODE_1146683_length_1704_cov_4.764084	NP_001158969	67.925	9.97e-16	75.1	plastid-specific ribosomal protein 6(LOC100284517)	Zea mays		GO:0006412~translation,	GO:0005840~ribosome,GO:0009507~chloroplast,	GO:0003735~structural constituent of ribosome,GO:0019843~rRNA binding,	IPR020526:Ribosomal protein L6, chloroplast,				Complete proteome,Reference proteome,Ribonucleoprotein,Ribosomal protein,
NODE_114671_length_2152_cov_5.154740	NP_001235128	40.171	3.16e-09	59.7	uncharacterized LOC100527883(LOC100527883)	Glycine max			GO:0016021~integral component of membrane,		IPR003737:N-acetylglucosaminyl phosphatidylinositol deacetylase,IPR024078:Putative deacetylase LmbE-like domain,	gmx00563:Glycosylphosphatidylinositol(GPI)-anchor biosynthesis,gmx01100:Metabolic pathways,			Complete proteome,Membrane,Reference proteome,Transmembrane,Transmembrane helix,
NODE_242183_length_1588_cov_5.911839	NP_001235128	70.833	2.59e-08	40.8	uncharacterized LOC100527883(LOC100527883)	Glycine max			GO:0016021~integral component of membrane,		IPR003737:N-acetylglucosaminyl phosphatidylinositol deacetylase,IPR024078:Putative deacetylase LmbE-like domain,	gmx00563:Glycosylphosphatidylinositol(GPI)-anchor biosynthesis,gmx01100:Metabolic pathways,			Complete proteome,Membrane,Reference proteome,Transmembrane,Transmembrane helix,
NODE_1149314_length_1028_cov_5.773346	NP_001280970	56.452	3.3e-13	71.2	NAC transcription factor 25-like(NAC2)	Malus domestica		GO:0006351~transcription, DNA-templated,GO:0006355~regulation of transcription, DNA-templated,	GO:0005634~nucleus,	GO:0003677~DNA binding,	IPR003441:No apical meristem (NAM) protein,				DNA-binding,Nucleus,Transcription,Transcription regulation,
NODE_1151149_length_1006_cov_4.581511	NP_001106068	71.739	6.88e-14	73.9	heat shock complementing factor 1(hscf1)	Zea mays		GO:0006351~transcription, DNA-templated,GO:0007275~multicellular organism development,	GO:0005634~nucleus,	GO:0003677~DNA binding,GO:0003700~transcription factor activity, sequence-specific DNA binding,	IPR001471:AP2/ERF domain,IPR016177:DNA-binding, integrase-type,			SM00380:AP2,	Complete proteome,DNA-binding,Nucleus,Reference proteome,Transcription,Transcription regulation,
NODE_115358_length_1504_cov_4.435505	NP_174610	57.751	1.19e-106	332	Major facilitator superfamily protein(AT1G33440)	Arabidopsis thaliana		GO:0006810~transport,GO:0006857~oligopeptide transport,	GO:0005886~plasma membrane,GO:0016020~membrane,GO:0016021~integral component of membrane,	GO:0005215~transporter activity,	IPR000109:Proton-dependent oligopeptide transporter family,IPR020846:Major facilitator superfamily domain,				Complete proteome,Membrane,Phosphoprotein,Reference proteome,Transmembrane,Transmembrane helix,Transport,
NODE_1155133_length_1297_cov_4.690054	NP_001241968	57.031	8.97e-99	300	peroxidase 5-like(LOC100779031)	Glycine max		GO:0006979~response to oxidative stress,GO:0042744~hydrogen peroxide catabolic process,	GO:0005576~extracellular region,	GO:0004601~peroxidase activity,GO:0020037~heme binding,GO:0046872~metal ion binding,	IPR000823:Plant peroxidase,IPR002016:Haem peroxidase, plant/fungal/bacterial,IPR010255:Haem peroxidase,IPR019793:Peroxidases heam-ligand binding site,IPR019794:Peroxidase, active site,	gmx00940:Phenylpropanoid biosynthesis,gmx01100:Metabolic pathways,gmx01110:Biosynthesis of secondary metabolites,			Calcium,Disulfide bond,Heme,Hydrogen peroxide,Iron,Metal-binding,Oxidoreductase,Peroxidase,Secreted,Signal,
NODE_59263_length_2973_cov_5.051463	NP_001241968	48.175	2.14e-35	139	peroxidase 5-like(LOC100779031)	Glycine max		GO:0006979~response to oxidative stress,GO:0042744~hydrogen peroxide catabolic process,	GO:0005576~extracellular region,	GO:0004601~peroxidase activity,GO:0020037~heme binding,GO:0046872~metal ion binding,	IPR000823:Plant peroxidase,IPR002016:Haem peroxidase, plant/fungal/bacterial,IPR010255:Haem peroxidase,IPR019793:Peroxidases heam-ligand binding site,IPR019794:Peroxidase, active site,	gmx00940:Phenylpropanoid biosynthesis,gmx01100:Metabolic pathways,gmx01110:Biosynthesis of secondary metabolites,			Calcium,Disulfide bond,Heme,Hydrogen peroxide,Iron,Metal-binding,Oxidoreductase,Peroxidase,Secreted,Signal,
NODE_72837_length_1149_cov_5.920801	NP_001241968	50.602	6.46e-16	79.3	peroxidase 5-like(LOC100779031)	Glycine max		GO:0006979~response to oxidative stress,GO:0042744~hydrogen peroxide catabolic process,	GO:0005576~extracellular region,	GO:0004601~peroxidase activity,GO:0020037~heme binding,GO:0046872~metal ion binding,	IPR000823:Plant peroxidase,IPR002016:Haem peroxidase, plant/fungal/bacterial,IPR010255:Haem peroxidase,IPR019793:Peroxidases heam-ligand binding site,IPR019794:Peroxidase, active site,	gmx00940:Phenylpropanoid biosynthesis,gmx01100:Metabolic pathways,gmx01110:Biosynthesis of secondary metabolites,			Calcium,Disulfide bond,Heme,Hydrogen peroxide,Iron,Metal-binding,Oxidoreductase,Peroxidase,Secreted,Signal,
NODE_1155133_length_1297_cov_4.690054	NP_001148340	55.556	8.67e-93	285	peroxidase 1(LOC100281950)	Zea mays		GO:0006979~response to oxidative stress,GO:0042744~hydrogen peroxide catabolic process,	GO:0005576~extracellular region,	GO:0004601~peroxidase activity,GO:0020037~heme binding,GO:0046872~metal ion binding,	IPR000823:Plant peroxidase,IPR002016:Haem peroxidase, plant/fungal/bacterial,IPR010255:Haem peroxidase,IPR019793:Peroxidases heam-ligand binding site,IPR019794:Peroxidase, active site,	zma00940:Phenylpropanoid biosynthesis,zma01100:Metabolic pathways,zma01110:Biosynthesis of secondary metabolites,			Calcium,Disulfide bond,Heme,Hydrogen peroxide,Iron,Metal-binding,Oxidoreductase,Peroxidase,Secreted,Signal,
NODE_72837_length_1149_cov_5.920801	NP_001148340	60.656	4.32e-16	80.1	peroxidase 1(LOC100281950)	Zea mays		GO:0006979~response to oxidative stress,GO:0042744~hydrogen peroxide catabolic process,	GO:0005576~extracellular region,	GO:0004601~peroxidase activity,GO:0020037~heme binding,GO:0046872~metal ion binding,	IPR000823:Plant peroxidase,IPR002016:Haem peroxidase, plant/fungal/bacterial,IPR010255:Haem peroxidase,IPR019793:Peroxidases heam-ligand binding site,IPR019794:Peroxidase, active site,	zma00940:Phenylpropanoid biosynthesis,zma01100:Metabolic pathways,zma01110:Biosynthesis of secondary metabolites,			Calcium,Disulfide bond,Heme,Hydrogen peroxide,Iron,Metal-binding,Oxidoreductase,Peroxidase,Secreted,Signal,
NODE_1158085_length_2385_cov_4.537526	NP_001130359	55.455	1.28e-68	235	uncharacterized LOC100191454(LOC100191454)	Zea mays		GO:0005975~carbohydrate metabolic process,GO:0071555~cell wall organization,	GO:0005576~extracellular region,	GO:0004650~polygalacturonase activity,	IPR000743:Glycoside hydrolase, family 28,IPR006626:Parallel beta-helix repeat,IPR011050:Pectin lyase fold/virulence factor,IPR012334:Pectin lyase fold,			SM00710:PbH1,	Cell wall biogenesis/degradation,Complete proteome,Glycosidase,Hydrolase,Reference proteome,Secreted,Signal,
NODE_33592_length_1964_cov_5.091141	NP_001130359	65.517	7.01e-17	85.1	uncharacterized LOC100191454(LOC100191454)	Zea mays		GO:0005975~carbohydrate metabolic process,GO:0071555~cell wall organization,	GO:0005576~extracellular region,	GO:0004650~polygalacturonase activity,	IPR000743:Glycoside hydrolase, family 28,IPR006626:Parallel beta-helix repeat,IPR011050:Pectin lyase fold/virulence factor,IPR012334:Pectin lyase fold,			SM00710:PbH1,	Cell wall biogenesis/degradation,Complete proteome,Glycosidase,Hydrolase,Reference proteome,Secreted,Signal,
NODE_1158085_length_2385_cov_4.537526	NP_001274800	57.273	2.01e-64	224	probable polygalacturonase-like(LOC102580232)	Solanum tuberosum		GO:0005975~carbohydrate metabolic process,GO:0071555~cell wall organization,	GO:0005576~extracellular region,	GO:0004650~polygalacturonase activity,	IPR000743:Glycoside hydrolase, family 28,IPR006626:Parallel beta-helix repeat,IPR011050:Pectin lyase fold/virulence factor,IPR012334:Pectin lyase fold,			SM00710:PbH1,	Cell wall biogenesis/degradation,Glycosidase,Hydrolase,Secreted,
NODE_1162356_length_2247_cov_4.618157	NP_193129	88.722	9.44e-76	230	serine hydroxymethyltransferase 4(SHM4)	Arabidopsis thaliana		GO:0006544~glycine metabolic process,GO:0006563~L-serine metabolic process,GO:0007623~circadian rhythm,GO:0035999~tetrahydrofolate interconversion,GO:0046686~response to cadmium ion,	GO:0005737~cytoplasm,GO:0005829~cytosol,GO:0005886~plasma membrane,GO:0009506~plasmodesma,GO:0016020~membrane,	GO:0004372~glycine hydroxymethyltransferase activity,GO:0030170~pyridoxal phosphate binding,	IPR001085:Serine hydroxymethyltransferase,IPR015421:Pyridoxal phosphate-dependent transferase, major region, subdomain 1,IPR015422:Pyridoxal phosphate-dependent transferase, major region, subdomain 2,IPR015424:Pyridoxal phosphate-dependent transferase,IPR019798:Serine hydroxymethyltransferase, pyridoxal phosphate binding site,	ath00260:Glycine, serine and threonine metabolism,ath00460:Cyanoamino acid metabolism,ath00630:Glyoxylate and dicarboxylate metabolism,ath00670:One carbon pool by folate,ath01100:Metabolic pathways,ath01110:Biosynthesis of secondary metabolites,ath01130:Biosynthesis of antibiotics,ath01200:Carbon metabolism,ath01230:Biosynthesis of amino acids,	PIRSF000412:serine/glycine hydroxymethyltransferase,		Acetylation,Complete proteome,Cytoplasm,One-carbon metabolism,Pyridoxal phosphate,Reference proteome,Transferase,
NODE_1162445_length_1282_cov_5.570983	NP_001236928	79.487	3.03e-15	75.1	uncharacterized LOC100527756(LOC100527756)	Glycine max		GO:0006511~ubiquitin-dependent protein catabolic process,	GO:0005737~cytoplasm,	GO:0005524~ATP binding,GO:0031625~ubiquitin protein ligase binding,GO:0061630~ubiquitin protein ligase activity,	IPR000608:Ubiquitin-conjugating enzyme, E2,IPR016135:Ubiquitin-conjugating enzyme/RWD-like,IPR023313:Ubiquitin-conjugating enzyme, active site,	gmx04120:Ubiquitin mediated proteolysis,			ATP-binding,Complete proteome,Nucleotide-binding,Reference proteome,Ubl conjugation pathway,
NODE_1162445_length_1282_cov_5.570983	NP_001237311	86.486	6.16e-15	74.3	uncharacterized LOC100527526(LOC100527526)	Glycine max		GO:0006511~ubiquitin-dependent protein catabolic process,	GO:0005737~cytoplasm,	GO:0005524~ATP binding,GO:0031625~ubiquitin protein ligase binding,GO:0061630~ubiquitin protein ligase activity,	IPR000608:Ubiquitin-conjugating enzyme, E2,IPR016135:Ubiquitin-conjugating enzyme/RWD-like,IPR023313:Ubiquitin-conjugating enzyme, active site,	gmx04120:Ubiquitin mediated proteolysis,			ATP-binding,Complete proteome,Nucleotide-binding,Reference proteome,Ubl conjugation pathway,
NODE_1166983_length_1086_cov_4.291897	NP_001183889	66.038	1.02e-08	58.2	uncharacterized LOC100502482(LOC100502482)	Zea mays				GO:0016491~oxidoreductase activity,	IPR023753:Pyridine nucleotide-disulphide oxidoreductase, FAD/NAD(P)-binding domain,				Complete proteome,Reference proteome,
NODE_132920_length_2539_cov_5.073651	NP_001183889	41.758	1.67e-13	75.9	uncharacterized LOC100502482(LOC100502482)	Zea mays				GO:0016491~oxidoreductase activity,	IPR023753:Pyridine nucleotide-disulphide oxidoreductase, FAD/NAD(P)-binding domain,				Complete proteome,Reference proteome,
NODE_209977_length_2028_cov_4.340237	NP_001183889	53.333	2.03e-19	64.3	uncharacterized LOC100502482(LOC100502482)	Zea mays				GO:0016491~oxidoreductase activity,	IPR023753:Pyridine nucleotide-disulphide oxidoreductase, FAD/NAD(P)-binding domain,				Complete proteome,Reference proteome,
NODE_1166_length_3400_cov_4.798235	NP_001146689	71.3	2.03e-114	295	uncharacterized LOC100280289(pco109407)	Zea mays		GO:0015031~protein transport,	GO:0016021~integral component of membrane,		IPR002208:SecY/SEC61-alpha family,IPR019561:Translocon Sec61/SecY, plug domain,IPR023201:SecY subunit domain,	zma03060:Protein export,zma04141:Protein processing in endoplasmic reticulum,zma04145:Phagosome,	PIRSF004557:preprotein translocase Sec, SecY/Sec61-alpha subunit,		Complete proteome,Membrane,Reference proteome,Transmembrane,Transmembrane helix,
NODE_1166_length_3400_cov_4.798235	NP_001143980	77.041	8.83e-102	294	uncharacterized LOC100276798(LOC100276798)	Zea mays		GO:0015031~protein transport,	GO:0016021~integral component of membrane,		IPR002208:SecY/SEC61-alpha family,IPR019561:Translocon Sec61/SecY, plug domain,IPR023201:SecY subunit domain,	zma03060:Protein export,zma04141:Protein processing in endoplasmic reticulum,zma04145:Phagosome,	PIRSF004557:preprotein translocase Sec, SecY/Sec61-alpha subunit,		Complete proteome,Membrane,Reference proteome,Transmembrane,Transmembrane helix,
NODE_1167544_length_1121_cov_4.485281	NP_001237768	67.568	5.44e-07	52.4	TIR-NBS-LRR type disease resistance protein(LOC100499651)	Glycine max		GO:0007165~signal transduction,			IPR000157:Toll/interleukin-1 receptor homology (TIR) domain,			SM00255:TIR,	Complete proteome,Reference proteome,
NODE_116785_length_2242_cov_4.278323	NP_001307178	32.323	8.81e-09	60.5	protein EDS1(EDS1)	Solanum lycopersicum		GO:0006629~lipid metabolic process,		GO:0016787~hydrolase activity,	IPR002921:Lipase, class 3,	sly04626:Plant-pathogen interaction,			Complete proteome,Hydrolase,Reference proteome,
NODE_117122_length_1157_cov_4.176318	NP_001307178	40.486	1.17e-41	156	protein EDS1(EDS1)	Solanum lycopersicum		GO:0006629~lipid metabolic process,		GO:0016787~hydrolase activity,	IPR002921:Lipase, class 3,	sly04626:Plant-pathogen interaction,			Complete proteome,Hydrolase,Reference proteome,
NODE_141500_length_1090_cov_4.960550	NP_001307178	44.304	4.35e-48	173	protein EDS1(EDS1)	Solanum lycopersicum		GO:0006629~lipid metabolic process,		GO:0016787~hydrolase activity,	IPR002921:Lipase, class 3,	sly04626:Plant-pathogen interaction,			Complete proteome,Hydrolase,Reference proteome,
NODE_116827_length_5437_cov_5.311753	NP_187310	65.116	2.48e-21	101	Mevalonate/galactokinase family protein(GALK)	Arabidopsis thaliana	Carbohydrate transport and metabolism,	GO:0006012~galactose metabolic process,GO:0046835~carbohydrate phosphorylation,	GO:0005737~cytoplasm,GO:0005829~cytosol,	GO:0004335~galactokinase activity,GO:0005524~ATP binding,GO:0046872~metal ion binding,	IPR000705:Galactokinase,IPR006203:GHMP kinase, ATP-binding, conserved site,IPR006204:GHMP kinase N-terminal domain,IPR006206:Mevalonate/galactokinase,IPR013750:GHMP kinase, C-terminal domain,IPR014721:Ribosomal protein S5 domain 2-type fold, subgroup,IPR019539:Galactokinase galactose-binding domain,IPR019741:Galactokinase, conserved site,IPR020568:Ribosomal protein S5 domain 2-type fold,		PIRSF000530:galactokinase,		Acetylation,ATP-binding,Calcium,Carbohydrate metabolism,Complete proteome,Galactose metabolism,Kinase,Magnesium,Manganese,Metal-binding,Nucleotide-binding,Reference proteome,Transferase,	chain:Galactokinase,nucleotide phosphate-binding region:ATP,sequence conflict,
NODE_116827_length_5437_cov_5.311753	NP_001151320	61.111	1.82e-17	89.4	uncharacterized LOC100284953(pco060326)	Zea mays		GO:0006012~galactose metabolic process,	GO:0005737~cytoplasm,	GO:0004335~galactokinase activity,GO:0005524~ATP binding,	IPR000705:Galactokinase,IPR006203:GHMP kinase, ATP-binding, conserved site,IPR006204:GHMP kinase N-terminal domain,IPR006206:Mevalonate/galactokinase,IPR013750:GHMP kinase, C-terminal domain,IPR014721:Ribosomal protein S5 domain 2-type fold, subgroup,IPR019539:Galactokinase galactose-binding domain,IPR019741:Galactokinase, conserved site,IPR020568:Ribosomal protein S5 domain 2-type fold,		PIRSF000530:galactokinase,		Kinase,Transferase,
NODE_117042_length_2581_cov_4.779543	NP_001151568	59.864	1.32e-45	172	alpha-L-fucosidase 1(LOC100285202)	Zea mays		GO:0005975~carbohydrate metabolic process,		GO:0004560~alpha-L-fucosidase activity,	IPR000933:Glycoside hydrolase, family 29,IPR008979:Galactose-binding domain-like,IPR013781:Glycoside hydrolase, catalytic domain,IPR017853:Glycoside hydrolase, superfamily,	zma00511:Other glycan degradation,		SM00812:Alpha_L_fucos,	Complete proteome,Reference proteome,Signal,
NODE_237771_length_2994_cov_5.308951	NP_001151568	40.397	2.93e-21	99.8	alpha-L-fucosidase 1(LOC100285202)	Zea mays		GO:0005975~carbohydrate metabolic process,		GO:0004560~alpha-L-fucosidase activity,	IPR000933:Glycoside hydrolase, family 29,IPR008979:Galactose-binding domain-like,IPR013781:Glycoside hydrolase, catalytic domain,IPR017853:Glycoside hydrolase, superfamily,	zma00511:Other glycan degradation,		SM00812:Alpha_L_fucos,	Complete proteome,Reference proteome,Signal,
NODE_117383_length_2628_cov_5.212329	NP_001288469	63.333	1.42e-30	120	probable ADP-ribosylation factor GTPase-activating protein AGD11(LOC103636093)	Zea mays					IPR000008:C2 calcium-dependent membrane targeting,			SM00239:C2,	Complete proteome,Reference proteome,
NODE_117541_length_1701_cov_4.813639	NP_001236798	77.778	1.71e-13	75.1	embryo-specific urease(LOC547716)	Glycine max		GO:0043419~urea catabolic process,		GO:0009039~urease activity,GO:0016151~nickel cation binding,	IPR002019:Urease, beta subunit,IPR002026:Urease, gamma/gamma-beta subunit,IPR005848:Urease, alpha subunit,IPR006680:Amidohydrolase 1,IPR008221:Urease,IPR011059:Metal-dependent hydrolase, composite domain,IPR011612:Urease alpha-subunit, N-terminal,IPR017950:Urease, alpha subunit, conserved site,IPR017951:Urease, alpha subunit, C-terminal,	gmx00220:Arginine biosynthesis,gmx00230:Purine metabolism,gmx01100:Metabolic pathways,	PIRSF001222:urease,		Complete proteome,Hydrolase,Metal-binding,Nickel,Reference proteome,
NODE_11780_length_4638_cov_5.311772	NP_001183390	56.061	5.88e-12	72	uncharacterized LOC100501806(LOC100501806)	Zea mays			GO:0016021~integral component of membrane,	GO:0042578~phosphoric ester hydrolase activity,	IPR002013:Synaptojanin, N-terminal,				Membrane,Transmembrane,Transmembrane helix,
NODE_118029_length_1405_cov_4.311032	NP_001242449	78.723	9.44e-31	77.8	autophagy-related protein 101-like(LOC100811916)	Glycine max		GO:0006914~autophagy,			IPR012445:Autophagy-related protein 1010,
NODE_118029_length_1405_cov_4.311032	NP_001242449	61.404	9.44e-31	76.3	autophagy-related protein 101-like(LOC100811916)	Glycine max		GO:0006914~autophagy,			IPR012445:Autophagy-related protein 1010,
NODE_83938_length_1471_cov_4.543848	NP_001242449	88.462	6.06e-07	51.6	autophagy-related protein 101-like(LOC100811916)	Glycine max		GO:0006914~autophagy,			IPR012445:Autophagy-related protein 1010,
NODE_118500_length_1186_cov_5.833896	NP_001268130	59.524	2.42e-08	57	CBL-interacting serine/threonine-protein kinase 8-like(CIPK17)	Vitis vinifera		GO:0006468~protein phosphorylation,GO:0007165~signal transduction,GO:0010167~response to nitrate,GO:0035556~intracellular signal transduction,GO:0046777~protein autophosphorylation,GO:0048364~root development,	GO:0005634~nucleus,GO:0005737~cytoplasm,GO:0005886~plasma membrane,	GO:0004674~protein serine/threonine kinase activity,GO:0005524~ATP binding,	IPR000719:Protein kinase, catalytic domain,IPR004041:NAF domain,IPR008271:Serine/threonine-protein kinase, active site,IPR011009:Protein kinase-like domain,IPR017441:Protein kinase, ATP binding site,IPR018451:NAF/FISL domain,			SM00220:S_TKc,	ATP-binding,Complete proteome,Kinase,Nucleotide-binding,Reference proteome,Serine/threonine-protein kinase,Transferase,
NODE_1187570_length_1001_cov_4.071928	NP_001141080	48.148	1.47e-11	64.7	uncharacterized LOC100273162(pco085810)	Zea mays					IPR007612:LURP1-like domain,IPR025659:Tubby C-terminal-like domain,				Complete proteome,Reference proteome,
NODE_1190561_length_2676_cov_4.377803	NP_178338	48.276	6.52e-18	87	phloem protein 2-B7(PP2-B7)	Arabidopsis thaliana			GO:0005634~nucleus,	GO:0030246~carbohydrate binding,	IPR001810:F-box domain, cyclin-like,IPR025886:Phloem protein 2-like,			SM00256:FBOX,	Complete proteome,Reference proteome,	chain:F-box protein PP2-B7,domain:F-box,sequence conflict,
NODE_119225_length_3060_cov_12.328105	NP_001241269	76.744	1.46e-13	74.7	1,4-Dihydroxy-2-naphthoyl-CoA synthase, peroxisomal-like(LOC100807101)	Glycine max		GO:0009234~menaquinone biosynthetic process,GO:0042372~phylloquinone biosynthetic process,	GO:0005777~peroxisome,	GO:0008935~1,4-dihydroxy-2-naphthoyl-CoA synthase activity,	IPR001753:Crotonase superfamily,IPR010198:Naphthoate synthase,IPR014748:Crontonase, C-terminal,IPR018376:Enoyl-CoA hydratase/isomerase, conserved site,	gmx00130:Ubiquinone and other terpenoid-quinone biosynthesis,gmx01100:Metabolic pathways,gmx01110:Biosynthesis of secondary metabolites,			Complete proteome,Reference proteome,
NODE_11949_length_1410_cov_4.531206	NP_174430	39.669	2.62e-16	82.4	Eukaryotic aspartyl protease family protein(AT1G31450)	Arabidopsis thaliana		GO:0006508~proteolysis,GO:0030163~protein catabolic process,	GO:0005576~extracellular region,	GO:0004190~aspartic-type endopeptidase activity,	IPR001461:Peptidase A1,IPR001969:Peptidase aspartic, active site,IPR021109:Aspartic peptidase,				Aspartyl protease,Complete proteome,Hydrolase,Protease,Reference proteome,Signal,
NODE_11949_length_1410_cov_4.531206	NP_198319	42.609	4.86e-16	81.6	Eukaryotic aspartyl protease family protein(CDR1)	Arabidopsis thaliana		GO:0006508~proteolysis,GO:0010310~regulation of hydrogen peroxide metabolic process,GO:0010337~regulation of salicylic acid metabolic process,GO:0030163~protein catabolic process,GO:0042742~defense response to bacterium,	GO:0005576~extracellular region,GO:0048046~apoplast,	GO:0004190~aspartic-type endopeptidase activity,	IPR001461:Peptidase A1,IPR001969:Peptidase aspartic, active site,IPR021109:Aspartic peptidase,				Apoplast,Aspartyl protease,Complete proteome,Glycoprotein,Hydrolase,Plant defense,Protease,Reference proteome,Secreted,Signal,Zymogen,
NODE_481401_length_1695_cov_5.364012	NP_198319	43.841	2.13e-54	192	Eukaryotic aspartyl protease family protein(CDR1)	Arabidopsis thaliana		GO:0006508~proteolysis,GO:0010310~regulation of hydrogen peroxide metabolic process,GO:0010337~regulation of salicylic acid metabolic process,GO:0030163~protein catabolic process,GO:0042742~defense response to bacterium,	GO:0005576~extracellular region,GO:0048046~apoplast,	GO:0004190~aspartic-type endopeptidase activity,	IPR001461:Peptidase A1,IPR001969:Peptidase aspartic, active site,IPR021109:Aspartic peptidase,				Apoplast,Aspartyl protease,Complete proteome,Glycoprotein,Hydrolase,Plant defense,Protease,Reference proteome,Secreted,Signal,Zymogen,
NODE_8463_length_1492_cov_4.197721	NP_198319	37.019	1.71e-30	124	Eukaryotic aspartyl protease family protein(CDR1)	Arabidopsis thaliana		GO:0006508~proteolysis,GO:0010310~regulation of hydrogen peroxide metabolic process,GO:0010337~regulation of salicylic acid metabolic process,GO:0030163~protein catabolic process,GO:0042742~defense response to bacterium,	GO:0005576~extracellular region,GO:0048046~apoplast,	GO:0004190~aspartic-type endopeptidase activity,	IPR001461:Peptidase A1,IPR001969:Peptidase aspartic, active site,IPR021109:Aspartic peptidase,				Apoplast,Aspartyl protease,Complete proteome,Glycoprotein,Hydrolase,Plant defense,Protease,Reference proteome,Secreted,Signal,Zymogen,
NODE_87855_length_1774_cov_4.972942	NP_198319	37.83	1.01e-40	154	Eukaryotic aspartyl protease family protein(CDR1)	Arabidopsis thaliana		GO:0006508~proteolysis,GO:0010310~regulation of hydrogen peroxide metabolic process,GO:0010337~regulation of salicylic acid metabolic process,GO:0030163~protein catabolic process,GO:0042742~defense response to bacterium,	GO:0005576~extracellular region,GO:0048046~apoplast,	GO:0004190~aspartic-type endopeptidase activity,	IPR001461:Peptidase A1,IPR001969:Peptidase aspartic, active site,IPR021109:Aspartic peptidase,				Apoplast,Aspartyl protease,Complete proteome,Glycoprotein,Hydrolase,Plant defense,Protease,Reference proteome,Secreted,Signal,Zymogen,
NODE_119553_length_2794_cov_5.147459	NP_001169438	60.274	2.81e-16	83.2	uncharacterized LOC100383309(LOC100383309)	Zea mays				GO:0003677~DNA binding,	IPR017877:Myb-like domain,				Coiled coil,Complete proteome,Reference proteome,
NODE_119858_length_1568_cov_4.156888	NP_001304080	55.172	8.17e-10	62.8	glycoprotein 3-alpha-L-fucosyltransferase A(LOC106768760)	Vigna radiata		GO:0006486~protein glycosylation,	GO:0016021~integral component of membrane,GO:0032580~Golgi cisterna membrane,	GO:0008417~fucosyltransferase activity,	IPR001503:Glycosyl transferase, family 10,				Glycosyltransferase,Golgi apparatus,Membrane,Transferase,Transmembrane,
NODE_119860_length_1584_cov_4.933081	NP_188661	50.515	5.56e-15	78.6	DUF1666 family protein (DUF1666)(AT3G20260)	Arabidopsis thaliana		GO:0006412~translation,GO:0042254~ribosome biogenesis,	GO:0005634~nucleus,GO:0022625~cytosolic large ribosomal subunit,	GO:0003723~RNA binding,GO:0003735~structural constituent of ribosome,	IPR008195:Ribosomal protein L34Ae,IPR012870:Protein of unknown function DUF1666,				Complete proteome,Reference proteome,
NODE_120305_length_2397_cov_4.959950	NP_176681	39.048	1.37e-10	66.6	WEB family protein (DUF827)(AT1G65010)	Arabidopsis thaliana		GO:0007131~reciprocal meiotic recombination,GO:0009908~flower development,	GO:0000795~synaptonemal complex,GO:0005634~nucleus,GO:0005875~microtubule associated complex,GO:0009507~chloroplast,						Chloroplast,Coiled coil,Complete proteome,Phosphoprotein,Plastid,Reference proteome,Transit peptide,
NODE_120305_length_2397_cov_4.959950	NP_001303160	56.364	3.13e-10	65.1	boron transporter 1(LOC106396896)	Brassica napus			GO:0016021~integral component of membrane,	GO:0005452~inorganic anion exchanger activity,	IPR003020:Bicarbonate transporter, eukaryotic,IPR011531:Bicarbonate transporter, C-terminal,				Membrane,Transmembrane,Transmembrane helix,
NODE_120308_length_1001_cov_4.865135	NP_177638	45.455	1.85e-29	120	GTP binding protein(ARC3)	Arabidopsis thaliana	Function unknown,	GO:0010020~chloroplast fission,	GO:0009570~chloroplast stroma,GO:0009707~chloroplast outer membrane,GO:0035452~extrinsic component of plastid membrane,	GO:0003924~GTPase activity,GO:0005515~protein binding,GO:0043621~protein self-association,	IPR003008:Tubulin/FtsZ, GTPase domain,IPR003409:MORN motif,			SM00698:MORN,	Chloroplast,Coiled coil,Complete proteome,Membrane,Plastid,Plastid outer membrane,Reference proteome,Repeat,Transit peptide,
NODE_511471_length_1275_cov_4.538039	NP_177638	77.193	4.25e-21	97.4	GTP binding protein(ARC3)	Arabidopsis thaliana	Function unknown,	GO:0010020~chloroplast fission,	GO:0009570~chloroplast stroma,GO:0009707~chloroplast outer membrane,GO:0035452~extrinsic component of plastid membrane,	GO:0003924~GTPase activity,GO:0005515~protein binding,GO:0043621~protein self-association,	IPR003008:Tubulin/FtsZ, GTPase domain,IPR003409:MORN motif,			SM00698:MORN,	Chloroplast,Coiled coil,Complete proteome,Membrane,Plastid,Plastid outer membrane,Reference proteome,Repeat,Transit peptide,
NODE_120422_length_1065_cov_4.423474	NP_001316428	75	1.94e-10	63.5	CLPTM1-like membrane protein cnrB(LOC100381598)	Zea mays			GO:0016021~integral component of membrane,		IPR008429:Cleft lip and palate transmembrane 1,
NODE_456257_length_1152_cov_4.632812	NP_001316428	79.268	4.53e-34	134	CLPTM1-like membrane protein cnrB(LOC100381598)	Zea mays			GO:0016021~integral component of membrane,		IPR008429:Cleft lip and palate transmembrane 1,
NODE_721543_length_1347_cov_4.750557	NP_001316428	78.205	5.04e-34	135	CLPTM1-like membrane protein cnrB(LOC100381598)	Zea mays			GO:0016021~integral component of membrane,		IPR008429:Cleft lip and palate transmembrane 1,
NODE_782745_length_1081_cov_5.010176	NP_001316428	60.55	5.91e-34	134	CLPTM1-like membrane protein cnrB(LOC100381598)	Zea mays			GO:0016021~integral component of membrane,		IPR008429:Cleft lip and palate transmembrane 1,
NODE_120451_length_2569_cov_4.306345	NP_001307929	43.204	7.59e-71	165	ent-kaurene synthase(TPS24)	Solanum lycopersicum		GO:0008152~metabolic process,GO:0009686~gibberellin biosynthetic process,	GO:0009570~chloroplast stroma,	GO:0000287~magnesium ion binding,GO:0009899~ent-kaurene synthase activity,GO:0010333~terpene synthase activity,	IPR001906:Terpene synthase, N-terminal domain,IPR005630:Terpene synthase, metal-binding domain,IPR008930:Terpenoid cyclases/protein prenyltransferase alpha-alpha toroid,IPR008949:Terpenoid synthase,	sly00904:Diterpenoid biosynthesis,sly01100:Metabolic pathways,sly01110:Biosynthesis of secondary metabolites,			Complete proteome,Magnesium,Metal-binding,Reference proteome,
NODE_1205471_length_1255_cov_4.611952	NP_001169048	77.586	2.22e-19	92.4	uncharacterized LOC100382888(si683027d02(142))	Zea mays		GO:0009102~biotin biosynthetic process,		GO:0000287~magnesium ion binding,GO:0004141~dethiobiotin synthase activity,GO:0005524~ATP binding,GO:0008483~transaminase activity,GO:0030170~pyridoxal phosphate binding,	IPR004472:Dethiobiotin synthase BioD,IPR005814:Aminotransferase class-III,IPR015421:Pyridoxal phosphate-dependent transferase, major region, subdomain 1,IPR015422:Pyridoxal phosphate-dependent transferase, major region, subdomain 2,IPR015424:Pyridoxal phosphate-dependent transferase,IPR027417:P-loop containing nucleoside triphosphate hydrolase,	zma00780:Biotin metabolism,zma01100:Metabolic pathways,			Aminotransferase,Complete proteome,Reference proteome,Transferase,
NODE_86762_length_1335_cov_5.268914	NP_001169048	52.5	6.55e-20	94.4	uncharacterized LOC100382888(si683027d02(142))	Zea mays		GO:0009102~biotin biosynthetic process,		GO:0000287~magnesium ion binding,GO:0004141~dethiobiotin synthase activity,GO:0005524~ATP binding,GO:0008483~transaminase activity,GO:0030170~pyridoxal phosphate binding,	IPR004472:Dethiobiotin synthase BioD,IPR005814:Aminotransferase class-III,IPR015421:Pyridoxal phosphate-dependent transferase, major region, subdomain 1,IPR015422:Pyridoxal phosphate-dependent transferase, major region, subdomain 2,IPR015424:Pyridoxal phosphate-dependent transferase,IPR027417:P-loop containing nucleoside triphosphate hydrolase,	zma00780:Biotin metabolism,zma01100:Metabolic pathways,			Aminotransferase,Complete proteome,Reference proteome,Transferase,
NODE_1210210_length_1024_cov_4.573242	NP_567238	67.308	8.76e-21	87.8	AAA-type ATPase family protein(AT4G02480)	Arabidopsis thaliana			GO:0005634~nucleus,GO:0009507~chloroplast,	GO:0005524~ATP binding,GO:0016887~ATPase activity,	IPR000253:Forkhead-associated (FHA) domain,IPR003593:AAA+ ATPase domain,IPR003959:ATPase, AAA-type, core,IPR003960:ATPase, AAA-type, conserved site,IPR008984:SMAD/FHA domain,IPR027417:P-loop containing nucleoside triphosphate hydrolase,			SM00382:AAA,	Complete proteome,Reference proteome,
NODE_488574_length_2054_cov_4.403603	NP_567238	81.579	1.46e-11	69.7	AAA-type ATPase family protein(AT4G02480)	Arabidopsis thaliana			GO:0005634~nucleus,GO:0009507~chloroplast,	GO:0005524~ATP binding,GO:0016887~ATPase activity,	IPR000253:Forkhead-associated (FHA) domain,IPR003593:AAA+ ATPase domain,IPR003959:ATPase, AAA-type, core,IPR003960:ATPase, AAA-type, conserved site,IPR008984:SMAD/FHA domain,IPR027417:P-loop containing nucleoside triphosphate hydrolase,			SM00382:AAA,	Complete proteome,Reference proteome,
NODE_1213453_length_1122_cov_4.995543	NP_178674	93.617	1.54e-19	92	binding protein(ELF8)	Arabidopsis thaliana		GO:0006351~transcription, DNA-templated,GO:0009908~flower development,GO:0009910~negative regulation of flower development,GO:0016571~histone methylation,GO:0045893~positive regulation of transcription, DNA-templated,GO:0051569~regulation of histone H3-K4 methylation,	GO:0005634~nucleus,GO:0016020~membrane,GO:0016593~Cdc73/Paf1 complex,	GO:0000993~RNA polymerase II core binding,	IPR011990:Tetratricopeptide-like helical,IPR013026:Tetratricopeptide repeat-containing domain,IPR019734:Tetratricopeptide repeat,			SM00028:TPR,	Acetylation,Complete proteome,Flowering,Nucleus,Reference proteome,Repeat,TPR repeat,Transcription,Transcription regulation,
NODE_658463_length_991_cov_3.724521	NP_178674	52.239	1.58e-13	73.2	binding protein(ELF8)	Arabidopsis thaliana		GO:0006351~transcription, DNA-templated,GO:0009908~flower development,GO:0009910~negative regulation of flower development,GO:0016571~histone methylation,GO:0045893~positive regulation of transcription, DNA-templated,GO:0051569~regulation of histone H3-K4 methylation,	GO:0005634~nucleus,GO:0016020~membrane,GO:0016593~Cdc73/Paf1 complex,	GO:0000993~RNA polymerase II core binding,	IPR011990:Tetratricopeptide-like helical,IPR013026:Tetratricopeptide repeat-containing domain,IPR019734:Tetratricopeptide repeat,			SM00028:TPR,	Acetylation,Complete proteome,Flowering,Nucleus,Reference proteome,Repeat,TPR repeat,Transcription,Transcription regulation,
NODE_658463_length_991_cov_3.724521	NP_178674	58.824	4.16e-06	50.1	binding protein(ELF8)	Arabidopsis thaliana		GO:0006351~transcription, DNA-templated,GO:0009908~flower development,GO:0009910~negative regulation of flower development,GO:0016571~histone methylation,GO:0045893~positive regulation of transcription, DNA-templated,GO:0051569~regulation of histone H3-K4 methylation,	GO:0005634~nucleus,GO:0016020~membrane,GO:0016593~Cdc73/Paf1 complex,	GO:0000993~RNA polymerase II core binding,	IPR011990:Tetratricopeptide-like helical,IPR013026:Tetratricopeptide repeat-containing domain,IPR019734:Tetratricopeptide repeat,			SM00028:TPR,	Acetylation,Complete proteome,Flowering,Nucleus,Reference proteome,Repeat,TPR repeat,Transcription,Transcription regulation,
NODE_743991_length_1143_cov_5.145232	NP_178674	83.582	9.06e-31	125	binding protein(ELF8)	Arabidopsis thaliana		GO:0006351~transcription, DNA-templated,GO:0009908~flower development,GO:0009910~negative regulation of flower development,GO:0016571~histone methylation,GO:0045893~positive regulation of transcription, DNA-templated,GO:0051569~regulation of histone H3-K4 methylation,	GO:0005634~nucleus,GO:0016020~membrane,GO:0016593~Cdc73/Paf1 complex,	GO:0000993~RNA polymerase II core binding,	IPR011990:Tetratricopeptide-like helical,IPR013026:Tetratricopeptide repeat-containing domain,IPR019734:Tetratricopeptide repeat,			SM00028:TPR,	Acetylation,Complete proteome,Flowering,Nucleus,Reference proteome,Repeat,TPR repeat,Transcription,Transcription regulation,
NODE_743991_length_1143_cov_5.145232	NP_178674	79.412	2.04e-08	57.8	binding protein(ELF8)	Arabidopsis thaliana		GO:0006351~transcription, DNA-templated,GO:0009908~flower development,GO:0009910~negative regulation of flower development,GO:0016571~histone methylation,GO:0045893~positive regulation of transcription, DNA-templated,GO:0051569~regulation of histone H3-K4 methylation,	GO:0005634~nucleus,GO:0016020~membrane,GO:0016593~Cdc73/Paf1 complex,	GO:0000993~RNA polymerase II core binding,	IPR011990:Tetratricopeptide-like helical,IPR013026:Tetratricopeptide repeat-containing domain,IPR019734:Tetratricopeptide repeat,			SM00028:TPR,	Acetylation,Complete proteome,Flowering,Nucleus,Reference proteome,Repeat,TPR repeat,Transcription,Transcription regulation,
NODE_1215837_length_1706_cov_5.308910	NP_193561	52.381	1.05e-13	75.1	translocase 11(TRANS11)	Arabidopsis thaliana		GO:0006486~protein glycosylation,GO:0006629~lipid metabolic process,	GO:0005886~plasma membrane,GO:0016020~membrane,GO:0016021~integral component of membrane,	GO:0003824~catalytic activity,GO:0008963~phospho-N-acetylmuramoyl-pentapeptide-transferase activity,GO:0015450~P-P-bond-hydrolysis-driven protein transmembrane transporter activity,	IPR000715:Glycosyl transferase, family 4,IPR003524:Phospho-N-acetylmuramoyl-pentapeptide transferase,IPR018480:Phospho-N-acetylmuramoyl-pentapeptide transferase, conserved site,				Alternative splicing,Complete proteome,Membrane,Reference proteome,Transferase,Transmembrane,Transmembrane helix,	chain:Phospho-N-acetylmuramoyl-pentapeptide- transferase homolog,compositionally biased region:Poly-Leu,sequence conflict,splice variant,transmembrane region,
NODE_1218818_length_975_cov_4.505641	NP_189000	78.947	2.79e-22	97.1	ribonucleotide reductase 2A(RNR2A)	Arabidopsis thaliana		GO:0006260~DNA replication,GO:0006281~DNA repair,GO:0007275~multicellular organism development,GO:0009186~deoxyribonucleoside diphosphate metabolic process,GO:0009259~ribonucleotide metabolic process,GO:0009263~deoxyribonucleotide biosynthetic process,GO:0051726~regulation of cell cycle,GO:0055114~oxidation-reduction process,	GO:0005737~cytoplasm,GO:0005829~cytosol,GO:0005971~ribonucleoside-diphosphate reductase complex,	GO:0004748~ribonucleoside-diphosphate reductase activity, thioredoxin disulfide as acceptor,GO:0046872~metal ion binding,	IPR000358:Ribonucleotide reductase small subunit,IPR009078:Ferritin-like superfamily,IPR012348:Ribonucleotide reductase-related,	ath00230:Purine metabolism,ath00240:Pyrimidine metabolism,ath00480:Glutathione metabolism,ath01100:Metabolic pathways,	PIRSF000355:ribonucleoside-diphosphate reductase, beta subunit,		Complete proteome,Cytoplasm,DNA replication,Iron,Metal-binding,Oxidoreductase,Reference proteome,	chain:Ribonucleoside-diphosphate reductase small chain A,metal ion-binding site:Iron 1,metal ion-binding site:Iron 2,sequence conflict,
NODE_122130_length_1054_cov_4.073055	NP_001281248	54.348	1.6e-10	59.7	hypothetical protein(LOC101202700)	Zea mays									Complete proteome,Reference proteome,
NODE_1222727_length_1185_cov_5.181435	NP_850271	83.333	1.23e-54	124	glucan synthase-like 8(GSL8)	Arabidopsis thaliana		GO:0006075~(1->3)-beta-D-glucan biosynthetic process,GO:0008360~regulation of cell shape,GO:0009555~pollen development,GO:0009556~microsporogenesis,GO:0048589~developmental growth,GO:0071555~cell wall organization,	GO:0000148~1,3-beta-D-glucan synthase complex,GO:0005794~Golgi apparatus,GO:0005886~plasma membrane,GO:0009506~plasmodesma,GO:0016021~integral component of membrane,	GO:0003843~1,3-beta-D-glucan synthase activity,GO:0016757~transferase activity, transferring glycosyl groups,	IPR003440:Glycosyl transferase, family 48,IPR026899:1,3-beta-glucan synthase subunit FKS1-like, domain-1,			SM01205:SM01205,	Cell membrane,Cell shape,Cell wall biogenesis/degradation,Complete proteome,Glycosyltransferase,Leucine-rich repeat,Membrane,Reference proteome,Repeat,Transferase,Transmembrane,Transmembrane helix,	chain:Callose synthase 10,sequence conflict,transmembrane region,
NODE_880767_length_1757_cov_4.804781	NP_850271	63.918	4.3e-27	119	glucan synthase-like 8(GSL8)	Arabidopsis thaliana		GO:0006075~(1->3)-beta-D-glucan biosynthetic process,GO:0008360~regulation of cell shape,GO:0009555~pollen development,GO:0009556~microsporogenesis,GO:0048589~developmental growth,GO:0071555~cell wall organization,	GO:0000148~1,3-beta-D-glucan synthase complex,GO:0005794~Golgi apparatus,GO:0005886~plasma membrane,GO:0009506~plasmodesma,GO:0016021~integral component of membrane,	GO:0003843~1,3-beta-D-glucan synthase activity,GO:0016757~transferase activity, transferring glycosyl groups,	IPR003440:Glycosyl transferase, family 48,IPR026899:1,3-beta-glucan synthase subunit FKS1-like, domain-1,			SM01205:SM01205,	Cell membrane,Cell shape,Cell wall biogenesis/degradation,Complete proteome,Glycosyltransferase,Leucine-rich repeat,Membrane,Reference proteome,Repeat,Transferase,Transmembrane,Transmembrane helix,	chain:Callose synthase 10,sequence conflict,transmembrane region,
NODE_1222727_length_1185_cov_5.181435	NP_187372	80.303	2.75e-52	120	glucan synthase-like 10(GSL10)	Arabidopsis thaliana		GO:0006075~(1->3)-beta-D-glucan biosynthetic process,GO:0008360~regulation of cell shape,GO:0009555~pollen development,GO:0009556~microsporogenesis,GO:0009846~pollen germination,GO:0048589~developmental growth,GO:0052543~callose deposition in cell wall,GO:0055047~generative cell mitosis,GO:0071555~cell wall organization,GO:0080092~regulation of pollen tube growth,	GO:0000148~1,3-beta-D-glucan synthase complex,GO:0005794~Golgi apparatus,GO:0005886~plasma membrane,GO:0016021~integral component of membrane,	GO:0003843~1,3-beta-D-glucan synthase activity,	IPR003440:Glycosyl transferase, family 48,IPR026899:1,3-beta-glucan synthase subunit FKS1-like, domain-1,			SM01205:SM01205,	Cell membrane,Cell shape,Cell wall biogenesis/degradation,Complete proteome,Glycosyltransferase,Membrane,Reference proteome,Transferase,Transmembrane,Transmembrane helix,	chain:Callose synthase 9,sequence conflict,topological domain:Cytoplasmic,topological domain:Extracellular,transmembrane region,
NODE_880767_length_1757_cov_4.804781	NP_187372	57.732	1.48e-21	101	glucan synthase-like 10(GSL10)	Arabidopsis thaliana		GO:0006075~(1->3)-beta-D-glucan biosynthetic process,GO:0008360~regulation of cell shape,GO:0009555~pollen development,GO:0009556~microsporogenesis,GO:0009846~pollen germination,GO:0048589~developmental growth,GO:0052543~callose deposition in cell wall,GO:0055047~generative cell mitosis,GO:0071555~cell wall organization,GO:0080092~regulation of pollen tube growth,	GO:0000148~1,3-beta-D-glucan synthase complex,GO:0005794~Golgi apparatus,GO:0005886~plasma membrane,GO:0016021~integral component of membrane,	GO:0003843~1,3-beta-D-glucan synthase activity,	IPR003440:Glycosyl transferase, family 48,IPR026899:1,3-beta-glucan synthase subunit FKS1-like, domain-1,			SM01205:SM01205,	Cell membrane,Cell shape,Cell wall biogenesis/degradation,Complete proteome,Glycosyltransferase,Membrane,Reference proteome,Transferase,Transmembrane,Transmembrane helix,	chain:Callose synthase 9,sequence conflict,topological domain:Cytoplasmic,topological domain:Extracellular,transmembrane region,
NODE_122370_length_1177_cov_6.807986	NP_001236179	42.353	2.9e-32	129	cytochrome P450 CYP82C1(CYP82C1)	Glycine max			GO:0016021~integral component of membrane,	GO:0004497~monooxygenase activity,GO:0005506~iron ion binding,GO:0016705~oxidoreductase activity, acting on paired donors, with incorporation or reduction of molecular oxygen,GO:0020037~heme binding,	IPR001128:Cytochrome P450,IPR002401:Cytochrome P450, E-class, group I,IPR017972:Cytochrome P450, conserved site,				Heme,Iron,Membrane,Metal-binding,Monooxygenase,Oxidoreductase,Transmembrane,Transmembrane helix,
NODE_1223935_length_1034_cov_4.199226	NP_178511	82.609	1.76e-49	124	Magnesium transporter CorA-like family protein(AT2G04305)	Arabidopsis thaliana		GO:0030001~metal ion transport,GO:0098655~cation transmembrane transport,	GO:0005886~plasma membrane,GO:0016020~membrane,GO:0016021~integral component of membrane,	GO:0046873~metal ion transmembrane transporter activity,	IPR002523:Mg2+ transporter protein, CorA-like/Zinc transport protein ZntB,				Coiled coil,Complete proteome,Membrane,Reference proteome,Transmembrane,Transmembrane helix,
NODE_1223935_length_1034_cov_4.199226	NP_178511	46.988	1.76e-49	57	Magnesium transporter CorA-like family protein(AT2G04305)	Arabidopsis thaliana		GO:0030001~metal ion transport,GO:0098655~cation transmembrane transport,	GO:0005886~plasma membrane,GO:0016020~membrane,GO:0016021~integral component of membrane,	GO:0046873~metal ion transmembrane transporter activity,	IPR002523:Mg2+ transporter protein, CorA-like/Zinc transport protein ZntB,				Coiled coil,Complete proteome,Membrane,Reference proteome,Transmembrane,Transmembrane helix,
NODE_1223935_length_1034_cov_4.199226	NP_178511	65.789	1.76e-49	55.1	Magnesium transporter CorA-like family protein(AT2G04305)	Arabidopsis thaliana		GO:0030001~metal ion transport,GO:0098655~cation transmembrane transport,	GO:0005886~plasma membrane,GO:0016020~membrane,GO:0016021~integral component of membrane,	GO:0046873~metal ion transmembrane transporter activity,	IPR002523:Mg2+ transporter protein, CorA-like/Zinc transport protein ZntB,				Coiled coil,Complete proteome,Membrane,Reference proteome,Transmembrane,Transmembrane helix,
NODE_1238657_length_1488_cov_4.719086	NP_567109	77.647	4.58e-35	137	COP9 signalosome complex subunit 1(FUS6)	Arabidopsis thaliana	Posttranslational modification, protein turnover, chaperones,	GO:0000338~protein deneddylation,GO:0006461~protein complex assembly,GO:0006972~hyperosmotic response,GO:0009585~red, far-red light phototransduction,GO:0009640~photomorphogenesis,GO:0009646~response to absence of light,GO:0009651~response to salt stress,GO:0009793~embryo development ending in seed dormancy,GO:0010387~COP9 signalosome assembly,GO:0010388~cullin deneddylation,	GO:0005634~nucleus,GO:0005829~cytosol,GO:0008180~COP9 signalosome,	GO:0005515~protein binding,	IPR000717:Proteasome component (PCI) domain,IPR011991:Winged helix-turn-helix DNA-binding domain,IPR019585:26S proteasome, regulatory subunit Rpn7,			SM00088:PINT,	3D-structure,Complete proteome,Cytoplasm,Developmental protein,Nucleus,Phytochrome signaling pathway,Reference proteome,Signalosome,	chain:COP9 signalosome complex subunit 1,domain:PCI,mutagenesis site,sequence conflict,
NODE_1239224_length_1173_cov_4.937767	NP_001234998	54.762	7.47e-22	76.3	uncharacterized LOC100306179(LOC100306179)	Glycine max		GO:0055114~oxidation-reduction process,	GO:0016021~integral component of membrane,		IPR006593:Cytochrome b561/ferric reductase transmembrane,			SM00665:B561,	Electron transport,Membrane,Transmembrane,Transmembrane helix,Transport,
NODE_1239224_length_1173_cov_4.937767	NP_001237148	55.952	8.87e-16	73.6	uncharacterized LOC100527259(LOC100527259)	Glycine max		GO:0055114~oxidation-reduction process,	GO:0016021~integral component of membrane,	GO:0016491~oxidoreductase activity,	IPR006593:Cytochrome b561/ferric reductase transmembrane,			SM00665:B561,	Complete proteome,Electron transport,Membrane,Reference proteome,Transmembrane,Transmembrane helix,Transport,
NODE_1240310_length_1079_cov_5.768304	NP_174128	37.405	2.73e-13	68.9	ATP-dependent RNA helicase(AT1G28070)	Arabidopsis thaliana			GO:0005634~nucleus,						Complete proteome,Reference proteome,
NODE_124104_length_2908_cov_4.922283	NP_001148449	77.381	1.17e-35	134	RS21-C6 protein(LOC100282064)	Zea mays				GO:0047429~nucleoside-triphosphate diphosphatase activity,	IPR009039:EAR,IPR025984:MazG-like domain,	zma00240:Pyrimidine metabolism,zma01100:Metabolic pathways,			Complete proteome,Reference proteome,
NODE_1241390_length_985_cov_3.642640	NP_199351	61.644	1.17e-23	103	urea-proton symporter DEGRADATION OF UREA 3 (DUR3)(DUR3)	Arabidopsis thaliana		GO:0006995~cellular response to nitrogen starvation,GO:0071918~urea transmembrane transport,	GO:0005886~plasma membrane,GO:0005887~integral component of plasma membrane,GO:0016021~integral component of membrane,	GO:0015204~urea transmembrane transporter activity,GO:0015293~symporter activity,GO:0015370~solute:sodium symporter activity,	IPR001734:Sodium/solute symporter,				Cell membrane,Complete proteome,Membrane,Reference proteome,Symport,Transmembrane,Transmembrane helix,Transport,
NODE_124351_length_2128_cov_4.591166	NP_001141540	82.857	2.19e-33	134	uncharacterized LOC100273654(LOC100273654)	Zea mays		GO:0006355~regulation of transcription, DNA-templated,		GO:0003677~DNA binding,	IPR003851:Zinc finger, Dof-type,
NODE_124351_length_2128_cov_4.591166	NP_001315928	80	3.25e-33	133	dof zinc finger protein DOF2.4(LOC103447718)	Malus domestica		GO:0006355~regulation of transcription, DNA-templated,		GO:0003677~DNA binding,	IPR003851:Zinc finger, Dof-type,
NODE_1253977_length_1448_cov_4.252762	NP_001239629	84.211	1.9e-15	75.5	protein TERMINAL FLOWER 1-like(TFL1.1)	Glycine max					IPR001858:Phosphatidylethanolamine-binding, conserved site,IPR008914:Phosphatidylethanolamine-binding protein PEBP,
NODE_1253977_length_1448_cov_4.252762	NP_001240029	82.051	8.83e-14	70.9	CEN-like protein 2-like(CEN2)	Glycine max					IPR001858:Phosphatidylethanolamine-binding, conserved site,IPR008914:Phosphatidylethanolamine-binding protein PEBP,				Complete proteome,Reference proteome,
NODE_126307_length_1150_cov_4.366087	NP_001144959	51.596	3.63e-43	152	uncharacterized LOC100278096(LOC100278096)	Zea mays			GO:0016021~integral component of membrane,		IPR006747:Protein of unknown function DUF599,				Membrane,Transmembrane,Transmembrane helix,
NODE_97638_length_1141_cov_4.645048	NP_001144959	66.038	1.7e-15	77	uncharacterized LOC100278096(LOC100278096)	Zea mays			GO:0016021~integral component of membrane,		IPR006747:Protein of unknown function DUF599,				Membrane,Transmembrane,Transmembrane helix,
NODE_126307_length_1150_cov_4.366087	NP_199418	54.037	4.85e-30	117	spastin, putative (Protein of unknown function, DUF599)(AT5G46060)	Arabidopsis thaliana			GO:0016021~integral component of membrane,		IPR006747:Protein of unknown function DUF599,				Complete proteome,Membrane,Reference proteome,Transmembrane,Transmembrane helix,
NODE_97638_length_1141_cov_4.645048	NP_199418	45.614	1.53e-09	59.3	spastin, putative (Protein of unknown function, DUF599)(AT5G46060)	Arabidopsis thaliana			GO:0016021~integral component of membrane,		IPR006747:Protein of unknown function DUF599,				Complete proteome,Membrane,Reference proteome,Transmembrane,Transmembrane helix,
NODE_126338_length_3458_cov_5.264315	NP_172018	58.696	1.95e-81	173	Peroxidase superfamily protein(RCI3)	Arabidopsis thaliana		GO:0006979~response to oxidative stress,GO:0009269~response to desiccation,GO:0009409~response to cold,GO:0009664~plant-type cell wall organization,GO:0042538~hyperosmotic salinity response,GO:0042744~hydrogen peroxide catabolic process,GO:0055114~oxidation-reduction process,	GO:0005576~extracellular region,GO:0005783~endoplasmic reticulum,GO:0009505~plant-type cell wall,	GO:0004601~peroxidase activity,GO:0020037~heme binding,GO:0046872~metal ion binding,	IPR000823:Plant peroxidase,IPR002016:Haem peroxidase, plant/fungal/bacterial,IPR010255:Haem peroxidase,IPR019793:Peroxidases heam-ligand binding site,IPR019794:Peroxidase, active site,	ath00940:Phenylpropanoid biosynthesis,ath01100:Metabolic pathways,ath01110:Biosynthesis of secondary metabolites,			Calcium,Complete proteome,Disulfide bond,Glycoprotein,Heme,Hydrogen peroxide,Iron,Metal-binding,Oxidoreductase,Peroxidase,Reference proteome,Secreted,Signal,	active site:Proton acceptor,binding site:Substrate; via carbonyl oxygen,chain:Peroxidase 3,disulfide bond,glycosylation site:N-linked (GlcNAc...),metal ion-binding site:Calcium 1,metal ion-binding site:Calcium 1; via carbonyl oxygen,metal ion-binding site:Calcium 2,metal ion-binding site:Iron (heme axial ligand),modified residue,sequence conflict,signal peptide,site:Transition state stabilizer,
NODE_126843_length_1292_cov_5.362229	NP_001241811	33.094	6e-08	55.8	RNA-binding protein Nova-1(LOC100857007)	Zea mays				GO:0003723~RNA binding,	IPR004087:K Homology domain,IPR004088:K Homology domain, type 1,			SM00322:KH,
NODE_1268874_length_1460_cov_4.350000	NP_001295619	77.083	2.38e-15	77.4	putative methyltransferase DDB_G0268948(LOC105645087)	Jatropha curcas				GO:0008168~methyltransferase activity,	IPR013216:Methyltransferase type 11,				Complete proteome,Methyltransferase,Reference proteome,Transferase,
NODE_1268874_length_1460_cov_4.350000	NP_181669	72.917	1.24e-14	75.5	S-adenosyl-L-methionine-dependent methyltransferases superfamily protein(AT2G41380)	Arabidopsis thaliana		GO:0032259~methylation,GO:0046686~response to cadmium ion,	GO:0005739~mitochondrion,GO:0005768~endosome,GO:0005774~vacuolar membrane,GO:0005802~trans-Golgi network,GO:0005829~cytosol,	GO:0008757~S-adenosylmethionine-dependent methyltransferase activity,	IPR013216:Methyltransferase type 11,				Complete proteome,Methyltransferase,Reference proteome,Transferase,
NODE_1270291_length_992_cov_5.067540	NP_567191	68.571	1.32e-16	82	IQ-domain 17(iqd17)	Arabidopsis thaliana			GO:0005634~nucleus,	GO:0005516~calmodulin binding,	IPR000048:IQ motif, EF-hand binding site,IPR025064:Domain of unknown function DUF4005,			SM00015:IQ,	Complete proteome,Reference proteome,
NODE_127154_length_2866_cov_4.236217	NP_001280840	57.647	7.1e-24	105	probable WRKY transcription factor 17(WRKY16)	Malus domestica				GO:0003700~transcription factor activity, sequence-specific DNA binding,GO:0043565~sequence-specific DNA binding,	IPR003657:DNA-binding WRKY,IPR018872:Zn-cluster domain,			SM00774:WRKY,
NODE_127708_length_1828_cov_4.499453	NP_001312340	38.028	5.14e-18	90.1	TMV resistance protein N-like(LOC107786088)	Nicotiana tabacum		GO:0006952~defense response,GO:0007165~signal transduction,		GO:0043531~ADP binding,	IPR000157:Toll/interleukin-1 receptor homology (TIR) domain,IPR002182:NB-ARC,IPR003591:Leucine-rich repeat, typical subtype,IPR011991:Winged helix-turn-helix DNA-binding domain,IPR027417:P-loop containing nucleoside triphosphate hydrolase,			SM00255:TIR,SM00369:LRR_TYP,	Leucine-rich repeat,Plant defense,Repeat,
NODE_205107_length_1902_cov_5.310726	NP_001312340	45.223	4.37e-31	131	TMV resistance protein N-like(LOC107786088)	Nicotiana tabacum		GO:0006952~defense response,GO:0007165~signal transduction,		GO:0043531~ADP binding,	IPR000157:Toll/interleukin-1 receptor homology (TIR) domain,IPR002182:NB-ARC,IPR003591:Leucine-rich repeat, typical subtype,IPR011991:Winged helix-turn-helix DNA-binding domain,IPR027417:P-loop containing nucleoside triphosphate hydrolase,			SM00255:TIR,SM00369:LRR_TYP,	Leucine-rich repeat,Plant defense,Repeat,
NODE_314686_length_2081_cov_4.599231	NP_001312340	46.528	4.8e-30	129	TMV resistance protein N-like(LOC107786088)	Nicotiana tabacum		GO:0006952~defense response,GO:0007165~signal transduction,		GO:0043531~ADP binding,	IPR000157:Toll/interleukin-1 receptor homology (TIR) domain,IPR002182:NB-ARC,IPR003591:Leucine-rich repeat, typical subtype,IPR011991:Winged helix-turn-helix DNA-binding domain,IPR027417:P-loop containing nucleoside triphosphate hydrolase,			SM00255:TIR,SM00369:LRR_TYP,	Leucine-rich repeat,Plant defense,Repeat,
NODE_594868_length_2175_cov_4.821149	NP_001312340	50.943	3.34e-06	52.4	TMV resistance protein N-like(LOC107786088)	Nicotiana tabacum		GO:0006952~defense response,GO:0007165~signal transduction,		GO:0043531~ADP binding,	IPR000157:Toll/interleukin-1 receptor homology (TIR) domain,IPR002182:NB-ARC,IPR003591:Leucine-rich repeat, typical subtype,IPR011991:Winged helix-turn-helix DNA-binding domain,IPR027417:P-loop containing nucleoside triphosphate hydrolase,			SM00255:TIR,SM00369:LRR_TYP,	Leucine-rich repeat,Plant defense,Repeat,
NODE_655514_length_1569_cov_4.924793	NP_001312340	50.685	8.66e-31	129	TMV resistance protein N-like(LOC107786088)	Nicotiana tabacum		GO:0006952~defense response,GO:0007165~signal transduction,		GO:0043531~ADP binding,	IPR000157:Toll/interleukin-1 receptor homology (TIR) domain,IPR002182:NB-ARC,IPR003591:Leucine-rich repeat, typical subtype,IPR011991:Winged helix-turn-helix DNA-binding domain,IPR027417:P-loop containing nucleoside triphosphate hydrolase,			SM00255:TIR,SM00369:LRR_TYP,	Leucine-rich repeat,Plant defense,Repeat,
NODE_656230_length_1298_cov_4.693375	NP_001312340	58.974	5.73e-21	97.4	TMV resistance protein N-like(LOC107786088)	Nicotiana tabacum		GO:0006952~defense response,GO:0007165~signal transduction,		GO:0043531~ADP binding,	IPR000157:Toll/interleukin-1 receptor homology (TIR) domain,IPR002182:NB-ARC,IPR003591:Leucine-rich repeat, typical subtype,IPR011991:Winged helix-turn-helix DNA-binding domain,IPR027417:P-loop containing nucleoside triphosphate hydrolase,			SM00255:TIR,SM00369:LRR_TYP,	Leucine-rich repeat,Plant defense,Repeat,
NODE_1277272_length_952_cov_5.075630	NP_001316768	58.73	8.14e-45	159	alpha-amylase(LOC108346293)	Vigna angularis		GO:0005975~carbohydrate metabolic process,		GO:0004556~alpha-amylase activity,GO:0005509~calcium ion binding,	IPR006046:Alpha amylase,IPR006047:Glycosyl hydrolase, family 13, catalytic domain,IPR012850:Alpha-amylase, C-terminal beta-sheet,IPR013775:Alpha-amylase, plant,IPR013780:Glycosyl hydrolase, family 13, all-beta,IPR013781:Glycoside hydrolase, catalytic domain,IPR015902:Glycoside hydrolase, family 13,IPR017853:Glycoside hydrolase, superfamily,		PIRSF001028:alpha-amylase, plant type,	SM00642:Aamy,SM00810:Alpha-amyl_C2,	Carbohydrate metabolism,Complete proteome,Glycosidase,Hydrolase,Reference proteome,Signal,
NODE_1281278_length_1466_cov_3.251705	NP_001152151	53.125	7.47e-16	80.1	plant-specific domain TIGR01568 family protein(LOC100285789)	Zea mays					IPR006458:Ovate protein family, C-terminal,
NODE_128519_length_1305_cov_4.818391	NP_181810	48.515	1.16e-25	103	HVA22-like protein F(HVA22F)	Arabidopsis thaliana			GO:0016021~integral component of membrane,		IPR004345:TB2/DP1/HVA22-related protein,				Complete proteome,Membrane,Reference proteome,Transmembrane,Transmembrane helix,	chain:HVA22-like protein f,transmembrane region,
NODE_128519_length_1305_cov_4.818391	NP_177128	36.905	2.15e-12	67	HVA22 homologue C(HVA22C)	Arabidopsis thaliana		GO:0009414~response to water deprivation,GO:0009737~response to abscisic acid,GO:0042538~hyperosmotic salinity response,	GO:0005634~nucleus,GO:0009506~plasmodesma,GO:0016021~integral component of membrane,		IPR004345:TB2/DP1/HVA22-related protein,				Complete proteome,Membrane,Reference proteome,Transmembrane,Transmembrane helix,	chain:HVA22-like protein c,compositionally biased region:Poly-Asp,transmembrane region,
NODE_128523_length_1439_cov_4.389854	NP_001312739	67.677	3.36e-44	142	purple acid phosphatase 15-like(LOC107807820)	Nicotiana tabacum				GO:0003993~acid phosphatase activity,GO:0046872~metal ion binding,	IPR004843:Metallophosphoesterase domain,IPR008963:Purple acid phosphatase-like, N-terminal,IPR015914:Purple acid phosphatase, N-terminal,IPR025733:Iron/zinc purple acid phosphatase-like C-terminal domain,				Hydrolase,Signal,
NODE_1294840_length_1338_cov_4.412556	NP_001143628	86.207	2.25e-16	82.4	uncharacterized LOC100276346(pco075969b)	Zea mays					IPR010765:Protein of unknown function DUF1350,
NODE_129701_length_2582_cov_4.980635	NP_001304568	60.526	3.29e-103	331	cytochrome P450 84A1-like(LOC100793538)	Glycine max				GO:0004497~monooxygenase activity,GO:0005506~iron ion binding,GO:0016705~oxidoreductase activity, acting on paired donors, with incorporation or reduction of molecular oxygen,GO:0020037~heme binding,	IPR001128:Cytochrome P450,IPR002401:Cytochrome P450, E-class, group I,IPR017972:Cytochrome P450, conserved site,	gmx00940:Phenylpropanoid biosynthesis,gmx01100:Metabolic pathways,gmx01110:Biosynthesis of secondary metabolites,			Heme,Iron,Metal-binding,Monooxygenase,Oxidoreductase,
NODE_1298616_length_955_cov_5.002094	NP_001316739	66.154	6.89e-54	179	probable xyloglucan endotransglucosylase/hydrolase protein 32(LOC108322412)	Vigna angularis		GO:0010411~xyloglucan metabolic process,GO:0042546~cell wall biogenesis,GO:0071555~cell wall organization,	GO:0005618~cell wall,GO:0048046~apoplast,	GO:0004553~hydrolase activity, hydrolyzing O-glycosyl compounds,GO:0016762~xyloglucan:xyloglucosyl transferase activity,	IPR000757:Glycoside hydrolase, family 16,IPR010713:Xyloglucan endo-transglycosylase, C-terminal,IPR013320:Concanavalin A-like lectin/glucanase, subgroup,IPR016455:Xyloglucan endotransglucosylase/hydrolase,		PIRSF005604:xyloglucan endotransglucosylase/hydrolase,		Apoplast,Cell wall,Cell wall biogenesis/degradation,Complete proteome,Glycosidase,Hydrolase,Reference proteome,Secreted,Signal,Transferase,
NODE_1298616_length_955_cov_5.002094	NP_001280929	64.615	1.15e-51	174	probable xyloglucan endotransglucosylase/hydrolase protein 32(LOC103449997)	Malus domestica		GO:0010411~xyloglucan metabolic process,GO:0042546~cell wall biogenesis,GO:0071555~cell wall organization,	GO:0005618~cell wall,GO:0048046~apoplast,	GO:0004553~hydrolase activity, hydrolyzing O-glycosyl compounds,GO:0016762~xyloglucan:xyloglucosyl transferase activity,	IPR000757:Glycoside hydrolase, family 16,IPR010713:Xyloglucan endo-transglycosylase, C-terminal,IPR013320:Concanavalin A-like lectin/glucanase, subgroup,IPR016455:Xyloglucan endotransglucosylase/hydrolase,		PIRSF005604:xyloglucan endotransglucosylase/hydrolase,		Apoplast,Cell wall,Cell wall biogenesis/degradation,Glycosidase,Hydrolase,Secreted,Signal,Transferase,
NODE_1303202_length_1310_cov_5.141222	NP_001321069	75.758	1.37e-46	161	plastocyanin 1(PETE1)	Arabidopsis thaliana		GO:0046688~response to copper ion,GO:0055114~oxidation-reduction process,	GO:0009507~chloroplast,GO:0009535~chloroplast thylakoid membrane,GO:0009543~chloroplast thylakoid lumen,GO:0009579~thylakoid,GO:0031977~thylakoid lumen,	GO:0005507~copper ion binding,GO:0009055~electron carrier activity,	IPR000923:Blue (type 1) copper domain,IPR001235:Blue (type 1) copper protein,IPR002387:Plastocyanin,IPR008972:Cupredoxin,	ath00195:Photosynthesis,			Chloroplast,Complete proteome,Copper,Direct protein sequencing,Electron transport,Membrane,Metal-binding,Plastid,Reference proteome,Thylakoid,Transit peptide,Transport,	chain:Plastocyanin minor isoform, chloroplastic,domain:Plastocyanin-like,metal ion-binding site:Copper,sequence conflict,transit peptide:Chloroplast,
NODE_130947_length_2720_cov_4.166544	NP_001078368	56	9.97e-36	135	Heavy metal transport/detoxification superfamily protein(AT4G10465)	Arabidopsis thaliana		GO:0030001~metal ion transport,GO:0046916~cellular transition metal ion homeostasis,	GO:0005576~extracellular region,GO:0005737~cytoplasm,	GO:0046914~transition metal ion binding,	IPR006121:Heavy metal-associated domain, HMA,				Complete proteome,Lipoprotein,Metal-binding,Methylation,Prenylation,Reference proteome,
NODE_426947_length_2600_cov_4.490385	NP_001078368	49.55	2.73e-15	76.3	Heavy metal transport/detoxification superfamily protein(AT4G10465)	Arabidopsis thaliana		GO:0030001~metal ion transport,GO:0046916~cellular transition metal ion homeostasis,	GO:0005576~extracellular region,GO:0005737~cytoplasm,	GO:0046914~transition metal ion binding,	IPR006121:Heavy metal-associated domain, HMA,				Complete proteome,Lipoprotein,Metal-binding,Methylation,Prenylation,Reference proteome,
NODE_1312005_length_2141_cov_12.835124	NP_194449	41.6	2.14e-25	102	NB-ARC domain-containing disease resistance protein(AT4G27190)	Arabidopsis thaliana		GO:0006952~defense response,	GO:0005739~mitochondrion,	GO:0005524~ATP binding,GO:0043531~ADP binding,	IPR001611:Leucine-rich repeat,IPR002182:NB-ARC,IPR027417:P-loop containing nucleoside triphosphate hydrolase,				ATP-binding,Coiled coil,Complete proteome,Leucine-rich repeat,Nucleotide-binding,Plant defense,Reference proteome,Repeat,	chain:Disease resistance protein At4g27190,domain:NB-ARC,nucleotide phosphate-binding region:ATP,repeat:LRR 1,repeat:LRR 2,repeat:LRR 3,repeat:LRR 4,repeat:LRR 5,repeat:LRR 6,repeat:LRR 7,
NODE_13183_length_2119_cov_4.810288	NP_001150619	42.188	6.84e-08	57	nodulin-like protein(LOC100284252)	Zea mays			GO:0016021~integral component of membrane,	GO:0022857~transmembrane transporter activity,	IPR000620:Drug/metabolite transporter,				Complete proteome,Membrane,Reference proteome,Transmembrane,Transmembrane helix,
NODE_132233_length_1425_cov_4.305965	NP_001304480	36.364	1.62e-09	51.6	uncharacterized LOC100783984(LOC100783984)	Glycine max					IPR010683:Protein of unknown function DUF1262,
NODE_538933_length_2063_cov_5.422201	NP_001304480	66.667	7.25e-07	53.5	uncharacterized LOC100783984(LOC100783984)	Glycine max					IPR010683:Protein of unknown function DUF1262,
NODE_13242_length_1136_cov_4.735916	NP_001142511	71.429	4.38e-08	53.9	uncharacterized LOC100274747(TIDP3214)	Zea mays					IPR021899:Protein of unknown function DUF3511,				Complete proteome,Reference proteome,
NODE_1333019_length_2292_cov_4.575480	NP_174001	73.333	1.47e-07	55.8	Dof-type zinc finger DNA-binding family protein(AT1G26790)	Arabidopsis thaliana		GO:0006351~transcription, DNA-templated,GO:0006355~regulation of transcription, DNA-templated,	GO:0005634~nucleus,	GO:0003677~DNA binding,GO:0003700~transcription factor activity, sequence-specific DNA binding,GO:0046872~metal ion binding,	IPR003851:Zinc finger, Dof-type,				Complete proteome,DNA-binding,Metal-binding,Nucleus,Reference proteome,Signal,Transcription,Transcription regulation,Zinc,Zinc-finger,	chain:Dof zinc finger protein DOF1.3,compositionally biased region:Ser-rich,zinc finger region:Dof-type,
NODE_1333019_length_2292_cov_4.575480	NP_001318708	58.333	2.85e-07	55.1	cycling DOF factor 2(CDF2)	Arabidopsis thaliana		GO:0006351~transcription, DNA-templated,GO:0006355~regulation of transcription, DNA-templated,GO:0009908~flower development,GO:0048510~regulation of timing of transition from vegetative to reproductive phase,	GO:0005634~nucleus,	GO:0003677~DNA binding,GO:0003700~transcription factor activity, sequence-specific DNA binding,GO:0005515~protein binding,GO:0043565~sequence-specific DNA binding,GO:0046872~metal ion binding,	IPR003851:Zinc finger, Dof-type,				Complete proteome,DNA-binding,Flowering,Metal-binding,Nucleus,Reference proteome,Transcription,Transcription regulation,Zinc,Zinc-finger,	chain:Dof zinc finger protein DOF5.2,compositionally biased region:Pro-rich,sequence conflict,zinc finger region:Dof-type,
NODE_1338943_length_1561_cov_4.807175	NP_179770	44.828	4.95e-15	79.7	ribonucleotide reductase 1(RNR1)	Arabidopsis thaliana		GO:0006260~DNA replication,GO:0009202~deoxyribonucleoside triphosphate biosynthetic process,GO:0009263~deoxyribonucleotide biosynthetic process,GO:0046686~response to cadmium ion,GO:0055114~oxidation-reduction process,	GO:0005737~cytoplasm,GO:0005971~ribonucleoside-diphosphate reductase complex,	GO:0004748~ribonucleoside-diphosphate reductase activity, thioredoxin disulfide as acceptor,GO:0005524~ATP binding,	IPR000788:Ribonucleotide reductase large subunit, C-terminal,IPR005144:ATP-cone,IPR008926:Ribonucleotide reductase R1 subunit, N-terminal,IPR013346:Ribonucleotide reductase, class I , alpha subunit,IPR013509:Ribonucleotide reductase large subunit, N-terminal,	ath00230:Purine metabolism,ath00240:Pyrimidine metabolism,ath00480:Glutathione metabolism,ath01100:Metabolic pathways,			Allosteric enzyme,ATP-binding,Complete proteome,Cytoplasm,Disulfide bond,DNA replication,Nucleotide-binding,Oxidoreductase,Reference proteome,	active site:Cysteine radical intermediate,active site:Proton acceptor,binding site:Allosteric activator,binding site:Substrate,binding site:Substrate; via amide nitrogen,chain:Ribonucleoside-diphosphate reductase large subunit,disulfide bond,domain:ATP-cone,region of interest:Allosteric activator binding,region of interest:Allosteric effector binding, determines substrate specificity,region of in…
NODE_463710_length_1150_cov_4.400000	NP_179770	75.472	4.38e-29	82.8	ribonucleotide reductase 1(RNR1)	Arabidopsis thaliana		GO:0006260~DNA replication,GO:0009202~deoxyribonucleoside triphosphate biosynthetic process,GO:0009263~deoxyribonucleotide biosynthetic process,GO:0046686~response to cadmium ion,GO:0055114~oxidation-reduction process,	GO:0005737~cytoplasm,GO:0005971~ribonucleoside-diphosphate reductase complex,	GO:0004748~ribonucleoside-diphosphate reductase activity, thioredoxin disulfide as acceptor,GO:0005524~ATP binding,	IPR000788:Ribonucleotide reductase large subunit, C-terminal,IPR005144:ATP-cone,IPR008926:Ribonucleotide reductase R1 subunit, N-terminal,IPR013346:Ribonucleotide reductase, class I , alpha subunit,IPR013509:Ribonucleotide reductase large subunit, N-terminal,	ath00230:Purine metabolism,ath00240:Pyrimidine metabolism,ath00480:Glutathione metabolism,ath01100:Metabolic pathways,			Allosteric enzyme,ATP-binding,Complete proteome,Cytoplasm,Disulfide bond,DNA replication,Nucleotide-binding,Oxidoreductase,Reference proteome,	active site:Cysteine radical intermediate,active site:Proton acceptor,binding site:Allosteric activator,binding site:Substrate,binding site:Substrate; via amide nitrogen,chain:Ribonucleoside-diphosphate reductase large subunit,disulfide bond,domain:ATP-cone,region of interest:Allosteric activator binding,region of interest:Allosteric effector binding, determines substrate specificity,region of in…
NODE_133927_length_1683_cov_5.415330	NP_188020	53.521	3.11e-14	76.6	Pectin lyase-like superfamily protein(AT3G14040)	Arabidopsis thaliana		GO:0005975~carbohydrate metabolic process,GO:0071555~cell wall organization,	GO:0005576~extracellular region,	GO:0004650~polygalacturonase activity,	IPR000743:Glycoside hydrolase, family 28,IPR006626:Parallel beta-helix repeat,IPR011050:Pectin lyase fold/virulence factor,IPR012334:Pectin lyase fold,			SM00710:PbH1,	Cell wall biogenesis/degradation,Complete proteome,Glycosidase,Hydrolase,Reference proteome,Secreted,Signal,
NODE_134368_length_1271_cov_4.918962	NP_001290000	84	1.6e-06	52	two-component response regulator-like PRR73(BTC1)	Beta vulgaris subsp. vulgaris		GO:0000160~phosphorelay signal transduction system,GO:0007623~circadian rhythm,GO:0010017~red or far-red light signaling pathway,GO:0045892~negative regulation of transcription, DNA-templated,	GO:0005622~intracellular,GO:0005634~nucleus,GO:0005739~mitochondrion,	GO:0003677~DNA binding,	IPR001789:Signal transduction response regulator, receiver domain,IPR010402:CCT domain,IPR011006:CheY-like superfamily,			SM00448:REC,	Complete proteome,Reference proteome,
NODE_134496_length_1784_cov_5.376121	NP_001151108	82.759	9.02e-08	56.6	uncharacterized LOC100284741(pco096155)	Zea mays			GO:0016021~integral component of membrane,		IPR019378:GDP-fucose protein O-fucosyltransferase,IPR024709:O-fucosyltransferase, plant,		PIRSF009360:uncharacterized conserved protein with GDP-fucose protein O-fucosyltransferase domain,		Complete proteome,Membrane,Reference proteome,Transmembrane,Transmembrane helix,
NODE_134553_length_1302_cov_3.949309	NP_001241369	88.312	9.73e-44	150	60S ribosomal protein L35a-1-like(LOC100800463)	Glycine max		GO:0002181~cytoplasmic translation,GO:0042273~ribosomal large subunit biogenesis,	GO:0022625~cytosolic large ribosomal subunit,	GO:0003735~structural constituent of ribosome,	IPR001780:Ribosomal protein L35A,IPR009000:Translation elongation/initiation factor/Ribosomal, beta-barrel,IPR018266:Ribosomal protein L35Ae, conserved site,	gmx03010:Ribosome,			Complete proteome,Reference proteome,
NODE_134732_length_2558_cov_4.905786	NP_001305500	68.421	2.27e-08	57.8	NAP1-related protein 2-like(LOC102585233)	Solanum tuberosum		GO:0006334~nucleosome assembly,	GO:0005634~nucleus,		IPR002164:Nucleosome assembly protein (NAP),				Coiled coil,
NODE_134732_length_2558_cov_4.905786	NP_001105648	65.789	8.03e-08	55.8	nucleosome/chromatin assembly factor A104(nfa104)	Zea mays		GO:0006334~nucleosome assembly,	GO:0005634~nucleus,		IPR002164:Nucleosome assembly protein (NAP),				Coiled coil,Complete proteome,Reference proteome,
NODE_134830_length_1008_cov_5.015873	NP_001315710	67.47	1.76e-33	125	zinc finger protein CONSTANS-LIKE 2-like(LOC103411260)	Malus domestica			GO:0005622~intracellular,	GO:0008270~zinc ion binding,	IPR000315:Zinc finger, B-box,			SM00336:BBOX,
NODE_134830_length_1008_cov_5.015873	NP_200258	58.763	5.65e-32	120	B-box type zinc finger family protein(BBX29)	Arabidopsis thaliana		GO:0006355~regulation of transcription, DNA-templated,GO:0009409~response to cold,GO:0009555~pollen development,	GO:0005622~intracellular,GO:0005634~nucleus,	GO:0003700~transcription factor activity, sequence-specific DNA binding,GO:0008270~zinc ion binding,	IPR000315:Zinc finger, B-box,			SM00336:BBOX,	Complete proteome,Reference proteome,
NODE_1348996_length_1158_cov_3.930915	NP_001117378	58.252	1.15e-29	120	O-fucosyltransferase family protein(AT1G29200)	Arabidopsis thaliana			GO:0005794~Golgi apparatus,GO:0016021~integral component of membrane,	GO:0016757~transferase activity, transferring glycosyl groups,	IPR019378:GDP-fucose protein O-fucosyltransferase,IPR024709:O-fucosyltransferase, plant,		PIRSF009360:uncharacterized conserved protein with GDP-fucose protein O-fucosyltransferase domain,		Complete proteome,Glycosyltransferase,Membrane,Reference proteome,Transferase,Transmembrane,Transmembrane helix,
NODE_135529_length_3456_cov_4.690393	NP_054939	52.778	5.35e-06	38.1	NADH dehydrogenase 30 kDa subunit(ndhJ)	Spinacia oleracea		GO:0006810~transport,GO:0019684~photosynthesis, light reaction,	GO:0009535~chloroplast thylakoid membrane,	GO:0008137~NADH dehydrogenase (ubiquinone) activity,GO:0048038~quinone binding,	IPR001268:NADH:ubiquinone oxidoreductase, 30kDa subunit,IPR010218:NADH dehydrogenase, subunit C,IPR020396:NADH:ubiquinone oxidoreductase, 30kDa subunit, conserved site,				Chloroplast,Membrane,NAD,NADP,Oxidoreductase,Plastid,Plastoquinone,Quinone,Thylakoid,Transport,	chain:NAD(P)H-quinone oxidoreductase subunit J, chloroplastic,
NODE_135685_length_2222_cov_4.812331	NP_001241119	65.217	2.1e-38	147	transcription factor bHLH30-like(LOC100785826)	Glycine max					IPR011598:Myc-type, basic helix-loop-helix (bHLH) domain,			SM00353:HLH,	Complete proteome,Reference proteome,
NODE_1359257_length_1143_cov_3.909011	NP_001142528	83.333	1.22e-13	67.4	uncharacterized LOC100274770(LOC100274770)	Zea mays			GO:0005751~mitochondrial respiratory chain complex IV,	GO:0004129~cytochrome-c oxidase activity,	IPR001349:Cytochrome c oxidase, subunit VIa,	zma00190:Oxidative phosphorylation,zma01100:Metabolic pathways,			Complete proteome,Reference proteome,
NODE_1359257_length_1143_cov_3.909011	NP_001236940	59.615	7.18e-12	62.8	uncharacterized LOC100527245(LOC100527245)	Glycine max			GO:0005751~mitochondrial respiratory chain complex IV,	GO:0004129~cytochrome-c oxidase activity,	IPR001349:Cytochrome c oxidase, subunit VIa,	gmx00190:Oxidative phosphorylation,gmx01100:Metabolic pathways,	PIRSF000277:cytochrome-c oxidase, subunit VIa,		Complete proteome,Reference proteome,
NODE_136306_length_1169_cov_4.428571	NP_001238448	75	1.29e-15	80.1	NSP-interacting kinase(LOC100305388)	Glycine max			GO:0016021~integral component of membrane,	GO:0004672~protein kinase activity,GO:0004674~protein serine/threonine kinase activity,GO:0005524~ATP binding,	IPR000719:Protein kinase, catalytic domain,IPR001611:Leucine-rich repeat,IPR008271:Serine/threonine-protein kinase, active site,IPR011009:Protein kinase-like domain,IPR013210:Leucine-rich repeat-containing N-terminal, type 2,IPR013320:Concanavalin A-like lectin/glucanase, subgroup,IPR017441:Protein kinase, ATP binding site,			SM00220:S_TKc,	ATP-binding,Complete proteome,Kinase,Leucine-rich repeat,Membrane,Nucleotide-binding,Receptor,Reference proteome,Repeat,Serine/threonine-protein kinase,Signal,Transferase,Transmembrane,Transmembrane helix,
NODE_153395_length_2936_cov_4.856948	NP_001238448	74.386	4.08e-135	420	NSP-interacting kinase(LOC100305388)	Glycine max			GO:0016021~integral component of membrane,	GO:0004672~protein kinase activity,GO:0004674~protein serine/threonine kinase activity,GO:0005524~ATP binding,	IPR000719:Protein kinase, catalytic domain,IPR001611:Leucine-rich repeat,IPR008271:Serine/threonine-protein kinase, active site,IPR011009:Protein kinase-like domain,IPR013210:Leucine-rich repeat-containing N-terminal, type 2,IPR013320:Concanavalin A-like lectin/glucanase, subgroup,IPR017441:Protein kinase, ATP binding site,			SM00220:S_TKc,	ATP-binding,Complete proteome,Kinase,Leucine-rich repeat,Membrane,Nucleotide-binding,Receptor,Reference proteome,Repeat,Serine/threonine-protein kinase,Signal,Transferase,Transmembrane,Transmembrane helix,
NODE_136443_length_1037_cov_3.824494	NP_001236579	66.667	5.35e-12	66.6	uncharacterized LOC100499829(LOC100499829)	Glycine max				GO:0000049~tRNA binding,	IPR002547:tRNA-binding domain,IPR012340:Nucleic acid-binding, OB-fold,
NODE_136650_length_1486_cov_4.261104	NP_001280799	94.444	2.89e-24	103	PHD finger protein ALFIN-LIKE 4(ALF2)	Malus domestica		GO:0006355~regulation of transcription, DNA-templated,		GO:0008270~zinc ion binding,	IPR001965:Zinc finger, PHD-type,IPR011011:Zinc finger, FYVE/PHD-type,IPR013083:Zinc finger, RING/FYVE/PHD-type,IPR019786:Zinc finger, PHD-type, conserved site,IPR019787:Zinc finger, PHD-finger,IPR021998:Protein of unknown function DUF3594,			SM00249:PHD,	Metal-binding,Zinc,Zinc-finger,
NODE_907969_length_1108_cov_4.022563	NP_001280799	87.356	2.33e-29	115	PHD finger protein ALFIN-LIKE 4(ALF2)	Malus domestica		GO:0006355~regulation of transcription, DNA-templated,		GO:0008270~zinc ion binding,	IPR001965:Zinc finger, PHD-type,IPR011011:Zinc finger, FYVE/PHD-type,IPR013083:Zinc finger, RING/FYVE/PHD-type,IPR019786:Zinc finger, PHD-type, conserved site,IPR019787:Zinc finger, PHD-finger,IPR021998:Protein of unknown function DUF3594,			SM00249:PHD,	Metal-binding,Zinc,Zinc-finger,
NODE_1368072_length_1274_cov_4.153061	NP_173550	31.013	1.98e-19	88.2	Copia-like polyprotein/retrotransposon(AT1G21280)	Arabidopsis thaliana			GO:0005634~nucleus,						Complete proteome,Reference proteome,
NODE_181207_length_1147_cov_5.267655	NP_173550	28.671	1.31e-08	56.6	Copia-like polyprotein/retrotransposon(AT1G21280)	Arabidopsis thaliana			GO:0005634~nucleus,						Complete proteome,Reference proteome,
NODE_240233_length_1776_cov_4.891892	NP_173550	30.233	6.38e-13	70.1	Copia-like polyprotein/retrotransposon(AT1G21280)	Arabidopsis thaliana			GO:0005634~nucleus,						Complete proteome,Reference proteome,
NODE_245426_length_2762_cov_4.830557	NP_173550	30.065	1.25e-14	75.9	Copia-like polyprotein/retrotransposon(AT1G21280)	Arabidopsis thaliana			GO:0005634~nucleus,						Complete proteome,Reference proteome,
NODE_366362_length_1440_cov_4.918750	NP_173550	20.513	4.61e-06	49.3	Copia-like polyprotein/retrotransposon(AT1G21280)	Arabidopsis thaliana			GO:0005634~nucleus,						Complete proteome,Reference proteome,
NODE_408778_length_1305_cov_5.062835	NP_173550	22.047	3.58e-06	49.3	Copia-like polyprotein/retrotransposon(AT1G21280)	Arabidopsis thaliana			GO:0005634~nucleus,						Complete proteome,Reference proteome,
NODE_424196_length_1400_cov_5.271429	NP_173550	27.869	3.88e-07	52.4	Copia-like polyprotein/retrotransposon(AT1G21280)	Arabidopsis thaliana			GO:0005634~nucleus,						Complete proteome,Reference proteome,
NODE_561822_length_1660_cov_3.831325	NP_173550	26.543	4.24e-12	67.4	Copia-like polyprotein/retrotransposon(AT1G21280)	Arabidopsis thaliana			GO:0005634~nucleus,						Complete proteome,Reference proteome,
NODE_810715_length_1414_cov_4.062942	NP_173550	26.396	3.06e-14	73.6	Copia-like polyprotein/retrotransposon(AT1G21280)	Arabidopsis thaliana			GO:0005634~nucleus,						Complete proteome,Reference proteome,
NODE_137506_length_2284_cov_5.323555	NP_001314279	37.113	4.12e-10	63.9	mediator-associated protein 1-like(LOC107932671)	Gossypium hirsutum		GO:0006355~regulation of transcription, DNA-templated,			IPR007592:Protein of unknown function DUF573,
NODE_137910_length_4088_cov_5.447896	NP_176369	44.845	1.58e-58	202	Late embryogenesis abundant (LEA) hydroxyproline-rich glycoprotein family(AT1G61760)	Arabidopsis thaliana		GO:0006952~defense response,	GO:0005886~plasma membrane,GO:0009506~plasmodesma,GO:0016021~integral component of membrane,GO:0046658~anchored component of plasma membrane,	GO:0004871~signal transducer activity,	IPR004864:Late embryogenesis abundant protein, LEA-14,				Complete proteome,Membrane,Reference proteome,Transmembrane,Transmembrane helix,
NODE_1383916_length_989_cov_4.370071	NP_001234628	49.505	2.63e-24	103	gibberellin 20-oxidase-2(20ox-2)	Solanum lycopersicum						sly00904:Diterpenoid biosynthesis,sly01100:Metabolic pathways,sly01110:Biosynthesis of secondary metabolites,
NODE_138445_length_1663_cov_4.874925	NP_001242778	61.702	6.01e-13	69.7	BAH and coiled-coil domain-containing protein 1-like(LOC100800993)	Glycine max		GO:0006342~chromatin silencing,GO:0031507~heterochromatin assembly,	GO:0000785~chromatin,GO:0005677~chromatin silencing complex,	GO:0000976~transcription regulatory region sequence-specific DNA binding,GO:0003682~chromatin binding,GO:0008270~zinc ion binding,	IPR001025:Bromo adjacent homology (BAH) domain,IPR001965:Zinc finger, PHD-type,IPR011011:Zinc finger, FYVE/PHD-type,IPR013083:Zinc finger, RING/FYVE/PHD-type,IPR019786:Zinc finger, PHD-type, conserved site,IPR019787:Zinc finger, PHD-finger,			SM00249:PHD,SM00439:BAH,	Complete proteome,Metal-binding,Reference proteome,Zinc,Zinc-finger,
NODE_1387194_length_1007_cov_4.116187	NP_186818	79.208	3.95e-39	143	alpha/beta-Hydrolases superfamily protein(AT3G01690)	Arabidopsis thaliana			GO:0005634~nucleus,	GO:0016787~hydrolase activity,	IPR022742:Alpha/beta hydrolase, N-terminal,				Complete proteome,Hydrolase,Reference proteome,
NODE_212370_length_1260_cov_4.473810	NP_186818	75.248	1.84e-36	138	alpha/beta-Hydrolases superfamily protein(AT3G01690)	Arabidopsis thaliana			GO:0005634~nucleus,	GO:0016787~hydrolase activity,	IPR022742:Alpha/beta hydrolase, N-terminal,				Complete proteome,Hydrolase,Reference proteome,
NODE_138747_length_2899_cov_5.546395	NP_001169710	44.18	5.41e-64	235	uncharacterized LOC100383591(pco107491b)	Zea mays		GO:0006886~intracellular protein transport,GO:0016192~vesicle-mediated transport,	GO:0030117~membrane coat,		IPR002553:Clathrin/coatomer adaptor, adaptin-like, N-terminal,IPR011989:Armadillo-like helical,IPR016024:Armadillo-type fold,IPR017109:Adaptor protein complex AP-4, epsilon subunit,				Complete proteome,Membrane,Protein transport,Reference proteome,Transport,
NODE_40518_length_2130_cov_5.240376	NP_001169710	70.068	4.73e-47	181	uncharacterized LOC100383591(pco107491b)	Zea mays		GO:0006886~intracellular protein transport,GO:0016192~vesicle-mediated transport,	GO:0030117~membrane coat,		IPR002553:Clathrin/coatomer adaptor, adaptin-like, N-terminal,IPR011989:Armadillo-like helical,IPR016024:Armadillo-type fold,IPR017109:Adaptor protein complex AP-4, epsilon subunit,				Complete proteome,Membrane,Protein transport,Reference proteome,Transport,
NODE_1390702_length_1259_cov_5.260524	NP_196038	57.895	3.62e-06	49.7	alpha carbonic anhydrase 3(ACA3)	Arabidopsis thaliana		GO:0006730~one-carbon metabolic process,GO:0010037~response to carbon dioxide,	GO:0005737~cytoplasm,GO:0009570~chloroplast stroma,	GO:0004089~carbonate dehydratase activity,GO:0008270~zinc ion binding,GO:0046872~metal ion binding,	IPR001148:Alpha carbonic anhydrase,IPR023561:Carbonic anhydrase, alpha-class,	ath00910:Nitrogen metabolism,		SM01057:SM01057,	Chloroplast,Complete proteome,Disulfide bond,Glycoprotein,Lyase,Metal-binding,Plastid,Reference proteome,Signal,Zinc,
NODE_1397338_length_1520_cov_3.896053	NP_001151760	60.87	6.98e-21	97.1	tetratricopeptide-like helical(LOC100285395)	Zea mays			GO:0005739~mitochondrion,		IPR002885:Pentatricopeptide repeat,				Complete proteome,Reference proteome,
NODE_1397338_length_1520_cov_3.896053	NP_001168310	50	6.36e-13	72.4	uncharacterized LOC100382076(LOC100382076)	Zea mays			GO:0009507~chloroplast,		IPR002885:Pentatricopeptide repeat,IPR011990:Tetratricopeptide-like helical,IPR019734:Tetratricopeptide repeat,				Complete proteome,Reference proteome,
NODE_1404490_length_1831_cov_5.002731	NP_001241931	86.111	2.32e-62	208	uncharacterized LOC100527629(LOC100527629)	Glycine max		GO:0009664~plant-type cell wall organization,	GO:0005576~extracellular region,GO:0005618~cell wall,GO:0016020~membrane,		IPR002963:Expansin,IPR007112:Expansin/pollen allergen, DPBB domain,IPR007117:Expansin, cellulose-binding-like domain,IPR007118:Expansin/Lol pI,IPR009009:Barwin-related endoglucanase,			SM00837:SM00837,	Membrane,Secreted,Signal,
NODE_1404490_length_1831_cov_5.002731	NP_001237850	84.259	1.35e-61	206	expansin(EXP1)	Glycine max		GO:0009664~plant-type cell wall organization,	GO:0005576~extracellular region,GO:0005618~cell wall,GO:0016020~membrane,		IPR002963:Expansin,IPR007112:Expansin/pollen allergen, DPBB domain,IPR007117:Expansin, cellulose-binding-like domain,IPR007118:Expansin/Lol pI,IPR009009:Barwin-related endoglucanase,			SM00837:SM00837,	Membrane,Secreted,Signal,
NODE_140826_length_2686_cov_5.731571	NP_197072	88.525	2.56e-59	223	ARM repeat superfamily protein(AT5G15680)	Arabidopsis thaliana		GO:0000902~cell morphogenesis,GO:0090527~actin filament reorganization,	GO:0005739~mitochondrion,GO:0005886~plasma membrane,GO:0005938~cell cortex,GO:0016020~membrane,GO:0030427~site of polarized growth,		IPR016024:Armadillo-type fold,IPR025481:Cell morphogenesis protein C-terminal,IPR025614:Cell morphogenesis protein N-terminal,				Complete proteome,Reference proteome,
NODE_141160_length_2813_cov_5.169925	NP_001132850	44.118	2.37e-10	65.1	uncharacterized LOC100194342(pco083336)	Zea mays	Cell division and chromosome partitioning / Cytoskeleton,				IPR000408:Regulator of chromosome condensation, RCC1,IPR009091:Regulator of chromosome condensation 1/beta-lactamase-inhibitor protein II,				Complete proteome,Reference proteome,Repeat,
NODE_1412258_length_1175_cov_4.053617	NP_001289450	68.571	2.5e-08	54.3	histone H3-like centromeric protein HTR12(LOC104114837)	Nicotiana tomentosiformis			GO:0000786~nucleosome,GO:0005634~nucleus,	GO:0003677~DNA binding,	IPR000164:Histone H3,IPR007125:Histone core,IPR009072:Histone-fold,			SM00428:H3,	Chromosome,DNA-binding,Nucleus,
NODE_1412258_length_1175_cov_4.053617	NP_001105520	73.529	4.27e-08	53.5	centromeric histone H3(cenH3)	Zea mays			GO:0000786~nucleosome,GO:0005634~nucleus,GO:0016021~integral component of membrane,	GO:0003677~DNA binding,	IPR000164:Histone H3,IPR007125:Histone core,IPR009072:Histone-fold,			SM00428:H3,	Chromosome,Complete proteome,DNA-binding,Membrane,Nucleus,Reference proteome,Transmembrane,Transmembrane helix,
NODE_141381_length_1312_cov_4.894055	NP_567990	64.516	3.57e-25	91.7	Pentatricopeptide repeat (PPR) superfamily protein(AT4G35850)	Arabidopsis thaliana			GO:0005739~mitochondrion,		IPR002885:Pentatricopeptide repeat,				Complete proteome,Mitochondrion,Reference proteome,Repeat,Transit peptide,	chain:Pentatricopeptide repeat-containing protein At4g35850, mitochondrial,repeat:PPR 1,repeat:PPR 2,repeat:PPR 3,repeat:PPR 4,repeat:PPR 5,repeat:PPR 6,sequence conflict,transit peptide:Mitochondrion,
NODE_141381_length_1312_cov_4.894055	NP_567990	61.765	3.57e-25	43.9	Pentatricopeptide repeat (PPR) superfamily protein(AT4G35850)	Arabidopsis thaliana			GO:0005739~mitochondrion,		IPR002885:Pentatricopeptide repeat,				Complete proteome,Mitochondrion,Reference proteome,Repeat,Transit peptide,	chain:Pentatricopeptide repeat-containing protein At4g35850, mitochondrial,repeat:PPR 1,repeat:PPR 2,repeat:PPR 3,repeat:PPR 4,repeat:PPR 5,repeat:PPR 6,sequence conflict,transit peptide:Mitochondrion,
NODE_1416357_length_1082_cov_4.599815	NP_001241249	41.714	5.38e-60	200	uncharacterized LOC100781497(LOC100781497)	Glycine max		GO:0045454~cell redox homeostasis,	GO:0005623~cell,	GO:0009055~electron carrier activity,GO:0015035~protein disulfide oxidoreductase activity,	IPR002109:Glutaredoxin,IPR012336:Thioredoxin-like fold,				Complete proteome,Reference proteome,
NODE_1416357_length_1082_cov_4.599815	NP_001136499	34.913	9.23e-38	142	uncharacterized LOC100216614(LOC100216614)	Zea mays		GO:0045454~cell redox homeostasis,	GO:0005623~cell,GO:0009506~plasmodesma,	GO:0009055~electron carrier activity,GO:0015035~protein disulfide oxidoreductase activity,	IPR002109:Glutaredoxin,IPR012336:Thioredoxin-like fold,				Complete proteome,Reference proteome,
NODE_142132_length_3045_cov_4.965189	NP_177291	67.568	2.83e-08	59.3	eukaryotic translation initiation factor SUI1 family protein(AT1G71350)	Arabidopsis thaliana	Translation, ribosomal structure and biogenesis,	GO:0001731~formation of translation preinitiation complex,GO:0002192~IRES-dependent translational initiation,GO:0006413~translational initiation,		GO:0003743~translation initiation factor activity,	IPR001950:Translation initiation factor SUI1,IPR002478:Pseudouridine synthase/archaeosine transglycosylase,IPR003121:SWIB/MDM2 domain,IPR015947:PUA-like domain,				Complete proteome,Initiation factor,Protein biosynthesis,Reference proteome,
NODE_143260_length_1163_cov_4.374032	NP_001237269	80	4.41e-09	59.7	VHS and GAT domain protein(LOC732580)	Glycine max		GO:0006886~intracellular protein transport,	GO:0005622~intracellular,		IPR002014:VHS,IPR004152:GAT,IPR008942:ENTH/VHS,			SM00288:VHS,	Complete proteome,Reference proteome,
NODE_1433352_length_1039_cov_6.118383	NP_001241911	75	1.27e-21	95.1	uncharacterized LOC100818950(LOC100818950)	Glycine max			GO:0016021~integral component of membrane,	GO:0008270~zinc ion binding,	IPR011016:Zinc finger, RING-CH-type,IPR013083:Zinc finger, RING/FYVE/PHD-type,			SM00744:RINGv,	Complete proteome,Membrane,Metal-binding,Reference proteome,Transmembrane,Transmembrane helix,Zinc,Zinc-finger,
NODE_168984_length_1736_cov_3.942396	NP_001241911	60	1.96e-15	79	uncharacterized LOC100818950(LOC100818950)	Glycine max			GO:0016021~integral component of membrane,	GO:0008270~zinc ion binding,	IPR011016:Zinc finger, RING-CH-type,IPR013083:Zinc finger, RING/FYVE/PHD-type,			SM00744:RINGv,	Complete proteome,Membrane,Metal-binding,Reference proteome,Transmembrane,Transmembrane helix,Zinc,Zinc-finger,
NODE_1433352_length_1039_cov_6.118383	NP_001278519	71.667	2.78e-21	94.4	uncharacterized LOC100282293(AI665421)	Zea mays	RNA processing and modification,		GO:0016021~integral component of membrane,	GO:0008270~zinc ion binding,	IPR011016:Zinc finger, RING-CH-type,IPR013083:Zinc finger, RING/FYVE/PHD-type,			SM00744:RINGv,	Complete proteome,Membrane,Metal-binding,Reference proteome,Transmembrane,Transmembrane helix,Zinc,Zinc-finger,
NODE_143710_length_1462_cov_5.129275	NP_001292778	48.352	1.16e-15	80.9	barley mlo defense gene homolog 5(LOC542063)	Zea mays		GO:0006952~defense response,GO:0009607~response to biotic stimulus,	GO:0016021~integral component of membrane,		IPR004326:Mlo-related protein,				Calmodulin-binding,Complete proteome,Membrane,Pathogenesis-related protein,Plant defense,Reference proteome,Transmembrane,Transmembrane helix,
NODE_746774_length_1085_cov_4.609217	NP_001292778	60	4.22e-07	53.1	barley mlo defense gene homolog 5(LOC542063)	Zea mays		GO:0006952~defense response,GO:0009607~response to biotic stimulus,	GO:0016021~integral component of membrane,		IPR004326:Mlo-related protein,				Calmodulin-binding,Complete proteome,Membrane,Pathogenesis-related protein,Plant defense,Reference proteome,Transmembrane,Transmembrane helix,
NODE_914847_length_1285_cov_5.334630	NP_001292778	40	6.85e-14	60.5	barley mlo defense gene homolog 5(LOC542063)	Zea mays		GO:0006952~defense response,GO:0009607~response to biotic stimulus,	GO:0016021~integral component of membrane,		IPR004326:Mlo-related protein,				Calmodulin-binding,Complete proteome,Membrane,Pathogenesis-related protein,Plant defense,Reference proteome,Transmembrane,Transmembrane helix,
NODE_143737_length_4526_cov_5.076889	NP_001236740	37.931	7.4e-27	118	heat shock factor protein hsf8-related(LOC732544)	Glycine max			GO:0005634~nucleus,	GO:0003700~transcription factor activity, sequence-specific DNA binding,GO:0043565~sequence-specific DNA binding,	IPR000232:Heat shock factor (HSF)-type, DNA-binding,IPR011991:Winged helix-turn-helix DNA-binding domain,			SM00415:HSF,	Coiled coil,DNA-binding,Nucleus,Stress response,
NODE_193770_length_2456_cov_4.638029	NP_001236740	74.627	3.39e-17	87	heat shock factor protein hsf8-related(LOC732544)	Glycine max			GO:0005634~nucleus,	GO:0003700~transcription factor activity, sequence-specific DNA binding,GO:0043565~sequence-specific DNA binding,	IPR000232:Heat shock factor (HSF)-type, DNA-binding,IPR011991:Winged helix-turn-helix DNA-binding domain,			SM00415:HSF,	Coiled coil,DNA-binding,Nucleus,Stress response,
NODE_143822_length_1348_cov_4.561573	NP_001104931	73.81	4.1e-12	70.1	RNA polymerase T phage-like 1(rpot1)	Zea mays		GO:0006351~transcription, DNA-templated,		GO:0003677~DNA binding,GO:0003899~DNA-directed RNA polymerase activity,	IPR002092:DNA-directed RNA polymerase, phage-type,IPR024075:DNA-directed RNA polymerase, helix hairpin domain,			SM01311:SM01311,	DNA-directed RNA polymerase,Nucleotidyltransferase,Transcription,Transferase,
NODE_143822_length_1348_cov_4.561573	NP_001312318	65.854	7.62e-11	65.9	DNA-directed RNA polymerase 1B, mitochondrial(LOC107784816)	Nicotiana tabacum		GO:0006351~transcription, DNA-templated,	GO:0005739~mitochondrion,	GO:0003677~DNA binding,GO:0003899~DNA-directed RNA polymerase activity,	IPR002092:DNA-directed RNA polymerase, phage-type,IPR024075:DNA-directed RNA polymerase, helix hairpin domain,			SM01311:SM01311,	DNA-directed RNA polymerase,Mitochondrion,Nucleotidyltransferase,Transcription,Transferase,Transit peptide,
NODE_758469_length_1362_cov_5.172540	NP_001312318	67.5	2.94e-07	54.7	DNA-directed RNA polymerase 1B, mitochondrial(LOC107784816)	Nicotiana tabacum		GO:0006351~transcription, DNA-templated,	GO:0005739~mitochondrion,	GO:0003677~DNA binding,GO:0003899~DNA-directed RNA polymerase activity,	IPR002092:DNA-directed RNA polymerase, phage-type,IPR024075:DNA-directed RNA polymerase, helix hairpin domain,			SM01311:SM01311,	DNA-directed RNA polymerase,Mitochondrion,Nucleotidyltransferase,Transcription,Transferase,Transit peptide,
NODE_144036_length_4481_cov_5.314885	NP_001308649	65.957	1.93e-12	72.8	uncharacterized protein LOC107521951(LOC107521951)	Zea mays		GO:0009058~biosynthetic process,		GO:0003824~catalytic activity,GO:0030170~pyridoxal phosphate binding,	IPR004838:Aminotransferases, class-I, pyridoxal-phosphate-binding site,IPR004839:Aminotransferase, class I/classII,IPR015421:Pyridoxal phosphate-dependent transferase, major region, subdomain 1,IPR015422:Pyridoxal phosphate-dependent transferase, major region, subdomain 2,IPR015424:Pyridoxal phosphate-dependent transferase,				Complete proteome,Reference proteome,
NODE_1445_length_1478_cov_4.979026	NP_001137000	74.908	2.32e-145	420	uncharacterized LOC100217163(pco089222)	Zea mays				GO:0004721~phosphoprotein phosphatase activity,GO:0046872~metal ion binding,	IPR004843:Metallophosphoesterase domain,IPR006186:Serine/threonine-specific protein phosphatase/bis(5-nucleosyl)-tetraphosphatase,	zma03015:mRNA surveillance pathway,zma04931:Insulin resistance,		SM00156:PP2Ac,	Complete proteome,Hydrolase,Manganese,Metal-binding,Protein phosphatase,Reference proteome,
NODE_1448713_length_1164_cov_4.910653	NP_201201	80	9.32e-09	58.9	DNA polymerase delta subunit 1(AT5G63960)	Arabidopsis thaliana		GO:0006260~DNA replication,GO:0006287~base-excision repair, gap-filling,GO:0006297~nucleotide-excision repair, DNA gap filling,GO:0007346~regulation of mitotic cell cycle,GO:0043137~DNA replication, removal of RNA primer,GO:0045004~DNA replication proofreading,	GO:0005634~nucleus,GO:0043625~delta DNA polymerase complex,	GO:0000166~nucleotide binding,GO:0003677~DNA binding,GO:0003887~DNA-directed DNA polymerase activity,GO:0008296~3'-5'-exodeoxyribonuclease activity,GO:0008408~3'-5' exonuclease activity,GO:0046872~metal ion binding,GO:0051539~4 iron, 4 sulfur cluster binding,	IPR006133:DNA-directed DNA polymerase, family B, exonuclease domain,IPR006134:DNA-directed DNA polymerase, family B, multifunctional domain,IPR006172:DNA-directed DNA polymerase, family B,IPR012337:Ribonuclease H-like domain,IPR017964:DNA-directed DNA polymerase, family B, conserved site,IPR023211:DNA polymerase, palm domain,IPR025687:C4-type zinc-finger of DNA polymerase delta,	ath00230:Purine metabolism,ath00240:Pyrimidine metabolism,ath01100:Metabolic pathways,ath03030:DNA replication,ath03410:Base excision repair,ath03420:Nucleotide excision repair,ath03430:Mismatch repair,ath03440:Homologous recombination,		SM00486:POLBc,	4Fe-4S,Alternative splicing,Complete proteome,DNA replication,DNA-binding,DNA-directed DNA polymerase,Exonuclease,Hydrolase,Iron,Iron-sulfur,Metal-binding,Nuclease,Nucleotidyltransferase,Nucleus,Reference proteome,Transferase,Zinc,Zinc-finger,	chain:DNA polymerase delta catalytic subunit,zinc finger region:C4-type,
NODE_144924_length_1791_cov_4.693467	NP_001317920	64.167	3.38e-92	291	flavin monooxygenase-like protein(FZY2)	Solanum lycopersicum		GO:0055114~oxidation-reduction process,		GO:0004497~monooxygenase activity,GO:0004499~N,N-dimethylaniline monooxygenase activity,GO:0050660~flavin adenine dinucleotide binding,GO:0050661~NADP binding,	IPR000103:Pyridine nucleotide-disulphide oxidoreductase, class-II,IPR020946:Flavin monooxygenase-like,IPR023753:Pyridine nucleotide-disulphide oxidoreductase, FAD/NAD(P)-binding domain,	sly00380:Tryptophan metabolism,sly01100:Metabolic pathways,			Complete proteome,FAD,Flavoprotein,Monooxygenase,Oxidoreductase,Reference proteome,
NODE_145252_length_2617_cov_4.977837	NP_001142468	46.269	6.94e-43	167	uncharacterized LOC100274676(IDP48)	Zea mays									Complete proteome,Reference proteome,
NODE_14647_length_2705_cov_4.960074	NP_001238450	45.122	1.26e-33	129	uncharacterized LOC100305900(LOC100305900)	Glycine max				GO:0004857~enzyme inhibitor activity,	IPR006501:Pectinesterase inhibitor,			SM00856:SM00856,	Complete proteome,Reference proteome,Signal,
NODE_146643_length_3635_cov_4.640440	NP_001151420	53.763	2.94e-18	88.2	uncharacterized LOC100285053(cl17031_1)	Zea mays		GO:0009058~biosynthetic process,		GO:0003824~catalytic activity,	IPR003719:Phenazine biosynthesis PhzF protein,		PIRSF016184:isomerase, PhzF type,		Complete proteome,Reference proteome,
NODE_616668_length_1163_cov_3.981943	NP_001151420	50	7.99e-10	60.8	uncharacterized LOC100285053(cl17031_1)	Zea mays		GO:0009058~biosynthetic process,		GO:0003824~catalytic activity,	IPR003719:Phenazine biosynthesis PhzF protein,		PIRSF016184:isomerase, PhzF type,		Complete proteome,Reference proteome,
NODE_147267_length_2596_cov_5.105547	NP_001278548	69.697	6.56e-36	142	AKIN gamma(LOC100280507)	Zea mays				GO:0003824~catalytic activity,	IPR000644:Cystathionine beta-synthase, core,IPR013785:Aldolase-type TIM barrel,			SM00116:CBS,	Complete proteome,Reference proteome,
NODE_147418_length_1159_cov_4.509923	NP_001145739	39.604	2.47e-09	60.5	uncharacterized LOC100279246(pco147635a)	Zea mays			GO:0005829~cytosol,		IPR027450:Alpha-ketoglutarate-dependent dioxygenase AlkB-like,				Complete proteome,Reference proteome,
NODE_147798_length_2159_cov_5.225104	NP_001241559	86.55	2.26e-99	312	uroporphyrinogen decarboxylase, chloroplastic-like(LOC100800753)	Glycine max		GO:0006782~protoporphyrinogen IX biosynthetic process,GO:0006783~heme biosynthetic process,	GO:0005829~cytosol,	GO:0004853~uroporphyrinogen decarboxylase activity,	IPR000257:Uroporphyrinogen decarboxylase (URO-D),IPR006361:Uroporphyrinogen decarboxylase HemE,	gmx00860:Porphyrin and chlorophyll metabolism,gmx01100:Metabolic pathways,gmx01110:Biosynthesis of secondary metabolites,			Complete proteome,Decarboxylase,Lyase,Porphyrin biosynthesis,Reference proteome,
NODE_147798_length_2159_cov_5.225104	NP_001105610	85.38	4.26e-99	312	lesion22(les22)	Zea mays		GO:0006782~protoporphyrinogen IX biosynthetic process,GO:0015995~chlorophyll biosynthetic process,	GO:0009507~chloroplast,	GO:0004853~uroporphyrinogen decarboxylase activity,	IPR000257:Uroporphyrinogen decarboxylase (URO-D),IPR006361:Uroporphyrinogen decarboxylase HemE,	zma00860:Porphyrin and chlorophyll metabolism,zma01100:Metabolic pathways,zma01110:Biosynthesis of secondary metabolites,			Chlorophyll biosynthesis,Chloroplast,Complete proteome,Decarboxylase,Lyase,Plastid,Porphyrin biosynthesis,Reference proteome,Transit peptide,	binding site:Substrate,chain:Uroporphyrinogen decarboxylase, chloroplastic,region of interest:Substrate binding,site:Transition state stabilizer,transit peptide:Chloroplast,
NODE_147798_length_2159_cov_5.225104	NP_001312840	85.965	7.34e-99	311	uroporphyrinogen decarboxylase, chloroplastic(LOC107813684)	Nicotiana tabacum		GO:0006782~protoporphyrinogen IX biosynthetic process,GO:0015995~chlorophyll biosynthetic process,	GO:0009507~chloroplast,	GO:0004853~uroporphyrinogen decarboxylase activity,	IPR000257:Uroporphyrinogen decarboxylase (URO-D),IPR006361:Uroporphyrinogen decarboxylase HemE,				3D-structure,Chlorophyll biosynthesis,Chloroplast,Decarboxylase,Lyase,Plastid,Porphyrin biosynthesis,Transit peptide,
NODE_14809_length_1374_cov_4.355895	NP_001239880	77.66	5.87e-45	163	30S ribosomal protein S1, chloroplastic-like(LOC100812847)	Glycine max		GO:0006412~translation,	GO:0005840~ribosome,	GO:0003723~RNA binding,GO:0003735~structural constituent of ribosome,	IPR000110:Ribosomal protein S1,IPR003029:Ribosomal protein S1, RNA-binding domain,IPR012340:Nucleic acid-binding, OB-fold,IPR022967:RNA-binding domain, S1,	gmx03010:Ribosome,		SM00316:SM00316,	Complete proteome,Reference proteome,
NODE_14809_length_1374_cov_4.355895	NP_001239880	63.235	3.56e-22	99.8	30S ribosomal protein S1, chloroplastic-like(LOC100812847)	Glycine max		GO:0006412~translation,	GO:0005840~ribosome,	GO:0003723~RNA binding,GO:0003735~structural constituent of ribosome,	IPR000110:Ribosomal protein S1,IPR003029:Ribosomal protein S1, RNA-binding domain,IPR012340:Nucleic acid-binding, OB-fold,IPR022967:RNA-binding domain, S1,	gmx03010:Ribosome,		SM00316:SM00316,	Complete proteome,Reference proteome,
NODE_148373_length_2307_cov_4.851756	NP_001240059	80.263	7.02e-34	136	basic leucine zipper and W2 domain-containing protein 2-like(LOC100789838)	Glycine max					IPR003307:W2 domain,IPR016021:MIF4-like, type 1/2/3,IPR016024:Armadillo-type fold,			SM00515:eIF5C,	Complete proteome,Reference proteome,
NODE_1483979_length_1148_cov_4.731707	NP_001234329	55.696	1.5e-22	101	ferric-chelate reductase(FRO1)	Solanum lycopersicum			GO:0016021~integral component of membrane,	GO:0016491~oxidoreductase activity,	IPR001834:NADH:cytochrome b5 reductase (CBR),IPR013112:FAD-binding 8,IPR013121:Ferric reductase, NAD binding,IPR013130:Ferric reductase transmembrane component-like domain,IPR017927:Ferredoxin reductase-type FAD-binding domain,				Complete proteome,Membrane,Oxidoreductase,Reference proteome,Transmembrane,Transmembrane helix,
NODE_1485446_length_1147_cov_4.609416	NP_001315570	39.779	2.28e-18	88.6	E3 SUMO-protein ligase SIZ1(SIZ1)	Solanum lycopersicum		GO:0016049~cell growth,GO:0031668~cellular response to extracellular stimulus,	GO:0005634~nucleus,	GO:0008270~zinc ion binding,GO:0016874~ligase activity,GO:0019789~SUMO transferase activity,	IPR001965:Zinc finger, PHD-type,IPR003034:SAP domain,IPR004181:Zinc finger, MIZ-type,IPR011011:Zinc finger, FYVE/PHD-type,IPR013083:Zinc finger, RING/FYVE/PHD-type,IPR019786:Zinc finger, PHD-type, conserved site,IPR019787:Zinc finger, PHD-finger,			SM00249:PHD,SM00513:SAP,	Complete proteome,Ligase,Metal-binding,Reference proteome,Zinc,Zinc-finger,
NODE_292050_length_1153_cov_7.980052	NP_001315570	80.702	4.49e-18	87.8	E3 SUMO-protein ligase SIZ1(SIZ1)	Solanum lycopersicum		GO:0016049~cell growth,GO:0031668~cellular response to extracellular stimulus,	GO:0005634~nucleus,	GO:0008270~zinc ion binding,GO:0016874~ligase activity,GO:0019789~SUMO transferase activity,	IPR001965:Zinc finger, PHD-type,IPR003034:SAP domain,IPR004181:Zinc finger, MIZ-type,IPR011011:Zinc finger, FYVE/PHD-type,IPR013083:Zinc finger, RING/FYVE/PHD-type,IPR019786:Zinc finger, PHD-type, conserved site,IPR019787:Zinc finger, PHD-finger,			SM00249:PHD,SM00513:SAP,	Complete proteome,Ligase,Metal-binding,Reference proteome,Zinc,Zinc-finger,
NODE_148756_length_1321_cov_4.892506	NP_566758	91.176	6.17e-07	51.6	endoplasmic reticulum retention defective 2B(ERD2B)	Arabidopsis thaliana		GO:0006621~protein retention in ER lumen,GO:0010204~defense response signaling pathway, resistance gene-independent,GO:0015031~protein transport,GO:0016192~vesicle-mediated transport,	GO:0000139~Golgi membrane,GO:0005739~mitochondrion,GO:0005789~endoplasmic reticulum membrane,GO:0005794~Golgi apparatus,GO:0016021~integral component of membrane,	GO:0004872~receptor activity,GO:0046923~ER retention sequence binding,	IPR000133:ER lumen protein retaining receptor,				Complete proteome,Endoplasmic reticulum,ER-Golgi transport,Golgi apparatus,Membrane,Protein transport,Receptor,Reference proteome,Transmembrane,Transmembrane helix,Transport,
NODE_148756_length_1321_cov_4.892506	NP_001241529	91.176	6.64e-07	51.2	ER lumen protein retaining receptor-like(LOC100780011)	Glycine max		GO:0006621~protein retention in ER lumen,GO:0015031~protein transport,	GO:0005789~endoplasmic reticulum membrane,GO:0016021~integral component of membrane,	GO:0046923~ER retention sequence binding,	IPR000133:ER lumen protein retaining receptor,				Complete proteome,Endoplasmic reticulum,Membrane,Protein transport,Receptor,Reference proteome,Signal,Transmembrane,Transmembrane helix,Transport,
NODE_14895_length_2566_cov_5.925955	NP_001169789	44.805	1.74e-28	121	uncharacterized LOC100383679(LOC100383679)	Zea mays			GO:0016021~integral component of membrane,		IPR022227:Protein of unknown function DUF3754,				Complete proteome,Membrane,Reference proteome,Transmembrane,Transmembrane helix,
NODE_149377_length_1064_cov_5.749060	NP_001151339	86.364	5.88e-18	86.7	uncharacterized LOC100192644(LOC100192644)	Zea mays				GO:0004672~protein kinase activity,GO:0005524~ATP binding,	IPR000719:Protein kinase, catalytic domain,IPR001245:Serine-threonine/tyrosine-protein kinase catalytic domain,IPR011009:Protein kinase-like domain,IPR011990:Tetratricopeptide-like helical,	zma04075:Plant hormone signal transduction,			Complete proteome,Reference proteome,
NODE_543819_length_1276_cov_4.260188	NP_001151339	91.111	1.75e-20	95.1	uncharacterized LOC100192644(LOC100192644)	Zea mays				GO:0004672~protein kinase activity,GO:0005524~ATP binding,	IPR000719:Protein kinase, catalytic domain,IPR001245:Serine-threonine/tyrosine-protein kinase catalytic domain,IPR011009:Protein kinase-like domain,IPR011990:Tetratricopeptide-like helical,	zma04075:Plant hormone signal transduction,			Complete proteome,Reference proteome,
NODE_149960_length_2507_cov_3.935381	NP_001304109	45.062	4.42e-111	365	hypothetical protein(LOC100192728)	Zea mays					IPR003593:AAA+ ATPase domain,IPR027417:P-loop containing nucleoside triphosphate hydrolase,			SM00382:AAA,	Complete proteome,Reference proteome,
NODE_150431_length_2059_cov_5.287033	NP_563880	95	2.25e-16	82.4	translation initiation factor 3 subunit H1(TIF3H1)	Arabidopsis thaliana		GO:0001731~formation of translation preinitiation complex,GO:0006413~translational initiation,GO:0009733~response to auxin,GO:0009737~response to abscisic acid,GO:0009738~abscisic acid-activated signaling pathway,GO:0009744~response to sucrose,GO:0009749~response to glucose,GO:0034286~response to maltose,GO:0045948~positive regulation of translational initiation,	GO:0005737~cytoplasm,GO:0005829~cytosol,GO:0005852~eukaryotic translation initiation factor 3 complex,GO:0016282~eukaryotic 43S preinitiation complex,GO:0033290~eukaryotic 48S preinitiation complex,GO:0042788~polysomal ribosome,	GO:0003743~translation initiation factor activity,GO:0005515~protein binding,	IPR000555:JAB1/Mov34/MPN/PAD-1,IPR027524:Eukaryotic translation initiation factor 3 subunit H,	ath03013:RNA transport,		SM00232:JAB_MPN,	Abscisic acid signaling pathway,Alternative splicing,Complete proteome,Cytoplasm,Initiation factor,Phosphoprotein,Protein biosynthesis,Reference proteome,Translation regulation,	chain:Eukaryotic translation initiation factor 3 subunit H,domain:MPN,sequence conflict,
NODE_1506057_length_1097_cov_4.143117	NP_001239829	90.698	4.97e-23	87.8	phytochrome-associated serine/threonine protein phosphatase-like(LOC100820006)	Glycine max				GO:0004721~phosphoprotein phosphatase activity,	IPR004843:Metallophosphoesterase domain,IPR006186:Serine/threonine-specific protein phosphatase/bis(5-nucleosyl)-tetraphosphatase,			SM00156:PP2Ac,	Complete proteome,Hydrolase,Reference proteome,
NODE_596100_length_1820_cov_4.939011	NP_001239829	100	1.29e-30	105	phytochrome-associated serine/threonine protein phosphatase-like(LOC100820006)	Glycine max				GO:0004721~phosphoprotein phosphatase activity,	IPR004843:Metallophosphoesterase domain,IPR006186:Serine/threonine-specific protein phosphatase/bis(5-nucleosyl)-tetraphosphatase,			SM00156:PP2Ac,	Complete proteome,Hydrolase,Reference proteome,
NODE_83111_length_1671_cov_4.964692	NP_001239829	92.593	3.57e-08	56.6	phytochrome-associated serine/threonine protein phosphatase-like(LOC100820006)	Glycine max				GO:0004721~phosphoprotein phosphatase activity,	IPR004843:Metallophosphoesterase domain,IPR006186:Serine/threonine-specific protein phosphatase/bis(5-nucleosyl)-tetraphosphatase,			SM00156:PP2Ac,	Complete proteome,Hydrolase,Reference proteome,
NODE_1506311_length_2046_cov_3.992180	NP_001235730	75	8.28e-12	65.1	uncharacterized LOC100306486(LOC100306486)	Glycine max		GO:0000398~mRNA splicing, via spliceosome,	GO:0005681~spliceosomal complex,		IPR004123:mRNA splicing factor, thioredoxin-like U5 snRNP,IPR012336:Thioredoxin-like fold,		PIRSF017199:thioredoxin-like protein, 4A/4B type,	SM01410:SM01410,
NODE_151190_length_2809_cov_5.108935	NP_001169418	65.686	3.9e-33	135	putative translation initiation factor family protein(LOC100383287)	Zea mays				GO:0003743~translation initiation factor activity,GO:0003924~GTPase activity,GO:0005525~GTP binding,	IPR000795:Elongation factor, GTP-binding domain,IPR004161:Translation elongation factor EFTu/EF1A, domain 2,IPR009000:Translation elongation/initiation factor/Ribosomal, beta-barrel,IPR009001:Translation elongation factor EF1A/initiation factor IF2gamma, C-terminal,IPR015256:Translation initiation factor 2, gamma subunit, C-terminal,IPR027417:P-loop containing nucleoside triphosphate hydrolase,	zma03013:RNA transport,			Complete proteome,Initiation factor,Protein biosynthesis,Reference proteome,
NODE_151352_length_2637_cov_4.386045	NP_001234301	36.122	1.41e-35	140	WRKY transcription factor 1(LOC100301944)	Solanum lycopersicum				GO:0003700~transcription factor activity, sequence-specific DNA binding,GO:0043565~sequence-specific DNA binding,	IPR003657:DNA-binding WRKY,			SM00774:WRKY,	Complete proteome,Reference proteome,
NODE_151352_length_2637_cov_4.386045	NP_001267919	45.455	4.3e-36	140	probable WRKY transcription factor 40-like(LOC100253480)	Vitis vinifera				GO:0003700~transcription factor activity, sequence-specific DNA binding,GO:0043565~sequence-specific DNA binding,	IPR003657:DNA-binding WRKY,			SM00774:WRKY,
NODE_151352_length_2637_cov_4.386045	NP_001312579	39.806	6.02e-34	135	probable WRKY transcription factor 40(LOC107798622)	Nicotiana tabacum				GO:0003700~transcription factor activity, sequence-specific DNA binding,GO:0043565~sequence-specific DNA binding,	IPR003657:DNA-binding WRKY,			SM00774:WRKY,
NODE_37819_length_2227_cov_4.231702	NP_001312579	67.188	1.12e-27	90.1	probable WRKY transcription factor 40(LOC107798622)	Nicotiana tabacum				GO:0003700~transcription factor activity, sequence-specific DNA binding,GO:0043565~sequence-specific DNA binding,	IPR003657:DNA-binding WRKY,			SM00774:WRKY,
NODE_151692_length_1775_cov_3.993239	NP_001241568	30.928	4.33e-10	62.8	transcription factor bZIP58(BZIP58)	Glycine max		GO:0045893~positive regulation of transcription, DNA-templated,	GO:0005634~nucleus,	GO:0000977~RNA polymerase II regulatory region sequence-specific DNA binding,GO:0003700~transcription factor activity, sequence-specific DNA binding,	IPR004827:Basic-leucine zipper domain,			SM00338:BRLZ,	Complete proteome,Reference proteome,
NODE_1517364_length_1377_cov_4.668119	NP_001240918	56.977	3.07e-19	90.9	shaggy-related protein kinase kappa-like(LOC100820098)	Glycine max				GO:0004674~protein serine/threonine kinase activity,GO:0005524~ATP binding,	IPR000719:Protein kinase, catalytic domain,IPR008271:Serine/threonine-protein kinase, active site,IPR011009:Protein kinase-like domain,IPR017441:Protein kinase, ATP binding site,	gmx04931:Insulin resistance,		SM00220:S_TKc,	ATP-binding,Complete proteome,Kinase,Nucleotide-binding,Reference proteome,Serine/threonine-protein kinase,Transferase,
NODE_151913_length_1752_cov_4.291667	NP_001168640	76.923	5.89e-28	120	uncharacterized LOC100382426(LOC100382426)	Zea mays				GO:0016866~intramolecular transferase activity,	IPR002365:Terpene synthase, conserved site,IPR008930:Terpenoid cyclases/protein prenyltransferase alpha-alpha toroid,IPR018333:Squalene cyclase,	zma00100:Steroid biosynthesis,zma01100:Metabolic pathways,zma01110:Biosynthesis of secondary metabolites,			Complete proteome,Isomerase,Reference proteome,Repeat,
NODE_642217_length_2007_cov_4.658695	NP_001168640	66.667	7.02e-17	85.1	uncharacterized LOC100382426(LOC100382426)	Zea mays				GO:0016866~intramolecular transferase activity,	IPR002365:Terpene synthase, conserved site,IPR008930:Terpenoid cyclases/protein prenyltransferase alpha-alpha toroid,IPR018333:Squalene cyclase,	zma00100:Steroid biosynthesis,zma01100:Metabolic pathways,zma01110:Biosynthesis of secondary metabolites,			Complete proteome,Isomerase,Reference proteome,Repeat,
NODE_907074_length_1346_cov_4.577266	NP_001168640	55.882	1.46e-17	87	uncharacterized LOC100382426(LOC100382426)	Zea mays				GO:0016866~intramolecular transferase activity,	IPR002365:Terpene synthase, conserved site,IPR008930:Terpenoid cyclases/protein prenyltransferase alpha-alpha toroid,IPR018333:Squalene cyclase,	zma00100:Steroid biosynthesis,zma01100:Metabolic pathways,zma01110:Biosynthesis of secondary metabolites,			Complete proteome,Isomerase,Reference proteome,Repeat,
NODE_151913_length_1752_cov_4.291667	NP_001311688	76.923	1.81e-27	119	cycloartenol Synthase-like(LOC107762593)	Nicotiana tabacum				GO:0016866~intramolecular transferase activity,	IPR002365:Terpene synthase, conserved site,IPR008930:Terpenoid cyclases/protein prenyltransferase alpha-alpha toroid,IPR018333:Squalene cyclase,				Isomerase,Repeat,
NODE_446229_length_1219_cov_16.245283	NP_001311688	63.636	3.12e-06	50.8	cycloartenol Synthase-like(LOC107762593)	Nicotiana tabacum				GO:0016866~intramolecular transferase activity,	IPR002365:Terpene synthase, conserved site,IPR008930:Terpenoid cyclases/protein prenyltransferase alpha-alpha toroid,IPR018333:Squalene cyclase,				Isomerase,Repeat,
NODE_605839_length_1348_cov_4.448813	NP_001311688	70.312	6.74e-21	97.4	cycloartenol Synthase-like(LOC107762593)	Nicotiana tabacum				GO:0016866~intramolecular transferase activity,	IPR002365:Terpene synthase, conserved site,IPR008930:Terpenoid cyclases/protein prenyltransferase alpha-alpha toroid,IPR018333:Squalene cyclase,				Isomerase,Repeat,
NODE_907074_length_1346_cov_4.577266	NP_001311688	51.471	6.41e-16	82	cycloartenol Synthase-like(LOC107762593)	Nicotiana tabacum				GO:0016866~intramolecular transferase activity,	IPR002365:Terpene synthase, conserved site,IPR008930:Terpenoid cyclases/protein prenyltransferase alpha-alpha toroid,IPR018333:Squalene cyclase,				Isomerase,Repeat,
NODE_1521753_length_1024_cov_4.464844	NP_568078	46.939	2.22e-18	82	transmembrane protein(AT4G40045)	Arabidopsis thaliana			GO:0009507~chloroplast,GO:0016021~integral component of membrane,						Complete proteome,Membrane,Reference proteome,Transmembrane,Transmembrane helix,
NODE_152333_length_1659_cov_5.072333	NP_001315798	51.25	1.41e-36	145	F-box/LRR-repeat protein 13-like(LOC103424794)	Malus domestica					IPR001611:Leucine-rich repeat,IPR006553:Leucine-rich repeat, cysteine-containing subtype,			SM00367:LRR_CC,
NODE_152510_length_2272_cov_5.092430	NP_001146459	63.889	5.04e-21	99.8	putative DEAD-box ATP-dependent RNA helicase family protein(LOC100280046)	Zea mays			GO:0009507~chloroplast,	GO:0003676~nucleic acid binding,GO:0004386~helicase activity,GO:0005524~ATP binding,	IPR001650:Helicase, C-terminal,IPR011545:DNA/RNA helicase, DEAD/DEAH box type, N-terminal,IPR014001:Helicase, superfamily 1/2, ATP-binding domain,IPR014014:RNA helicase, DEAD-box type, Q motif,IPR027417:P-loop containing nucleoside triphosphate hydrolase,			SM00487:DEXDc,SM00490:HELICc,	ATP-binding,Complete proteome,Helicase,Hydrolase,Nucleotide-binding,Reference proteome,
NODE_152573_length_1718_cov_5.453434	NP_001105138	100	1.39e-08	57.4	maize 20S proteasome alpha subunit(paa)	Zea mays		GO:0006511~ubiquitin-dependent protein catabolic process,GO:0010045~response to nickel cation,GO:0032025~response to cobalt ion,GO:0046686~response to cadmium ion,	GO:0005634~nucleus,GO:0005737~cytoplasm,GO:0019773~proteasome core complex, alpha-subunit complex,	GO:0004298~threonine-type endopeptidase activity,	IPR000426:Proteasome, alpha-subunit, N-terminal domain,IPR001353:Proteasome, subunit alpha/beta,IPR023332:Proteasome A-type subunit,	zma03050:Proteasome,		SM00948:SM00948,	Cytoplasm,Hydrolase,Nucleus,Protease,Proteasome,Threonine protease,
NODE_152573_length_1718_cov_5.453434	NP_198409	92	1.1e-07	54.7	proteasome alpha subunit A1(PAA1)	Arabidopsis thaliana	Inorganic ion transport and metabolism,	GO:0006511~ubiquitin-dependent protein catabolic process,GO:0010043~response to zinc ion,	GO:0000502~proteasome complex,GO:0005634~nucleus,GO:0005737~cytoplasm,GO:0005774~vacuolar membrane,GO:0005829~cytosol,GO:0005839~proteasome core complex,GO:0019773~proteasome core complex, alpha-subunit complex,	GO:0004298~threonine-type endopeptidase activity,GO:0008233~peptidase activity,	IPR000426:Proteasome, alpha-subunit, N-terminal domain,IPR001353:Proteasome, subunit alpha/beta,IPR023332:Proteasome A-type subunit,	ath03050:Proteasome,		SM00948:SM00948,	Complete proteome,Cytoplasm,Hydrolase,Nucleus,Protease,Proteasome,Reference proteome,Threonine protease,	active site:4-aspartylphosphate intermediate,chain:Proteasome subunit alpha type-6-A,chain:Putative copper-transporting ATPase PAA1,compositionally biased region:Poly-Gly,domain:HMA,metal ion-binding site:Copper,metal ion-binding site:Magnesium,sequence conflict,sequence variant,topological domain:Cytoplasmic,topological domain:Extracellular,transmembrane region,
NODE_152934_length_1054_cov_4.629981	NP_001289788	46.154	8.38e-06	48.9	transcription factor TGA2(LOC104588531)	Nelumbo nucifera		GO:0006351~transcription, DNA-templated,		GO:0003700~transcription factor activity, sequence-specific DNA binding,GO:0043565~sequence-specific DNA binding,	IPR004827:Basic-leucine zipper domain,IPR025422:DOG1 domain,			SM00338:BRLZ,	Coiled coil,
NODE_153188_length_3074_cov_4.639557	NP_564000	59.42	2.2e-15	80.1	interactor of constitutive active ROPs protein(AT1G16520)	Arabidopsis thaliana		GO:0006810~transport,	GO:0005634~nucleus,GO:0005886~plasma membrane,GO:0016021~integral component of membrane,	GO:0022857~transmembrane transporter activity,					Coiled coil,Complete proteome,Reference proteome,
NODE_369203_length_2014_cov_9.393248	NP_564000	78.571	9.86e-06	49.7	interactor of constitutive active ROPs protein(AT1G16520)	Arabidopsis thaliana		GO:0006810~transport,	GO:0005634~nucleus,GO:0005886~plasma membrane,GO:0016021~integral component of membrane,	GO:0022857~transmembrane transporter activity,					Coiled coil,Complete proteome,Reference proteome,
NODE_153188_length_3074_cov_4.639557	NP_001144750	56.338	3.36e-13	73.6	uncharacterized LOC100277799(si606001c09)	Zea mays			GO:0016021~integral component of membrane,	GO:0022857~transmembrane transporter activity,					Coiled coil,Complete proteome,Reference proteome,
NODE_369203_length_2014_cov_9.393248	NP_001144750	78.571	1.44e-06	52.4	uncharacterized LOC100277799(si606001c09)	Zea mays			GO:0016021~integral component of membrane,	GO:0022857~transmembrane transporter activity,					Coiled coil,Complete proteome,Reference proteome,
NODE_1537748_length_1356_cov_4.814897	NP_001235950	87.5	1.66e-18	74.3	uncharacterized LOC100499781(LOC100499781)	Glycine max		GO:0000028~ribosomal small subunit assembly,GO:0006412~translation,	GO:0022627~cytosolic small ribosomal subunit,	GO:0003723~RNA binding,GO:0003735~structural constituent of ribosome,	IPR002222:Ribosomal protein S19/S15,IPR005713:Ribosomal protein S19A/S15e,IPR020934:Ribosomal protein S19 conserved site,IPR023575:Ribosomal protein S19, superfamily,	gmx03010:Ribosome,	PIRSF002144:ribosomal protein, S19p/S19a/S15e/organellar S19 types,		Complete proteome,Reference proteome,Ribonucleoprotein,Ribosomal protein,
NODE_154685_length_3141_cov_5.560649	NP_001136699	86.792	1.81e-15	82.4	GNAT transcription factor(GNAT16)	Zea mays				GO:0008080~N-acetyltransferase activity,GO:0051536~iron-sulfur cluster binding,	IPR000182:GNAT domain,IPR005910:Histone acetyltransferase ELP3,IPR006638:Elongator protein 3/MiaB/NifB,IPR007197:Radical SAM,IPR016181:Acyl-CoA N-acyltransferase,IPR023404:Radical SAM, alpha/beta horseshoe,		PIRSF005669:histone acetyltransferase with radical SAM domain, Elp3 type,	SM00729:Elp3,	Complete proteome,Reference proteome,
NODE_154685_length_3141_cov_5.560649	NP_001169659	86.792	2.37e-15	82	uncharacterized LOC100383540(LOC100383540)	Zea mays				GO:0003824~catalytic activity,GO:0008080~N-acetyltransferase activity,GO:0051536~iron-sulfur cluster binding,	IPR000182:GNAT domain,IPR005910:Histone acetyltransferase ELP3,IPR006638:Elongator protein 3/MiaB/NifB,IPR007197:Radical SAM,IPR016181:Acyl-CoA N-acyltransferase,IPR023404:Radical SAM, alpha/beta horseshoe,		PIRSF005669:histone acetyltransferase with radical SAM domain, Elp3 type,	SM00729:Elp3,	Complete proteome,Reference proteome,
NODE_155047_length_5021_cov_8.598486	NP_001234400	55.556	5.82e-14	75.1	chitinase(CHI17)	Solanum lycopersicum		GO:0000272~polysaccharide catabolic process,GO:0006032~chitin catabolic process,GO:0006040~amino sugar metabolic process,GO:0006952~defense response,GO:0009607~response to biotic stimulus,GO:0016998~cell wall macromolecule catabolic process,	GO:0005615~extracellular space,GO:0005622~intracellular,	GO:0004568~chitinase activity,	IPR000726:Glycoside hydrolase, family 19, catalytic,IPR016283:Glycoside hydrolase, family 19,IPR023346:Lysozyme-like domain,		PIRSF001060:Endochitinase,		Carbohydrate metabolism,Chitin degradation,Complete proteome,Direct protein sequencing,Disulfide bond,Glycosidase,Hydrolase,Pathogenesis-related protein,Plant defense,Polysaccharide degradation,Reference proteome,Secreted,Signal,	chain:Acidic 27 kDa endochitinase,disulfide bond,signal peptide,
NODE_156545_length_1409_cov_5.158978	NP_001319679	83.333	7.04e-10	55.8	Ribosomal protein S14p/S29e family protein(AT3G44010)	Arabidopsis thaliana		GO:0006412~translation,	GO:0005840~ribosome,GO:0022627~cytosolic small ribosomal subunit,	GO:0003735~structural constituent of ribosome,GO:0008270~zinc ion binding,	IPR001209:Ribosomal protein S14,	ath03010:Ribosome,			Complete proteome,Metal-binding,Reference proteome,Ribonucleoprotein,Ribosomal protein,Zinc,	chain:40S ribosomal protein S29,metal ion-binding site:Zinc,sequence conflict,
NODE_156642_length_1081_cov_5.620721	NP_001304388	37.368	1.9e-34	132	E3 ubiquitin-protein ligase ATL42-like(LOC100806950)	Glycine max		GO:0043161~proteasome-mediated ubiquitin-dependent protein catabolic process,	GO:0016021~integral component of membrane,	GO:0008270~zinc ion binding,GO:0061630~ubiquitin protein ligase activity,	IPR001841:Zinc finger, RING-type,IPR013083:Zinc finger, RING/FYVE/PHD-type,			SM00184:RING,	Complete proteome,Membrane,Reference proteome,Signal,Transmembrane,Transmembrane helix,
NODE_434532_length_1481_cov_5.086428	NP_001304388	47.059	8.62e-19	90.1	E3 ubiquitin-protein ligase ATL42-like(LOC100806950)	Glycine max		GO:0043161~proteasome-mediated ubiquitin-dependent protein catabolic process,	GO:0016021~integral component of membrane,	GO:0008270~zinc ion binding,GO:0061630~ubiquitin protein ligase activity,	IPR001841:Zinc finger, RING-type,IPR013083:Zinc finger, RING/FYVE/PHD-type,			SM00184:RING,	Complete proteome,Membrane,Reference proteome,Signal,Transmembrane,Transmembrane helix,
NODE_737812_length_1524_cov_3.765748	NP_001304388	50.847	1.2e-12	66.6	E3 ubiquitin-protein ligase ATL42-like(LOC100806950)	Glycine max		GO:0043161~proteasome-mediated ubiquitin-dependent protein catabolic process,	GO:0016021~integral component of membrane,	GO:0008270~zinc ion binding,GO:0061630~ubiquitin protein ligase activity,	IPR001841:Zinc finger, RING-type,IPR013083:Zinc finger, RING/FYVE/PHD-type,			SM00184:RING,	Complete proteome,Membrane,Reference proteome,Signal,Transmembrane,Transmembrane helix,
NODE_156642_length_1081_cov_5.620721	NP_194618	42.553	2.86e-27	113	RING/U-box superfamily protein(AT4G28890)	Arabidopsis thaliana		GO:0016567~protein ubiquitination,GO:0043161~proteasome-mediated ubiquitin-dependent protein catabolic process,	GO:0016021~integral component of membrane,	GO:0004842~ubiquitin-protein transferase activity,GO:0008270~zinc ion binding,GO:0016874~ligase activity,GO:0061630~ubiquitin protein ligase activity,	IPR001841:Zinc finger, RING-type,IPR013083:Zinc finger, RING/FYVE/PHD-type,			SM00184:RING,	Complete proteome,Membrane,Metal-binding,Reference proteome,Signal,Transferase,Transmembrane,Transmembrane helix,Ubl conjugation pathway,Zinc,Zinc-finger,	chain:RING-H2 finger protein ATL4J,compositionally biased region:Poly-Glu,signal peptide,transmembrane region,zinc finger region:RING-type; atypical,
NODE_156776_length_1737_cov_5.519862	NP_001329050	80.769	8.89e-07	48.5	transmembrane protein(AT4G25225)	Arabidopsis thaliana									Complete proteome,Reference proteome,
NODE_156950_length_1694_cov_4.563164	NP_001130798	78.261	3.88e-06	40.4	uncharacterized LOC100191902(pco069598)	Zea mays				GO:0004721~phosphoprotein phosphatase activity,GO:0016787~hydrolase activity,	IPR004843:Metallophosphoesterase domain,IPR006186:Serine/threonine-specific protein phosphatase/bis(5-nucleosyl)-tetraphosphatase,	zma03015:mRNA surveillance pathway,		SM00156:PP2Ac,	Complete proteome,Hydrolase,Reference proteome,
NODE_157160_length_1086_cov_4.354512	NP_001314130	54.348	1.45e-58	194	peroxidase 43-like(LOC107922335)	Gossypium hirsutum		GO:0006979~response to oxidative stress,GO:0042744~hydrogen peroxide catabolic process,	GO:0005618~cell wall,GO:0005737~cytoplasm,GO:0009519~middle lamella,GO:0009531~secondary cell wall,	GO:0004601~peroxidase activity,GO:0020037~heme binding,GO:0046872~metal ion binding,	IPR000823:Plant peroxidase,IPR002016:Haem peroxidase, plant/fungal/bacterial,IPR010255:Haem peroxidase,IPR019793:Peroxidases heam-ligand binding site,				Calcium,Disulfide bond,Heme,Hydrogen peroxide,Iron,Metal-binding,Oxidoreductase,Peroxidase,Secreted,Signal,
NODE_157160_length_1086_cov_4.354512	NP_194328	50.543	1.37e-52	178	peroxidase superfamily protein(AT4G25980)	Arabidopsis thaliana		GO:0006979~response to oxidative stress,GO:0009664~plant-type cell wall organization,GO:0042744~hydrogen peroxide catabolic process,	GO:0005576~extracellular region,GO:0009505~plant-type cell wall,	GO:0004601~peroxidase activity,GO:0020037~heme binding,GO:0046872~metal ion binding,	IPR000823:Plant peroxidase,IPR002016:Haem peroxidase, plant/fungal/bacterial,IPR010255:Haem peroxidase,IPR019793:Peroxidases heam-ligand binding site,	ath00940:Phenylpropanoid biosynthesis,ath01100:Metabolic pathways,ath01110:Biosynthesis of secondary metabolites,			Calcium,Complete proteome,Disulfide bond,Glycoprotein,Heme,Hydrogen peroxide,Iron,Metal-binding,Oxidoreductase,Peroxidase,Reference proteome,Secreted,Signal,	active site:Proton acceptor,binding site:Substrate; via carbonyl oxygen,chain:Peroxidase 43,disulfide bond,glycosylation site:N-linked (GlcNAc...),metal ion-binding site:Calcium 1,metal ion-binding site:Calcium 1; via carbonyl oxygen,metal ion-binding site:Calcium 2,metal ion-binding site:Iron (heme axial ligand),signal peptide,site:Transition state stabilizer,
NODE_157384_length_1247_cov_4.660786	NP_182030	59.006	4.9e-56	189	Matrixin family protein(AT2G45040)	Arabidopsis thaliana		GO:0006508~proteolysis,	GO:0005576~extracellular region,GO:0005886~plasma membrane,GO:0031012~extracellular matrix,GO:0031225~anchored component of membrane,	GO:0004222~metalloendopeptidase activity,GO:0008270~zinc ion binding,	IPR001818:Peptidase M10, metallopeptidase,IPR002477:Peptidoglycan binding-like,IPR006026:Peptidase, metallopeptidase,IPR021190:Peptidase M10A,IPR024079:Metallopeptidase, catalytic domain,			SM00235:ZnMc,	Cell membrane,Complete proteome,Glycoprotein,GPI-anchor,Hydrolase,Lipoprotein,Membrane,Metal-binding,Metalloprotease,Protease,Reference proteome,Signal,Zinc,Zymogen,
NODE_157384_length_1247_cov_4.660786	NP_001151749	56.164	1.81e-46	165	metalloendoproteinase 1(LOC100285384)	Zea mays			GO:0031012~extracellular matrix,	GO:0004222~metalloendopeptidase activity,GO:0008270~zinc ion binding,	IPR001818:Peptidase M10, metallopeptidase,IPR002477:Peptidoglycan binding-like,IPR006026:Peptidase, metallopeptidase,IPR021190:Peptidase M10A,IPR024079:Metallopeptidase, catalytic domain,			SM00235:ZnMc,	Complete proteome,Hydrolase,Metal-binding,Metalloprotease,Protease,Reference proteome,Signal,Zinc,
NODE_157655_length_4771_cov_4.471599	NP_001313660	58.095	1.19e-30	131	endoglucanase 5-like(LOC107886827)	Gossypium hirsutum		GO:0030245~cellulose catabolic process,		GO:0008810~cellulase activity,GO:0030246~carbohydrate binding,	IPR001701:Glycoside hydrolase, family 9,IPR008928:Six-hairpin glycosidase-like,IPR012341:Six-hairpin glycosidase,IPR018221:Glycoside hydrolase, family 9, active site,IPR019028:Carbohydrate binding domain CBM49,			SM01063:SM01063,	Carbohydrate metabolism,Cellulose degradation,Glycosidase,Hydrolase,Polysaccharide degradation,Signal,
NODE_160287_length_2038_cov_4.557900	NP_172899	34.375	3.49e-06	51.6	Pentatricopeptide repeat (PPR) superfamily protein(AT1G14470)	Arabidopsis thaliana			GO:0005739~mitochondrion,		IPR002885:Pentatricopeptide repeat,IPR011990:Tetratricopeptide-like helical,				Complete proteome,Reference proteome,Repeat,	chain:Pentatricopeptide repeat-containing protein At1g14470,repeat:PPR 1,repeat:PPR 10,repeat:PPR 11,repeat:PPR 12,repeat:PPR 13,repeat:PPR 14,repeat:PPR 2,repeat:PPR 3,repeat:PPR 4,repeat:PPR 5,repeat:PPR 6,repeat:PPR 7,repeat:PPR 8,repeat:PPR 9,
NODE_762085_length_2260_cov_4.850885	NP_172899	38.489	7.79e-52	190	Pentatricopeptide repeat (PPR) superfamily protein(AT1G14470)	Arabidopsis thaliana			GO:0005739~mitochondrion,		IPR002885:Pentatricopeptide repeat,IPR011990:Tetratricopeptide-like helical,				Complete proteome,Reference proteome,Repeat,	chain:Pentatricopeptide repeat-containing protein At1g14470,repeat:PPR 1,repeat:PPR 10,repeat:PPR 11,repeat:PPR 12,repeat:PPR 13,repeat:PPR 14,repeat:PPR 2,repeat:PPR 3,repeat:PPR 4,repeat:PPR 5,repeat:PPR 6,repeat:PPR 7,repeat:PPR 8,repeat:PPR 9,
NODE_160542_length_2766_cov_4.877079	NP_564860	82.051	1.26e-13	73.6	expansin B2(EXPB2)	Arabidopsis thaliana		GO:0009826~unidimensional cell growth,GO:0009828~plant-type cell wall loosening,GO:0009831~plant-type cell wall modification involved in multidimensional cell growth,GO:0019953~sexual reproduction,	GO:0005576~extracellular region,GO:0005618~cell wall,GO:0016020~membrane,		IPR005795:Major pollen allergen Lol pI,IPR007112:Expansin/pollen allergen, DPBB domain,IPR007117:Expansin, cellulose-binding-like domain,IPR007118:Expansin/Lol pI,IPR009009:Barwin-related endoglucanase,			SM00837:SM00837,	Cell wall,Cell wall biogenesis/degradation,Complete proteome,Disulfide bond,Glycoprotein,Membrane,Reference proteome,Secreted,Signal,	chain:Putative expansin-B2,disulfide bond,domain:Expansin-like CBD,domain:Expansin-like EG45,glycosylation site:N-linked (GlcNAc...),signal peptide,
NODE_160542_length_2766_cov_4.877079	NP_001234859	87.179	1.89e-13	73.2	beta-expansin precursor(LOC100134906)	Solanum lycopersicum		GO:0019953~sexual reproduction,	GO:0005576~extracellular region,GO:0016021~integral component of membrane,		IPR005795:Major pollen allergen Lol pI,IPR007112:Expansin/pollen allergen, DPBB domain,IPR007117:Expansin, cellulose-binding-like domain,IPR007118:Expansin/Lol pI,IPR009009:Barwin-related endoglucanase,			SM00837:SM00837,	Complete proteome,Membrane,Reference proteome,Transmembrane,Transmembrane helix,
NODE_160634_length_2500_cov_4.807600	NP_188799	43.103	5.89e-14	77.4	ERD (early-responsive to dehydration stress) family protein(AT3G21620)	Arabidopsis thaliana	Function unknown,	GO:0006811~ion transport,	GO:0005886~plasma membrane,GO:0016021~integral component of membrane,	GO:0004601~peroxidase activity,	IPR003864:Domain of unknown function DUF221,				Calcium,Complete proteome,Ion channel,Ion transport,Membrane,Reference proteome,Transmembrane,Transmembrane helix,Transport,
NODE_161191_length_2270_cov_5.177974	NP_001312870	30.667	1.51e-06	52.8	uncharacterized LOC107815048(LOC107815048)	Nicotiana tabacum					IPR004252:Transposase, Ptta/En/Spm, plant,				Coiled coil,
NODE_161763_length_2129_cov_4.770315	NP_001140699	37.143	9.81e-06	50.1	uncharacterized LOC100272774(pco144644)	Zea mays		GO:0015031~protein transport,			IPR005061:Domain of unknown function DUF292, eukaryotic,	zma04144:Endocytosis,			Coiled coil,Complete proteome,Reference proteome,
NODE_1621_length_1096_cov_4.444343	NP_187239	64.286	3.93e-06	45.1	Low temperature and salt responsive protein family(RCI2A)	Arabidopsis thaliana		GO:0009409~response to cold,GO:0009737~response to abscisic acid,GO:0042538~hyperosmotic salinity response,	GO:0016021~integral component of membrane,		IPR000612:Proteolipid membrane potential modulator,				Complete proteome,Membrane,Reference proteome,Transmembrane,Transmembrane helix,	chain:Hydrophobic protein RCI2A,transmembrane region,
NODE_162210_length_3585_cov_5.537518	NP_001148458	88.636	3.31e-15	80.9	AT-hook protein 1(LOC100282073)	Zea mays					IPR005175:Domain of unknown function DUF296,				Complete proteome,Reference proteome,
NODE_1622518_length_1135_cov_4.391190	NP_566439	49.462	2.31e-20	90.5	Lojap-related protein(AT3G12930)	Arabidopsis thaliana		GO:0017148~negative regulation of translation,GO:0090071~negative regulation of ribosome biogenesis,	GO:0005739~mitochondrion,GO:0009507~chloroplast,GO:0009570~chloroplast stroma,	GO:0043023~ribosomal large subunit binding,	IPR004394:Protein Iojap/ribosomal silencing factor RsfS,				Chloroplast,Complete proteome,Plastid,Reference proteome,Transit peptide,
NODE_162363_length_1688_cov_4.723341	NP_001152099	32.558	5.63e-06	50.4	carboxyl-terminal peptidase(LOC100285736)	Zea mays					IPR004314:Domain of unknown function DUF239,IPR025521:Domain of unknown function DUF4409,				Signal,
NODE_162836_length_1429_cov_5.522043	NP_001316338	37.815	3.24e-15	79.3	synaptotagmin-1(LOC101264564)	Solanum lycopersicum			GO:0005783~endoplasmic reticulum,GO:0016021~integral component of membrane,	GO:0008289~lipid binding,	IPR000008:C2 calcium-dependent membrane targeting,			SM00239:C2,	Complete proteome,Membrane,Reference proteome,Transmembrane,Transmembrane helix,
NODE_163777_length_1901_cov_5.194108	NP_001144348	51.471	1.69e-38	63.2	uncharacterized LOC100277253(cl12175_1)	Zea mays					IPR006968:Protein of unknown function DUF647,				Complete proteome,Reference proteome,
NODE_165073_length_2750_cov_4.576727	NP_001304220	69.474	3.33e-39	149	bifunctional epoxide hydrolase 2-like(LOC106775412)	Vigna radiata				GO:0016787~hydrolase activity,	IPR000073:Alpha/beta hydrolase fold-1,IPR000639:Epoxide hydrolase-like,				Hydrolase,
NODE_165423_length_2248_cov_4.842082	NP_177359	43.023	6.07e-28	74.3	Major facilitator superfamily protein(AT1G72140)	Arabidopsis thaliana		GO:0006810~transport,GO:0006857~oligopeptide transport,GO:0009624~response to nematode,	GO:0005774~vacuolar membrane,GO:0005886~plasma membrane,GO:0016020~membrane,GO:0016021~integral component of membrane,	GO:0005215~transporter activity,	IPR000109:Proton-dependent oligopeptide transporter family,IPR020846:Major facilitator superfamily domain,				Complete proteome,Membrane,Phosphoprotein,Reference proteome,Transmembrane,Transmembrane helix,Transport,
NODE_165423_length_2248_cov_4.842082	NP_173670	44.186	1.41e-12	72.4	Major facilitator superfamily protein(AT1G22540)	Arabidopsis thaliana		GO:0006857~oligopeptide transport,GO:0015706~nitrate transport,GO:0042938~dipeptide transport,	GO:0005886~plasma membrane,GO:0016020~membrane,GO:0016021~integral component of membrane,	GO:0005215~transporter activity,GO:0042936~dipeptide transporter activity,	IPR000109:Proton-dependent oligopeptide transporter family,IPR018456:PTR2 family proton/oligopeptide symporter, conserved site,IPR020846:Major facilitator superfamily domain,				Complete proteome,Membrane,Phosphoprotein,Reference proteome,Transmembrane,Transmembrane helix,Transport,
NODE_165423_length_2248_cov_4.842082	NP_001168010	47.945	2.85e-27	71.6	uncharacterized LOC100381733(LOC100381733)	Zea mays		GO:0006857~oligopeptide transport,	GO:0016021~integral component of membrane,	GO:0005215~transporter activity,	IPR000109:Proton-dependent oligopeptide transporter family,IPR018456:PTR2 family proton/oligopeptide symporter, conserved site,IPR020846:Major facilitator superfamily domain,				Complete proteome,Membrane,Reference proteome,Transmembrane,Transmembrane helix,
NODE_165665_length_1007_cov_4.957299	NP_001236069	57.143	6.24e-10	61.6	plastid 3-keto-acyl-ACP synthase II-B(KASII-B)	Glycine max		GO:0006633~fatty acid biosynthetic process,		GO:0004315~3-oxoacyl-[acyl-carrier-protein] synthase activity,	IPR014030:Beta-ketoacyl synthase, N-terminal,IPR014031:Beta-ketoacyl synthase, C-terminal,IPR016039:Thiolase-like,IPR017568:3-oxoacyl-[acyl-carrier-protein] synthase 2,IPR018201:Beta-ketoacyl synthase, active site,IPR020841:Polyketide synthase, beta-ketoacyl synthase domain,	gmx00061:Fatty acid biosynthesis,gmx00780:Biotin metabolism,gmx01100:Metabolic pathways,gmx01212:Fatty acid metabolism,		SM00825:SM00825,	Acyltransferase,Complete proteome,Reference proteome,Signal,Transferase,
NODE_1661745_length_1113_cov_4.850853	NP_566059	51.765	5.41e-21	92.4	mesoderm induction early response protein(ATI1)	Arabidopsis thaliana		GO:0071211~protein targeting to vacuole involved in autophagy,GO:1904962~plastid to vacuole vesicle-mediated transport,	GO:0005622~intracellular,GO:0005623~cell,GO:0005634~nucleus,GO:0005783~endoplasmic reticulum,GO:0005789~endoplasmic reticulum membrane,GO:0005829~cytosol,GO:0009570~chloroplast stroma,GO:0016021~integral component of membrane,GO:0031969~chloroplast membrane,GO:0043231~intracellular membrane-bounded organelle,	GO:0005515~protein binding,					Autophagy,Chloroplast,Complete proteome,Endoplasmic reticulum,Membrane,Plastid,Protein transport,Reference proteome,Stress response,Transmembrane,Transmembrane helix,Transport,
NODE_166353_length_2185_cov_4.838902	NP_001149760	68.116	1.66e-16	83.2	syntaxin 32(LOC100283387)	Zea mays		GO:0006886~intracellular protein transport,GO:0016192~vesicle-mediated transport,GO:0061025~membrane fusion,	GO:0005622~intracellular,GO:0016021~integral component of membrane,		IPR000727:Target SNARE coiled-coil domain,IPR006011:Syntaxin, N-terminal,IPR006012:Syntaxin/epimorphin, conserved site,IPR010989:t-SNARE,IPR021538:Integral membrane protein Sed5p,	zma04130:SNARE interactions in vesicular transport,		SM00397:t_SNARE,	Coiled coil,Membrane,Transmembrane,Transmembrane helix,
NODE_166963_length_1713_cov_5.509048	NP_187021	56.41	4.4e-06	51.2	polyribonucleotide nucleotidyltransferase(RIF10)	Arabidopsis thaliana		GO:0006364~rRNA processing,GO:0006397~mRNA processing,GO:0006401~RNA catabolic process,GO:0006402~mRNA catabolic process,GO:0008033~tRNA processing,GO:0010323~negative regulation of isopentenyl diphosphate biosynthetic process, methylerythritol 4-phosphate pathway,GO:0015995~chlorophyll biosynthetic process,GO:0016036~cellular response to phosphate starvation,GO:0016120~carotene biosynthetic proc…	GO:0009507~chloroplast,GO:0009570~chloroplast stroma,	GO:0000175~3'-5'-exoribonuclease activity,GO:0003676~nucleic acid binding,GO:0003723~RNA binding,GO:0004654~polyribonucleotide nucleotidyltransferase activity,	IPR001247:Exoribonuclease, phosphorolytic domain 1,IPR003029:Ribosomal protein S1, RNA-binding domain,IPR004087:K Homology domain,IPR004088:K Homology domain, type 1,IPR012162:Polyribonucleotide nucleotidyltransferase,IPR012340:Nucleic acid-binding, OB-fold,IPR015847:Exoribonuclease, phosphorolytic domain 2,IPR015848:Polynucleotide phosphorylase, phosphorolytic RNA-binding, bacterial/organelle-ty…	ath00230:Purine metabolism,ath00240:Pyrimidine metabolism,ath03018:RNA degradation,		SM00316:SM00316,SM00322:KH,	Chloroplast,Complete proteome,Exonuclease,Hydrolase,mRNA processing,Nuclease,Nucleotidyltransferase,Plastid,Reference proteome,RNA-binding,rRNA processing,Transferase,Transit peptide,tRNA processing,
NODE_168516_length_3293_cov_4.845430	NP_001275419	78.571	7.8e-20	94.7	oligouridylate binding protein-like protein(LOC102577639)	Solanum tuberosum				GO:0000166~nucleotide binding,GO:0003676~nucleic acid binding,	IPR000504:RNA recognition motif domain,IPR012677:Nucleotide-binding, alpha-beta plait,			SM00360:RRM,	Complete proteome,Reference proteome,
NODE_168657_length_1886_cov_4.875398	NP_001312669	86.239	4.13e-64	204	proline-rich receptor-like protein kinase PERK1(LOC107803718)	Nicotiana tabacum			GO:0016021~integral component of membrane,	GO:0004672~protein kinase activity,GO:0005524~ATP binding,	IPR000719:Protein kinase, catalytic domain,IPR001245:Serine-threonine/tyrosine-protein kinase catalytic domain,IPR008271:Serine/threonine-protein kinase, active site,IPR011009:Protein kinase-like domain,IPR017441:Protein kinase, ATP binding site,			SM00220:S_TKc,	Kinase,Membrane,Transferase,Transmembrane,Transmembrane helix,
NODE_168657_length_1886_cov_4.875398	NP_189098	81.739	7.99e-57	204	proline extensin-like receptor kinase 1(PERK1)	Arabidopsis thaliana		GO:0006351~transcription, DNA-templated,GO:0006468~protein phosphorylation,GO:0009611~response to wounding,GO:0009620~response to fungus,GO:0046777~protein autophosphorylation,	GO:0005737~cytoplasm,GO:0005886~plasma membrane,GO:0016021~integral component of membrane,	GO:0004672~protein kinase activity,GO:0004674~protein serine/threonine kinase activity,GO:0005524~ATP binding,GO:0043565~sequence-specific DNA binding,	IPR000719:Protein kinase, catalytic domain,IPR001245:Serine-threonine/tyrosine-protein kinase catalytic domain,IPR008271:Serine/threonine-protein kinase, active site,IPR011009:Protein kinase-like domain,IPR013320:Concanavalin A-like lectin/glucanase, subgroup,IPR017441:Protein kinase, ATP binding site,			SM00220:S_TKc,	Alternative splicing,ATP-binding,Cell membrane,Complete proteome,Glycoprotein,Kinase,Membrane,Nucleotide-binding,Phosphoprotein,Reference proteome,Serine/threonine-protein kinase,Transferase,Transmembrane,Transmembrane helix,
NODE_168664_length_1944_cov_4.642490	NP_001130729	90.351	1.31e-64	211	uncharacterized LOC100191833(LOC100191833)	Zea mays		GO:0010196~nonphotochemical quenching,	GO:0009507~chloroplast,GO:0016021~integral component of membrane,		IPR007572:Uncharacterised protein family Ycf20,				Complete proteome,Membrane,Reference proteome,Transmembrane,Transmembrane helix,
NODE_168664_length_1944_cov_4.642490	NP_199119	81.034	3.45e-57	191	YCF20-like protein (DUF565)(NPQ6)	Arabidopsis thaliana		GO:0010196~nonphotochemical quenching,	GO:0009507~chloroplast,GO:0016021~integral component of membrane,		IPR007572:Uncharacterised protein family Ycf20,				Complete proteome,Membrane,Reference proteome,Transmembrane,Transmembrane helix,
NODE_168898_length_2759_cov_4.802102	NP_001136588	55.789	2.01e-19	90.9	uncharacterized LOC100216711(cl49602_1)	Zea mays		GO:0016036~cellular response to phosphate starvation,			IPR004331:SPX, N-terminal,				Complete proteome,Reference proteome,
NODE_417917_length_2170_cov_4.932719	NP_001136588	51.579	4.43e-22	98.2	uncharacterized LOC100216711(cl49602_1)	Zea mays		GO:0016036~cellular response to phosphate starvation,			IPR004331:SPX, N-terminal,				Complete proteome,Reference proteome,
NODE_168898_length_2759_cov_4.802102	NP_182038	49.438	1.45e-18	87.4	SPX domain protein 3(SPX3)	Arabidopsis thaliana		GO:0016036~cellular response to phosphate starvation,GO:0080040~positive regulation of cellular response to phosphate starvation,	GO:0005634~nucleus,GO:0005783~endoplasmic reticulum,		IPR004331:SPX, N-terminal,				Complete proteome,Reference proteome,
NODE_169317_length_1054_cov_3.478178	NP_194188	64.242	9.22e-37	136	dicarboxylate carrier 2(DIC2)	Arabidopsis thaliana		GO:0006412~translation,GO:0006810~transport,GO:0006839~mitochondrial transport,GO:0055085~transmembrane transport,	GO:0005739~mitochondrion,GO:0005743~mitochondrial inner membrane,GO:0016021~integral component of membrane,	GO:0003735~structural constituent of ribosome,GO:0005310~dicarboxylic acid transmembrane transporter activity,	IPR002067:Mitochondrial carrier protein,IPR018108:Mitochondrial substrate/solute carrier,IPR023395:Mitochondrial carrier domain,				Complete proteome,Membrane,Mitochondrion,Mitochondrion inner membrane,Reference proteome,Repeat,Stress response,Transmembrane,Transmembrane helix,Transport,
NODE_169368_length_1421_cov_4.142857	NP_001310678	47.436	4.11e-14	75.9	uncharacterized LOC8278856(LOC8278856)	Ricinus communis		GO:0006629~lipid metabolic process,		GO:0016787~hydrolase activity,	IPR002921:Lipase, class 3,				Complete proteome,Hydrolase,Reference proteome,
NODE_272073_length_980_cov_4.312245	NP_001310678	42.029	1.6e-09	60.5	uncharacterized LOC8278856(LOC8278856)	Ricinus communis		GO:0006629~lipid metabolic process,		GO:0016787~hydrolase activity,	IPR002921:Lipase, class 3,				Complete proteome,Hydrolase,Reference proteome,
NODE_885009_length_1951_cov_3.743209	NP_001310678	36.765	1.61e-08	58.9	uncharacterized LOC8278856(LOC8278856)	Ricinus communis		GO:0006629~lipid metabolic process,		GO:0016787~hydrolase activity,	IPR002921:Lipase, class 3,				Complete proteome,Hydrolase,Reference proteome,
NODE_169829_length_1065_cov_5.311737	NP_001144738	60	3.28e-07	51.6	uncharacterized LOC100277785(LOC100277785)	Zea mays					IPR007650:Protein of unknown function DUF581,				Complete proteome,Reference proteome,
NODE_170644_length_1334_cov_5.045727	NP_178208	68.889	2.85e-14	76.6	MIF4G domain-containing protein / MA3 domain-containing protein(AT1G80930)	Arabidopsis thaliana		GO:0000398~mRNA splicing, via spliceosome,GO:0006412~translation,	GO:0005634~nucleus,GO:0005829~cytosol,GO:0071006~U2-type catalytic step 1 spliceosome,GO:0071013~catalytic step 2 spliceosome,	GO:0003723~RNA binding,	IPR003890:MIF4G-like, type 3,IPR003891:Initiation factor eIF-4 gamma, MA3,IPR016021:MIF4-like, type 1/2/3,IPR016024:Armadillo-type fold,			SM00543:MIF4G,SM00544:MA3,	Complete proteome,Reference proteome,
NODE_17092_length_3794_cov_5.275435	NP_001146448	79.787	5.8e-45	163	uncharacterized LOC100280033(LOC100280033)	Zea mays	Signal transduction mechanisms,			GO:0004674~protein serine/threonine kinase activity,GO:0005524~ATP binding,	IPR000719:Protein kinase, catalytic domain,IPR008266:Tyrosine-protein kinase, active site,IPR011009:Protein kinase-like domain,IPR022495:Kae1-associated kinase Bud32,			SM00220:S_TKc,	Complete proteome,Reference proteome,
NODE_171376_length_3588_cov_5.039577	NP_001130870	79.545	5.04e-13	74.3	uncharacterized LOC100191974(LOC100191974)	Zea mays		GO:0045040~protein import into mitochondrial outer membrane,	GO:0005742~mitochondrial outer membrane translocase complex,		IPR010547:Plant specific mitochondrial import receptor subunit TOM20,IPR011990:Tetratricopeptide-like helical,				Complete proteome,Reference proteome,
NODE_171886_length_3086_cov_4.499028	NP_200579	81.143	7.9e-80	282	Double Clp-N motif-containing P-loop nucleoside triphosphate hydrolases superfamily protein(AT5G57710)	Arabidopsis thaliana	Posttranslational modification, protein turnover, chaperones,	GO:0006351~transcription, DNA-templated,GO:0006355~regulation of transcription, DNA-templated,GO:0009845~seed germination,GO:0019538~protein metabolic process,GO:0080167~response to karrikin,GO:0090351~seedling development,GO:1902347~response to strigolactone,	GO:0005737~cytoplasm,	GO:0005524~ATP binding,GO:0016787~hydrolase activity,	IPR003959:ATPase, AAA-type, core,IPR004176:Clp, N-terminal,IPR027417:P-loop containing nucleoside triphosphate hydrolase,				Complete proteome,Hydrolase,Reference proteome,Transcription,Transcription regulation,
NODE_439466_length_1161_cov_3.571059	NP_200579	59.352	2.05e-143	434	Double Clp-N motif-containing P-loop nucleoside triphosphate hydrolases superfamily protein(AT5G57710)	Arabidopsis thaliana	Posttranslational modification, protein turnover, chaperones,	GO:0006351~transcription, DNA-templated,GO:0006355~regulation of transcription, DNA-templated,GO:0009845~seed germination,GO:0019538~protein metabolic process,GO:0080167~response to karrikin,GO:0090351~seedling development,GO:1902347~response to strigolactone,	GO:0005737~cytoplasm,	GO:0005524~ATP binding,GO:0016787~hydrolase activity,	IPR003959:ATPase, AAA-type, core,IPR004176:Clp, N-terminal,IPR027417:P-loop containing nucleoside triphosphate hydrolase,				Complete proteome,Hydrolase,Reference proteome,Transcription,Transcription regulation,
NODE_646001_length_1379_cov_4.644670	NP_200579	46.154	1.05e-43	166	Double Clp-N motif-containing P-loop nucleoside triphosphate hydrolases superfamily protein(AT5G57710)	Arabidopsis thaliana	Posttranslational modification, protein turnover, chaperones,	GO:0006351~transcription, DNA-templated,GO:0006355~regulation of transcription, DNA-templated,GO:0009845~seed germination,GO:0019538~protein metabolic process,GO:0080167~response to karrikin,GO:0090351~seedling development,GO:1902347~response to strigolactone,	GO:0005737~cytoplasm,	GO:0005524~ATP binding,GO:0016787~hydrolase activity,	IPR003959:ATPase, AAA-type, core,IPR004176:Clp, N-terminal,IPR027417:P-loop containing nucleoside triphosphate hydrolase,				Complete proteome,Hydrolase,Reference proteome,Transcription,Transcription regulation,
NODE_172226_length_1536_cov_4.935547	NP_001147611	35.294	1.26e-41	156	agmatine coumaroyltransferase(LOC100281220)	Zea mays				GO:0016747~transferase activity, transferring acyl groups other than amino-acyl groups,	IPR003480:Transferase,IPR023213:Chloramphenicol acetyltransferase-like domain,				Transferase,
NODE_275927_length_971_cov_4.394439	NP_001147611	45.455	9.63e-22	96.7	agmatine coumaroyltransferase(LOC100281220)	Zea mays				GO:0016747~transferase activity, transferring acyl groups other than amino-acyl groups,	IPR003480:Transferase,IPR023213:Chloramphenicol acetyltransferase-like domain,				Transferase,
NODE_845121_length_1300_cov_4.459231	NP_001147611	36.308	2.68e-54	188	agmatine coumaroyltransferase(LOC100281220)	Zea mays				GO:0016747~transferase activity, transferring acyl groups other than amino-acyl groups,	IPR003480:Transferase,IPR023213:Chloramphenicol acetyltransferase-like domain,				Transferase,
NODE_928165_length_1100_cov_5.797273	NP_001147611	44.199	6.98e-36	137	agmatine coumaroyltransferase(LOC100281220)	Zea mays				GO:0016747~transferase activity, transferring acyl groups other than amino-acyl groups,	IPR003480:Transferase,IPR023213:Chloramphenicol acetyltransferase-like domain,				Transferase,
NODE_172226_length_1536_cov_4.935547	NP_001169239	33.603	1.9e-31	127	uncharacterized LOC100383097(LOC100383097)	Zea mays				GO:0016747~transferase activity, transferring acyl groups other than amino-acyl groups,	IPR003480:Transferase,IPR023213:Chloramphenicol acetyltransferase-like domain,				Complete proteome,Reference proteome,
NODE_275927_length_971_cov_4.394439	NP_001169239	43.363	2.77e-25	97.4	uncharacterized LOC100383097(LOC100383097)	Zea mays				GO:0016747~transferase activity, transferring acyl groups other than amino-acyl groups,	IPR003480:Transferase,IPR023213:Chloramphenicol acetyltransferase-like domain,				Complete proteome,Reference proteome,
NODE_845121_length_1300_cov_4.459231	NP_001169239	34.259	1.84e-46	167	uncharacterized LOC100383097(LOC100383097)	Zea mays				GO:0016747~transferase activity, transferring acyl groups other than amino-acyl groups,	IPR003480:Transferase,IPR023213:Chloramphenicol acetyltransferase-like domain,				Complete proteome,Reference proteome,
NODE_928165_length_1100_cov_5.797273	NP_001169239	33.75	3.01e-20	93.2	uncharacterized LOC100383097(LOC100383097)	Zea mays				GO:0016747~transferase activity, transferring acyl groups other than amino-acyl groups,	IPR003480:Transferase,IPR023213:Chloramphenicol acetyltransferase-like domain,				Complete proteome,Reference proteome,
NODE_172261_length_1056_cov_4.806818	NP_568839	80	9.94e-11	63.5	COP9 signalosome subunit 6A(CSN6A)	Arabidopsis thaliana		GO:0000338~protein deneddylation,GO:0006511~ubiquitin-dependent protein catabolic process,GO:0007275~multicellular organism development,GO:0009585~red, far-red light phototransduction,GO:0009640~photomorphogenesis,GO:0010387~COP9 signalosome assembly,GO:0010388~cullin deneddylation,GO:0030163~protein catabolic process,	GO:0005634~nucleus,GO:0005737~cytoplasm,GO:0008180~COP9 signalosome,	GO:0005515~protein binding,	IPR000555:JAB1/Mov34/MPN/PAD-1,IPR024969:Rpn11/EIF3F C-terminal domain,			SM00232:JAB_MPN,	Complete proteome,Cytoplasm,Developmental protein,Nucleus,Phytochrome signaling pathway,Reference proteome,Signalosome,	chain:COP9 signalosome complex subunit 6a,domain:MPN,sequence conflict,
NODE_172508_length_1152_cov_4.401910	NP_001142279	63.462	1.87e-17	74.7	putative serine peptidase S28 family protein(LOC100274448)	Zea mays				GO:0008236~serine-type peptidase activity,	IPR008758:Peptidase S28,				Complete proteome,Reference proteome,Signal,
NODE_172743_length_1391_cov_5.282531	NP_054528	89.744	2.76e-16	73.9	photosystem II reaction center N protein(psbN)	Nicotiana tabacum		GO:0015979~photosynthesis,	GO:0009535~chloroplast thylakoid membrane,GO:0009536~plastid,GO:0009539~photosystem II reaction center,GO:0016021~integral component of membrane,GO:0042651~thylakoid membrane,		IPR003398:Photosystem II PsbN,				Chloroplast,Membrane,Plastid,Thylakoid,Transmembrane,Transmembrane helix,	chain:Protein psbN,transmembrane region,
NODE_173100_length_3454_cov_4.416908	NP_181951	46.094	2.29e-24	108	NEP-interacting protein (DUF239)(AT2G44220)	Arabidopsis thaliana			GO:0005739~mitochondrion,		IPR004314:Domain of unknown function DUF239,IPR025521:Domain of unknown function DUF4409,				Complete proteome,Reference proteome,Signal,
NODE_173100_length_3454_cov_4.416908	NP_030959	39.062	1.9e-22	102	carboxyl-terminal peptidase (DUF239)(AT2G44210)	Arabidopsis thaliana			GO:0005576~extracellular region,		IPR004314:Domain of unknown function DUF239,IPR025521:Domain of unknown function DUF4409,				Complete proteome,Reference proteome,Signal,
NODE_173133_length_1025_cov_4.857561	NP_001147661	41.803	3.36e-13	69.3	acetyltransferase, GNAT family protein(LOC100281270)	Zea mays				GO:0016740~transferase activity,					Transferase,
NODE_173430_length_2856_cov_4.431723	NP_001136839	55.09	1.7e-45	169	uncharacterized LOC100216989(LOC100216989)	Zea mays		GO:0008380~RNA splicing,	GO:0005681~spliceosomal complex,		IPR004098:Prp18,IPR014906:Pre-mRNA processing factor 4 (PRP4)-like,	zma03040:Spliceosome,		SM00500:SFM,	Coiled coil,Complete proteome,Reference proteome,
NODE_17354_length_3487_cov_5.137367	NP_001151541	87.5	1.07e-11	62.8	uncharacterized LOC100285175(pco149257)	Zea mays					IPR001680:WD40 repeat,IPR006594:LisH dimerisation motif,IPR015943:WD40/YVTN repeat-like-containing domain,IPR017986:WD40-repeat-containing domain,IPR019775:WD40 repeat, conserved site,			SM00320:WD40,	Coiled coil,Complete proteome,Reference proteome,Repeat,WD repeat,
NODE_487978_length_1461_cov_3.942505	NP_001151541	69.072	2.93e-37	93.6	uncharacterized LOC100285175(pco149257)	Zea mays					IPR001680:WD40 repeat,IPR006594:LisH dimerisation motif,IPR015943:WD40/YVTN repeat-like-containing domain,IPR017986:WD40-repeat-containing domain,IPR019775:WD40 repeat, conserved site,			SM00320:WD40,	Coiled coil,Complete proteome,Reference proteome,Repeat,WD repeat,
NODE_487978_length_1461_cov_3.942505	NP_001151541	87.805	2.93e-37	82.4	uncharacterized LOC100285175(pco149257)	Zea mays					IPR001680:WD40 repeat,IPR006594:LisH dimerisation motif,IPR015943:WD40/YVTN repeat-like-containing domain,IPR017986:WD40-repeat-containing domain,IPR019775:WD40 repeat, conserved site,			SM00320:WD40,	Coiled coil,Complete proteome,Reference proteome,Repeat,WD repeat,
NODE_503309_length_1374_cov_5.427220	NP_001151541	52.212	4.34e-29	122	uncharacterized LOC100285175(pco149257)	Zea mays					IPR001680:WD40 repeat,IPR006594:LisH dimerisation motif,IPR015943:WD40/YVTN repeat-like-containing domain,IPR017986:WD40-repeat-containing domain,IPR019775:WD40 repeat, conserved site,			SM00320:WD40,	Coiled coil,Complete proteome,Reference proteome,Repeat,WD repeat,
NODE_628350_length_2536_cov_4.550473	NP_001151541	72.464	6.39e-25	112	uncharacterized LOC100285175(pco149257)	Zea mays					IPR001680:WD40 repeat,IPR006594:LisH dimerisation motif,IPR015943:WD40/YVTN repeat-like-containing domain,IPR017986:WD40-repeat-containing domain,IPR019775:WD40 repeat, conserved site,			SM00320:WD40,	Coiled coil,Complete proteome,Reference proteome,Repeat,WD repeat,
NODE_174091_length_3655_cov_4.931874	NP_001131308	82.609	1.05e-16	85.9	uncharacterized LOC100192621(LOC100192621)	Zea mays					IPR018800:Mitotic checkpoint protein PRCC, C-terminal,				Complete proteome,Reference proteome,
NODE_174539_length_2854_cov_4.830063	NP_001236040	88.235	1.14e-45	162	uncharacterized LOC100500043(LOC100500043)	Glycine max		GO:0000027~ribosomal large subunit assembly,GO:0006412~translation,	GO:0022625~cytosolic large ribosomal subunit,	GO:0000166~nucleotide binding,GO:0003735~structural constituent of ribosome,	IPR001014:Ribosomal protein L23/L25, conserved site,IPR005633:Ribosomal protein L23/L25, N-terminal,IPR012677:Nucleotide-binding, alpha-beta plait,IPR012678:Ribosomal protein L23/L15e core domain,IPR013025:Ribosomal protein L25/L23,IPR019985:Ribosomal protein L23,	gmx03010:Ribosome,			Complete proteome,Reference proteome,Ribonucleoprotein,Ribosomal protein,
NODE_174539_length_2854_cov_4.830063	NP_001236899	83.333	6.49e-44	157	uncharacterized LOC100527754(LOC100527754)	Glycine max		GO:0000027~ribosomal large subunit assembly,GO:0006412~translation,	GO:0022625~cytosolic large ribosomal subunit,	GO:0000166~nucleotide binding,GO:0003735~structural constituent of ribosome,	IPR001014:Ribosomal protein L23/L25, conserved site,IPR005633:Ribosomal protein L23/L25, N-terminal,IPR012677:Nucleotide-binding, alpha-beta plait,IPR012678:Ribosomal protein L23/L15e core domain,IPR013025:Ribosomal protein L25/L23,IPR019985:Ribosomal protein L23,	gmx03010:Ribosome,			Complete proteome,Reference proteome,Ribonucleoprotein,Ribosomal protein,
NODE_174849_length_3234_cov_5.253865	NP_001291229	71.308	6.09e-112	350	probable xyloglucan endotransglucosylase/hydrolase protein B(XET)	Populus euphratica		GO:0010411~xyloglucan metabolic process,GO:0042546~cell wall biogenesis,GO:0071555~cell wall organization,	GO:0005618~cell wall,GO:0048046~apoplast,	GO:0004553~hydrolase activity, hydrolyzing O-glycosyl compounds,GO:0016762~xyloglucan:xyloglucosyl transferase activity,	IPR000757:Glycoside hydrolase, family 16,IPR008263:Glycoside hydrolase, family 16, active site,IPR010713:Xyloglucan endo-transglycosylase, C-terminal,IPR013320:Concanavalin A-like lectin/glucanase, subgroup,IPR016455:Xyloglucan endotransglucosylase/hydrolase,		PIRSF005604:xyloglucan endotransglucosylase/hydrolase,		Apoplast,Cell wall,Cell wall biogenesis/degradation,Glycosidase,Hydrolase,Secreted,Signal,Transferase,
NODE_174849_length_3234_cov_5.253865	NP_001315789	70.042	1.99e-109	343	xyloglucan endotransglucosylase/hydrolase protein A-like(LOC103423907)	Malus domestica		GO:0010411~xyloglucan metabolic process,GO:0042546~cell wall biogenesis,GO:0071555~cell wall organization,	GO:0005618~cell wall,GO:0048046~apoplast,	GO:0004553~hydrolase activity, hydrolyzing O-glycosyl compounds,GO:0016762~xyloglucan:xyloglucosyl transferase activity,	IPR000757:Glycoside hydrolase, family 16,IPR008263:Glycoside hydrolase, family 16, active site,IPR010713:Xyloglucan endo-transglycosylase, C-terminal,IPR013320:Concanavalin A-like lectin/glucanase, subgroup,IPR016455:Xyloglucan endotransglucosylase/hydrolase,		PIRSF005604:xyloglucan endotransglucosylase/hydrolase,		Apoplast,Cell wall,Cell wall biogenesis/degradation,Glycosidase,Hydrolase,Secreted,Signal,Transferase,
NODE_174849_length_3234_cov_5.253865	NP_001289208	68.354	3.75e-107	338	probable xyloglucan endotransglucosylase/hydrolase protein B(XET1)	Pyrus x bretschneideri		GO:0010411~xyloglucan metabolic process,GO:0042546~cell wall biogenesis,GO:0071555~cell wall organization,	GO:0005618~cell wall,GO:0048046~apoplast,	GO:0004553~hydrolase activity, hydrolyzing O-glycosyl compounds,GO:0016762~xyloglucan:xyloglucosyl transferase activity,	IPR000757:Glycoside hydrolase, family 16,IPR008263:Glycoside hydrolase, family 16, active site,IPR010713:Xyloglucan endo-transglycosylase, C-terminal,IPR013320:Concanavalin A-like lectin/glucanase, subgroup,IPR016455:Xyloglucan endotransglucosylase/hydrolase,		PIRSF005604:xyloglucan endotransglucosylase/hydrolase,		Apoplast,Cell wall,Cell wall biogenesis/degradation,Glycosidase,Hydrolase,Secreted,Signal,Transferase,
NODE_175507_length_2434_cov_4.792933	NP_001151800	58.416	4.33e-28	115	DNA-3-methyladenine glycosylase(LOC100285435)	Zea mays		GO:0006284~base-excision repair,		GO:0003677~DNA binding,GO:0003905~alkylbase DNA N-glycosylase activity,	IPR003180:Methylpurine-DNA glycosylase (MPG),IPR011034:Formyl transferase, C-terminal-like,	zma03410:Base excision repair,
NODE_176413_length_1357_cov_3.898305	NP_001234249	36.792	1.49e-38	146	xyloglucan-specific fungal endoglucanase inhibitor protein precursor(Xegip)	Solanum lycopersicum		GO:0006508~proteolysis,GO:0030163~protein catabolic process,		GO:0004190~aspartic-type endopeptidase activity,	IPR001461:Peptidase A1,IPR021109:Aspartic peptidase,				Complete proteome,Reference proteome,Signal,
NODE_176413_length_1357_cov_3.898305	NP_563679	34.062	6.16e-38	144	Eukaryotic aspartyl protease family protein(AT1G03230)	Arabidopsis thaliana		GO:0006508~proteolysis,GO:0009651~response to salt stress,GO:0030163~protein catabolic process,	GO:0005576~extracellular region,GO:0005618~cell wall,GO:0005794~Golgi apparatus,GO:0005886~plasma membrane,GO:0009505~plant-type cell wall,	GO:0004190~aspartic-type endopeptidase activity,	IPR001461:Peptidase A1,IPR021109:Aspartic peptidase,				Complete proteome,Hydrolase,Protease,Reference proteome,Signal,
NODE_176426_length_2711_cov_4.600516	NP_001236950	54.808	7.09e-28	113	bZIP transcription factor bZIP35(BZIP35)	Glycine max				GO:0003700~transcription factor activity, sequence-specific DNA binding,GO:0043565~sequence-specific DNA binding,	IPR004827:Basic-leucine zipper domain,			SM00338:BRLZ,	Coiled coil,Complete proteome,Reference proteome,
NODE_177302_length_1335_cov_5.059925	NP_001304490	50.725	2.73e-32	127	zinc finger protein WIP2-like(LOC100801922)	Glycine max				GO:0003676~nucleic acid binding,GO:0046872~metal ion binding,	IPR007087:Zinc finger, C2H2,IPR013087:Zinc finger C2H2-type/integrase DNA-binding domain,				Complete proteome,Reference proteome,
NODE_25215_length_1280_cov_4.662500	NP_001304490	48.889	1.47e-18	87.8	zinc finger protein WIP2-like(LOC100801922)	Glycine max				GO:0003676~nucleic acid binding,GO:0046872~metal ion binding,	IPR007087:Zinc finger, C2H2,IPR013087:Zinc finger C2H2-type/integrase DNA-binding domain,				Complete proteome,Reference proteome,
NODE_177420_length_953_cov_5.082896	NP_001031070	54.762	1.73e-10	63.5	Subtilisin-like serine endopeptidase family protein(ATSBT5.2)	Arabidopsis thaliana	Posttranslational modification, protein turnover, chaperones,	GO:0006508~proteolysis,GO:0008152~metabolic process,GO:0010037~response to carbon dioxide,GO:2000038~regulation of stomatal complex development,GO:2000122~negative regulation of stomatal complex development,	GO:0005576~extracellular region,GO:0005618~cell wall,GO:0048046~apoplast,	GO:0004252~serine-type endopeptidase activity,GO:0008236~serine-type peptidase activity,	IPR000209:Peptidase S8/S53 domain,IPR010259:Proteinase inhibitor I9,IPR015500:Peptidase S8, subtilisin-related,IPR022398:Peptidase S8, subtilisin, His-active site,IPR023828:Peptidase S8, subtilisin, Ser-active site,				Alternative splicing,Cell wall,Complete proteome,Hydrolase,Protease,Reference proteome,Secreted,Serine protease,Signal,
NODE_177718_length_1468_cov_4.880109	NP_001312738	59.211	1.39e-24	108	hexokinase-1-like(LOC107807808)	Nicotiana tabacum		GO:0001678~cellular glucose homeostasis,GO:0006096~glycolytic process,	GO:0005623~cell,	GO:0004396~hexokinase activity,GO:0005524~ATP binding,GO:0005536~glucose binding,	IPR001312:Hexokinase,IPR019807:Hexokinase, conserved site,IPR022672:Hexokinase, N-terminal,IPR022673:Hexokinase, C-terminal,				ATP-binding,Glycolysis,Kinase,Nucleotide-binding,Transferase,
NODE_842653_length_2229_cov_5.135935	NP_001312738	44.898	1.68e-15	81.3	hexokinase-1-like(LOC107807808)	Nicotiana tabacum		GO:0001678~cellular glucose homeostasis,GO:0006096~glycolytic process,	GO:0005623~cell,	GO:0004396~hexokinase activity,GO:0005524~ATP binding,GO:0005536~glucose binding,	IPR001312:Hexokinase,IPR019807:Hexokinase, conserved site,IPR022672:Hexokinase, N-terminal,IPR022673:Hexokinase, C-terminal,				ATP-binding,Glycolysis,Kinase,Nucleotide-binding,Transferase,
NODE_177930_length_3040_cov_5.530263	NP_001304208	59.42	4.46e-45	175	ATP-dependent DNA helicase 2 subunit KU80(LOC106752830)	Vigna radiata		GO:0000723~telomere maintenance,GO:0006303~double-strand break repair via nonhomologous end joining,GO:0006310~DNA recombination,	GO:0043564~Ku70:Ku80 complex,	GO:0003684~damaged DNA binding,GO:0004003~ATP-dependent DNA helicase activity,GO:0005524~ATP binding,GO:0042162~telomeric DNA binding,	IPR002035:von Willebrand factor, type A,IPR005160:Ku70/Ku80 C-terminal arm,IPR005161:Ku70/Ku80, N-terminal alpha/beta,IPR006164:Ku70/Ku80 beta-barrel domain,IPR014893:Ku, C-terminal,IPR016194:SPOC like C-terminal domain,IPR024193:Ku80,		PIRSF016570:Ku DNA-binding complex, Ku80 subunit [Parent=PIRSF800001],	SM00559:Ku78,	ATP-binding,DNA damage,DNA recombination,DNA repair,DNA-binding,Helicase,Hydrolase,Nucleotide-binding,Nucleus,
NODE_178117_length_1149_cov_4.417755	NP_201248	50	1.41e-45	165	Octicosapeptide/Phox/Bem1p family protein(AT5G64430)	Arabidopsis thaliana			GO:0005634~nucleus,GO:0009941~chloroplast envelope,		IPR000270:Phox/Bem1p,			SM00666:PB1,	Complete proteome,Reference proteome,
NODE_178534_length_2289_cov_4.483617	NP_001143808	39.326	1.16e-09	60.5	uncharacterized LOC100276582(LOC100276582)	Zea mays					IPR007608:Senescence regulator,				Complete proteome,Reference proteome,
NODE_179712_length_4170_cov_5.323501	NP_001184910	76.744	8.11e-13	74.7	HIT-type Zinc finger family protein(AT1G04945)	Arabidopsis thaliana			GO:0005634~nucleus,GO:0009507~chloroplast,GO:0016021~integral component of membrane,		IPR005691:Chloroplast protein import component Tic20,IPR007529:Zinc finger, HIT-type,				Complete proteome,Membrane,Reference proteome,Transmembrane,Transmembrane helix,
NODE_179712_length_4170_cov_5.323501	NP_001239920	69.565	1.21e-12	71.2	uncharacterized LOC100791350(LOC100791350)	Glycine max			GO:0016021~integral component of membrane,		IPR005691:Chloroplast protein import component Tic20,				Complete proteome,Membrane,Reference proteome,Transmembrane,Transmembrane helix,
NODE_179794_length_1905_cov_4.525459	NP_001314170	39.767	7.26e-49	181	transcription factor ICE1-like(LOC107924641)	Gossypium hirsutum					IPR011598:Myc-type, basic helix-loop-helix (bHLH) domain,			SM00353:HLH,	Coiled coil,
NODE_179794_length_1905_cov_4.525459	NP_001306859	39.808	1.44e-41	160	transcription factor ICE1-like(LOC105648729)	Jatropha curcas					IPR011598:Myc-type, basic helix-loop-helix (bHLH) domain,			SM00353:HLH,	Coiled coil,
NODE_180149_length_2010_cov_5.237313	NP_001241109	81.395	5.53e-17	84.3	minor histocompatibility antigen H13-like(LOC100807073)	Glycine max		GO:0006465~signal peptide processing,GO:0033619~membrane protein proteolysis,	GO:0005765~lysosomal membrane,GO:0030660~Golgi-associated vesicle membrane,GO:0071458~integral component of cytoplasmic side of endoplasmic reticulum membrane,GO:0071556~integral component of lumenal side of endoplasmic reticulum membrane,	GO:0042500~aspartic endopeptidase activity, intramembrane cleaving,	IPR006639:Peptidase A22, presenilin signal peptide,IPR007369:Peptidase A22B, signal peptide peptidase,			SM00730:PSN,	Complete proteome,Membrane,Reference proteome,Transmembrane,Transmembrane helix,
NODE_180309_length_2257_cov_4.330084	NP_180009	59.804	2.24e-33	131	alpha/beta-Hydrolases superfamily protein(AT2G24320)	Arabidopsis thaliana			GO:0005576~extracellular region,	GO:0016787~hydrolase activity,					Complete proteome,Hydrolase,Reference proteome,
NODE_180808_length_3727_cov_4.823719	NP_001329800	65.323	1.61e-46	173	glycosyl hydrolase 9B18(GH9B18)	Arabidopsis thaliana		GO:0030245~cellulose catabolic process,GO:0071555~cell wall organization,	GO:0005576~extracellular region,	GO:0004553~hydrolase activity, hydrolyzing O-glycosyl compounds,GO:0008810~cellulase activity,	IPR001701:Glycoside hydrolase, family 9,IPR008928:Six-hairpin glycosidase-like,IPR012341:Six-hairpin glycosidase,IPR018221:Glycoside hydrolase, family 9, active site,	ath00500:Starch and sucrose metabolism,ath01100:Metabolic pathways,			Carbohydrate metabolism,Cell wall biogenesis/degradation,Cellulose degradation,Complete proteome,Glycoprotein,Glycosidase,Hydrolase,Polysaccharide degradation,Reference proteome,Secreted,Signal,	chain:Endoglucanase 24,glycosylation site:N-linked (GlcNAc...),signal peptide,
NODE_18087_length_4247_cov_4.640687	NP_001237600	44.828	1.05e-92	305	RAV-like DNA-binding protein(LOC732601)	Glycine max		GO:0006351~transcription, DNA-templated,	GO:0005634~nucleus,	GO:0003677~DNA binding,GO:0003700~transcription factor activity, sequence-specific DNA binding,	IPR001471:AP2/ERF domain,IPR003340:B3 DNA binding domain,IPR015300:DNA-binding pseudobarrel domain,IPR016177:DNA-binding, integrase-type,			SM00380:AP2,SM01019:SM01019,	Complete proteome,DNA-binding,Nucleus,Reference proteome,Transcription,Transcription regulation,
NODE_180913_length_1689_cov_4.933096	NP_567258	74.419	5.39e-13	73.2	two-pore channel 1(TPC1)	Arabidopsis thaliana		GO:0006816~calcium ion transport,GO:0009845~seed germination,GO:0010119~regulation of stomatal movement,GO:0019722~calcium-mediated signaling,GO:0034765~regulation of ion transmembrane transport,GO:0070588~calcium ion transmembrane transport,GO:0080141~regulation of jasmonic acid biosynthetic process,GO:0086010~membrane depolarization during action potential,	GO:0000325~plant-type vacuole,GO:0005773~vacuole,GO:0005774~vacuolar membrane,GO:0005794~Golgi apparatus,GO:0005886~plasma membrane,GO:0016021~integral component of membrane,	GO:0005216~ion channel activity,GO:0005245~voltage-gated calcium channel activity,GO:0005262~calcium channel activity,GO:0005509~calcium ion binding,	IPR002048:EF-hand domain,IPR005821:Ion transport domain,IPR011992:EF-hand-like domain,IPR027359:Voltage-dependent potassium channel, four helix bundle domain,			SM00054:EFh,	3D-structure,Acetylation,Calcium,Calcium channel,Calcium transport,Complete proteome,Ion channel,Ion transport,Membrane,Reference proteome,Repeat,Transmembrane,Transmembrane helix,Transport,Vacuole,Voltage-gated channel,	chain:Two pore calcium channel protein 1,domain:EF-hand 1,domain:EF-hand 2,mutagenesis site,region of interest:Pore-forming 1, in membrane,region of interest:Pore-forming 2, in membrane,sequence conflict,topological domain:Cytoplasmic,topological domain:Vacuolar,transmembrane region,
NODE_181352_length_2938_cov_4.849217	NP_001306880	89.13	4.28e-21	92	ubiquitin-conjugating enzyme E2 variant 1D(SlUev1D)	Solanum lycopersicum		GO:0006301~postreplication repair,GO:0070534~protein K63-linked ubiquitination,	GO:0005634~nucleus,GO:0005737~cytoplasm,	GO:0031625~ubiquitin protein ligase binding,GO:0061630~ubiquitin protein ligase activity,	IPR000608:Ubiquitin-conjugating enzyme, E2,IPR016135:Ubiquitin-conjugating enzyme/RWD-like,				Complete proteome,Reference proteome,
NODE_181563_length_1750_cov_5.561714	NP_171789	64	6.97e-24	98.2	rapid alkalinization factor 1(RALF1)	Arabidopsis thaliana		GO:0007267~cell-cell signaling,GO:0019722~calcium-mediated signaling,GO:0030308~negative regulation of cell growth,GO:0048364~root development,	GO:0005576~extracellular region,GO:0005622~intracellular,GO:0009506~plasmodesma,GO:0048046~apoplast,	GO:0004871~signal transducer activity,GO:0005179~hormone activity,GO:0005515~protein binding,	IPR008801:Rapid ALkalinization Factor,				Complete proteome,Direct protein sequencing,Disulfide bond,Glycoprotein,Hormone,Reference proteome,Secreted,Signal,
NODE_864137_length_948_cov_4.318565	NP_171789	42.105	1.27e-14	70.5	rapid alkalinization factor 1(RALF1)	Arabidopsis thaliana		GO:0007267~cell-cell signaling,GO:0019722~calcium-mediated signaling,GO:0030308~negative regulation of cell growth,GO:0048364~root development,	GO:0005576~extracellular region,GO:0005622~intracellular,GO:0009506~plasmodesma,GO:0048046~apoplast,	GO:0004871~signal transducer activity,GO:0005179~hormone activity,GO:0005515~protein binding,	IPR008801:Rapid ALkalinization Factor,				Complete proteome,Direct protein sequencing,Disulfide bond,Glycoprotein,Hormone,Reference proteome,Secreted,Signal,
NODE_181755_length_1691_cov_4.380249	NP_179660	64.286	4.56e-34	135	Glycosyl hydrolase superfamily protein(MAN2)	Arabidopsis thaliana		GO:0010412~mannan metabolic process,GO:0046355~mannan catabolic process,	GO:0005576~extracellular region,	GO:0004553~hydrolase activity, hydrolyzing O-glycosyl compounds,GO:0016985~mannan endo-1,4-beta-mannosidase activity,	IPR001547:Glycoside hydrolase, family 5,IPR013781:Glycoside hydrolase, catalytic domain,IPR017853:Glycoside hydrolase, superfamily,	ath00051:Fructose and mannose metabolism,			Complete proteome,Glycoprotein,Glycosidase,Hydrolase,Reference proteome,Secreted,Signal,	active site:Nucleophile,active site:Proton donor,chain:Mannan endo-1,4-beta-mannosidase 2,glycosylation site:N-linked (GlcNAc...),signal peptide,
NODE_182065_length_1473_cov_4.819416	NP_568428	65.116	6.26e-26	111	pyrimidine d(PYRD)	Arabidopsis thaliana	Nucleotide transport and metabolism,	GO:0006207~'de novo' pyrimidine nucleobase biosynthetic process,GO:0009220~pyrimidine ribonucleotide biosynthetic process,GO:0044205~'de novo' UMP biosynthetic process,GO:0055114~oxidation-reduction process,	GO:0005739~mitochondrion,GO:0005743~mitochondrial inner membrane,GO:0016021~integral component of membrane,	GO:0004152~dihydroorotate dehydrogenase activity,	IPR001295:Dihydroorotate dehydrogenase, conserved site,IPR005719:Dihydroorotate dehydrogenase, class 2,IPR005720:Dihydroorotate dehydrogenase domain,IPR013785:Aldolase-type TIM barrel,	ath00240:Pyrimidine metabolism,ath01100:Metabolic pathways,			Complete proteome,Flavoprotein,FMN,Membrane,Mitochondrion,Mitochondrion inner membrane,Oxidoreductase,Pyrimidine biosynthesis,Reference proteome,Transit peptide,Transmembrane,Transmembrane helix,	active site:Nucleophile,chain:Dihydroorotate dehydrogenase, mitochondrial,transit peptide:Mitochondrion,transmembrane region,
NODE_182065_length_1473_cov_4.819416	NP_001152058	63.953	2.99e-24	106	dihydroorotate dehydrogenase(LOC100285695)	Zea mays	Nucleotide transport and metabolism,	GO:0006207~'de novo' pyrimidine nucleobase biosynthetic process,GO:0044205~'de novo' UMP biosynthetic process,	GO:0005743~mitochondrial inner membrane,	GO:0004152~dihydroorotate dehydrogenase activity,	IPR001295:Dihydroorotate dehydrogenase, conserved site,IPR005719:Dihydroorotate dehydrogenase, class 2,IPR005720:Dihydroorotate dehydrogenase domain,IPR013785:Aldolase-type TIM barrel,	zma00240:Pyrimidine metabolism,zma01100:Metabolic pathways,			Complete proteome,Flavoprotein,FMN,Membrane,Mitochondrion,Mitochondrion inner membrane,Oxidoreductase,Reference proteome,
NODE_182065_length_1473_cov_4.819416	NP_001152058	92.308	2.52e-15	79.7	dihydroorotate dehydrogenase(LOC100285695)	Zea mays	Nucleotide transport and metabolism,	GO:0006207~'de novo' pyrimidine nucleobase biosynthetic process,GO:0044205~'de novo' UMP biosynthetic process,	GO:0005743~mitochondrial inner membrane,	GO:0004152~dihydroorotate dehydrogenase activity,	IPR001295:Dihydroorotate dehydrogenase, conserved site,IPR005719:Dihydroorotate dehydrogenase, class 2,IPR005720:Dihydroorotate dehydrogenase domain,IPR013785:Aldolase-type TIM barrel,	zma00240:Pyrimidine metabolism,zma01100:Metabolic pathways,			Complete proteome,Flavoprotein,FMN,Membrane,Mitochondrion,Mitochondrion inner membrane,Oxidoreductase,Reference proteome,
NODE_182066_length_2462_cov_4.361495	NP_001242000	70.115	2.14e-18	88.6	inactive rhomboid protein 1-like(LOC100784671)	Glycine max			GO:0016021~integral component of membrane,	GO:0004252~serine-type endopeptidase activity,	IPR002610:Peptidase S54, rhomboid,IPR022764:Peptidase S54, rhomboid domain,				Hydrolase,Membrane,Protease,Transmembrane,Transmembrane helix,
NODE_184572_length_1787_cov_4.440962	NP_001238151	60	5.83e-20	95.1	precursor monofunctional aspartokinase(LOC547546)	Glycine max		GO:0008652~cellular amino acid biosynthetic process,GO:0009089~lysine biosynthetic process via diaminopimelate,	GO:0009570~chloroplast stroma,	GO:0004072~aspartate kinase activity,GO:0016597~amino acid binding,	IPR001048:Aspartate/glutamate/uridylate kinase,IPR001341:Aspartate kinase domain,IPR002912:ACT domain,IPR018042:Aspartate kinase, conserved site,	gmx00260:Glycine, serine and threonine metabolism,gmx00261:Monobactam biosynthesis,gmx00270:Cysteine and methionine metabolism,gmx00300:Lysine biosynthesis,gmx01100:Metabolic pathways,gmx01110:Biosynthesis of secondary metabolites,gmx01130:Biosynthesis of antibiotics,gmx01210:2-Oxocarboxylic acid metabolism,gmx01230:Biosynthesis of amino acids,			Amino-acid biosynthesis,Complete proteome,Kinase,Reference proteome,Transferase,
NODE_184572_length_1787_cov_4.440962	NP_001306630	57.778	1.95e-19	93.6	monofunctional aspartate kinase 2(LOC100136881)	Zea mays		GO:0008652~cellular amino acid biosynthetic process,		GO:0004072~aspartate kinase activity,GO:0016597~amino acid binding,	IPR001048:Aspartate/glutamate/uridylate kinase,IPR001341:Aspartate kinase domain,IPR002912:ACT domain,IPR018042:Aspartate kinase, conserved site,	zma00260:Glycine, serine and threonine metabolism,zma00261:Monobactam biosynthesis,zma00270:Cysteine and methionine metabolism,zma00300:Lysine biosynthesis,zma01100:Metabolic pathways,zma01110:Biosynthesis of secondary metabolites,zma01130:Biosynthesis of antibiotics,zma01210:2-Oxocarboxylic acid metabolism,zma01230:Biosynthesis of amino acids,			Amino-acid biosynthesis,Complete proteome,Reference proteome,
NODE_184611_length_1770_cov_5.641243	NP_001168320	51.261	4.54e-23	102	uncharacterized LOC100382086(LOC100382086)	Zea mays					IPR005069:Nucleotide-diphospho-sugar transferase,				Complete proteome,Reference proteome,
NODE_184611_length_1770_cov_5.641243	NP_567479	41.732	1.83e-21	97.8	Nucleotide-diphospho-sugar transferase family protein(AT4G15970)	Arabidopsis thaliana			GO:0005739~mitochondrion,		IPR005069:Nucleotide-diphospho-sugar transferase,				Complete proteome,Reference proteome,	chain:Uncharacterized protein At4g15970,
NODE_292493_length_1640_cov_4.776829	NP_567479	45.283	1.03e-08	58.5	Nucleotide-diphospho-sugar transferase family protein(AT4G15970)	Arabidopsis thaliana			GO:0005739~mitochondrion,		IPR005069:Nucleotide-diphospho-sugar transferase,				Complete proteome,Reference proteome,	chain:Uncharacterized protein At4g15970,
NODE_184987_length_1258_cov_4.705883	NP_001305539	46.087	1.87e-22	97.8	SNF1-related protein kinase regulatory subunit beta-1-like(LOC102591352)	Solanum tuberosum		GO:0009744~response to sucrose,GO:0043562~cellular response to nitrogen levels,			IPR006828:5-AMP-activated protein kinase, beta subunit, interaction domain,IPR014756:Immunoglobulin E-set,	sot04931:Insulin resistance,		SM01010:SM01010,
NODE_185350_length_1232_cov_4.580357	NP_001142028	51.961	1.44e-27	115	uncharacterized LOC100274182(si707056b03)	Zea mays		GO:0005975~carbohydrate metabolic process,		GO:0004553~hydrolase activity, hydrolyzing O-glycosyl compounds,	IPR001701:Glycoside hydrolase, family 9,IPR008928:Six-hairpin glycosidase-like,IPR012341:Six-hairpin glycosidase,				Complete proteome,Reference proteome,Signal,
NODE_185485_length_2767_cov_4.016263	NP_001307189	50.382	5.13e-33	137	L-type lectin-domain containing receptor kinase IV.1-like(LecRK-IV)	Solanum lycopersicum			GO:0016021~integral component of membrane,	GO:0004672~protein kinase activity,GO:0005524~ATP binding,GO:0030246~carbohydrate binding,	IPR000719:Protein kinase, catalytic domain,IPR001220:Legume lectin domain,IPR008271:Serine/threonine-protein kinase, active site,IPR011009:Protein kinase-like domain,IPR013320:Concanavalin A-like lectin/glucanase, subgroup,IPR017441:Protein kinase, ATP binding site,IPR019825:Legume lectin, beta chain, Mn/Ca-binding site,			SM00220:S_TKc,	Complete proteome,Kinase,Lectin,Membrane,Receptor,Reference proteome,Signal,Transferase,Transmembrane,Transmembrane helix,
NODE_185485_length_2767_cov_4.016263	NP_001313710	61.538	7.29e-30	127	L-type lectin-domain containing receptor kinase IV.1-like(LOC107891071)	Gossypium hirsutum			GO:0016021~integral component of membrane,	GO:0004672~protein kinase activity,GO:0005524~ATP binding,GO:0030246~carbohydrate binding,	IPR000719:Protein kinase, catalytic domain,IPR001220:Legume lectin domain,IPR011009:Protein kinase-like domain,IPR013320:Concanavalin A-like lectin/glucanase, subgroup,IPR017441:Protein kinase, ATP binding site,IPR019825:Legume lectin, beta chain, Mn/Ca-binding site,				Kinase,Lectin,Membrane,Receptor,Signal,Transferase,Transmembrane,Transmembrane helix,
NODE_380900_length_1682_cov_4.492866	NP_001313710	62.222	3.69e-09	60.8	L-type lectin-domain containing receptor kinase IV.1-like(LOC107891071)	Gossypium hirsutum			GO:0016021~integral component of membrane,	GO:0004672~protein kinase activity,GO:0005524~ATP binding,GO:0030246~carbohydrate binding,	IPR000719:Protein kinase, catalytic domain,IPR001220:Legume lectin domain,IPR011009:Protein kinase-like domain,IPR013320:Concanavalin A-like lectin/glucanase, subgroup,IPR017441:Protein kinase, ATP binding site,IPR019825:Legume lectin, beta chain, Mn/Ca-binding site,				Kinase,Lectin,Membrane,Receptor,Signal,Transferase,Transmembrane,Transmembrane helix,
NODE_185485_length_2767_cov_4.016263	NP_177170	58	2.7e-29	126	Concanavalin A-like lectin protein kinase family protein(AT1G70130)	Arabidopsis thaliana		GO:0006468~protein phosphorylation,	GO:0005886~plasma membrane,GO:0016021~integral component of membrane,	GO:0004674~protein serine/threonine kinase activity,GO:0005524~ATP binding,GO:0016301~kinase activity,GO:0030246~carbohydrate binding,	IPR000719:Protein kinase, catalytic domain,IPR001220:Legume lectin domain,IPR008271:Serine/threonine-protein kinase, active site,IPR011009:Protein kinase-like domain,IPR013320:Concanavalin A-like lectin/glucanase, subgroup,IPR017441:Protein kinase, ATP binding site,			SM00220:S_TKc,	ATP-binding,Cell membrane,Complete proteome,Glycoprotein,Kinase,Lectin,Membrane,Nucleotide-binding,Receptor,Reference proteome,Serine/threonine-protein kinase,Signal,Transferase,Transmembrane,Transmembrane helix,
NODE_185798_length_2069_cov_5.070566	NP_001132909	65.333	2.47e-26	113	phosphatidate cytidylyltransferase(LOC100194409)	Zea mays		GO:0016024~CDP-diacylglycerol biosynthetic process,	GO:0016021~integral component of membrane,	GO:0004605~phosphatidate cytidylyltransferase activity,	IPR000374:Phosphatidate cytidylyltransferase,IPR016720:Phosphatidate cytidylyltransferase, eukaryota,	zma00564:Glycerophospholipid metabolism,zma01100:Metabolic pathways,zma01110:Biosynthesis of secondary metabolites,zma04070:Phosphatidylinositol signaling system,	PIRSF018269:phosphatidate cytidylyltransferase, eukaryotic type,		Complete proteome,Membrane,Nucleotidyltransferase,Reference proteome,Transferase,Transmembrane,Transmembrane helix,
NODE_187564_length_1502_cov_4.847537	NP_173240	58.879	4.25e-28	120	poly(A) polymerase 1(PAPS1)	Arabidopsis thaliana		GO:0006378~mRNA polyadenylation,GO:0008285~negative regulation of cell proliferation,GO:0009908~flower development,GO:0031123~RNA 3'-end processing,GO:0043631~RNA polyadenylation,GO:0045824~negative regulation of innate immune response,GO:0048366~leaf development,GO:0048451~petal formation,	GO:0005634~nucleus,	GO:0003723~RNA binding,GO:0004652~polynucleotide adenylyltransferase activity,GO:0005515~protein binding,GO:0005524~ATP binding,GO:0016779~nucleotidyltransferase activity,GO:0046872~metal ion binding,	IPR002934:Nucleotidyl transferase domain,IPR007010:Poly(A) polymerase, RNA-binding domain,IPR007012:Poly(A) polymerase, central domain,IPR011068:Nucleotidyltransferase, class I, C-terminal-like,IPR014492:Poly(A) polymerase,	ath03015:mRNA surveillance pathway,	PIRSF018425:poly(A) polymerase,		Alternative splicing,ATP-binding,Complete proteome,Magnesium,Metal-binding,mRNA processing,Nucleotide-binding,Nucleotidyltransferase,Nucleus,Reference proteome,Transferase,
NODE_187564_length_1502_cov_4.847537	NP_001307639	55.66	1.13e-24	109	uncharacterized LOC100280371(LOC100280371)	Zea mays		GO:0031123~RNA 3'-end processing,GO:0043631~RNA polyadenylation,	GO:0005634~nucleus,	GO:0003723~RNA binding,GO:0004652~polynucleotide adenylyltransferase activity,	IPR002934:Nucleotidyl transferase domain,IPR007010:Poly(A) polymerase, RNA-binding domain,IPR007012:Poly(A) polymerase, central domain,IPR011068:Nucleotidyltransferase, class I, C-terminal-like,IPR014492:Poly(A) polymerase,		PIRSF018425:poly(A) polymerase,		Complete proteome,Reference proteome,
NODE_187671_length_1903_cov_5.007357	NP_564058	80	2.54e-08	57.8	RHOMBOID-like protein 12(RBL12)	Arabidopsis thaliana		GO:0016485~protein processing,	GO:0005739~mitochondrion,GO:0016021~integral component of membrane,GO:0031966~mitochondrial membrane,	GO:0004252~serine-type endopeptidase activity,	IPR002610:Peptidase S54, rhomboid,IPR022764:Peptidase S54, rhomboid domain,				Complete proteome,Hydrolase,Membrane,Mitochondrion,Protease,Reference proteome,Transit peptide,Transmembrane,Transmembrane helix,
NODE_187975_length_2312_cov_4.950260	NP_001242751	79.31	2.49e-38	149	polypyrimidine tract-binding protein homolog 3-like(LOC100819672)	Glycine max		GO:0006397~mRNA processing,GO:0045595~regulation of cell differentiation,	GO:0005634~nucleus,	GO:0000166~nucleotide binding,GO:0003723~RNA binding,	IPR000504:RNA recognition motif domain,IPR006536:HnRNP-L/PTB/hephaestus splicing factor,IPR012677:Nucleotide-binding, alpha-beta plait,			SM00360:RRM,	Complete proteome,Reference proteome,
NODE_188305_length_3749_cov_4.727127	NP_001303018	71.795	1.25e-31	129	mitogen-activated protein kinase kinase 1-like(LOC106440874)	Brassica napus				GO:0004672~protein kinase activity,GO:0005524~ATP binding,	IPR000719:Protein kinase, catalytic domain,IPR008271:Serine/threonine-protein kinase, active site,IPR011009:Protein kinase-like domain,			SM00220:S_TKc,	Kinase,Transferase,
NODE_188305_length_3749_cov_4.727127	NP_001314339	75.325	9.03e-32	129	mitogen-activated protein kinase kinase 2-like(LOC107937701)	Gossypium hirsutum				GO:0004674~protein serine/threonine kinase activity,GO:0005524~ATP binding,	IPR000719:Protein kinase, catalytic domain,IPR001245:Serine-threonine/tyrosine-protein kinase catalytic domain,IPR008271:Serine/threonine-protein kinase, active site,IPR011009:Protein kinase-like domain,IPR017441:Protein kinase, ATP binding site,			SM00220:S_TKc,	ATP-binding,Kinase,Nucleotide-binding,Serine/threonine-protein kinase,Transferase,
NODE_188922_length_3865_cov_5.128590	NP_001280749	91.111	6.16e-18	87.4	myb-related protein 308-like(MYB9)	Malus domestica				GO:0003677~DNA binding,	IPR001005:SANT/Myb domain,IPR009057:Homeodomain-like,IPR017930:Myb domain,			SM00717:SANT,
NODE_240064_length_1744_cov_4.837156	NP_001280749	61.765	4.67e-06	50.1	myb-related protein 308-like(MYB9)	Malus domestica				GO:0003677~DNA binding,	IPR001005:SANT/Myb domain,IPR009057:Homeodomain-like,IPR017930:Myb domain,			SM00717:SANT,
NODE_189337_length_3483_cov_5.370083	NP_680769	47.191	1.33e-22	101	S-adenosyl-L-methionine-dependent methyltransferases superfamily protein(AT4G35987)	Arabidopsis thaliana		GO:0032259~methylation,	GO:0009507~chloroplast,	GO:0008168~methyltransferase activity,	IPR019410:Nicotinamide N-methyltransferase-like,	ath00310:Lysine degradation,			Complete proteome,Methyltransferase,Reference proteome,Transferase,
NODE_190415_length_3535_cov_5.523904	NP_001146370	31.955	5.49e-52	129	beta-galactosidase(LOC100279948)	Zea mays		GO:0005975~carbohydrate metabolic process,		GO:0004553~hydrolase activity, hydrolyzing O-glycosyl compounds,GO:0004565~beta-galactosidase activity,GO:0030246~carbohydrate binding,	IPR000922:D-galactoside/L-rhamnose binding SUEL lectin domain,IPR001944:Glycoside hydrolase, family 35,IPR008979:Galactose-binding domain-like,IPR013781:Glycoside hydrolase, catalytic domain,IPR017853:Glycoside hydrolase, superfamily,IPR019801:Glycoside hydrolase, family 35, conserved site,				Complete proteome,Glycosidase,Hydrolase,Reference proteome,Signal,
NODE_190724_length_1753_cov_5.251569	NP_001141631	63.636	1.26e-19	94	uncharacterized LOC100273751(LOC100273751)	Zea mays		GO:0006396~RNA processing,	GO:0009507~chloroplast,	GO:0003723~RNA binding,GO:0008173~RNA methyltransferase activity,	IPR001537:tRNA/rRNA methyltransferase, SpoU,IPR004441:RNA methyltransferase TrmH family,IPR013123:RNA 2-O ribose methyltransferase, substrate binding,			SM00967:SM00967,	Complete proteome,Reference proteome,
NODE_191879_length_1264_cov_4.089399	NP_001275408	46.591	4.14e-14	73.6	pre-mRNA splicing factor-like protein(LOC102577891)	Solanum tuberosum				GO:0000166~nucleotide binding,GO:0003676~nucleic acid binding,	IPR000504:RNA recognition motif domain,IPR012677:Nucleotide-binding, alpha-beta plait,	sot03040:Spliceosome,		SM00360:RRM,	Complete proteome,Reference proteome,
NODE_192322_length_1404_cov_5.280627	NP_566110	38.095	2.51e-20	90.1	TSPO(outer membrane tryptophan-rich sensory protein)-like protein(TSPO)	Arabidopsis thaliana		GO:0006778~porphyrin-containing compound metabolic process,GO:0006810~transport,GO:0006970~response to osmotic stress,GO:0009651~response to salt stress,GO:0009737~response to abscisic acid,	GO:0000139~Golgi membrane,GO:0005739~mitochondrion,GO:0005783~endoplasmic reticulum,GO:0005789~endoplasmic reticulum membrane,GO:0005794~Golgi apparatus,GO:0005795~Golgi stack,GO:0016020~membrane,GO:0016021~integral component of membrane,GO:0031969~chloroplast membrane,	GO:0020037~heme binding,	IPR004307:TspO/MBR-related protein,				Chloroplast,Complete proteome,Endoplasmic reticulum,Golgi apparatus,Membrane,Plastid,Reference proteome,Stress response,Transmembrane,Transmembrane helix,Transport,
NODE_193770_length_2456_cov_4.638029	NP_001314628	73.611	6.79e-18	88.2	heat stress transcription factor A-4b-like(LOC107959648)	Gossypium hirsutum			GO:0005634~nucleus,	GO:0003700~transcription factor activity, sequence-specific DNA binding,GO:0043565~sequence-specific DNA binding,	IPR000232:Heat shock factor (HSF)-type, DNA-binding,IPR011991:Winged helix-turn-helix DNA-binding domain,			SM00415:HSF,	Coiled coil,DNA-binding,Nucleus,
NODE_194232_length_1468_cov_3.602861	NP_001268109	53.191	4.55e-07	52.4	MADS-box protein 2(MADS2)	Vitis vinifera		GO:0000165~MAPK cascade,GO:0006351~transcription, DNA-templated,GO:0045944~positive regulation of transcription from RNA polymerase II promoter,	GO:0005634~nucleus,	GO:0000977~RNA polymerase II regulatory region sequence-specific DNA binding,GO:0003700~transcription factor activity, sequence-specific DNA binding,	IPR002100:Transcription factor, MADS-box,IPR002487:Transcription factor, K-box,			SM00432:MADS,	Complete proteome,DNA-binding,Nucleus,Reference proteome,Transcription,Transcription regulation,
NODE_194232_length_1468_cov_3.602861	NP_001292758	46.809	3.16e-06	50.1	agamous-like MADS-box protein AGL9 homolog(AGL2)	Amborella trichopoda		GO:0000165~MAPK cascade,GO:0006351~transcription, DNA-templated,GO:0045944~positive regulation of transcription from RNA polymerase II promoter,	GO:0005634~nucleus,	GO:0000977~RNA polymerase II regulatory region sequence-specific DNA binding,GO:0003700~transcription factor activity, sequence-specific DNA binding,	IPR002100:Transcription factor, MADS-box,IPR002487:Transcription factor, K-box,			SM00432:MADS,	Coiled coil,Complete proteome,DNA-binding,Nucleus,Reference proteome,Transcription,Transcription regulation,
NODE_194581_length_2254_cov_5.004436	NP_001149341	29.197	2.28e-09	62	serine carboxypeptidase 1(LOC100282964)	Zea mays				GO:0004185~serine-type carboxypeptidase activity,	IPR001563:Peptidase S10, serine carboxypeptidase,IPR018202:Peptidase S10, serine carboxypeptidase, active site,				Carboxypeptidase,Complete proteome,Hydrolase,Protease,Reference proteome,Signal,
NODE_19465_length_1382_cov_5.034732	NP_001143368	80.488	2.19e-15	74.3	uncharacterized LOC100275998(gpm537)	Zea mays					IPR003121:SWIB/MDM2 domain,IPR019835:SWIB domain,			SM00151:SWIB,	Complete proteome,Reference proteome,
NODE_197307_length_1614_cov_5.389095	NP_196860	72.727	7.28e-06	50.4	structural maintenance of chromosomes protein(AT5G13560)	Arabidopsis thaliana			GO:0005739~mitochondrion,GO:0005829~cytosol,						Coiled coil,Complete proteome,Reference proteome,
NODE_662426_length_2094_cov_4.871538	NP_196860	39.552	3.89e-13	74.3	structural maintenance of chromosomes protein(AT5G13560)	Arabidopsis thaliana			GO:0005739~mitochondrion,GO:0005829~cytosol,						Coiled coil,Complete proteome,Reference proteome,
NODE_197766_length_1402_cov_4.579886	NP_001142329	76.087	1.75e-16	82.8	uncharacterized LOC100274499(LOC100274499)	Zea mays	Energy production and conversion,			GO:0008270~zinc ion binding,GO:0016491~oxidoreductase activity,	IPR002085:Alcohol dehydrogenase superfamily, zinc-type,IPR011032:GroES-like,IPR013149:Alcohol dehydrogenase, C-terminal,IPR013154:Alcohol dehydrogenase GroES-like,IPR016040:NAD(P)-binding domain,IPR020843:Polyketide synthase, enoylreductase,			SM00829:SM00829,	Complete proteome,Reference proteome,
NODE_197766_length_1402_cov_4.579886	NP_001331700	69.565	5.28e-15	77.4	GroES-like zinc-binding alcohol dehydrogenase family protein(AT5G63620)	Arabidopsis thaliana	Energy production and conversion,	GO:0055114~oxidation-reduction process,	GO:0005739~mitochondrion,	GO:0008270~zinc ion binding,GO:0016491~oxidoreductase activity,GO:0050897~cobalt ion binding,	IPR002085:Alcohol dehydrogenase superfamily, zinc-type,IPR011032:GroES-like,IPR013149:Alcohol dehydrogenase, C-terminal,IPR013154:Alcohol dehydrogenase GroES-like,IPR016040:NAD(P)-binding domain,IPR020843:Polyketide synthase, enoylreductase,			SM00829:SM00829,	Complete proteome,Reference proteome,
NODE_198715_length_1134_cov_3.391534	NP_001233919	85	7.09e-15	77.4	protein LAX1(SlLAX1)	Solanum lycopersicum			GO:0016021~integral component of membrane,		IPR013057:Amino acid transporter, transmembrane,	sly04075:Plant hormone signal transduction,			Membrane,Transmembrane,Transmembrane helix,
NODE_199060_length_2038_cov_5.419529	NP_001148561	60.465	7.16e-10	63.2	PP2A regulatory subunit TAP46(LOC100282177)	Zea mays		GO:0009966~regulation of signal transduction,			IPR007304:TAP42-like protein,				Complete proteome,Reference proteome,
NODE_199121_length_1269_cov_4.255319	NP_001235840	85.714	2.57e-18	83.2	uncharacterized LOC100527421(LOC100527421)	Glycine max		GO:0006979~response to oxidative stress,		GO:0004602~glutathione peroxidase activity,	IPR000889:Glutathione peroxidase,IPR012336:Thioredoxin-like fold,	gmx00480:Glutathione metabolism,gmx00590:Arachidonic acid metabolism,	PIRSF000303:glutathione peroxidase,		Oxidoreductase,Peroxidase,
NODE_200525_length_2742_cov_5.369074	NP_001237029	55.195	1.67e-50	176	uncharacterized LOC100527251(LOC100527251)	Glycine max				GO:0003677~DNA binding,GO:0008270~zinc ion binding,	IPR000058:Zinc finger, AN1-type,IPR002653:Zinc finger, A20-type,			SM00154:ZnF_AN1,SM00259:ZnF_A20,	Metal-binding,Zinc,Zinc-finger,
NODE_200730_length_1181_cov_4.247248	NP_001312200	59.124	2.64e-42	159	phosphatidylinositol 4-phosphate 5-kinase 6-like(LOC107779007)	Nicotiana tabacum				GO:0005524~ATP binding,GO:0016308~1-phosphatidylinositol-4-phosphate 5-kinase activity,	IPR002498:Phosphatidylinositol-4-phosphate 5-kinase, core,IPR003409:MORN motif,IPR017163:Phosphatidylinositol-4-phosphate 5-kinase, plant,IPR023610:Phosphatidylinositol-4-phosphate 5-kinase,IPR027483:Phosphatidylinositol-4-phosphate 5-kinase, C-terminal,IPR027484:Phosphatidylinositol-4-phosphate 5-kinase, N-terminal domain,		PIRSF037274:phosphatidylinositol-4-phosphate 5-kinase, plant type,	SM00330:PIPKc,SM00698:MORN,	Kinase,Repeat,Transferase,
NODE_20080_length_2407_cov_4.929373	NP_195598	26.159	1.16e-15	81.6	F-box and associated interaction domains-containing protein(AT4G38870)	Arabidopsis thaliana			GO:0005634~nucleus,		IPR001810:F-box domain, cyclin-like,IPR013187:F-box associated domain, type 3,IPR017451:F-box associated interaction domain,			SM00256:FBOX,	Complete proteome,Reference proteome,	chain:Putative F-box protein At4g38870,domain:F-box,
NODE_20080_length_2407_cov_4.929373	NP_189038	26.239	5.18e-14	76.3	F-box and associated interaction domains-containing protein(AT3G23960)	Arabidopsis thaliana			GO:0005634~nucleus,		IPR001810:F-box domain, cyclin-like,IPR013187:F-box associated domain, type 3,IPR017451:F-box associated interaction domain,			SM00256:FBOX,	Complete proteome,Reference proteome,	chain:Putative F-box protein At3g23960,domain:F-box,
NODE_20080_length_2407_cov_4.929373	NP_174520	24.731	2.63e-13	72.8	F-box and associated interaction domains-containing protein(AT1G32420)	Arabidopsis thaliana			GO:0005737~cytoplasm,		IPR001810:F-box domain, cyclin-like,IPR013187:F-box associated domain, type 3,IPR017451:F-box associated interaction domain,			SM00256:FBOX,	Complete proteome,Reference proteome,	chain:Putative F-box protein At1g32420,domain:F-box,
NODE_200834_length_2397_cov_4.056737	NP_001236590	76.562	4.58e-53	199	oxysterol-binding protein(OSBP)	Glycine max					IPR000648:Oxysterol-binding protein,IPR001849:Pleckstrin homology domain,IPR011993:Pleckstrin homology-like domain,			SM00233:PH,	Coiled coil,Complete proteome,Reference proteome,
NODE_69712_length_2282_cov_4.068799	NP_001236590	66.154	6.91e-19	93.2	oxysterol-binding protein(OSBP)	Glycine max					IPR000648:Oxysterol-binding protein,IPR001849:Pleckstrin homology domain,IPR011993:Pleckstrin homology-like domain,			SM00233:PH,	Coiled coil,Complete proteome,Reference proteome,
NODE_201557_length_1698_cov_4.800942	NP_001141969	83.333	2.87e-33	133	aspartate aminotransferase(LOC100274119)	Zea mays		GO:0006520~cellular amino acid metabolic process,GO:0009058~biosynthetic process,	GO:0005739~mitochondrion,	GO:0004069~L-aspartate:2-oxoglutarate aminotransferase activity,GO:0005507~copper ion binding,GO:0030170~pyridoxal phosphate binding,GO:0080130~L-phenylalanine:2-oxoglutarate aminotransferase activity,	IPR000796:Aspartate/other aminotransferase,IPR004838:Aminotransferases, class-I, pyridoxal-phosphate-binding site,IPR004839:Aminotransferase, class I/classII,IPR015421:Pyridoxal phosphate-dependent transferase, major region, subdomain 1,IPR015424:Pyridoxal phosphate-dependent transferase,	zma00220:Arginine biosynthesis,zma00250:Alanine, aspartate and glutamate metabolism,zma00270:Cysteine and methionine metabolism,zma00330:Arginine and proline metabolism,zma00350:Tyrosine metabolism,zma00360:Phenylalanine metabolism,zma00400:Phenylalanine, tyrosine and tryptophan biosynthesis,zma00710:Carbon fixation in photosynthetic organisms,zma00950:Isoquinoline alkaloid biosynthesis,zma00960:…			Aminotransferase,Complete proteome,Reference proteome,Transferase,
NODE_201586_length_1674_cov_4.443847	NP_001234088	65.476	2.64e-27	111	uncharacterized LOC543815(LOC543815)	Solanum lycopersicum		GO:0006749~glutathione metabolic process,GO:0009407~toxin catabolic process,	GO:0005737~cytoplasm,	GO:0004364~glutathione transferase activity,	IPR004045:Glutathione S-transferase, N-terminal,IPR004046:Glutathione S-transferase, C-terminal,IPR010987:Glutathione S-transferase, C-terminal-like,IPR012336:Thioredoxin-like fold,	sly00480:Glutathione metabolism,			Complete proteome,Reference proteome,Transferase,
NODE_747385_length_1349_cov_12.121572	NP_001234088	63.462	3.95e-32	123	uncharacterized LOC543815(LOC543815)	Solanum lycopersicum		GO:0006749~glutathione metabolic process,GO:0009407~toxin catabolic process,	GO:0005737~cytoplasm,	GO:0004364~glutathione transferase activity,	IPR004045:Glutathione S-transferase, N-terminal,IPR004046:Glutathione S-transferase, C-terminal,IPR010987:Glutathione S-transferase, C-terminal-like,IPR012336:Thioredoxin-like fold,	sly00480:Glutathione metabolism,			Complete proteome,Reference proteome,Transferase,
NODE_201586_length_1674_cov_4.443847	NP_001304648	61.905	6.74e-26	107	probable glutathione S-transferase(LOC547583)	Glycine max				GO:0016740~transferase activity,	IPR004045:Glutathione S-transferase, N-terminal,IPR004046:Glutathione S-transferase, C-terminal,IPR010987:Glutathione S-transferase, C-terminal-like,IPR012336:Thioredoxin-like fold,	gmx00480:Glutathione metabolism,			Complete proteome,Reference proteome,Transferase,
NODE_202102_length_2458_cov_4.441009	NP_001147218	36.232	2.6e-06	50.8	RING zinc finger protein-like(LOC100280826)	Zea mays				GO:0008270~zinc ion binding,	IPR001841:Zinc finger, RING-type,IPR011016:Zinc finger, RING-CH-type,IPR013083:Zinc finger, RING/FYVE/PHD-type,			SM00184:RING,SM00744:RINGv,	Complete proteome,Metal-binding,Reference proteome,Zinc,Zinc-finger,
NODE_202727_length_2131_cov_4.833412	NP_001276299	59.873	3.98e-49	174	steroid 5-alpha-reductase DET2-like(LOC100797930)	Glycine max		GO:0006629~lipid metabolic process,	GO:0005737~cytoplasm,GO:0016021~integral component of membrane,	GO:0016627~oxidoreductase activity, acting on the CH-CH group of donors,	IPR001104:3-oxo-5-alpha-steroid 4-dehydrogenase, C-terminal,				Complete proteome,Membrane,Reference proteome,Transmembrane,Transmembrane helix,
NODE_202727_length_2131_cov_4.833412	NP_001314480	45.833	2.71e-15	77.8	steroid 5-alpha-reductase DET2(LOC107948867)	Gossypium hirsutum		GO:0016132~brassinosteroid biosynthetic process,GO:0055114~oxidation-reduction process,GO:0090377~seed trichome initiation,GO:0090378~seed trichome elongation,	GO:0005737~cytoplasm,GO:0016021~integral component of membrane,	GO:0003865~3-oxo-5-alpha-steroid 4-dehydrogenase activity,GO:0047751~cholestenone 5-alpha-reductase activity,GO:0050213~progesterone 5-alpha-reductase activity,	IPR001104:3-oxo-5-alpha-steroid 4-dehydrogenase, C-terminal,IPR016636:3-oxo-5-alpha-steroid 4-dehydrogenase,		PIRSF015596:3-oxo-5-alpha-steroid 4-dehydrogenase 2,		Membrane,NADP,Oxidoreductase,Transmembrane,Transmembrane helix,
NODE_202727_length_2131_cov_4.833412	NP_001234040	40	9.25e-14	73.2	steroid 5 alpha reductase DET2(det2)	Solanum lycopersicum		GO:0016132~brassinosteroid biosynthetic process,GO:0055114~oxidation-reduction process,	GO:0005737~cytoplasm,GO:0016021~integral component of membrane,	GO:0003865~3-oxo-5-alpha-steroid 4-dehydrogenase activity,GO:0047751~cholestenone 5-alpha-reductase activity,GO:0050213~progesterone 5-alpha-reductase activity,	IPR001104:3-oxo-5-alpha-steroid 4-dehydrogenase, C-terminal,IPR016636:3-oxo-5-alpha-steroid 4-dehydrogenase,	sly00905:Brassinosteroid biosynthesis,sly01100:Metabolic pathways,sly01110:Biosynthesis of secondary metabolites,	PIRSF015596:3-oxo-5-alpha-steroid 4-dehydrogenase 2,		Complete proteome,Membrane,NADP,Oxidoreductase,Reference proteome,Transmembrane,Transmembrane helix,
NODE_202863_length_2008_cov_4.673307	NP_176170	56.784	4.83e-41	162	dynamin-like 3(DL3)	Arabidopsis thaliana		GO:0000266~mitochondrial fission,GO:0009737~response to abscisic acid,GO:0048766~root hair initiation,GO:0072583~clathrin-mediated endocytosis,GO:2000114~regulation of establishment of cell polarity,	GO:0005737~cytoplasm,GO:0005773~vacuole,GO:0005829~cytosol,GO:0005874~microtubule,GO:0005886~plasma membrane,GO:0009504~cell plate,GO:0009506~plasmodesma,GO:0045334~clathrin-coated endocytic vesicle,	GO:0003924~GTPase activity,GO:0005515~protein binding,GO:0005525~GTP binding,GO:0008017~microtubule binding,GO:0030276~clathrin binding,	IPR000375:Dynamin central domain,IPR001401:Dynamin, GTPase domain,IPR001849:Pleckstrin homology domain,IPR003130:Dynamin GTPase effector,IPR011993:Pleckstrin homology-like domain,IPR019762:Dynamin, GTPase region, conserved site,IPR020850:GTPase effector domain, GED,IPR022812:Dynamin,IPR027417:P-loop containing nucleoside triphosphate hydrolase,	ath04144:Endocytosis,		SM00053:DYNc,SM00233:PH,	Acetylation,Coiled coil,Complete proteome,Cytoplasm,Cytoskeleton,GTP-binding,Hydrolase,Microtubule,Motor protein,Nucleotide-binding,Reference proteome,	chain:Dynamin-2B,compositionally biased region:Pro-rich,domain:GED,domain:PH,modified residue,nucleotide phosphate-binding region:GTP,
NODE_202863_length_2008_cov_4.673307	NP_172500	55.276	7.09e-39	155	dynamin-like protein 6(ADL6)	Arabidopsis thaliana		GO:0000266~mitochondrial fission,GO:0006896~Golgi to vacuole transport,	GO:0000139~Golgi membrane,GO:0005737~cytoplasm,GO:0005774~vacuolar membrane,GO:0005794~Golgi apparatus,GO:0005829~cytosol,GO:0005874~microtubule,GO:0005886~plasma membrane,GO:0009506~plasmodesma,GO:0009524~phragmoplast,GO:0016020~membrane,GO:0030136~clathrin-coated vesicle,	GO:0003924~GTPase activity,GO:0005525~GTP binding,GO:0008017~microtubule binding,GO:0008289~lipid binding,	IPR000375:Dynamin central domain,IPR001401:Dynamin, GTPase domain,IPR001849:Pleckstrin homology domain,IPR003130:Dynamin GTPase effector,IPR011993:Pleckstrin homology-like domain,IPR019762:Dynamin, GTPase region, conserved site,IPR020850:GTPase effector domain, GED,IPR022812:Dynamin,IPR027417:P-loop containing nucleoside triphosphate hydrolase,	ath04144:Endocytosis,		SM00053:DYNc,SM00233:PH,	Acetylation,Coiled coil,Complete proteome,Cytoplasm,Cytoplasmic vesicle,Cytoskeleton,Golgi apparatus,GTP-binding,Hydrolase,Lipid-binding,Membrane,Microtubule,Motor protein,Nucleotide-binding,Reference proteome,	chain:Dynamin-2A,compositionally biased region:Pro-rich,domain:GED,domain:PH,modified residue,mutagenesis site,nucleotide phosphate-binding region:GTP,sequence conflict,
NODE_203918_length_1339_cov_4.865571	NP_001315719	83.529	2.91e-42	154	transcription repressor MYB5-like(LOC103412644)	Malus domestica				GO:0003677~DNA binding,	IPR001005:SANT/Myb domain,IPR009057:Homeodomain-like,IPR017930:Myb domain,			SM00717:SANT,
NODE_203_length_1564_cov_5.466113	NP_177951	59.441	8.99e-41	159	transferases, transferring glycosyl groups(AT1G78280)	Arabidopsis thaliana		GO:0007166~cell surface receptor signaling pathway,	GO:0005634~nucleus,GO:0005829~cytosol,	GO:0016757~transferase activity, transferring glycosyl groups,	IPR001810:F-box domain, cyclin-like,IPR002575:Aminoglycoside phosphotransferase,IPR003347:JmjC domain,IPR011009:Protein kinase-like domain,			SM00558:JmjC,	Complete proteome,Reference proteome,	chain:F-box protein At1g78280,domain:F-box,splice variant,
NODE_51165_length_1589_cov_4.977973	NP_177951	38.75	1.54e-29	110	transferases, transferring glycosyl groups(AT1G78280)	Arabidopsis thaliana		GO:0007166~cell surface receptor signaling pathway,	GO:0005634~nucleus,GO:0005829~cytosol,	GO:0016757~transferase activity, transferring glycosyl groups,	IPR001810:F-box domain, cyclin-like,IPR002575:Aminoglycoside phosphotransferase,IPR003347:JmjC domain,IPR011009:Protein kinase-like domain,			SM00558:JmjC,	Complete proteome,Reference proteome,	chain:F-box protein At1g78280,domain:F-box,splice variant,
NODE_51165_length_1589_cov_4.977973	NP_177951	68.182	2.03e-13	74.7	transferases, transferring glycosyl groups(AT1G78280)	Arabidopsis thaliana		GO:0007166~cell surface receptor signaling pathway,	GO:0005634~nucleus,GO:0005829~cytosol,	GO:0016757~transferase activity, transferring glycosyl groups,	IPR001810:F-box domain, cyclin-like,IPR002575:Aminoglycoside phosphotransferase,IPR003347:JmjC domain,IPR011009:Protein kinase-like domain,			SM00558:JmjC,	Complete proteome,Reference proteome,	chain:F-box protein At1g78280,domain:F-box,splice variant,
NODE_204525_length_1671_cov_4.595452	NP_001147889	85.965	4.97e-45	107	fimbrin 1(LOC100281499)	Zea mays					IPR001589:Actinin-type, actin-binding, conserved site,IPR001715:Calponin homology domain,			SM00033:CH,	Actin-binding,Complete proteome,Reference proteome,Repeat,
NODE_204819_length_2408_cov_4.909053	NP_001190900	48.684	1.58e-08	59.3	Transducin family protein / WD-40 repeat family protein(CDC20.2)	Arabidopsis thaliana		GO:0007067~mitotic nuclear division,GO:0007165~signal transduction,GO:0016567~protein ubiquitination,GO:0051301~cell division,GO:1904668~positive regulation of ubiquitin protein ligase activity,	GO:0005634~nucleus,GO:0005737~cytoplasm,GO:0005834~heterotrimeric G-protein complex,GO:0033597~mitotic checkpoint complex,	GO:0004871~signal transducer activity,GO:0005515~protein binding,GO:0010997~anaphase-promoting complex binding,GO:0019900~kinase binding,GO:0097027~ubiquitin-protein transferase activator activity,	IPR001680:WD40 repeat,IPR015943:WD40/YVTN repeat-like-containing domain,IPR017986:WD40-repeat-containing domain,IPR019775:WD40 repeat, conserved site,IPR024977:Anaphase-promoting complex subunit 4, WD40 domain,	ath04120:Ubiquitin mediated proteolysis,		SM00320:WD40,	Alternative splicing,Cell cycle,Cell division,Complete proteome,Mitosis,Nucleus,Reference proteome,Repeat,Ubl conjugation pathway,WD repeat,
NODE_205358_length_1787_cov_4.298825	NP_001149208	75	7.9e-11	63.2	peptidyl-prolyl cis-trans isomerase H(LOC100282830)	Zea mays		GO:0006457~protein folding,		GO:0003755~peptidyl-prolyl cis-trans isomerase activity,	IPR002130:Cyclophilin-like peptidyl-prolyl cis-trans isomerase domain,IPR020892:Cyclophilin-type peptidyl-prolyl cis-trans isomerase, conserved site,IPR024936:Cyclophilin-type peptidyl-prolyl cis-trans isomerase,	zma03040:Spliceosome,	PIRSF001467:peptidyl-prolyl cis-trans isomerase,		Complete proteome,Isomerase,Reference proteome,Rotamase,
NODE_205460_length_1656_cov_5.126208	NP_001237401	85.124	6.78e-62	205	uncharacterized LOC100306092(LOC100306092)	Glycine max			GO:0016021~integral component of membrane,	GO:0005215~transporter activity,	IPR000425:Major intrinsic protein,IPR022357:Major intrinsic protein, conserved site,IPR023271:Aquaporin-like,				Complete proteome,Membrane,Reference proteome,Transmembrane,Transmembrane helix,Transport,
NODE_205638_length_2192_cov_5.404653	NP_172898	33.476	3.44e-22	103	AAA-type ATPase family protein(AT1G14460)	Arabidopsis thaliana		GO:0006260~DNA replication,GO:0006261~DNA-dependent DNA replication,	GO:0005634~nucleus,GO:0005663~DNA replication factor C complex,GO:0005886~plasma membrane,GO:0009360~DNA polymerase III complex,	GO:0003677~DNA binding,GO:0003887~DNA-directed DNA polymerase activity,GO:0005524~ATP binding,	IPR003593:AAA+ ATPase domain,IPR008921:DNA polymerase III, clamp loader complex, gamma/delta/delta subunit, C-terminal,IPR012763:DNA polymerase III, subunit gamma/ tau,IPR022754:DNA polymerase III, gamma subunit, domain III,IPR027417:P-loop containing nucleoside triphosphate hydrolase,			SM00382:AAA,	ATP-binding,Coiled coil,Complete proteome,Nucleotide-binding,Reference proteome,Repeat,
NODE_205682_length_1397_cov_4.630637	NP_001146420	75.758	2.65e-09	60.8	uncharacterized LOC100280000(pco068830(713))	Zea mays				GO:0005096~GTPase activator activity,	IPR001164:Arf GTPase activating protein,			SM00105:ArfGap,	Complete proteome,Reference proteome,
NODE_579692_length_3127_cov_4.934442	NP_001146420	50	2.33e-27	79.3	uncharacterized LOC100280000(pco068830(713))	Zea mays				GO:0005096~GTPase activator activity,	IPR001164:Arf GTPase activating protein,			SM00105:ArfGap,	Complete proteome,Reference proteome,
NODE_205938_length_1793_cov_5.784161	NP_001234470	65.306	1.41e-12	70.5	xyloglucan endotransglucosylase-hydrolase XTH5(XTH5)	Solanum lycopersicum		GO:0010411~xyloglucan metabolic process,GO:0042546~cell wall biogenesis,GO:0071555~cell wall organization,	GO:0005618~cell wall,GO:0048046~apoplast,	GO:0004553~hydrolase activity, hydrolyzing O-glycosyl compounds,GO:0016762~xyloglucan:xyloglucosyl transferase activity,	IPR000757:Glycoside hydrolase, family 16,IPR010713:Xyloglucan endo-transglycosylase, C-terminal,IPR013320:Concanavalin A-like lectin/glucanase, subgroup,IPR016455:Xyloglucan endotransglucosylase/hydrolase,		PIRSF005604:xyloglucan endotransglucosylase/hydrolase,		Apoplast,Cell wall,Cell wall biogenesis/degradation,Complete proteome,Glycosidase,Hydrolase,Reference proteome,Secreted,Signal,Transferase,
NODE_205938_length_1793_cov_5.784161	NP_001146328	69.388	4.91e-12	68.9	uncharacterized LOC100279904(cl58136_1)	Zea mays		GO:0005975~carbohydrate metabolic process,GO:0010411~xyloglucan metabolic process,GO:0042546~cell wall biogenesis,GO:0071555~cell wall organization,	GO:0005618~cell wall,GO:0048046~apoplast,	GO:0004553~hydrolase activity, hydrolyzing O-glycosyl compounds,GO:0016762~xyloglucan:xyloglucosyl transferase activity,	IPR000757:Glycoside hydrolase, family 16,IPR010713:Xyloglucan endo-transglycosylase, C-terminal,IPR013320:Concanavalin A-like lectin/glucanase, subgroup,IPR016455:Xyloglucan endotransglucosylase/hydrolase,		PIRSF005604:xyloglucan endotransglucosylase/hydrolase,		Apoplast,Cell wall,Cell wall biogenesis/degradation,Complete proteome,Glycosidase,Hydrolase,Reference proteome,Secreted,Signal,Transferase,
NODE_20674_length_985_cov_3.520812	NP_001295449	50.467	3.68e-19	87.4	v-myb avian myeloblastosis viral oncogene homolog(MYB)	Fragaria vesca				GO:0003677~DNA binding,	IPR001005:SANT/Myb domain,IPR009057:Homeodomain-like,IPR017930:Myb domain,			SM00717:SANT,
NODE_207008_length_1683_cov_4.720142	NP_001150879	58.14	2.79e-09	58.9	NAC domain-containing protein 78(LOC100284512)	Zea mays		GO:0006351~transcription, DNA-templated,GO:0006355~regulation of transcription, DNA-templated,	GO:0005634~nucleus,	GO:0003677~DNA binding,	IPR003441:No apical meristem (NAM) protein,				Complete proteome,DNA-binding,Nucleus,Reference proteome,Transcription,Transcription regulation,
NODE_207643_length_2021_cov_4.571004	NP_188428	84.091	1.89e-16	82.8	WUSCHEL related homeobox 1(WOX1)	Arabidopsis thaliana		GO:0006351~transcription, DNA-templated,GO:0006355~regulation of transcription, DNA-templated,GO:0099402~plant organ development,	GO:0005634~nucleus,GO:0005829~cytosol,	GO:0003677~DNA binding,GO:0003700~transcription factor activity, sequence-specific DNA binding,	IPR001356:Homeodomain,IPR009057:Homeodomain-like,			SM00389:HOX,	Complete proteome,Developmental protein,DNA-binding,Homeobox,Nucleus,Reference proteome,Transcription,Transcription regulation,	chain:WUSCHEL-related homeobox 1,DNA-binding region:Homeobox; WUS-type,sequence conflict,
NODE_390365_length_1518_cov_4.719368	NP_188428	58.537	8.62e-23	100	WUSCHEL related homeobox 1(WOX1)	Arabidopsis thaliana		GO:0006351~transcription, DNA-templated,GO:0006355~regulation of transcription, DNA-templated,GO:0099402~plant organ development,	GO:0005634~nucleus,GO:0005829~cytosol,	GO:0003677~DNA binding,GO:0003700~transcription factor activity, sequence-specific DNA binding,	IPR001356:Homeodomain,IPR009057:Homeodomain-like,			SM00389:HOX,	Complete proteome,Developmental protein,DNA-binding,Homeobox,Nucleus,Reference proteome,Transcription,Transcription regulation,	chain:WUSCHEL-related homeobox 1,DNA-binding region:Homeobox; WUS-type,sequence conflict,
NODE_207643_length_2021_cov_4.571004	NP_565429	87.179	3.22e-14	75.1	Homeodomain-like superfamily protein(WUS)	Arabidopsis thaliana		GO:0006351~transcription, DNA-templated,GO:0006355~regulation of transcription, DNA-templated,GO:0010492~maintenance of shoot apical meristem identity,GO:0019827~stem cell population maintenance,GO:0030154~cell differentiation,GO:0048477~oogenesis,GO:0048653~anther development,GO:0080166~stomium development,	GO:0005634~nucleus,	GO:0003677~DNA binding,GO:0003700~transcription factor activity, sequence-specific DNA binding,GO:0005515~protein binding,	IPR001356:Homeodomain,IPR009057:Homeodomain-like,			SM00389:HOX,	Activator,Complete proteome,Developmental protein,Differentiation,DNA-binding,Flowering,Homeobox,Nucleus,Oogenesis,Reference proteome,Transcription,Transcription regulation,	chain:Protein WUSCHEL,compositionally biased region:His-rich,DNA-binding region:Homeobox; WUS-type,mutagenesis site,sequence conflict,
NODE_208374_length_3836_cov_4.607143	NP_001331750	85	5.2e-14	77	GTP-binding protein, HflX(AT5G57960)	Arabidopsis thaliana			GO:0009507~chloroplast,	GO:0005525~GTP binding,GO:0043022~ribosome binding,	IPR005225:Small GTP-binding protein domain,IPR006073:GTP binding domain,IPR016496:GTPase HflX,IPR025121:GTPase HflX N-terminal domain,IPR027417:P-loop containing nucleoside triphosphate hydrolase,				Complete proteome,Reference proteome,
NODE_208374_length_3836_cov_4.607143	NP_001331750	92.105	1.77e-13	75.1	GTP-binding protein, HflX(AT5G57960)	Arabidopsis thaliana			GO:0009507~chloroplast,	GO:0005525~GTP binding,GO:0043022~ribosome binding,	IPR005225:Small GTP-binding protein domain,IPR006073:GTP binding domain,IPR016496:GTPase HflX,IPR025121:GTPase HflX N-terminal domain,IPR027417:P-loop containing nucleoside triphosphate hydrolase,				Complete proteome,Reference proteome,
NODE_208750_length_1403_cov_4.385602	NP_001150649	80	1.34e-08	58.2	nucleic acid binding protein(LOC100284282)	Zea mays				GO:0000166~nucleotide binding,GO:0003676~nucleic acid binding,	IPR000504:RNA recognition motif domain,IPR012677:Nucleotide-binding, alpha-beta plait,			SM00360:RRM,	Complete proteome,Reference proteome,
NODE_209171_length_3000_cov_4.451334	NP_001236460	91.429	2.88e-14	72.8	uncharacterized LOC100305515(LOC100305515)	Glycine max			GO:0005730~nucleolus,	GO:0003723~RNA binding,	IPR002415:H/ACA ribonucleoprotein complex, subunit Nhp2, eukaryote,IPR004038:Ribosomal protein L7Ae/L30e/S12e/Gadd45,IPR018492:Ribosomal protein L7Ae/L8/Nhp2 family,	gmx03008:Ribosome biogenesis in eukaryotes,			Complete proteome,Reference proteome,
NODE_209417_length_1982_cov_4.421292	NP_001140598	42.056	1.39e-13	75.1	uncharacterized LOC100272669(cl17367_1(196))	Zea mays		GO:0006338~chromatin remodeling,	GO:0031011~Ino80 complex,		IPR004000:Actin-related protein,			SM00268:ACTIN,	Complete proteome,Reference proteome,
NODE_209849_length_1224_cov_3.830882	NP_001152479	71.154	1.2e-16	83.6	uncharacterized LOC100286119(pco138071)	Zea mays				GO:0003676~nucleic acid binding,	IPR000467:G-patch domain,IPR001374:Single-stranded nucleic acid binding R3H,			SM00443:G_patch,	Complete proteome,Reference proteome,
NODE_209849_length_1224_cov_3.830882	NP_001152479	62.5	1.85e-14	77	uncharacterized LOC100286119(pco138071)	Zea mays				GO:0003676~nucleic acid binding,	IPR000467:G-patch domain,IPR001374:Single-stranded nucleic acid binding R3H,			SM00443:G_patch,	Complete proteome,Reference proteome,
NODE_209849_length_1224_cov_3.830882	NP_566359	59.259	3.53e-14	75.9	D111/G-patch domain-containing protein(AT3G09850)	Arabidopsis thaliana			GO:0005622~intracellular,GO:0005634~nucleus,	GO:0003676~nucleic acid binding,	IPR000467:G-patch domain,			SM00443:G_patch,	Complete proteome,Reference proteome,
NODE_210220_length_1433_cov_3.893929	NP_001148319	81.538	6.51e-37	144	uncharacterized LOC100281928(si707066f01)	Zea mays		GO:0006564~L-serine biosynthetic process,		GO:0004617~phosphoglycerate dehydrogenase activity,GO:0016597~amino acid binding,GO:0051287~NAD binding,	IPR002912:ACT domain,IPR006139:D-isomer specific 2-hydroxyacid dehydrogenase, catalytic domain,IPR006140:D-isomer specific 2-hydroxyacid dehydrogenase, NAD-binding,IPR006236:D-3-phosphoglycerate dehydrogenase,IPR016040:NAD(P)-binding domain,	zma00260:Glycine, serine and threonine metabolism,zma01100:Metabolic pathways,zma01130:Biosynthesis of antibiotics,zma01200:Carbon metabolism,zma01230:Biosynthesis of amino acids,			Amino-acid biosynthesis,NAD,Oxidoreductase,Serine biosynthesis,
NODE_210666_length_2635_cov_5.291841	NP_001275529	70	1.09e-91	303	nitrate transporter 1.1-like(LOC101213948)	Cucumis sativus		GO:0006857~oligopeptide transport,	GO:0016021~integral component of membrane,	GO:0005215~transporter activity,	IPR000109:Proton-dependent oligopeptide transporter family,IPR018456:PTR2 family proton/oligopeptide symporter, conserved site,IPR020846:Major facilitator superfamily domain,				Complete proteome,Membrane,Reference proteome,Transmembrane,Transmembrane helix,
NODE_333032_length_3277_cov_5.236192	NP_001275529	83.607	2.33e-23	107	nitrate transporter 1.1-like(LOC101213948)	Cucumis sativus		GO:0006857~oligopeptide transport,	GO:0016021~integral component of membrane,	GO:0005215~transporter activity,	IPR000109:Proton-dependent oligopeptide transporter family,IPR018456:PTR2 family proton/oligopeptide symporter, conserved site,IPR020846:Major facilitator superfamily domain,				Complete proteome,Membrane,Reference proteome,Transmembrane,Transmembrane helix,
NODE_630047_length_2405_cov_8.970894	NP_001275529	61.333	5.3e-20	96.3	nitrate transporter 1.1-like(LOC101213948)	Cucumis sativus		GO:0006857~oligopeptide transport,	GO:0016021~integral component of membrane,	GO:0005215~transporter activity,	IPR000109:Proton-dependent oligopeptide transporter family,IPR018456:PTR2 family proton/oligopeptide symporter, conserved site,IPR020846:Major facilitator superfamily domain,				Complete proteome,Membrane,Reference proteome,Transmembrane,Transmembrane helix,
NODE_210666_length_2635_cov_5.291841	NP_001312849	66.531	5.59e-87	290	protein NRT1/ PTR FAMILY 6.3-like(LOC107814217)	Nicotiana tabacum		GO:0006857~oligopeptide transport,	GO:0016021~integral component of membrane,	GO:0005215~transporter activity,	IPR000109:Proton-dependent oligopeptide transporter family,IPR018456:PTR2 family proton/oligopeptide symporter, conserved site,IPR020846:Major facilitator superfamily domain,				Membrane,Transmembrane,Transmembrane helix,Transport,
NODE_630047_length_2405_cov_8.970894	NP_001312849	57.333	2.95e-16	84.3	protein NRT1/ PTR FAMILY 6.3-like(LOC107814217)	Nicotiana tabacum		GO:0006857~oligopeptide transport,	GO:0016021~integral component of membrane,	GO:0005215~transporter activity,	IPR000109:Proton-dependent oligopeptide transporter family,IPR018456:PTR2 family proton/oligopeptide symporter, conserved site,IPR020846:Major facilitator superfamily domain,				Membrane,Transmembrane,Transmembrane helix,Transport,
NODE_210713_length_1477_cov_5.077860	NP_001143620	80	9.52e-19	89.4	uncharacterized LOC100276336(LOC100276336)	Zea mays			GO:0016021~integral component of membrane,						Coiled coil,Complete proteome,Membrane,Reference proteome,Transmembrane,Transmembrane helix,
NODE_21122_length_1963_cov_4.592461	NP_001104941	54.286	1.4e-09	62.8	uncharacterized LOC541786(cl1511_1)	Zea mays	Translation, ribosomal structure and biogenesis,	GO:0009058~biosynthetic process,	GO:0005737~cytoplasm,	GO:0008168~methyltransferase activity,GO:0030170~pyridoxal phosphate binding,GO:0030732~methionine S-methyltransferase activity,	IPR004839:Aminotransferase, class I/classII,IPR015421:Pyridoxal phosphate-dependent transferase, major region, subdomain 1,IPR015422:Pyridoxal phosphate-dependent transferase, major region, subdomain 2,IPR015424:Pyridoxal phosphate-dependent transferase,IPR025714:Methyltransferase domain,IPR025779:Methionine S-methyltransferase,	zma00450:Selenocompound metabolism,			Coiled coil,Complete proteome,Cytoplasm,Methyltransferase,Reference proteome,S-adenosyl-L-methionine,Transferase,	chain:Methionine S-methyltransferase,sequence conflict,
NODE_211680_length_961_cov_3.772112	NP_001233998	64.865	2.25e-09	60.1	oligopeptide transporter 1(OPT1)	Solanum lycopersicum		GO:0006857~oligopeptide transport,	GO:0016021~integral component of membrane,	GO:0005215~transporter activity,	IPR000109:Proton-dependent oligopeptide transporter family,IPR018456:PTR2 family proton/oligopeptide symporter, conserved site,IPR020846:Major facilitator superfamily domain,				Complete proteome,Membrane,Reference proteome,Transmembrane,Transmembrane helix,Transport,
NODE_468471_length_1595_cov_4.549216	NP_001233998	54.545	2.85e-08	57.8	oligopeptide transporter 1(OPT1)	Solanum lycopersicum		GO:0006857~oligopeptide transport,	GO:0016021~integral component of membrane,	GO:0005215~transporter activity,	IPR000109:Proton-dependent oligopeptide transporter family,IPR018456:PTR2 family proton/oligopeptide symporter, conserved site,IPR020846:Major facilitator superfamily domain,				Complete proteome,Membrane,Reference proteome,Transmembrane,Transmembrane helix,Transport,
NODE_211680_length_961_cov_3.772112	NP_001312659	64.865	9.18e-09	58.2	protein NRT1/ PTR FAMILY 8.3-like(LOC107803059)	Nicotiana tabacum		GO:0006857~oligopeptide transport,	GO:0016021~integral component of membrane,	GO:0005215~transporter activity,	IPR000109:Proton-dependent oligopeptide transporter family,IPR018456:PTR2 family proton/oligopeptide symporter, conserved site,IPR020846:Major facilitator superfamily domain,				Membrane,Transmembrane,Transmembrane helix,Transport,
NODE_468471_length_1595_cov_4.549216	NP_001312659	50	1.22e-07	55.8	protein NRT1/ PTR FAMILY 8.3-like(LOC107803059)	Nicotiana tabacum		GO:0006857~oligopeptide transport,	GO:0016021~integral component of membrane,	GO:0005215~transporter activity,	IPR000109:Proton-dependent oligopeptide transporter family,IPR018456:PTR2 family proton/oligopeptide symporter, conserved site,IPR020846:Major facilitator superfamily domain,				Membrane,Transmembrane,Transmembrane helix,Transport,
NODE_212193_length_2994_cov_5.256179	NP_191278	52.381	4e-13	73.9	peptide chain release factor(PrfB3)	Arabidopsis thaliana		GO:0006415~translational termination,GO:0009658~chloroplast organization,GO:0040008~regulation of growth,GO:0043488~regulation of mRNA stability,	GO:0005737~cytoplasm,GO:0009507~chloroplast,GO:0009570~chloroplast stroma,	GO:0003730~mRNA 3'-UTR binding,GO:0003747~translation release factor activity,GO:0016149~translation release factor activity, codon specific,GO:0043022~ribosome binding,GO:0043565~sequence-specific DNA binding,	IPR000352:Peptide chain release factor class I/class II,IPR005139:Peptide chain release factor,IPR014720:Double-stranded RNA-binding-like domain,			SM00937:SM00937,	Chloroplast,Complete proteome,Growth regulation,Plastid,Reference proteome,RNA-binding,Transit peptide,
NODE_214009_length_2210_cov_5.504525	NP_001236499	54.472	8.62e-40	151	zinc transporter protein ZIP1(LOC547695)	Glycine max		GO:0071577~zinc II ion transmembrane transport,	GO:0005886~plasma membrane,GO:0016021~integral component of membrane,	GO:0005385~zinc ion transmembrane transporter activity,	IPR003689:Zinc/iron permease,IPR004698:Zinc/iron permease, fungal/plant,				Complete proteome,Ion transport,Membrane,Reference proteome,Signal,Transmembrane,Transmembrane helix,Transport,
NODE_21408_length_1089_cov_4.719926	NP_001236879	48.485	5.85e-06	38.9	uncharacterized LOC100305545(LOC100305545)	Glycine max				GO:0009055~electron carrier activity,	IPR003245:Plastocyanin-like,IPR008972:Cupredoxin,				Signal,
NODE_214514_length_2876_cov_4.901947	NP_001131710	69.307	1.66e-38	148	cell division control protein 50(LOC100193072)	Zea mays		GO:0051301~cell division,	GO:0016021~integral component of membrane,		IPR005045:Protein of unknown function DUF284, transmembrane eukaryotic,		PIRSF015840:Lem3/Cdc50,		Cell cycle,Cell division,Complete proteome,Membrane,Reference proteome,Transmembrane,Transmembrane helix,
NODE_214796_length_2701_cov_5.012958	NP_001276301	82.143	3.37e-06	50.1	peptidyl-tRNA hydrolase 2, mitochondrial-like(LOC102664938)	Glycine max				GO:0004045~aminoacyl-tRNA hydrolase activity,	IPR002833:Peptidyl-tRNA hydrolase, PTH2,IPR023476:Peptidyl-tRNA hydrolase II domain,				Complete proteome,Reference proteome,
NODE_214796_length_2701_cov_5.012958	NP_568340	82.143	3.91e-06	49.3	Peptidyl-tRNA hydrolase II (PTH2) family protein(AT5G16870)	Arabidopsis thaliana			GO:0005739~mitochondrion,	GO:0004045~aminoacyl-tRNA hydrolase activity,	IPR002833:Peptidyl-tRNA hydrolase, PTH2,IPR023476:Peptidyl-tRNA hydrolase II domain,				Complete proteome,Hydrolase,Reference proteome,Signal,
NODE_214963_length_2744_cov_4.574344	NP_182290	63.793	1.27e-33	85.5	zinc finger (CCCH type) helicase family protein(AT2G47680)	Arabidopsis thaliana	General function prediction only,	GO:0006139~nucleobase-containing compound metabolic process,GO:0006396~RNA processing,	GO:0005634~nucleus,GO:0005737~cytoplasm,GO:0009507~chloroplast,	GO:0003676~nucleic acid binding,GO:0003677~DNA binding,GO:0003729~mRNA binding,GO:0004004~ATP-dependent RNA helicase activity,GO:0004386~helicase activity,GO:0005524~ATP binding,GO:0044822~poly(A) RNA binding,GO:0046872~metal ion binding,	IPR000571:Zinc finger, CCCH-type,IPR001650:Helicase, C-terminal,IPR011545:DNA/RNA helicase, DEAD/DEAH box type, N-terminal,IPR014001:Helicase, superfamily 1/2, ATP-binding domain,IPR027417:P-loop containing nucleoside triphosphate hydrolase,			SM00356:ZnF_C3H1,SM00487:DEXDc,SM00490:HELICc,	ATP-binding,Complete proteome,DNA-binding,Helicase,Hydrolase,Metal-binding,Nucleotide-binding,Reference proteome,Repeat,RNA-binding,Zinc,Zinc-finger,	chain:Zinc finger CCCH domain-containing protein 31,compositionally biased region:Poly-Ser,domain:Helicase ATP-binding,domain:Helicase C-terminal,nucleotide phosphate-binding region:ATP,short sequence motif:DEAH box,zinc finger region:C3H1-type 1,zinc finger region:C3H1-type 2,
NODE_214963_length_2744_cov_4.574344	NP_182290	80.435	1.27e-33	79	zinc finger (CCCH type) helicase family protein(AT2G47680)	Arabidopsis thaliana	General function prediction only,	GO:0006139~nucleobase-containing compound metabolic process,GO:0006396~RNA processing,	GO:0005634~nucleus,GO:0005737~cytoplasm,GO:0009507~chloroplast,	GO:0003676~nucleic acid binding,GO:0003677~DNA binding,GO:0003729~mRNA binding,GO:0004004~ATP-dependent RNA helicase activity,GO:0004386~helicase activity,GO:0005524~ATP binding,GO:0044822~poly(A) RNA binding,GO:0046872~metal ion binding,	IPR000571:Zinc finger, CCCH-type,IPR001650:Helicase, C-terminal,IPR011545:DNA/RNA helicase, DEAD/DEAH box type, N-terminal,IPR014001:Helicase, superfamily 1/2, ATP-binding domain,IPR027417:P-loop containing nucleoside triphosphate hydrolase,			SM00356:ZnF_C3H1,SM00487:DEXDc,SM00490:HELICc,	ATP-binding,Complete proteome,DNA-binding,Helicase,Hydrolase,Metal-binding,Nucleotide-binding,Reference proteome,Repeat,RNA-binding,Zinc,Zinc-finger,	chain:Zinc finger CCCH domain-containing protein 31,compositionally biased region:Poly-Ser,domain:Helicase ATP-binding,domain:Helicase C-terminal,nucleotide phosphate-binding region:ATP,short sequence motif:DEAH box,zinc finger region:C3H1-type 1,zinc finger region:C3H1-type 2,
NODE_649554_length_1145_cov_5.463756	NP_182290	64.211	6.47e-31	107	zinc finger (CCCH type) helicase family protein(AT2G47680)	Arabidopsis thaliana	General function prediction only,	GO:0006139~nucleobase-containing compound metabolic process,GO:0006396~RNA processing,	GO:0005634~nucleus,GO:0005737~cytoplasm,GO:0009507~chloroplast,	GO:0003676~nucleic acid binding,GO:0003677~DNA binding,GO:0003729~mRNA binding,GO:0004004~ATP-dependent RNA helicase activity,GO:0004386~helicase activity,GO:0005524~ATP binding,GO:0044822~poly(A) RNA binding,GO:0046872~metal ion binding,	IPR000571:Zinc finger, CCCH-type,IPR001650:Helicase, C-terminal,IPR011545:DNA/RNA helicase, DEAD/DEAH box type, N-terminal,IPR014001:Helicase, superfamily 1/2, ATP-binding domain,IPR027417:P-loop containing nucleoside triphosphate hydrolase,			SM00356:ZnF_C3H1,SM00487:DEXDc,SM00490:HELICc,	ATP-binding,Complete proteome,DNA-binding,Helicase,Hydrolase,Metal-binding,Nucleotide-binding,Reference proteome,Repeat,RNA-binding,Zinc,Zinc-finger,	chain:Zinc finger CCCH domain-containing protein 31,compositionally biased region:Poly-Ser,domain:Helicase ATP-binding,domain:Helicase C-terminal,nucleotide phosphate-binding region:ATP,short sequence motif:DEAH box,zinc finger region:C3H1-type 1,zinc finger region:C3H1-type 2,
NODE_649554_length_1145_cov_5.463756	NP_182290	48.837	6.47e-31	46.6	zinc finger (CCCH type) helicase family protein(AT2G47680)	Arabidopsis thaliana	General function prediction only,	GO:0006139~nucleobase-containing compound metabolic process,GO:0006396~RNA processing,	GO:0005634~nucleus,GO:0005737~cytoplasm,GO:0009507~chloroplast,	GO:0003676~nucleic acid binding,GO:0003677~DNA binding,GO:0003729~mRNA binding,GO:0004004~ATP-dependent RNA helicase activity,GO:0004386~helicase activity,GO:0005524~ATP binding,GO:0044822~poly(A) RNA binding,GO:0046872~metal ion binding,	IPR000571:Zinc finger, CCCH-type,IPR001650:Helicase, C-terminal,IPR011545:DNA/RNA helicase, DEAD/DEAH box type, N-terminal,IPR014001:Helicase, superfamily 1/2, ATP-binding domain,IPR027417:P-loop containing nucleoside triphosphate hydrolase,			SM00356:ZnF_C3H1,SM00487:DEXDc,SM00490:HELICc,	ATP-binding,Complete proteome,DNA-binding,Helicase,Hydrolase,Metal-binding,Nucleotide-binding,Reference proteome,Repeat,RNA-binding,Zinc,Zinc-finger,	chain:Zinc finger CCCH domain-containing protein 31,compositionally biased region:Poly-Ser,domain:Helicase ATP-binding,domain:Helicase C-terminal,nucleotide phosphate-binding region:ATP,short sequence motif:DEAH box,zinc finger region:C3H1-type 1,zinc finger region:C3H1-type 2,
NODE_656782_length_1211_cov_4.601156	NP_182290	58.333	6.29e-15	78.6	zinc finger (CCCH type) helicase family protein(AT2G47680)	Arabidopsis thaliana	General function prediction only,	GO:0006139~nucleobase-containing compound metabolic process,GO:0006396~RNA processing,	GO:0005634~nucleus,GO:0005737~cytoplasm,GO:0009507~chloroplast,	GO:0003676~nucleic acid binding,GO:0003677~DNA binding,GO:0003729~mRNA binding,GO:0004004~ATP-dependent RNA helicase activity,GO:0004386~helicase activity,GO:0005524~ATP binding,GO:0044822~poly(A) RNA binding,GO:0046872~metal ion binding,	IPR000571:Zinc finger, CCCH-type,IPR001650:Helicase, C-terminal,IPR011545:DNA/RNA helicase, DEAD/DEAH box type, N-terminal,IPR014001:Helicase, superfamily 1/2, ATP-binding domain,IPR027417:P-loop containing nucleoside triphosphate hydrolase,			SM00356:ZnF_C3H1,SM00487:DEXDc,SM00490:HELICc,	ATP-binding,Complete proteome,DNA-binding,Helicase,Hydrolase,Metal-binding,Nucleotide-binding,Reference proteome,Repeat,RNA-binding,Zinc,Zinc-finger,	chain:Zinc finger CCCH domain-containing protein 31,compositionally biased region:Poly-Ser,domain:Helicase ATP-binding,domain:Helicase C-terminal,nucleotide phosphate-binding region:ATP,short sequence motif:DEAH box,zinc finger region:C3H1-type 1,zinc finger region:C3H1-type 2,
NODE_215376_length_2373_cov_5.232617	NP_001238168	67.227	9.71e-40	145	PR1a precursor(PR1A)	Glycine max			GO:0005576~extracellular region,		IPR001283:Allergen V5/Tpx-1-related,IPR014044:CAP domain,IPR018244:Allergen V5/Tpx-1-related, conserved site,	gmx04075:Plant hormone signal transduction,gmx04626:Plant-pathogen interaction,		SM00198:SCP,	Signal,
NODE_215503_length_2886_cov_5.308385	NP_188819	40.909	1.65e-16	85.1	histone-lysine N-methyltransferase ATXR2(ATXR2)	Arabidopsis thaliana			GO:0005634~nucleus,	GO:0018024~histone-lysine N-methyltransferase activity,GO:0046872~metal ion binding,	IPR001214:SET domain,IPR002893:Zinc finger, MYND-type,			SM00317:SET,	Chromatin regulator,Complete proteome,Metal-binding,Methyltransferase,Nucleus,Reference proteome,S-adenosyl-L-methionine,Transferase,Zinc,Zinc-finger,	chain:Histone-lysine N-methyltransferase ATXR2,domain:SET,zinc finger region:MYND-type; degenerate,
NODE_215838_length_1571_cov_4.811585	NP_001141318	62.5	2.22e-10	45.4	uncharacterized LOC100273409(pco071849)	Zea mays				GO:0004842~ubiquitin-protein transferase activity,GO:0008270~zinc ion binding,	IPR001841:Zinc finger, RING-type,IPR001876:Zinc finger, RanBP2-type,IPR002867:Zinc finger, C6HC-type,IPR013083:Zinc finger, RING/FYVE/PHD-type,			SM00547:ZnF_RBZ,SM00647:IBR,	Complete proteome,Metal-binding,Reference proteome,Zinc,Zinc-finger,
NODE_216604_length_4011_cov_4.877337	NP_001182780	66.667	7.32e-24	105	retinol dehydrogenase 11(LOC100500950)	Zea mays					IPR002347:Glucose/ribitol dehydrogenase,IPR016040:NAD(P)-binding domain,				Complete proteome,Reference proteome,
NODE_422252_length_2983_cov_4.949045	NP_001182780	59.091	2.1e-07	55.5	retinol dehydrogenase 11(LOC100500950)	Zea mays					IPR002347:Glucose/ribitol dehydrogenase,IPR016040:NAD(P)-binding domain,				Complete proteome,Reference proteome,
NODE_444851_length_2055_cov_5.212165	NP_001182780	75	3.05e-09	55.5	retinol dehydrogenase 11(LOC100500950)	Zea mays					IPR002347:Glucose/ribitol dehydrogenase,IPR016040:NAD(P)-binding domain,				Complete proteome,Reference proteome,
NODE_217125_length_1800_cov_4.391667	NP_197608	64.179	2.54e-21	94	Leucine-rich repeat (LRR) family protein(AT5G21090)	Arabidopsis thaliana	Function unknown,	GO:0007165~signal transduction,	GO:0005886~plasma membrane,	GO:0019199~transmembrane receptor protein kinase activity,	IPR001611:Leucine-rich repeat,IPR013210:Leucine-rich repeat-containing N-terminal, type 2,				Complete proteome,Leucine-rich repeat,Reference proteome,Repeat,Signal,
NODE_217328_length_2046_cov_5.493646	NP_001302579	87.5	8.63e-40	106	thiosulfate/3-mercaptopyruvate sulfurtransferase 1, mitochondrial-like(LOC106406683)	Brassica napus				GO:0004792~thiosulfate sulfurtransferase activity,	IPR001307:Thiosulphate sulfurtransferase, conserved site,IPR001763:Rhodanese-like domain,			SM00450:RHOD,	Pyruvate,Transferase,
NODE_217535_length_1453_cov_4.653820	NP_001151569	60.87	2.89e-10	63.9	ATP binding protein(LOC100285203)	Zea mays				GO:0004672~protein kinase activity,GO:0005524~ATP binding,GO:0016597~amino acid binding,	IPR000719:Protein kinase, catalytic domain,IPR001245:Serine-threonine/tyrosine-protein kinase catalytic domain,IPR002912:ACT domain,IPR008271:Serine/threonine-protein kinase, active site,IPR011009:Protein kinase-like domain,			SM00220:S_TKc,	Complete proteome,Reference proteome,
NODE_217535_length_1453_cov_4.653820	NP_001141661	57.447	1.43e-09	61.6	putative ACT-domain containing protein kinase family protein(LOC100273787)	Zea mays				GO:0004672~protein kinase activity,GO:0005524~ATP binding,GO:0016597~amino acid binding,	IPR000719:Protein kinase, catalytic domain,IPR001245:Serine-threonine/tyrosine-protein kinase catalytic domain,IPR002912:ACT domain,IPR008271:Serine/threonine-protein kinase, active site,IPR011009:Protein kinase-like domain,			SM00220:S_TKc,	Complete proteome,Kinase,Reference proteome,Transferase,
NODE_21811_length_1058_cov_4.119092	NP_001237678	54.348	1.46e-06	50.1	uncharacterized LOC100306109(LOC100306109)	Glycine max			GO:0016021~integral component of membrane,	GO:0008270~zinc ion binding,	IPR001841:Zinc finger, RING-type,IPR013083:Zinc finger, RING/FYVE/PHD-type,IPR027367:YMGG-like Gly-zipper,			SM00184:RING,	Complete proteome,Membrane,Reference proteome,Transmembrane,Transmembrane helix,
NODE_2186_length_2255_cov_4.710421	NP_200530	75	1.59e-11	52	ENTH/ANTH/VHS superfamily protein(AT5G57200)	Arabidopsis thaliana		GO:0006897~endocytosis,GO:0048268~clathrin coat assembly,	GO:0005634~nucleus,GO:0005794~Golgi apparatus,GO:0005905~clathrin-coated pit,GO:0030136~clathrin-coated vesicle,	GO:0005545~1-phosphatidylinositol binding,GO:0030276~clathrin binding,	IPR008942:ENTH/VHS,IPR011417:AP180 N-terminal homology (ANTH) domain,IPR013809:Epsin-like, N-terminal,IPR014712:Clathrin adaptor, phosphoinositide-binding, GAT-like,			SM00273:ENTH,	Coated pit,Complete proteome,Cytoplasmic vesicle,Endocytosis,Golgi apparatus,Membrane,Reference proteome,	chain:Putative clathrin assembly protein At5g57200,compositionally biased region:Glu-rich,domain:ENTH,
NODE_218940_length_1862_cov_5.353384	NP_001140500	37.5	2.76e-13	74.7	putative protein kinase superfamily protein(LOC100272561)	Zea mays		GO:0006950~response to stress,		GO:0004672~protein kinase activity,GO:0005524~ATP binding,	IPR000719:Protein kinase, catalytic domain,IPR006016:UspA,IPR008271:Serine/threonine-protein kinase, active site,IPR011009:Protein kinase-like domain,IPR013320:Concanavalin A-like lectin/glucanase, subgroup,IPR014729:Rossmann-like alpha/beta/alpha sandwich fold,			SM00220:S_TKc,	Coiled coil,Complete proteome,Reference proteome,
NODE_966912_length_1053_cov_4.412156	NP_001140500	74.783	2.38e-127	381	putative protein kinase superfamily protein(LOC100272561)	Zea mays		GO:0006950~response to stress,		GO:0004672~protein kinase activity,GO:0005524~ATP binding,	IPR000719:Protein kinase, catalytic domain,IPR006016:UspA,IPR008271:Serine/threonine-protein kinase, active site,IPR011009:Protein kinase-like domain,IPR013320:Concanavalin A-like lectin/glucanase, subgroup,IPR014729:Rossmann-like alpha/beta/alpha sandwich fold,			SM00220:S_TKc,	Coiled coil,Complete proteome,Reference proteome,
NODE_218969_length_1059_cov_4.666667	NP_188469	76.364	2.34e-22	97.4	NAC domain containing protein 58(NAC058)	Arabidopsis thaliana		GO:0006351~transcription, DNA-templated,GO:0006355~regulation of transcription, DNA-templated,GO:0007275~multicellular organism development,	GO:0005634~nucleus,	GO:0003677~DNA binding,GO:0003700~transcription factor activity, sequence-specific DNA binding,	IPR003441:No apical meristem (NAM) protein,				Complete proteome,DNA-binding,Nucleus,Reference proteome,Transcription,Transcription regulation,
NODE_219001_length_2685_cov_4.737803	NP_001241549	77.143	8.23e-08	56.6	protein farnesyltransferase/geranylgeranyltransferase type-1 subunit alpha-like(LOC100811502)	Glycine max		GO:0018342~protein prenylation,GO:0018343~protein farnesylation,GO:0018344~protein geranylgeranylation,	GO:0005953~CAAX-protein geranylgeranyltransferase complex,GO:0005965~protein farnesyltransferase complex,	GO:0008318~protein prenyltransferase activity,	IPR002088:Protein prenyltransferase, alpha subunit,	gmx00900:Terpenoid backbone biosynthesis,gmx01130:Biosynthesis of antibiotics,			Complete proteome,Reference proteome,
NODE_219001_length_2685_cov_4.737803	NP_001240249	77.143	1.02e-07	56.2	protein farnesyltransferase/geranylgeranyltransferase type-1 subunit alpha-like(LOC100790130)	Glycine max		GO:0018343~protein farnesylation,GO:0018344~protein geranylgeranylation,	GO:0005953~CAAX-protein geranylgeranyltransferase complex,GO:0005965~protein farnesyltransferase complex,	GO:0008318~protein prenyltransferase activity,	IPR002088:Protein prenyltransferase, alpha subunit,	gmx00900:Terpenoid backbone biosynthesis,gmx01130:Biosynthesis of antibiotics,			Complete proteome,Reference proteome,
NODE_219048_length_1552_cov_4.547036	NP_001307719	37.872	8.1e-60	211	L-type lectin-domain containing receptor kinase IX.1-like(LOC101244817)	Solanum lycopersicum			GO:0016021~integral component of membrane,	GO:0004672~protein kinase activity,GO:0005524~ATP binding,GO:0030246~carbohydrate binding,	IPR000719:Protein kinase, catalytic domain,IPR000985:Legume lectin, alpha chain, conserved site,IPR001220:Legume lectin domain,IPR008271:Serine/threonine-protein kinase, active site,IPR011009:Protein kinase-like domain,IPR013320:Concanavalin A-like lectin/glucanase, subgroup,IPR017441:Protein kinase, ATP binding site,IPR019825:Legume lectin, beta chain, Mn/Ca-binding site,			SM00220:S_TKc,	Complete proteome,Kinase,Lectin,Membrane,Receptor,Reference proteome,Signal,Transferase,Transmembrane,Transmembrane helix,
NODE_80021_length_1159_cov_4.886109	NP_001307719	31.88	5.6e-28	117	L-type lectin-domain containing receptor kinase IX.1-like(LOC101244817)	Solanum lycopersicum			GO:0016021~integral component of membrane,	GO:0004672~protein kinase activity,GO:0005524~ATP binding,GO:0030246~carbohydrate binding,	IPR000719:Protein kinase, catalytic domain,IPR000985:Legume lectin, alpha chain, conserved site,IPR001220:Legume lectin domain,IPR008271:Serine/threonine-protein kinase, active site,IPR011009:Protein kinase-like domain,IPR013320:Concanavalin A-like lectin/glucanase, subgroup,IPR017441:Protein kinase, ATP binding site,IPR019825:Legume lectin, beta chain, Mn/Ca-binding site,			SM00220:S_TKc,	Complete proteome,Kinase,Lectin,Membrane,Receptor,Reference proteome,Signal,Transferase,Transmembrane,Transmembrane helix,
NODE_219958_length_1040_cov_3.894231	NP_564288	51.562	5.51e-13	71.2	Glycosyl hydrolase family 47 protein(AT1G27520)	Arabidopsis thaliana		GO:0006487~protein N-linked glycosylation,GO:0006491~N-glycan processing,GO:0030433~ER-associated ubiquitin-dependent protein catabolic process,GO:0030968~endoplasmic reticulum unfolded protein response,GO:0097466~glycoprotein ERAD pathway,	GO:0005783~endoplasmic reticulum,GO:0005789~endoplasmic reticulum membrane,GO:0016021~integral component of membrane,	GO:0004559~alpha-mannosidase activity,GO:0004571~mannosyl-oligosaccharide 1,2-alpha-mannosidase activity,GO:0005509~calcium ion binding,	IPR001382:Glycoside hydrolase, family 47,	ath04141:Protein processing in endoplasmic reticulum,			Complete proteome,Endoplasmic reticulum,Glycoprotein,Hydrolase,Membrane,Metal-binding,Reference proteome,Signal-anchor,Transmembrane,Transmembrane helix,
NODE_221074_length_3016_cov_5.361074	NP_001169528	52	7.25e-06	51.6	uncharacterized LOC100383402(LOC100383402)	Zea mays		GO:0006281~DNA repair,		GO:0003677~DNA binding,GO:0004518~nuclease activity,	IPR006084:XPG/Rad2 endonuclease,IPR006085:XPG N-terminal,IPR006086:XPG-I domain,IPR020045:5'-3' exonuclease, C-terminal domain,			SM00484:XPGI,SM00485:XPGN,	Complete proteome,Reference proteome,
NODE_222510_length_2030_cov_5.031034	NP_001316959	78.824	6.42e-38	152	sucrose synthase-like(LOC108466051)	Gossypium arboreum		GO:0005985~sucrose metabolic process,		GO:0016157~sucrose synthase activity,	IPR000368:Sucrose synthase,IPR001296:Glycosyl transferase, family 1,IPR012820:Sucrose synthase, plant/cyanobacteria,				Complete proteome,Glycosyltransferase,Reference proteome,Transferase,
NODE_222778_length_2635_cov_4.914990	NP_179888	47.766	1.7e-75	254	Acyl-CoA N-acyltransferases (NAT) superfamily protein(AT2G23060)	Arabidopsis thaliana		GO:0006474~N-terminal protein amino acid acetylation,	GO:0031248~protein acetyltransferase complex,	GO:0004596~peptide alpha-N-acetyltransferase activity,GO:0008080~N-acetyltransferase activity,	IPR000182:GNAT domain,IPR016181:Acyl-CoA N-acyltransferase,				Acyltransferase,Alternative splicing,Complete proteome,Reference proteome,Transferase,
NODE_223335_length_1375_cov_4.872727	NP_566720	85.567	7.32e-45	166	Pyruvate kinase family protein(PKP-ALPHA)	Arabidopsis thaliana		GO:0006096~glycolytic process,GO:0006629~lipid metabolic process,GO:0010431~seed maturation,GO:0046686~response to cadmium ion,	GO:0005829~cytosol,GO:0009507~chloroplast,GO:0009570~chloroplast stroma,	GO:0000287~magnesium ion binding,GO:0004743~pyruvate kinase activity,GO:0005524~ATP binding,GO:0016301~kinase activity,GO:0030955~potassium ion binding,	IPR001697:Pyruvate kinase,IPR011037:Pyruvate kinase-like, insert domain,IPR015793:Pyruvate kinase, barrel,IPR015794:Pyruvate kinase, alpha/beta,IPR015795:Pyruvate kinase, C-terminal,IPR015806:Pyruvate kinase, beta-barrel insert domain,IPR015813:Pyruvate/Phosphoenolpyruvate kinase-like domain,IPR018209:Pyruvate kinase, active site,	ath00010:Glycolysis / Gluconeogenesis,ath00230:Purine metabolism,ath00620:Pyruvate metabolism,ath01100:Metabolic pathways,ath01110:Biosynthesis of secondary metabolites,ath01130:Biosynthesis of antibiotics,ath01200:Carbon metabolism,ath01230:Biosynthesis of amino acids,			ATP-binding,Chloroplast,Complete proteome,Glycolysis,Kinase,Magnesium,Metal-binding,Nucleotide-binding,Plastid,Potassium,Pyruvate,Reference proteome,Transferase,Transit peptide,
NODE_224848_length_1990_cov_4.867337	NP_001190659	32.407	6.81e-07	52.8	Myb/SANT-like DNA-binding domain protein(AT4G02550)	Arabidopsis thaliana		GO:0031347~regulation of defense response,	GO:0005634~nucleus,		IPR024752:Myb/SANT-like domain,				Complete proteome,Reference proteome,
NODE_22512_length_2760_cov_4.499275	NP_182059	63.793	3.72e-37	150	Leucine-rich repeat protein kinase family protein(AT2G45340)	Arabidopsis thaliana	Function unknown,	GO:0006468~protein phosphorylation,GO:0007169~transmembrane receptor protein tyrosine kinase signaling pathway,	GO:0005886~plasma membrane,GO:0016021~integral component of membrane,	GO:0004672~protein kinase activity,GO:0004674~protein serine/threonine kinase activity,GO:0005524~ATP binding,	IPR000719:Protein kinase, catalytic domain,IPR001245:Serine-threonine/tyrosine-protein kinase catalytic domain,IPR001611:Leucine-rich repeat,IPR011009:Protein kinase-like domain,IPR013210:Leucine-rich repeat-containing N-terminal, type 2,IPR013320:Concanavalin A-like lectin/glucanase, subgroup,				Complete proteome,Kinase,Leucine-rich repeat,Membrane,Receptor,Reference proteome,Repeat,Signal,Transferase,Transmembrane,Transmembrane helix,
NODE_225379_length_2131_cov_4.578601	NP_566338	85.124	5.74e-50	184	LMBR1-like membrane protein(AT3G08930)	Arabidopsis thaliana			GO:0005576~extracellular region,GO:0009506~plasmodesma,GO:0016021~integral component of membrane,		IPR006876:LMBR1-like membrane protein,				Coiled coil,Complete proteome,Membrane,Reference proteome,Transmembrane,Transmembrane helix,	chain:LIMR family protein At3g08930,transmembrane region,
NODE_345381_length_2583_cov_4.855981	NP_566338	51.748	1.81e-30	128	LMBR1-like membrane protein(AT3G08930)	Arabidopsis thaliana			GO:0005576~extracellular region,GO:0009506~plasmodesma,GO:0016021~integral component of membrane,		IPR006876:LMBR1-like membrane protein,				Coiled coil,Complete proteome,Membrane,Reference proteome,Transmembrane,Transmembrane helix,	chain:LIMR family protein At3g08930,transmembrane region,
NODE_226590_length_2832_cov_4.484110	NP_001235798	70.37	1.29e-21	93.2	uncharacterized LOC100500027(LOC100500027)	Glycine max		GO:0006614~SRP-dependent cotranslational protein targeting to membrane,	GO:0048500~signal recognition particle,	GO:0008312~7S RNA binding,	IPR002778:Signal recognition particle, SRP19 subunit,	gmx03060:Protein export,			Complete proteome,Reference proteome,
NODE_226774_length_3334_cov_4.724055	NP_001306740	35.849	1.47e-06	53.9	ferric reduction oxidase 2-like(LOC103958225)	Pyrus x bretschneideri			GO:0016021~integral component of membrane,	GO:0016491~oxidoreductase activity,	IPR013112:FAD-binding 8,IPR013121:Ferric reductase, NAD binding,IPR013130:Ferric reductase transmembrane component-like domain,IPR017927:Ferredoxin reductase-type FAD-binding domain,IPR017938:Riboflavin synthase-like beta-barrel,				Membrane,Oxidoreductase,Transmembrane,Transmembrane helix,
NODE_391335_length_1377_cov_4.736383	NP_001306740	66.667	1.23e-12	71.6	ferric reduction oxidase 2-like(LOC103958225)	Pyrus x bretschneideri			GO:0016021~integral component of membrane,	GO:0016491~oxidoreductase activity,	IPR013112:FAD-binding 8,IPR013121:Ferric reductase, NAD binding,IPR013130:Ferric reductase transmembrane component-like domain,IPR017927:Ferredoxin reductase-type FAD-binding domain,IPR017938:Riboflavin synthase-like beta-barrel,				Membrane,Oxidoreductase,Transmembrane,Transmembrane helix,
NODE_228133_length_1416_cov_4.646186	NP_199060	49.275	1.71e-61	210	Pentatricopeptide repeat (PPR) superfamily protein(AT5G42450)	Arabidopsis thaliana			GO:0005739~mitochondrion,		IPR002885:Pentatricopeptide repeat,IPR011990:Tetratricopeptide-like helical,				Complete proteome,Mitochondrion,Reference proteome,Repeat,Transit peptide,	chain:Pentatricopeptide repeat-containing protein At5g42450, mitochondrial,region of interest:Type E motif,region of interest:Type E(+) motif,repeat:PPR 1,repeat:PPR 2,repeat:PPR 3,repeat:PPR 4,repeat:PPR 5,repeat:PPR 6,repeat:PPR 7,repeat:PPR 8,repeat:PPR 9,sequence conflict,transit peptide:Mitochondrion,
NODE_228133_length_1416_cov_4.646186	NP_197188	36	8.96e-37	145	Tetratricopeptide repeat (TPR)-like superfamily protein(AT5G16860)	Arabidopsis thaliana			GO:0005739~mitochondrion,	GO:0008270~zinc ion binding,	IPR002885:Pentatricopeptide repeat,IPR011990:Tetratricopeptide-like helical,				Complete proteome,Reference proteome,Repeat,	chain:Pentatricopeptide repeat-containing protein At5g16860,region of interest:Type DYW motif,region of interest:Type E motif,region of interest:Type E(+) motif,repeat:PPR 1,repeat:PPR 10,repeat:PPR 11,repeat:PPR 12,repeat:PPR 13,repeat:PPR 14,repeat:PPR 15,repeat:PPR 16,repeat:PPR 17,repeat:PPR 2,repeat:PPR 3,repeat:PPR 4,repeat:PPR 5,repeat:PPR 6,repeat:PPR 7,repeat:PPR 8,repeat:PPR 9,
NODE_228492_length_4063_cov_5.199606	NP_566559	35.294	5.76e-18	90.9	pumilio 24(PUM24)	Arabidopsis thaliana	Translation, ribosomal structure and biogenesis,	GO:0006417~regulation of translation,	GO:0005634~nucleus,GO:0005730~nucleolus,GO:0005829~cytosol,	GO:0003723~RNA binding,GO:0003729~mRNA binding,	IPR001313:Pumilio RNA-binding repeat,IPR011989:Armadillo-like helical,IPR012959:CPL,IPR016024:Armadillo-type fold,			SM00025:Pumilio,	Complete proteome,Nucleus,Reference proteome,Repeat,RNA-binding,Translation regulation,
NODE_228492_length_4063_cov_5.199606	NP_566559	30.256	1.49e-12	73.6	pumilio 24(PUM24)	Arabidopsis thaliana	Translation, ribosomal structure and biogenesis,	GO:0006417~regulation of translation,	GO:0005634~nucleus,GO:0005730~nucleolus,GO:0005829~cytosol,	GO:0003723~RNA binding,GO:0003729~mRNA binding,	IPR001313:Pumilio RNA-binding repeat,IPR011989:Armadillo-like helical,IPR012959:CPL,IPR016024:Armadillo-type fold,			SM00025:Pumilio,	Complete proteome,Nucleus,Reference proteome,Repeat,RNA-binding,Translation regulation,
NODE_228688_length_1091_cov_4.816682	NP_001130080	49.091	1.01e-09	60.8	uncharacterized LOC100191173(LOC100191173)	Zea mays			GO:0016021~integral component of membrane,	GO:0008375~acetylglucosaminyltransferase activity,	IPR003406:Glycosyl transferase, family 14,				Complete proteome,Membrane,Reference proteome,Transmembrane,Transmembrane helix,
NODE_229225_length_2723_cov_5.323540	NP_195948	61.111	5.44e-20	97.4	NRAMP metal ion transporter family protein(EIN2)	Arabidopsis thaliana		GO:0001736~establishment of planar polarity,GO:0001944~vasculature development,GO:0002237~response to molecule of bacterial origin,GO:0006970~response to osmotic stress,GO:0006979~response to oxidative stress,GO:0008219~cell death,GO:0009408~response to heat,GO:0009651~response to salt stress,GO:0009723~response to ethylene,GO:0009725~response to hormone,GO:0009734~auxin-activated signaling pathw…	GO:0005634~nucleus,GO:0005789~endoplasmic reticulum membrane,GO:0005886~plasma membrane,GO:0016021~integral component of membrane,	GO:0003729~mRNA binding,GO:0005215~transporter activity,	IPR001046:Natural resistance-associated macrophage like,IPR017187:Ethylene-insensitive protein 2,	ath04075:Plant hormone signal transduction,	PIRSF037378:ethylene signal transduction protein EIN2,		Auxin signaling pathway,Complete proteome,Cytokinin signaling pathway,Cytoplasm,Endoplasmic reticulum,Ethylene signaling pathway,Membrane,Nucleus,Phosphoprotein,Plant defense,Reference proteome,Transmembrane,Transmembrane helix,	chain:Ethylene-insensitive protein 2,mutagenesis site,topological domain:Cytoplasmic,topological domain:Extracellular,transmembrane region,
NODE_229225_length_2723_cov_5.323540	NP_001234518	52.874	2.07e-19	95.9	ethylene signaling protein(EIN2)	Solanum lycopersicum		GO:0009873~ethylene-activated signaling pathway,	GO:0005622~intracellular,GO:0016021~integral component of membrane,	GO:0005215~transporter activity,	IPR001046:Natural resistance-associated macrophage like,IPR017187:Ethylene-insensitive protein 2,	sly04075:Plant hormone signal transduction,	PIRSF037378:ethylene signal transduction protein EIN2,		Complete proteome,Membrane,Reference proteome,Transmembrane,Transmembrane helix,
NODE_229737_length_2663_cov_5.321066	NP_001152289	64.322	3.51e-82	276	glucan endo-1,3-beta-glucosidase 3(LOC100285928)	Zea mays		GO:0005975~carbohydrate metabolic process,		GO:0004553~hydrolase activity, hydrolyzing O-glycosyl compounds,	IPR000490:Glycoside hydrolase, family 17,IPR012946:X8,IPR013781:Glycoside hydrolase, catalytic domain,IPR017853:Glycoside hydrolase, superfamily,			SM00768:X8,	Glycosidase,Hydrolase,Signal,
NODE_230404_length_1799_cov_3.556420	NP_001316139	77.083	2.78e-18	78.6	adenine phosphoribosyltransferase 1(LOC101260722)	Solanum lycopersicum						sly00230:Purine metabolism,sly01100:Metabolic pathways,
NODE_231435_length_1103_cov_5.565730	NP_001314218	75.926	7.96e-18	85.1	thiamine thiazole synthase, chloroplastic-like(LOC107928645)	Gossypium hirsutum		GO:0006950~response to stress,GO:0009228~thiamine biosynthetic process,GO:0052837~thiazole biosynthetic process,	GO:0005829~cytosol,GO:0009570~chloroplast stroma,	GO:0016491~oxidoreductase activity,GO:0046872~metal ion binding,	IPR002922:Thiazole biosynthetic enzyme Thi4 family,IPR023753:Pyridine nucleotide-disulphide oxidoreductase, FAD/NAD(P)-binding domain,IPR027495:Thiamine thiazole synthase,				Chloroplast,Iron,Metal-binding,NAD,Plastid,Thiamine biosynthesis,Transit peptide,
NODE_232517_length_1771_cov_4.544890	NP_001311749	80.303	5.52e-33	128	GATA transcription factor 4-like(LOC107763982)	Nicotiana tabacum		GO:0045893~positive regulation of transcription, DNA-templated,	GO:0005634~nucleus,	GO:0003700~transcription factor activity, sequence-specific DNA binding,GO:0008270~zinc ion binding,GO:0043565~sequence-specific DNA binding,	IPR000679:Zinc finger, GATA-type,IPR013088:Zinc finger, NHR/GATA-type,IPR016679:Transcription factor, GATA, plant,		PIRSF016992:GATA transcription factor, plant type,	SM00401:ZnF_GATA,
NODE_233609_length_1317_cov_4.827639	NP_001141830	58.042	2.74e-49	175	uncharacterized LOC100273971(LOC100273971)	Zea mays		GO:0046907~intracellular transport,	GO:0005643~nuclear pore,		IPR000156:Ran binding domain,IPR011993:Pleckstrin homology-like domain,IPR015007:Nuclear pore complex, NUP2/50/61,			SM00160:RanBD,	Complete proteome,Reference proteome,Signal,
NODE_23373_length_1211_cov_4.875309	NP_001306188	95.652	2.3e-07	53.9	ethylene-responsive transcription factor ESR1-like(LOC103452381)	Malus domestica		GO:0006351~transcription, DNA-templated,	GO:0005634~nucleus,	GO:0003677~DNA binding,GO:0003700~transcription factor activity, sequence-specific DNA binding,	IPR001471:AP2/ERF domain,IPR016177:DNA-binding, integrase-type,			SM00380:AP2,	DNA-binding,Nucleus,Transcription,Transcription regulation,
NODE_234087_length_974_cov_4.001027	NP_001319628	69.565	1.3e-63	204	hydroxyethylthiazole kinase family protein(AT3G24030)	Arabidopsis thaliana		GO:0009228~thiamine biosynthetic process,GO:0009229~thiamine diphosphate biosynthetic process,GO:0016310~phosphorylation,GO:0036172~thiamine salvage,		GO:0003824~catalytic activity,GO:0004417~hydroxyethylthiazole kinase activity,GO:0005524~ATP binding,GO:0046872~metal ion binding,	IPR000417:Hydroxyethylthiazole kinase,	ath00730:Thiamine metabolism,ath01100:Metabolic pathways,	PIRSF000513:hydroxyethylthiazole kinase,		ATP-binding,Complete proteome,Kinase,Magnesium,Metal-binding,Nucleotide-binding,Reference proteome,Thiamine biosynthesis,Transferase,
NODE_235492_length_2504_cov_5.204473	NP_193438	84.615	5.16e-07	53.9	ureidoglycine aminohydrolase(UGLYAH)	Arabidopsis thaliana		GO:0000256~allantoin catabolic process,GO:0006145~purine nucleobase catabolic process,GO:0006355~regulation of transcription, DNA-templated,GO:0010136~ureide catabolic process,	GO:0005783~endoplasmic reticulum,	GO:0003700~transcription factor activity, sequence-specific DNA binding,GO:0046872~metal ion binding,GO:0071522~ureidoglycine aminohydrolase activity,	IPR011051:RmlC-like cupin domain,IPR013096:Cupin 2, conserved barrel,IPR014710:RmlC-like jelly roll fold,	ath00230:Purine metabolism,			3D-structure,Complete proteome,Endoplasmic reticulum,Hydrolase,Manganese,Metal-binding,Purine metabolism,Reference proteome,Signal,
NODE_235492_length_2504_cov_5.204473	NP_193438	95.455	8.83e-12	48.1	ureidoglycine aminohydrolase(UGLYAH)	Arabidopsis thaliana		GO:0000256~allantoin catabolic process,GO:0006145~purine nucleobase catabolic process,GO:0006355~regulation of transcription, DNA-templated,GO:0010136~ureide catabolic process,	GO:0005783~endoplasmic reticulum,	GO:0003700~transcription factor activity, sequence-specific DNA binding,GO:0046872~metal ion binding,GO:0071522~ureidoglycine aminohydrolase activity,	IPR011051:RmlC-like cupin domain,IPR013096:Cupin 2, conserved barrel,IPR014710:RmlC-like jelly roll fold,	ath00230:Purine metabolism,			3D-structure,Complete proteome,Endoplasmic reticulum,Hydrolase,Manganese,Metal-binding,Purine metabolism,Reference proteome,Signal,
NODE_235650_length_1708_cov_4.214286	NP_196580	70.423	2.37e-27	90.5	slufate transporter 2;1(SULTR2;1)	Arabidopsis thaliana		GO:0008272~sulfate transport,GO:1902358~sulfate transmembrane transport,	GO:0005887~integral component of plasma membrane,	GO:0008271~secondary active sulfate transmembrane transporter activity,GO:0015116~sulfate transmembrane transporter activity,GO:0015293~symporter activity,	IPR001902:Sulphate anion transporter,IPR002645:STAS domain,IPR011547:Sulphate transporter,IPR018045:Sulphate anion transporter, conserved site,				Complete proteome,Glycoprotein,Membrane,Reference proteome,Sulfate transport,Symport,Transmembrane,Transmembrane helix,Transport,	chain:Sulfate transporter 2.1,domain:STAS,glycosylation site:N-linked (GlcNAc...),topological domain:Cytoplasmic,topological domain:Extracellular,transmembrane region,
NODE_235699_length_1519_cov_5.155365	NP_850630	37.427	1.62e-29	124	MUTS homolog 7(MSH7)	Arabidopsis thaliana		GO:0000710~meiotic mismatch repair,GO:0006298~mismatch repair,GO:0007131~reciprocal meiotic recombination,GO:0009411~response to UV,GO:0043570~maintenance of DNA repeat elements,GO:0045910~negative regulation of DNA recombination,	GO:0000228~nuclear chromosome,GO:0005634~nucleus,GO:0032301~MutSalpha complex,	GO:0000400~four-way junction DNA binding,GO:0003684~damaged DNA binding,GO:0005515~protein binding,GO:0005524~ATP binding,GO:0008094~DNA-dependent ATPase activity,GO:0032137~guanine/thymine mispair binding,GO:0032138~single base insertion or deletion binding,	IPR000432:DNA mismatch repair protein MutS, C-terminal,IPR007695:DNA mismatch repair protein MutS-like, N-terminal,IPR007696:DNA mismatch repair protein MutS, core,IPR007860:DNA mismatch repair protein MutS, connector domain,IPR016151:DNA mismatch repair protein MutS, N-terminal,IPR027417:P-loop containing nucleoside triphosphate hydrolase,	ath03430:Mismatch repair,		SM00533:MUTSd,SM00534:MUTSac,	ATP-binding,Complete proteome,DNA damage,DNA repair,DNA-binding,Nucleotide-binding,Nucleus,Reference proteome,	chain:DNA mismatch repair protein Msh6-2,nucleotide phosphate-binding region:ATP,sequence conflict,
NODE_236167_length_1380_cov_5.190580	NP_179488	45.312	2.63e-12	61.2	Peroxidase superfamily protein(AT2G18980)	Arabidopsis thaliana		GO:0006979~response to oxidative stress,GO:0042744~hydrogen peroxide catabolic process,GO:0055114~oxidation-reduction process,	GO:0005576~extracellular region,	GO:0004601~peroxidase activity,GO:0020037~heme binding,GO:0046872~metal ion binding,	IPR000823:Plant peroxidase,IPR002016:Haem peroxidase, plant/fungal/bacterial,IPR010255:Haem peroxidase,IPR019793:Peroxidases heam-ligand binding site,IPR019794:Peroxidase, active site,	ath00940:Phenylpropanoid biosynthesis,ath01100:Metabolic pathways,ath01110:Biosynthesis of secondary metabolites,			Calcium,Complete proteome,Disulfide bond,Heme,Hydrogen peroxide,Iron,Metal-binding,Oxidoreductase,Peroxidase,Reference proteome,Secreted,Signal,	active site:Proton acceptor,binding site:Substrate; via carbonyl oxygen,chain:Peroxidase 16,disulfide bond,metal ion-binding site:Calcium 1,metal ion-binding site:Calcium 1; via carbonyl oxygen,metal ion-binding site:Calcium 2,metal ion-binding site:Iron (heme axial ligand),modified residue,signal peptide,site:Transition state stabilizer,
NODE_236339_length_1039_cov_3.950914	NP_001313038	68.627	4.85e-20	79.3	pyruvate kinase isozyme G, chloroplastic(LOC107822892)	Nicotiana tabacum			GO:0009507~chloroplast,	GO:0000287~magnesium ion binding,GO:0004743~pyruvate kinase activity,GO:0005524~ATP binding,GO:0016301~kinase activity,GO:0030955~potassium ion binding,	IPR001697:Pyruvate kinase,IPR011037:Pyruvate kinase-like, insert domain,IPR015793:Pyruvate kinase, barrel,IPR015794:Pyruvate kinase, alpha/beta,IPR015795:Pyruvate kinase, C-terminal,IPR015806:Pyruvate kinase, beta-barrel insert domain,IPR015813:Pyruvate/Phosphoenolpyruvate kinase-like domain,IPR018209:Pyruvate kinase, active site,				ATP-binding,Chloroplast,Glycolysis,Kinase,Magnesium,Metal-binding,Nucleotide-binding,Plastid,Potassium,Pyruvate,Transferase,Transit peptide,
NODE_5906_length_1561_cov_4.848815	NP_001313038	79.412	5.31e-08	57	pyruvate kinase isozyme G, chloroplastic(LOC107822892)	Nicotiana tabacum			GO:0009507~chloroplast,	GO:0000287~magnesium ion binding,GO:0004743~pyruvate kinase activity,GO:0005524~ATP binding,GO:0016301~kinase activity,GO:0030955~potassium ion binding,	IPR001697:Pyruvate kinase,IPR011037:Pyruvate kinase-like, insert domain,IPR015793:Pyruvate kinase, barrel,IPR015794:Pyruvate kinase, alpha/beta,IPR015795:Pyruvate kinase, C-terminal,IPR015806:Pyruvate kinase, beta-barrel insert domain,IPR015813:Pyruvate/Phosphoenolpyruvate kinase-like domain,IPR018209:Pyruvate kinase, active site,				ATP-binding,Chloroplast,Glycolysis,Kinase,Magnesium,Metal-binding,Nucleotide-binding,Plastid,Potassium,Pyruvate,Transferase,Transit peptide,
NODE_236475_length_1345_cov_5.081041	NP_001275160	77.419	1.38e-08	57.8	ribosome production factor 1-like(LOC102599817)	Solanum tuberosum					IPR004154:Anticodon-binding,IPR007109:Brix domain,			SM00879:SM00879,
NODE_23669_length_1612_cov_4.038462	NP_001242338	79.07	6.88e-15	77.4	cyclin-T1-4-like(LOC100797811)	Glycine max		GO:0045737~positive regulation of cyclin-dependent protein serine/threonine kinase activity,GO:0045944~positive regulation of transcription from RNA polymerase II promoter,GO:1901409~positive regulation of phosphorylation of RNA polymerase II C-terminal domain,	GO:0000307~cyclin-dependent protein kinase holoenzyme complex,GO:0005634~nucleus,	GO:0016538~cyclin-dependent protein serine/threonine kinase regulator activity,	IPR006671:Cyclin, N-terminal,IPR013763:Cyclin-like,			SM00385:CYCLIN,	Complete proteome,Cyclin,Reference proteome,
NODE_528856_length_1124_cov_3.548043	NP_001242338	78.571	2.73e-07	53.1	cyclin-T1-4-like(LOC100797811)	Glycine max		GO:0045737~positive regulation of cyclin-dependent protein serine/threonine kinase activity,GO:0045944~positive regulation of transcription from RNA polymerase II promoter,GO:1901409~positive regulation of phosphorylation of RNA polymerase II C-terminal domain,	GO:0000307~cyclin-dependent protein kinase holoenzyme complex,GO:0005634~nucleus,	GO:0016538~cyclin-dependent protein serine/threonine kinase regulator activity,	IPR006671:Cyclin, N-terminal,IPR013763:Cyclin-like,			SM00385:CYCLIN,	Complete proteome,Cyclin,Reference proteome,
NODE_238563_length_3375_cov_5.376593	NP_001159170	70.149	3.26e-23	106	uncharacterized LOC100304255(LOC100304255)	Zea mays			GO:0016021~integral component of membrane,	GO:0008270~zinc ion binding,	IPR011016:Zinc finger, RING-CH-type,IPR013083:Zinc finger, RING/FYVE/PHD-type,			SM00744:RINGv,	Complete proteome,Membrane,Metal-binding,Reference proteome,Transmembrane,Transmembrane helix,Zinc,Zinc-finger,
NODE_484933_length_1559_cov_5.011546	NP_001159170	84.375	1.39e-09	62	uncharacterized LOC100304255(LOC100304255)	Zea mays			GO:0016021~integral component of membrane,	GO:0008270~zinc ion binding,	IPR011016:Zinc finger, RING-CH-type,IPR013083:Zinc finger, RING/FYVE/PHD-type,			SM00744:RINGv,	Complete proteome,Membrane,Metal-binding,Reference proteome,Transmembrane,Transmembrane helix,Zinc,Zinc-finger,
NODE_484933_length_1559_cov_5.011546	NP_001159170	78.571	1.02e-07	55.8	uncharacterized LOC100304255(LOC100304255)	Zea mays			GO:0016021~integral component of membrane,	GO:0008270~zinc ion binding,	IPR011016:Zinc finger, RING-CH-type,IPR013083:Zinc finger, RING/FYVE/PHD-type,			SM00744:RINGv,	Complete proteome,Membrane,Metal-binding,Reference proteome,Transmembrane,Transmembrane helix,Zinc,Zinc-finger,
NODE_484933_length_1559_cov_5.011546	NP_001159170	49.206	1.76e-07	55.1	uncharacterized LOC100304255(LOC100304255)	Zea mays			GO:0016021~integral component of membrane,	GO:0008270~zinc ion binding,	IPR011016:Zinc finger, RING-CH-type,IPR013083:Zinc finger, RING/FYVE/PHD-type,			SM00744:RINGv,	Complete proteome,Membrane,Metal-binding,Reference proteome,Transmembrane,Transmembrane helix,Zinc,Zinc-finger,
NODE_239009_length_1121_cov_5.054416	NP_198679	46.377	1.56e-10	59.3	cytochrome B561-1(CYB-1)	Arabidopsis thaliana		GO:0055114~oxidation-reduction process,	GO:0005794~Golgi apparatus,GO:0016021~integral component of membrane,	GO:0008805~carbon-monoxide oxygenase activity,GO:0016491~oxidoreductase activity,GO:0046872~metal ion binding,	IPR006593:Cytochrome b561/ferric reductase transmembrane,			SM00665:B561,	3D-structure,Complete proteome,Electron transport,Heme,Iron,Membrane,Metal-binding,Oxidoreductase,Reference proteome,Transmembrane,Transmembrane helix,Transport,
NODE_239293_length_1129_cov_5.071745	NP_001233971	58.824	1.05e-28	117	alpha-galactosidase(AGAL)	Solanum lycopersicum		GO:0005975~carbohydrate metabolic process,	GO:0009505~plant-type cell wall,	GO:0052692~raffinose alpha-galactosidase activity,	IPR000111:Glycoside hydrolase, clan GH-D,IPR002241:Glycoside hydrolase, family 27,IPR013780:Glycosyl hydrolase, family 13, all-beta,IPR013785:Aldolase-type TIM barrel,IPR017853:Glycoside hydrolase, superfamily,	sly00052:Galactose metabolism,sly00561:Glycerolipid metabolism,sly00600:Sphingolipid metabolism,sly00603:Glycosphingolipid biosynthesis - globo series,			Complete proteome,Disulfide bond,Glycosidase,Hydrolase,Reference proteome,Signal,
NODE_471116_length_2816_cov_4.897372	NP_001233971	37.008	1.77e-15	81.3	alpha-galactosidase(AGAL)	Solanum lycopersicum		GO:0005975~carbohydrate metabolic process,	GO:0009505~plant-type cell wall,	GO:0052692~raffinose alpha-galactosidase activity,	IPR000111:Glycoside hydrolase, clan GH-D,IPR002241:Glycoside hydrolase, family 27,IPR013780:Glycosyl hydrolase, family 13, all-beta,IPR013785:Aldolase-type TIM barrel,IPR017853:Glycoside hydrolase, superfamily,	sly00052:Galactose metabolism,sly00561:Glycerolipid metabolism,sly00600:Sphingolipid metabolism,sly00603:Glycosphingolipid biosynthesis - globo series,			Complete proteome,Disulfide bond,Glycosidase,Hydrolase,Reference proteome,Signal,
NODE_601475_length_1107_cov_4.755194	NP_001233971	49.275	4.61e-15	68.6	alpha-galactosidase(AGAL)	Solanum lycopersicum		GO:0005975~carbohydrate metabolic process,	GO:0009505~plant-type cell wall,	GO:0052692~raffinose alpha-galactosidase activity,	IPR000111:Glycoside hydrolase, clan GH-D,IPR002241:Glycoside hydrolase, family 27,IPR013780:Glycosyl hydrolase, family 13, all-beta,IPR013785:Aldolase-type TIM barrel,IPR017853:Glycoside hydrolase, superfamily,	sly00052:Galactose metabolism,sly00561:Glycerolipid metabolism,sly00600:Sphingolipid metabolism,sly00603:Glycosphingolipid biosynthesis - globo series,			Complete proteome,Disulfide bond,Glycosidase,Hydrolase,Reference proteome,Signal,
NODE_239293_length_1129_cov_5.071745	NP_001267530	60.784	7.76e-29	117	alpha-galactosidase-like(LOC101211924)	Cucumis sativus		GO:0005975~carbohydrate metabolic process,		GO:0052692~raffinose alpha-galactosidase activity,	IPR000111:Glycoside hydrolase, clan GH-D,IPR002241:Glycoside hydrolase, family 27,IPR013780:Glycosyl hydrolase, family 13, all-beta,IPR013785:Aldolase-type TIM barrel,IPR017853:Glycoside hydrolase, superfamily,	csv00052:Galactose metabolism,csv00561:Glycerolipid metabolism,csv00600:Sphingolipid metabolism,csv00603:Glycosphingolipid biosynthesis - globo series,			Complete proteome,Disulfide bond,Glycosidase,Hydrolase,Reference proteome,Signal,
NODE_239293_length_1129_cov_5.071745	NP_001313170	58.824	4.08e-28	115	alpha-galactosidase-like(LOC107830401)	Nicotiana tabacum		GO:0005975~carbohydrate metabolic process,		GO:0052692~raffinose alpha-galactosidase activity,	IPR000111:Glycoside hydrolase, clan GH-D,IPR002241:Glycoside hydrolase, family 27,IPR013780:Glycosyl hydrolase, family 13, all-beta,IPR013785:Aldolase-type TIM barrel,IPR017853:Glycoside hydrolase, superfamily,				Disulfide bond,Glycosidase,Hydrolase,Signal,
NODE_471116_length_2816_cov_4.897372	NP_001313170	36.667	1.49e-14	78.2	alpha-galactosidase-like(LOC107830401)	Nicotiana tabacum		GO:0005975~carbohydrate metabolic process,		GO:0052692~raffinose alpha-galactosidase activity,	IPR000111:Glycoside hydrolase, clan GH-D,IPR002241:Glycoside hydrolase, family 27,IPR013780:Glycosyl hydrolase, family 13, all-beta,IPR013785:Aldolase-type TIM barrel,IPR017853:Glycoside hydrolase, superfamily,				Disulfide bond,Glycosidase,Hydrolase,Signal,
NODE_601475_length_1107_cov_4.755194	NP_001313170	53.846	1.88e-15	67.8	alpha-galactosidase-like(LOC107830401)	Nicotiana tabacum		GO:0005975~carbohydrate metabolic process,		GO:0052692~raffinose alpha-galactosidase activity,	IPR000111:Glycoside hydrolase, clan GH-D,IPR002241:Glycoside hydrolase, family 27,IPR013780:Glycosyl hydrolase, family 13, all-beta,IPR013785:Aldolase-type TIM barrel,IPR017853:Glycoside hydrolase, superfamily,				Disulfide bond,Glycosidase,Hydrolase,Signal,
NODE_239790_length_3094_cov_4.615708	NP_189929	52.439	1.53e-20	91.3	RING/U-box superfamily protein(AT3G43430)	Arabidopsis thaliana			GO:0016021~integral component of membrane,	GO:0008270~zinc ion binding,	IPR001841:Zinc finger, RING-type,IPR013083:Zinc finger, RING/FYVE/PHD-type,			SM00184:RING,	Complete proteome,Membrane,Reference proteome,Transmembrane,Transmembrane helix,
NODE_240064_length_1744_cov_4.837156	NP_001170228	60	2.27e-06	50.8	putative MYB DNA-binding domain superfamily protein(LOC100384181)	Zea mays				GO:0003677~DNA binding,	IPR001005:SANT/Myb domain,IPR009057:Homeodomain-like,IPR017930:Myb domain,			SM00717:SANT,	Complete proteome,DNA-binding,Reference proteome,
NODE_241022_length_1572_cov_4.346692	NP_001328508	67.5	5.86e-08	55.5	TIFY domain/Divergent CCT motif family protein(PPD1)	Arabidopsis thaliana		GO:0042127~regulation of cell proliferation,GO:0048366~leaf development,	GO:0005634~nucleus,	GO:0003677~DNA binding,GO:0005515~protein binding,	IPR010399:Tify,IPR018467:CO/COL/TOC1, conserved site,			SM00979:SM00979,	Alternative splicing,Complete proteome,Developmental protein,DNA-binding,Nucleus,Reference proteome,	chain:Protein TIFY 4A,domain:Tify,
NODE_243222_length_2403_cov_4.250520	NP_177758	53.448	6.17e-25	73.2	CYCLIN B2;4(CYCB2;4)	Arabidopsis thaliana		GO:0007049~cell cycle,GO:0051301~cell division,GO:0051726~regulation of cell cycle,	GO:0005634~nucleus,	GO:0005515~protein binding,GO:0016538~cyclin-dependent protein serine/threonine kinase regulator activity,	IPR004367:Cyclin, C-terminal domain,IPR006671:Cyclin, N-terminal,IPR013763:Cyclin-like,			SM00385:CYCLIN,SM01332:SM01332,	Cell cycle,Cell division,Complete proteome,Cyclin,Reference proteome,	chain:Cyclin-B2-4,
NODE_243247_length_2568_cov_4.409657	NP_001234779	91.111	5.04e-17	87.8	MAP3K epsilon protein kinase(MAPKKKe)	Solanum lycopersicum				GO:0004672~protein kinase activity,GO:0005524~ATP binding,	IPR000225:Armadillo,IPR000719:Protein kinase, catalytic domain,IPR001245:Serine-threonine/tyrosine-protein kinase catalytic domain,IPR008271:Serine/threonine-protein kinase, active site,IPR011009:Protein kinase-like domain,IPR011989:Armadillo-like helical,IPR016024:Armadillo-type fold,IPR017441:Protein kinase, ATP binding site,			SM00185:ARM,SM00220:S_TKc,
NODE_243266_length_1110_cov_3.481982	NP_001280888	66.667	3.51e-09	58.5	putative Myb family transcription factor At1g14600(MYBR14)	Malus domestica		GO:0006351~transcription, DNA-templated,GO:0006355~regulation of transcription, DNA-templated,	GO:0005634~nucleus,	GO:0003677~DNA binding,	IPR001005:SANT/Myb domain,IPR006447:Myb domain, plants,IPR009057:Homeodomain-like,IPR017930:Myb domain,				Nucleus,Transcription,Transcription regulation,
NODE_244689_length_2319_cov_4.709357	NP_191710	54.93	2.29e-107	330	ACC synthase 1(ACS1)	Arabidopsis thaliana		GO:0009058~biosynthetic process,GO:0009693~ethylene biosynthetic process,	GO:0005737~cytoplasm,	GO:0003824~catalytic activity,GO:0016847~1-aminocyclopropane-1-carboxylate synthase activity,GO:0030170~pyridoxal phosphate binding,	IPR004838:Aminotransferases, class-I, pyridoxal-phosphate-binding site,IPR004839:Aminotransferase, class I/classII,IPR015421:Pyridoxal phosphate-dependent transferase, major region, subdomain 1,IPR015422:Pyridoxal phosphate-dependent transferase, major region, subdomain 2,IPR015424:Pyridoxal phosphate-dependent transferase,	ath00270:Cysteine and methionine metabolism,ath01100:Metabolic pathways,ath01110:Biosynthesis of secondary metabolites,			Complete proteome,Pyridoxal phosphate,Reference proteome,	chain:1-aminocyclopropane-1-carboxylate synthase-like protein 1,modified residue,mutagenesis site,
NODE_245103_length_1873_cov_5.100908	NP_001145729	59.036	2.95e-22	102	uncharacterized LOC100279236(si606015d04)	Zea mays				GO:0005089~Rho guanyl-nucleotide exchange factor activity,	IPR005512:Plant specific Rop nucleotide exchanger, PRONE,				Complete proteome,Reference proteome,
NODE_245360_length_974_cov_4.734086	NP_001143511	68.966	6.22e-16	79.3	uncharacterized LOC100276194(LOC100276194)	Zea mays									Complete proteome,Reference proteome,
NODE_246486_length_4350_cov_4.473333	NP_189568	39.61	3.71e-112	368	Tetratricopeptide repeat (TPR)-like superfamily protein(AT3G29230)	Arabidopsis thaliana			GO:0005739~mitochondrion,		IPR002885:Pentatricopeptide repeat,IPR011990:Tetratricopeptide-like helical,				Complete proteome,Reference proteome,Repeat,	chain:Pentatricopeptide repeat-containing protein At3g29230,region of interest:Type E motif,region of interest:Type E(+) motif,repeat:PPR 1,repeat:PPR 10,repeat:PPR 11,repeat:PPR 12,repeat:PPR 13,repeat:PPR 2,repeat:PPR 3,repeat:PPR 4,repeat:PPR 5,repeat:PPR 6,repeat:PPR 7,repeat:PPR 8,repeat:PPR 9,
NODE_246486_length_4350_cov_4.473333	NP_193218	40.312	1.25e-104	351	Pentatricopeptide repeat (PPR) superfamily protein(AT4G14820)	Arabidopsis thaliana			GO:0009507~chloroplast,	GO:0008270~zinc ion binding,	IPR002885:Pentatricopeptide repeat,IPR011990:Tetratricopeptide-like helical,				Complete proteome,Reference proteome,Repeat,	chain:Pentatricopeptide repeat-containing protein At4g14820,compositionally biased region:Poly-Ser,region of interest:Type DYW motif,region of interest:Type E motif,region of interest:Type E(+) motif,repeat:PPR 1,repeat:PPR 10,repeat:PPR 11,repeat:PPR 12,repeat:PPR 13,repeat:PPR 2,repeat:PPR 3,repeat:PPR 4,repeat:PPR 5,repeat:PPR 6,repeat:PPR 7,repeat:PPR 8,repeat:PPR 9,
NODE_246663_length_2265_cov_5.046358	NP_001141780	68.182	2.46e-12	70.5	uncharacterized LOC100273916(LOC100273916)	Zea mays				GO:0003677~DNA binding,	IPR011598:Myc-type, basic helix-loop-helix (bHLH) domain,			SM00353:HLH,	Complete proteome,DNA-binding,Reference proteome,
NODE_248056_length_5874_cov_4.788900	NP_064090	41.176	1.16e-06	51.6	ATPase subunit 8(atp8)	Beta vulgaris subsp. vulgaris			GO:0005739~mitochondrion,GO:0016021~integral component of membrane,	GO:0016820~hydrolase activity, acting on acid anhydrides, catalyzing transmembrane movement of substances,	IPR003319:ATPase, F0 complex, subunit 8, mitochondrial, plant,IPR009455:ATP synthase YMF19, uncharacterised, C-terminal,				Membrane,Mitochondrion,Transmembrane,Transmembrane helix,
NODE_248217_length_3066_cov_4.911285	NP_001313779	64.179	5.66e-50	178	homeobox-leucine zipper protein HAT5-like(LOC107897578)	Gossypium hirsutum			GO:0005634~nucleus,	GO:0003700~transcription factor activity, sequence-specific DNA binding,GO:0043565~sequence-specific DNA binding,	IPR000047:Helix-turn-helix motif,IPR001356:Homeodomain,IPR003106:Leucine zipper, homeobox-associated,IPR009057:Homeodomain-like,IPR017970:Homeobox, conserved site,			SM00389:HOX,	Coiled coil,DNA-binding,Homeobox,Nucleus,
NODE_248217_length_3066_cov_4.911285	NP_001315708	57.333	6.66e-49	178	homeobox-leucine zipper protein HAT5-like(LOC103411168)	Malus domestica			GO:0005634~nucleus,	GO:0003700~transcription factor activity, sequence-specific DNA binding,GO:0043565~sequence-specific DNA binding,	IPR000047:Helix-turn-helix motif,IPR001356:Homeodomain,IPR003106:Leucine zipper, homeobox-associated,IPR009057:Homeodomain-like,IPR017970:Homeobox, conserved site,			SM00389:HOX,	DNA-binding,Homeobox,Nucleus,
NODE_248601_length_1872_cov_4.592414	NP_001242051	71.831	1.74e-23	103	uncharacterized LOC100791853(LOC100791853)	Glycine max			GO:0016021~integral component of membrane,		IPR021261:Protein of unknown function DUF2838,				Membrane,Transmembrane,Transmembrane helix,
NODE_24875_length_1274_cov_4.427786	NP_001237210	35.156	1.29e-29	117	lectin(LOC732576)	Glycine max				GO:0030246~carbohydrate binding,	IPR000985:Legume lectin, alpha chain, conserved site,IPR001220:Legume lectin domain,IPR013320:Concanavalin A-like lectin/glucanase, subgroup,IPR016363:Lectin,		PIRSF002690:L-type lectin, plant type,		Lectin,Signal,
NODE_367774_length_1768_cov_13.958711	NP_001237210	35.965	6.34e-27	112	lectin(LOC732576)	Glycine max				GO:0030246~carbohydrate binding,	IPR000985:Legume lectin, alpha chain, conserved site,IPR001220:Legume lectin domain,IPR013320:Concanavalin A-like lectin/glucanase, subgroup,IPR016363:Lectin,		PIRSF002690:L-type lectin, plant type,		Lectin,Signal,
NODE_24875_length_1274_cov_4.427786	NP_001148178	33.851	1.66e-26	114	protein kinase(LOC100281786)	Zea mays			GO:0016021~integral component of membrane,	GO:0004672~protein kinase activity,GO:0005524~ATP binding,GO:0030246~carbohydrate binding,	IPR000719:Protein kinase, catalytic domain,IPR000985:Legume lectin, alpha chain, conserved site,IPR001220:Legume lectin domain,IPR008271:Serine/threonine-protein kinase, active site,IPR011009:Protein kinase-like domain,IPR013320:Concanavalin A-like lectin/glucanase, subgroup,IPR017441:Protein kinase, ATP binding site,IPR019825:Legume lectin, beta chain, Mn/Ca-binding site,			SM00220:S_TKc,	Complete proteome,Kinase,Membrane,Reference proteome,Transferase,Transmembrane,Transmembrane helix,
NODE_24888_length_2461_cov_5.157660	NP_084749	76.923	4.28e-16	78.2	NADH dehydrogenase subunit 5(ndhF)	Oenothera elata subsp. hookeri		GO:0006810~transport,GO:0042773~ATP synthesis coupled electron transport,	GO:0009507~chloroplast,GO:0009535~chloroplast thylakoid membrane,GO:0016021~integral component of membrane,	GO:0008137~NADH dehydrogenase (ubiquinone) activity,GO:0048038~quinone binding,	IPR001516:NADH:ubiquinone oxidoreductase, chain 5/L, N-terminal,IPR001750:NADH:ubiquinone/plastoquinone oxidoreductase,IPR002128:NADH:ubiquinone/plastoquinone oxidoreductase, chloroplast chain 5, C-terminal,IPR003945:NADH-plastoquinone oxidoreductase, chain 5,IPR018393:NADH-plastoquinone oxidoreductase, chain 5 subgroup,				Chloroplast,Membrane,NAD,NADP,Oxidoreductase,Plastid,Plastoquinone,Quinone,Thylakoid,Transmembrane,Transmembrane helix,Transport,	chain:NAD(P)H-quinone oxidoreductase subunit 5, chloroplastic,transmembrane region,
NODE_25203_length_1801_cov_5.234314	NP_001242530	46.324	2.47e-47	127	probable xyloglucan endotransglucosylase/hydrolase protein 23-like(LOC100785313)	Glycine max		GO:0010411~xyloglucan metabolic process,GO:0042546~cell wall biogenesis,GO:0071555~cell wall organization,	GO:0005618~cell wall,GO:0048046~apoplast,	GO:0004553~hydrolase activity, hydrolyzing O-glycosyl compounds,GO:0016762~xyloglucan:xyloglucosyl transferase activity,	IPR000757:Glycoside hydrolase, family 16,IPR008263:Glycoside hydrolase, family 16, active site,IPR010713:Xyloglucan endo-transglycosylase, C-terminal,IPR013320:Concanavalin A-like lectin/glucanase, subgroup,IPR016455:Xyloglucan endotransglucosylase/hydrolase,		PIRSF005604:xyloglucan endotransglucosylase/hydrolase,		Apoplast,Cell wall,Cell wall biogenesis/degradation,Glycosidase,Hydrolase,Secreted,Signal,Transferase,
NODE_633768_length_1652_cov_4.368644	NP_001242530	69.136	2.65e-28	115	probable xyloglucan endotransglucosylase/hydrolase protein 23-like(LOC100785313)	Glycine max		GO:0010411~xyloglucan metabolic process,GO:0042546~cell wall biogenesis,GO:0071555~cell wall organization,	GO:0005618~cell wall,GO:0048046~apoplast,	GO:0004553~hydrolase activity, hydrolyzing O-glycosyl compounds,GO:0016762~xyloglucan:xyloglucosyl transferase activity,	IPR000757:Glycoside hydrolase, family 16,IPR008263:Glycoside hydrolase, family 16, active site,IPR010713:Xyloglucan endo-transglycosylase, C-terminal,IPR013320:Concanavalin A-like lectin/glucanase, subgroup,IPR016455:Xyloglucan endotransglucosylase/hydrolase,		PIRSF005604:xyloglucan endotransglucosylase/hydrolase,		Apoplast,Cell wall,Cell wall biogenesis/degradation,Glycosidase,Hydrolase,Secreted,Signal,Transferase,
NODE_25203_length_1801_cov_5.234314	NP_001267579	41.667	1.04e-42	117	probable xyloglucan endotransglucosylase/hydrolase protein 23-like(XTH3)	Cucumis sativus		GO:0010411~xyloglucan metabolic process,GO:0042546~cell wall biogenesis,GO:0071555~cell wall organization,	GO:0005618~cell wall,GO:0048046~apoplast,	GO:0004553~hydrolase activity, hydrolyzing O-glycosyl compounds,GO:0016762~xyloglucan:xyloglucosyl transferase activity,	IPR000757:Glycoside hydrolase, family 16,IPR008263:Glycoside hydrolase, family 16, active site,IPR008264:Beta-glucanase,IPR010713:Xyloglucan endo-transglycosylase, C-terminal,IPR013320:Concanavalin A-like lectin/glucanase, subgroup,IPR016455:Xyloglucan endotransglucosylase/hydrolase,		PIRSF005604:xyloglucan endotransglucosylase/hydrolase,		Apoplast,Cell wall,Cell wall biogenesis/degradation,Complete proteome,Glycosidase,Hydrolase,Reference proteome,Secreted,Signal,Transferase,
NODE_375161_length_1497_cov_4.885772	NP_001267579	68.116	2.64e-24	103	probable xyloglucan endotransglucosylase/hydrolase protein 23-like(XTH3)	Cucumis sativus		GO:0010411~xyloglucan metabolic process,GO:0042546~cell wall biogenesis,GO:0071555~cell wall organization,	GO:0005618~cell wall,GO:0048046~apoplast,	GO:0004553~hydrolase activity, hydrolyzing O-glycosyl compounds,GO:0016762~xyloglucan:xyloglucosyl transferase activity,	IPR000757:Glycoside hydrolase, family 16,IPR008263:Glycoside hydrolase, family 16, active site,IPR008264:Beta-glucanase,IPR010713:Xyloglucan endo-transglycosylase, C-terminal,IPR013320:Concanavalin A-like lectin/glucanase, subgroup,IPR016455:Xyloglucan endotransglucosylase/hydrolase,		PIRSF005604:xyloglucan endotransglucosylase/hydrolase,		Apoplast,Cell wall,Cell wall biogenesis/degradation,Complete proteome,Glycosidase,Hydrolase,Reference proteome,Secreted,Signal,Transferase,
NODE_25206_length_3850_cov_4.887792	NP_001132271	41.758	2.85e-12	70.5	uncharacterized LOC100193707(LOC100193707)	Zea mays					IPR000073:Alpha/beta hydrolase fold-1,				Complete proteome,Reference proteome,
NODE_25215_length_1280_cov_4.662500	NP_001144611	88.095	1.36e-18	89	uncharacterized LOC100277627(LOC100277627)	Zea mays				GO:0003676~nucleic acid binding,GO:0046872~metal ion binding,	IPR007087:Zinc finger, C2H2,IPR013087:Zinc finger C2H2-type/integrase DNA-binding domain,
NODE_252783_length_2484_cov_5.137279	NP_001237888	76.471	2.39e-19	89.4	uncharacterized LOC100500170(LOC100500170)	Glycine max				GO:0000166~nucleotide binding,GO:0003676~nucleic acid binding,	IPR000504:RNA recognition motif domain,IPR012677:Nucleotide-binding, alpha-beta plait,	gmx03040:Spliceosome,		SM00360:RRM,
NODE_252783_length_2484_cov_5.137279	NP_001154288	76.471	2.69e-19	88.6	RNA-binding (RRM/RBD/RNP motifs) family protein(AT4G35785)	Arabidopsis thaliana			GO:0005634~nucleus,GO:0030529~intracellular ribonucleoprotein complex,	GO:0000166~nucleotide binding,GO:0003676~nucleic acid binding,GO:0003729~mRNA binding,	IPR000504:RNA recognition motif domain,IPR012677:Nucleotide-binding, alpha-beta plait,	ath03040:Spliceosome,		SM00360:RRM,	Complete proteome,Reference proteome,
[truncated: 1,409 more rows]
