# Supplementary material for: Contrasting Reproductive Strategies of Two Nymphaea Species Affect Existing Natural Genetic Diversity as Assessed by Microsatellite Markers: Implications for Conservation and Wetlands Restoration
Source: Front Plant Sci. 2022 Mar 9;13:773572. doi: 10.3389/fpls.2022.773572 (PMC8965595; doi:10.3389/fpls.2022.773572)
Supplement: Supplementary Table 6 — Cross species amplification of 57 polymorphic SSR loci in Nymphaea. [file Table_6.XLSX]

## Sheet: Sheet1
Supplementary Table 6: Cross species amplification of 57 polymorphic SSR loci in Nymphaea.
Marker	Nymphaea caerulea	Nymphaea x khooroi	Nymphaea pubescens	Nymphaea malabarica	Nymphaea rubra	Nymphaea nouchali	Nymphaea micrantha
Nym_NGS1	+	+	+	+	+	+	+
Nym_NGS7	+	+	+	+	+	+	+
Nym_NGS8	+	-	-	+	+	+	+
Nym_NGS11	+	+	+	+	+	+	+
Nym_NGS21	+	-	-	+	-	+	+
Nym_NGS28	+	-	-	+	-	+	+
Nym_NGS31	-	-	-	+	-	+	+
Nym_NGS33	+	+	-	+	-	+	+
Nym_NGS34	+	+	-	+	-	+	+
Nym_NGS35	+	-	+	+	+	+	+
Nym_NGS36	+	+	-	+	-	+	+
Nym_NGS40	+	+	-	+	+	+	+
Nym_NGS45	+	+	+	+	+	+	+
Nym_NGS46	-	-	-	-	-	+	+
Nym_NGS51	+	-	-	+	+	+	+
Nym_NGS53	+	-	+	+	+	+	+
Nym_NGS54	+	-	-	+	-	+	+
Nym_NGS55	+	+	+	+	+	+	+
Nym_NGS61	+	-	-	+	-	+	+
Nym_NGS62	+	+	+	+	+	+	+
Nym_NGS63	+	-	-	+	+	+	+
Nym_NGS64	+	-	-	+	-	+	+
Nym_NGS65	+	+	-	+	+	+	+
Nym_NGS70	+	-	+	+	+	+	+
Nym_NGS71	+	-	+	+	+	+	+
Nym_NGS72	-	+	+	+	+	+	+
Nym_NGS75	+	-	+	+	-	+	+
Nym_NGS76	+	+	+	+	+	+	+
Nym_NGS77	+	-	+	+	+	+	+
Nym_NGS82	+	-	-	+	-	+	+
Nym_NGS83	+	-	+	+	-	+	+
Nym_NGS90	+	-	+	+	+	+	+
Nym_NGS91	+	-	-	+	-	+	+
Nym_NGS94	+	-	+	+	-	+	+
NymTr_3	+	-	-	+	+	+	+
NymTr_4	-	-	-	+	+	+	+
NymTr_5	+	-	-	-	-	+	+
NymTr_9	+	+	-	+	-	+	+
NymTr_11	+	+	+	+	+	+	+
NymTr_12	+	+	-	+	-	+	+
NymTr_13	+	-	+	+	+	+	+
NymTr_15	+	-	+	+	+	+	+
NymTr_16	+	-	-	+	+	+	+
NymTr_17	+	-	-	+	-	+	+
NymTr_18	+	+	+	+	-	+	+
NymTr_19	+	-	-	+	-	+	+
NymTr_20	+	+	+	+	-	+	+
NymTr_21	-	-	-	+	+	+	+
NymTr_22	+	-	+	+	+	+	+
NymTr_24	+	+	+	+	+	+	+
NymTr_26	+	+	+	+	+	+	+
NymTr_27	+	-	-	+	-	+	+
NymTr_28	+	+	+	+	+	+	+
NymTr_30	+	-	+	+	+	+	+
NymTr_31	+	-	+	+	+	+	+
NymTr_41	+	+	-	+	-	+	+
NymTr_42	+	-	-	+	-	+	+
Amplified/Total primers	52/57	22/57	28/57	55/57	32/57	57/57	57/57
% cross-species transferabilty	0.9123	0.386	0.4912	0.9649	0.5614	1	1
+ sign indicates amplification and - sign indicates no aplification of the marker
